# Supplementary material for: Distinct proteome pathology of circulating microparticles in systemic lupus erythematosus
Source: Clin Proteomics. 2017 Jun 21;14:23. doi: 10.1186/s12014-017-9159-8 (PMC5479039; doi:10.1186/s12014-017-9159-8)
Supplement: Supplementary file 2 — Additional file 2. Data file SLE-HC.xlsx. [file 12014_2017_9159_MOESM2_ESM.xlsx]

## Sheet: proteinGroups_1-1-1-36_SLE
id	Peptide IDs	Oxidation (M) Site IDs	Oxidation (M) Site Positions	Protein IDs	Majority Protein IDs	FirstID1	Peptide Counts (all)	Peptide Counts (razor+unique)	Peptide Counts (unique)	Protein Names	Gene Names	Protein Descriptions	Uniprot	Proteins	Peptides	Razor Peptides	Unique Peptides	Peptides NOR-107	Peptides NOR-118	Peptides SLE-068	Peptides SLE-069	Razor Peptides NOR-107	Razor Peptides NOR-118	Razor Peptides SLE-068	Razor Peptides SLE-069	Unique Peptides NOR-107	Unique Peptides NOR-118	Unique Peptides SLE-068	Unique Peptides SLE-069	Sequence Coverage [%]	Unique + Razor Sequence Coverage [%]	Unique Sequence Coverage [%]	Mol. Weight [kDa]	Sequence Length	Experiment NOR-107	Experiment NOR-118	Experiment SLE-068	Experiment SLE-069	PEP	Intensity	Intensity NOR-107	Intensity NOR-118	Intensity SLE-068	Intensity SLE-069	LFQ Intensity NOR-107	LFQ Intensity NOR-118	LFQ Intensity SLE-068	LFQ Intensity SLE-069	Valid Columns
3	667;1513;3036			CON__P02533;IPI00384444;IPI00180956;IPI00240503;IPI00798387;CON__Q9QWL7;CON__Q04695;IPI00450768;IPI00791852;IPI00792454	CON__P02533;IPI00384444;IPI00180956;IPI00240503;IPI00798387;CON__Q9QWL7;CON__Q04695;IPI00450768;IPI00791852	CON__P02533	3;3;2;2;2;2;2;2;2;1	1;1;1;1;1;1;1;1;1;1	1;1;1;1;1;1;1;1;1;1	Cytokeratin-14;Keratin, type I cytoskeletal 14;Keratin-14;Putative uncharacterized protein ENSP00000382160;Putative uncharacterized protein ENSP00000319235;Cytokeratin-17;Keratin, type I cytoskeletal 17;Keratin-17;39.1;Radiated keratinocyte mRNA 266 (keratin-related protein)	KRT14;Krt1-17;Krt17;KRT17	>P02533 SWISS-PROT:P02533 Tax_Id=9606 Gene_Symbol=KRT14 Keratin, type I cytoskeletal 14;Keratin, type I cytoskeletal 14;Putative uncharacterized protein KRT17P1;48 kDa protein;Putative uncharacterized protein ENSP00000319235;>Q9QWL7 SWISS-PROT:Q9QWL7 Tax_I	P02533;A8MW45;C9JH30;Q9QWL7;Q04695;Q14666	10	3	1	1	2	3	3	3	1	1	1	1	1	1	1	1	6.1	2.8	2.8	51.621	472	1	1	1	1	2.92e-16	285780	33418	14274	113020	125070	13916	6425.4	38909	312860	4
5	1513;2694;3036			CON__P08779;IPI00217963	CON__P08779;IPI00217963	CON__P08779	3;3	1;1	1;1	Cytokeratin-16;Keratin, type I cytoskeletal 16;Keratin-16;Keratin	KRT16;KRT16A;keratin	>P08779 SWISS-PROT:P08779 Tax_Id=9606 Gene_Symbol=KRT16 Keratin, type I cytoskeletal 16;Keratin, type I cytoskeletal 16	P08779;Q16195	2	3	1	1	1	2	3	3	0	0	1	1	0	0	1	1	5.5	2.1	2.1	51.267	473			1	1	1.06e-08	195650	0	0	108150	87506	0	0	92764	155320	2
6	11;12;111;269;614;1031;1513;1625;2084;2121;2487;2526;2910;3036	4	271	CON__P13645;IPI00009865;CON__P02535-1;CON__Q7Z3Y7;IPI00418663;CON__Q148H6;CON__Q7Z3Y8;IPI00328103;CON__A2A4G1;CON__Q7Z3Z0;IPI00375911;IPI00789750;CON__Q99456;IPI00015309;CON__Q3ZAW8;CON__Q9Z2K1;CON__Q7Z3Y9;IPI00375910;IPI00290077;CON__P19012;IPI00873598;CON__P08730-1;CON__P05784;CON__P19001;CON__P08727;IPI00479145;IPI00791576;IPI00791156;IPI00879511;IPI00908905;IPI00929669;IPI00794644;IPI00793646…	CON__P13645;IPI00009865	CON__P13645	14;14;3;2;2;2;2;2;2;2;2;2;1;1;1;1;1;1;1;1;1;1;1;1;1;1;1;1;1;1;1;1;1;1;1;1;1;1;1;1;1	13;13;3;2;2;2;2;2;1;2;2;1;0;0;1;1;1;1;0;0;0;0;0;0;0;0;1;0;0;0;0;0;0;0;0;0;0;0;0;0;0	12;12;2;1;1;1;1;1;0;1;1;0;0;0;0;0;0;0;0;0;0;0;0;0;0;0;0;0;0;0;0;0;0;0;0;0;0;0;0;0;0	Cytokeratin-10;Keratin, type I cytoskeletal 10;Keratin-10	KPP;KRT10	>P13645 SWISS-PROT:P13645 Tax_Id=9606 Gene_Symbol=KRT10 Keratin, type I cytoskeletal 10;Keratin, type I cytoskeletal 10	P13645	41	14	13	12	13	14	13	14	13	13	12	13	12	12	11	12	31.2	30	28.5	59.51	593	17	17	17	17	7.09e-208	25537000	3094100	2411700	14514000	5517400	2473400	2078600	18137000	7544100	4
8	561			CON__P17690;IPI00298828;IPI00910625	CON__P17690;IPI00298828;IPI00910625	CON__P17690	1;1;1	1;1;1	1;1;1	Activated protein C-binding protein;Anticardiolipin cofactor;APC inhibitor;Apolipoprotein H;Beta-2-glycoprotein 1;Beta-2-glycoprotein I;cDNA FLJ51265, moderately similar to Beta-2-glycoprotein 1 (Beta-2-glycoprotein I)	APOH;B2G1	>P17690 SWISS-PROT:P17690 (Bos taurus) Beta-2-glycoprotein 1 precursor;Beta-2-glycoprotein 1;cDNA FLJ51265, moderately similar to Beta-2-glycoprotein 1	P17690;P02749;B4DPN0	3	1	1	1	1	1	1	1	1	1	1	1	1	1	1	1	2.6	2.6	2.6	38.252	345	2	2	2	2	0.0048966	15631000	5650500	3408400	5123300	1448500	7545100	4266000	5137400	1782800	4
9	337;420;565;918;1246;1313;1513;1968;2135;2136;2201;2217;2293;2401;2402;2701;2709;2988			CON__P35527;IPI00019359	CON__P35527;IPI00019359	CON__P35527	18;18	18;18	17;17	Cytokeratin-9;Keratin, type I cytoskeletal 9;Keratin-9	KRT9	>P35527 SWISS-PROT:P35527 Tax_Id=9606 Gene_Symbol=KRT9 Keratin, type I cytoskeletal 9;Keratin, type I cytoskeletal 9	P35527	2	18	18	17	16	18	18	18	16	18	18	18	16	17	17	17	35	35	33.9	62.129	623	19	22	23	23	1.87e-280	58889000	6703800	4043700	23024000	25117000	6370200	3146500	22645000	44425000	4
10	182;709;764;1099;1199			CON__P35908;IPI00021304	CON__P35908;IPI00021304	CON__P35908	5;5	2;2	1;1	Cytokeratin-2e;Epithelial keratin-2e;Keratin, type II cytoskeletal 2 epidermal;Keratin-2 epidermis;Keratin-2e;Type-II keratin Kb2	KRT2;KRT2A;KRT2E	>P35908 SWISS-PROT:P35908 Tax_Id=9606 Gene_Symbol=KRT2 Keratin, type II cytoskeletal 2 epidermal;Keratin, type II cytoskeletal 2 epidermal	P35908	2	5	2	1	5	5	5	5	2	2	2	2	1	1	1	1	8.1	3.6	2.5	65.865	645	2	2	2	2	2.76e-53	1124100	158390	124280	476160	365300	98902	72570	268520	974430	4
14	709;2042;2478;3145			CON__Q5XQN5;CON__Q922U2;CON__P13647;IPI00009867;IPI00796776;CON__P50446;CON__Q8BGZ7;CON__Q8VED5;IPI00554648;CON__P05787;IPI00792642;IPI00791912;CON__Q01546;IPI00008359;CON__P12035;IPI00290857;IPI00942512;IPI00939892;CON__Q6ISB0;CON__Q9NSB2;IPI00300052;CON__O95678;IPI00005859;CON__Q32MB2;IPI00174775;CON__Q5XKE5;IPI00241841;CON__Q7RTS7;IPI00329306;CON__P07744;CON__Q3SY84;IPI00061200;CON__Q14CN4-1;I…	CON__Q5XQN5;CON__Q922U2;CON__P13647;IPI00009867;IPI00796776;CON__P50446;CON__Q8BGZ7;CON__Q8VED5;IPI00554648;CON__P05787;IPI00792642;IPI00791912	CON__Q5XQN5	4;4;3;3;3;2;2;2;2;2;2;2;1;1;1;1;1;1;1;1;1;1;1;1;1;1;1;1;1;1;1;1;1;1;1;1;1;1;1;1;1;1;1;1;1;1;1	1;1;1;1;1;0;0;0;0;0;0;0;0;0;0;0;0;0;0;0;0;0;0;0;0;0;0;0;0;0;0;0;0;0;0;0;0;0;0;0;0;0;0;0;0;0;0	1;1;1;1;1;0;0;0;0;0;0;0;0;0;0;0;0;0;0;0;0;0;0;0;0;0;0;0;0;0;0;0;0;0;0;0;0;0;0;0;0;0;0;0;0;0;0	Cytokeratin-5;Keratin, type II cytoskeletal 5;Keratin-5;Type-II keratin Kb5;58 kDa cytokeratin;cDNA FLJ59922, highly similar to Keratin, type II cytoskeletal 5;cDNA FLJ54081, highly similar to Keratin, type II cytoskeletal 5;Cytokeratin-6A;Keratin, type II cytoskeletal 6A;Keratin-6A;Keratin-6-alpha;Cytokeratin-75;Keratin, type II cytoskeletal 75;Keratin-6 hair follicle;Keratin-75;Type II keratin-…	Krt2-5;Krt5;KRT5;Ker2;Krt2-6;Krt2-6a;Krt6;Krt6a;Kb18;Krt75;Krt2-6hf;Krtcap1;Kb38;Krt79;CYK8;KRT8	>Q5XQN5 SWISS-PROT:Q5XQN5 (Bos taurus) Keratin, type II cytoskeletal 5;>Q922U2 SWISS-PROT:Q922U2 Tax_Id=10090 Gene_Symbol=Krt5 Keratin, type II cytoskeletal 5;>P13647 SWISS-PROT:P13647 Tax_Id=9606 Gene_Symbol=KRT5 Keratin, type II cytoskeletal 5;Keratin, t	Q5XQN5;Q922U2;P13647;B4DL32;B4E1T1;P50446;Q8BGZ7;Q99MH7;Q8VED5;P05787;A8K4H3;Q7L4M3;Q969I0	47	4	1	1	3	3	3	4	0	0	0	1	0	0	0	1	6.5	1.7	1.7	62.936	601				1	2.67e-21	77359	0	0	0	77359	0	0	0	123710	1
17	1574			IPI00000151;IPI00917837;IPI00926712	IPI00000151;IPI00917837;IPI00926712	IPI00000151	1;1;1	1;1;1	1;1;1	Integrin beta-6;Integrin beta	ITGB6	Integrin beta-6;Integrin beta;Putative uncharacterized protein ITGB6	P18564;A8K2N5;B4E2B8;C9JA97	3	1	1	1	1	1	1	1	1	1	1	1	1	1	1	1	1.1	1.1	1.1	85.935	788	1	1	1	1	0.0057333	3279400	1543600	938010	504990	292730	2136000	1219600	373570	337660	4
20	398;444;503;698;1896;2050;3185;3261			IPI00000816;IPI00793344;IPI00086909;IPI00792761;IPI00795516;IPI00940628;IPI00903243	IPI00000816;IPI00793344	IPI00000816	8;4;2;2;2;2;1	6;3;2;1;1;1;1	6;3;2;1;1;1;1	14-3-3 protein epsilon;cDNA, FLJ79100, highly similar to 14-3-3 protein epsilon (14-3-3E);14-3-3 protein epsilon isoform transcript variant 1;cDNA FLJ51851, highly similar to 14-3-3 protein epsilon (14-3-3E);cDNA, FLJ79084, highly similar to 14-3-3 protein epsilon (14-3-3E)	YWHAE	14-3-3 protein epsilon;22 kDa protein	P62258;B7ZA86;Q4VJB6	7	8	6	6	8	8	8	8	6	6	6	6	6	6	6	6	40	32.9	32.9	29.174	255	9	8	8	8	3.78e-182	18201000	5966700	4639800	4695500	2899500	7617500	6159400	4709100	4130400	4
22	1264			IPI00000875;IPI00937615;IPI00738381;IPI00908389;IPI00909534	IPI00000875;IPI00937615;IPI00738381;IPI00908389;IPI00909534	IPI00000875	1;1;1;1;1	1;1;1;1;1	1;1;1;1;1	cDNA FLJ56389, highly similar to Elongation factor 1-gamma;eEF-1B gamma;Elongation factor 1-gamma;Eukaryotic translation elongation factor 1 gamma;EEF1G protein;Eukaryotic translation elongation factor 1 gamma, isoform CRA_c;GIG35;cDNA FLJ59991, highly similar to Elongation factor 1-gamma;cDNA FLJ59433, highly similar to Elongation factor 1-gamma	EEF1G;EF1G;PRO1608;hCG_2039458	cDNA FLJ56389, highly similar to Elongation factor 1-gamma;Elongation factor 1-gamma;Elongation factor 1-gamma;cDNA FLJ59991, highly similar to Elongation factor 1-gamma;cDNA FLJ59433, highly similar to Elongation factor 1-gamma	B4DTG2;P26641;Q2F838;Q2F840;Q53YD7;B4DUK7;B4DUP0	5	1	1	1	1	1	1	1	1	1	1	1	1	1	1	1	2.1	2.1	2.1	56.149	487	1	1	1	1	0.00018881	492810	99823	90096	192050	110840	110670	107090	205460	184630	4
27	568;1990;2755			IPI00002255;IPI00945818;IPI00328195;IPI00872127;IPI00939641	IPI00002255;IPI00945818	IPI00002255	3;3;1;1;1	3;3;1;1;1	3;3;1;1;1	Beige-like protein;CDC4-like protein;Lipopolysaccharide-responsive and beige-like anchor protein;cDNA FLJ16600 fis, clone TESTI4006704, highly similar to Lipopolysaccharide-responsive and beige-like anchor protein;Beige-like protein variant;Putative uncharacterized protein DKFZp686K03100;LRBA protein;LPS-responsive vesicle trafficking, beach and anchor containing	BGL;CDC4L;LBA;LRBA;DKFZp686K03100	Isoform 1 of Lipopolysaccharide-responsive and beige-like anchor protein;Isoform 2 of Lipopolysaccharide-responsive and beige-like anchor protein	P50851-1;P50851;B3KVI6;Q59HC1;Q68D03;Q6P1X2;Q7KZN3;Q969R7;P50851-2	5	3	3	3	3	1	1	1	3	1	1	1	3	1	1	1	1.3	1.3	1.3	319.1	2863	3	1	1	1	0.00014608	388530	227620	60824	72137	27949	162940	134050	107880	66838	4
28	2859			IPI00002478;IPI00216762;IPI00216758;IPI00216760	IPI00002478;IPI00216762;IPI00216758;IPI00216760	IPI00002478	1;1;1;1	1;1;1;1	1;1;1;1	Endothelin-converting enzyme 1;cDNA FLJ59212, highly similar to Endothelin-converting enzyme 1 (EC 3.4.24.71);Endothelin converting enzyme 1, isoform CRA_e;Endothelin-converting enzyme-1c	ECE1;hCG_38869	Isoform B of Endothelin-converting enzyme 1;Isoform D of Endothelin-converting enzyme 1;Isoform A of Endothelin-converting enzyme 1;Isoform C of Endothelin-converting enzyme 1	P42892-1;P42892;B4DKB2;P42892-4;P42892-2;P42892-3;Q2Z2K8	4	1	1	1	1	1	1	1	1	1	1	1	1	1	1	1	2.3	2.3	2.3	87.163	770	1	1	1	1	0.023476	328370	145180	99598	42619	40975	145740	178490	35371	54381	4
30	1645			IPI00003111;IPI00387106	IPI00003111;IPI00387106	IPI00003111	1;1	1;1	1;1	Ig kappa chain V-I region AU;DNA rearranged by a t(2;8) translocation leading to Burkitt's lymphoma in the cell line JI (clone JIp);Ig kappa chain V-I region Ni		Ig kappa chain V-I region AU;Ig kappa chain V-I region Ni	P01594;Q6LBV5;P01613	2	1	1	1	1	1	1	1	1	1	1	1	1	1	1	1	13.7	13.7	13.7	12.848	117	1	1	1	1	0.021198	1049700	37102	46324	540930	425300	12629	17044	152210	1144600	4
32	1383;1612;1676;2419			IPI00003348;IPI00790302;IPI00790896;IPI00797969;IPI00925530;IPI00946201;IPI00029143;IPI00386304	IPI00003348;IPI00790302;IPI00790896;IPI00797969;IPI00925530;IPI00946201	IPI00003348	4;4;4;4;3;2;1;1	1;1;1;1;0;1;0;0	0;0;0;0;0;0;0;0	G protein subunit beta-2;Guanine nucleotide-binding protein G(I)/G(S)/G(T) subunit beta-2;Transducin beta chain 2;cDNA FLJ77321, highly similar to Homo sapiens guanine nucleotide binding protein (G protein), beta polypeptide 2 (GNB2), mRNA;GNB2 protein;Guanine nucleotide binding protein (G protein), beta polypeptide 2, isoform CRA_a;Putative uncharacterized protein GNB2;Putative uncharacterized p…	GNB2;hCG_20449;GNB4	Guanine nucleotide-binding protein G(I)/G(S)/G(T) subunit beta-2;Putative uncharacterized protein GNB2;Putative uncharacterized protein GNB2;Putative uncharacterized protein GNB2;32 kDa protein;Putative uncharacterized protein GNB4	P62879;Q6FHM2;C9JXA5;C9JIS1;C9JZN1;C9JD14	8	4	1	0	4	4	3	4	1	1	0	1	0	0	0	0	13.5	4.1	0	37.331	340	1	1		1	6.06e-24	1303200	656770	474910	0	171550	892170	616530	0	181050	3
34	369;791			IPI00003420;IPI00916186;IPI00915767;IPI00903288;IPI00552652	IPI00003420;IPI00916186;IPI00915767;IPI00903288;IPI00552652	IPI00003420	2;2;2;2;1	2;2;2;2;1	2;2;2;2;1	APC-binding protein EB2;End-binding protein 2;Microtubule-associated protein RP/EB family member 2;cDNA FLJ54006, highly similar to Microtubule-associated protein RP/EB family member 2;cDNA FLJ58487, highly similar to Microtubule-associated protein RP/EB family member 2;cDNA FLJ33626 fis, clone BRAMY2022160, highly similar to Microtubule-associated protein RP/EB family member 2	MAPRE2;RP1	Isoform 1 of Microtubule-associated protein RP/EB family member 2;microtubule-associated protein, RP/EB family, member 2 isoform 3;microtubule-associated protein, RP/EB family, member 2 isoform 2;cDNA FLJ33626 fis, clone BRAMY2022160, highly similar to Mic	Q15555-1;Q15555;B4DJV4;B7Z2L3;B3KR39;Q15555-2	5	2	2	2	2	2	2	2	2	2	2	2	2	2	2	2	8.9	8.9	8.9	37.031	327	2	2	2	2	2.86e-09	1822400	277390	298840	816930	429290	229730	282060	950120	767800	4
36	217			IPI00003817;IPI00792758;IPI00792537;IPI00794454	IPI00003817;IPI00792758;IPI00792537;IPI00794454	IPI00003817	1;1;1;1	1;1;1;1	1;1;1;1	Ly-GDI;Rho GDP-dissociation inhibitor 2;Rho-GDI beta;cDNA, FLJ92068, highly similar to Homo sapiens Rho GDP dissociation inhibitor (GDI) beta (ARHGDIB),mRNA	ARHGDIB;GDIA2;GDID4;RAP1GN1	Rho GDP-dissociation inhibitor 2;21 kDa protein;21 kDa protein;11 kDa protein	P52566;B2R4F3;B5BU79	4	1	1	1	1	1	1	1	1	1	1	1	1	1	1	1	12.9	12.9	12.9	22.988	201	1	1	1	1	6.05e-07	2043900	363960	309840	934750	435370	322810	297050	1108200	748260	4
37	186;275;563;1160;1238;2087;2319;2459;2522;2548;2774			IPI00003865;IPI00037070;IPI00939595;IPI00910870;IPI00007702;IPI00844513;IPI00877807;IPI00940553;IPI00902596;IPI00939526;IPI00910047;IPI00941328	IPI00003865;IPI00037070;IPI00939595;IPI00910870	IPI00003865	11;11;11;7;4;3;3;2;1;1;1;1	11;11;11;7;4;3;3;2;1;1;1;1	9;9;9;5;2;3;2;0;0;0;0;0	Heat shock 70 kDa protein 8;Heat shock cognate 71 kDa protein;cDNA FLJ77848;cDNA FLJ38781 fis, clone LIVER2000216, highly similar to HEAT SHOCK COGNATE 71 kDa PROTEIN;cDNA FLJ55485, highly similar to Heat shock cognate 71 kDa protein;Heat shock 70kDa protein 8 isoform 1 variant;Putative uncharacterized protein;HSPA8 protein;cDNA FLJ20564 fis, clone KAT12033;Uncharacterized bone marrow protein BM0…	HSC70;HSP73;HSPA10;HSPA8	Isoform 1 of Heat shock cognate 71 kDa protein;54 kDa protein;Isoform 2 of Heat shock cognate 71 kDa protein;cDNA FLJ59163, highly similar to Heat shock cognate 71 kDa protein	P11142-1;P11142;A8K7Q2;B3KTV0;B4E1Q1;Q53GZ6;Q96BE0;Q96H53;Q96IS6;Q9NWW3;Q9NZ87;P11142-2;Q53HF2;B4DTX2	12	11	11	9	11	10	11	10	11	10	11	10	9	8	9	8	24.1	24.1	19.7	70.897	646	12	11	12	11	3.81e-110	29636000	5719700	4691000	13938000	5286900	6177700	5864600	13814000	9588800	4
38	323;769;1867;1868;2297;2565;2636			IPI00003909;IPI00922751;IPI00152505;IPI00607720;IPI00816836;IPI00872375;IPI00220194;IPI00909237;IPI00641837;IPI00555680	IPI00003909;IPI00922751;IPI00152505;IPI00607720;IPI00816836	IPI00003909	7;6;6;6;5;1;1;1;1;1	7;6;6;6;5;1;1;1;1;1	7;6;6;6;5;1;1;1;1;1	Glucose transporter type 3, brain;Solute carrier family 2, facilitated glucose transporter member 3;cDNA FLJ57557, highly similar to Solute carrier family 2, facilitated glucose transporter member 3;cDNA FLJ58410, highly similar to Solute carrier family 2, facilitated glucosetransporter member 3;cDNA FLJ56136, highly similar to Solute carrier family 2, facilitated glucosetransporter member 14;cDN…	GLUT3;SLC2A3;GLUT14;SLC2A14	Solute carrier family 2, facilitated glucose transporter member 3;cDNA FLJ56136, highly similar to Solute carrier family 2, facilitated glucosetransporter member 14;Isoform 1 of Solute carrier family 2, facilitated glucose transporter member 14;Isoform 2 o	P11169;B7Z5A7;B7Z966;B7Z5J8;B7ZAC3;Q8TDB8-1;Q8TDB8;Q8TDB8-2;B7Z844;Q59F54	10	7	7	7	7	7	7	6	7	7	7	6	7	7	7	6	12.9	12.9	12.9	53.924	496	7	7	7	6	3.5e-72	36185000	16468000	10525000	6667500	2524100	22894000	13079000	5279100	3134900	4
44	1828;1946;2153;2886			IPI00004845;IPI00020035	IPI00004845	IPI00004845	4;1	4;1	4;1	Protein NipSnap homolog 3A;Protein NipSnap homolog 4;Target for Salmonella secreted protein C;cDNA FLJ58863, highly similar to Protein NipSnap3A	HSPC299;NIPSNAP3A;NIPSNAP4	Protein NipSnap homolog 3A	Q9UFN0;B4DW81	2	4	4	4	4	4	3	3	4	4	3	3	4	4	3	3	19.4	19.4	19.4	28.466	247	4	5	4	4	8.25e-15	2898900	1250100	751030	594060	303730	2121600	586680	487850	377760	4
47	208;1407;1999;2102;2791			IPI00005160;IPI00737530;IPI00927418;IPI00925033;IPI00924615;IPI00927612;IPI00927861;IPI00927206;IPI00925248	IPI00005160;IPI00737530	IPI00005160	5;5;2;2;2;2;2;2;1	5;5;2;2;2;2;2;2;1	5;5;2;2;2;2;2;2;1	Actin-related protein 2/3 complex subunit 1B;Arp2/3 complex 41 kDa subunit;p41-ARC;Actin related protein 2/3 complex, subunit 1B, 41kDa;Actin related protein 2/3 complex, subunit 1B, 41kDa, isoform CRA_a;cDNA, FLJ95695, Homo sapiens actin related protein 2/3 complex, subunit 1B, 41kDa(ARPC1B), mRNA	ARC41;ARPC1B;hCG_19475;tcag7.662	Actin-related protein 2/3 complex subunit 1B;similar to actin related protein 2/3 complex subunit 1B	O15143;A4D275	9	5	5	5	5	5	4	4	5	5	4	4	5	5	4	4	13.4	13.4	13.4	40.949	372	5	5	4	4	1.24e-49	6367700	1864300	1581200	1907400	1014800	2051700	1905100	2118300	1777700	4
48	403;437;450;1234;1927;2378;2858;3159			IPI00005161;IPI00000477;IPI00927156;IPI00925920;IPI00926315;IPI00925705	IPI00005161;IPI00000477	IPI00005161	8;4;2;2;2;2	8;4;2;2;2;2	8;4;2;2;2;2	Actin-related protein 2/3 complex subunit 2;Arp2/3 complex 34 kDa subunit;Actin related protein 2/3 complex, subunit 2, 34kDa, isoform CRA_a;cDNA FLJ76076, highly similar to Homo sapiens actin related protein 2/3 complex, subunit 2, 34kDa (ARPC2), transcript variant 2, mRNA;Putative uncharacterized protein ARPC2;PNAS-139	ARC34;ARPC2;PRO2446;hCG_16304	Actin-related protein 2/3 complex subunit 2;PNAS-139	O15144;Q53R19;Q9BXV5	6	8	8	8	8	8	7	8	8	8	7	8	8	8	7	8	35	35	35	34.333	300	10	9	8	9	1.1e-52	11175000	3315400	2632800	2831600	2395500	4223100	3339400	3300800	3252000	4
50	378;1866			IPI00005614;IPI00328230;IPI00333015	IPI00005614;IPI00328230;IPI00333015	IPI00005614	2;2;2	2;2;2	2;2;2	Beta-II spectrin;Fodrin beta chain;Spectrin beta chain, brain 1;Spectrin, non-erythroid beta chain 1;Spectrin beta non-erythrocytic 1;Spectrin, beta, non-erythrocytic 1, isoform CRA_d;cDNA FLJ55845, highly similar to Spectrin beta chain, brain 1;Spectrin, beta, non-erythrocytic 1, isoform CRA_c;Putative uncharacterized protein SPTBN1;Beta II spectrin-short isoform	SPTB2;SPTBN1;hCG_17370	Isoform Long of Spectrin beta chain, brain 1;Isoform Short of Spectrin beta chain, brain 1;Isoform 2 of Spectrin beta chain, brain 1	Q01082-1;Q01082;B2ZZ89;B4DIF8;Q01082-2;Q53RC4;Q01082-3;B2RP63;Q8WYB3	3	2	2	2	2	2	2	2	2	2	2	2	2	2	2	2	0.9	0.9	0.9	274.61	2364	2	2	2	2	8.44e-09	143520	50290	35843	46239	11150	87751	52951	24595	6472.4	4
51	1014;2502			IPI00005737;IPI00399142;IPI00641719;IPI00922295;IPI00922900	IPI00005737;IPI00399142;IPI00641719;IPI00922295;IPI00922900	IPI00005737	2;2;2;1;1	2;2;2;1;1	2;2;2;1;1	Surfeit locus protein 4;cDNA FLJ50444, highly similar to Surfeit locus protein 4;cDNA FLJ61766, highly similar to Surfeit locus protein 4;cDNA, FLJ79379, highly similar to Surfeit locus protein 4;Surfeit 4, isoform CRA_b;cDNA FLJ50722, highly similar to Surfeit locus protein 4;cDNA FLJ53587, highly similar to Surfeit locus protein 4;Surfeit 4;cDNA FLJ53092, moderately similar to Surfeit locus pro…	SURF4;SURF-4;hCG_28148;RP11-244N20.4-002;RP11-244N20.4-004	Isoform 1 of Surfeit locus protein 4;Surfeit 4;Surfeit 4;cDNA FLJ53092, moderately similar to Surfeit locus protein 4;Surfeit 4, isoform CRA_c	O15260-1;O15260;B7Z1G8;B7Z7A8;B7Z8F3;Q5T8U7;O15260-2;Q5T8U5;B7Z605;B7Z6A4	5	2	2	2	2	2	2	2	2	2	2	2	2	2	2	2	10.4	10.4	10.4	30.394	269	2	3	2	2	4.61e-22	1122300	418700	357550	229240	116790	713710	411760	155970	108550	4
53	5;507;1658			IPI00005969;IPI00873484;IPI00026182;IPI00873113;IPI00852796;IPI00952611;IPI00853571	IPI00005969;IPI00873484	IPI00005969	3;2;1;1;1;1;1	3;2;1;1;1;1;1	3;2;1;1;1;1;1	CapZ alpha-1;F-actin-capping protein subunit alpha-1;cDNA FLJ75422, highly similar to Homo sapiens capping protein (actin filament) muscle Z-line, alpha 1, mRNA	CAPZA1	F-actin-capping protein subunit alpha-1;Putative uncharacterized protein CAPZA1 (Fragment)	P52907;A8K0T9;A8MV55	7	3	3	3	3	2	2	2	3	2	2	2	3	2	2	2	12.9	12.9	12.9	32.922	286	3	2	2	2	9.02e-28	2759300	609500	559940	1008400	581490	767580	688790	965800	985540	4
54	1820			IPI00006091;IPI00472316;IPI00304639;IPI00375141;IPI00304638;IPI00220577	IPI00006091;IPI00472316;IPI00304639;IPI00375141;IPI00304638;IPI00220577	IPI00006091	1;1;1;1;1;1	1;1;1;1;1;1	1;1;1;1;1;1	Dystrophin;DMD protein;Duchenne muscular dystrophy gene;Duchenne muscular dystrophy protein	DMD;GS1-19O24.1-006;GS1-19O24.1-002;GS1-19O24.1-004	Isoform 4 of Dystrophin;dystrophin Dp427p1 isoform;dystrophin Dp427c isoform;dystrophin Dp427l isoform;Isoform 1 of Dystrophin;Isoform 2 of Dystrophin	P11532-1;P11532;B1AK23;Q548X2;Q7KZ40;Q8WYE3;Q8WYE4;Q8WYE5;Q8WYE6;Q8WYE7;Q8WYE8;Q8WYE9;Q8WYF0;Q8WYF1;Q8WYF2;Q8WYF5;Q9UMG1;Q9UPB5;P11532-4;Q4G0X0;Q6PK12;Q8WYE2;Q8WYD8;Q8WYD9;Q8WYE0;Q8WYE1;Q9UEH4;Q9UPB4;P11532-2;P11532-3;Q14172;Q8WYC7;Q8WYC8;Q8WYC9;Q8WYD0;Q8WYD2;Q8WYD3;Q8WYD4;Q8WYD5;Q8WYD6;Q8WYD7;Q9UME2;Q9UMK8	6	1	1	1	1	1	1	1	1	1	1	1	1	1	1	1	0.3	0.3	0.3	426.69	3685	1	1	1	1	0.00038425	2775600	364350	183730	1758800	468700	325270	144830	2059000	660270	4
55	1069;1561			IPI00006173;IPI00641481	IPI00006173;IPI00641481	IPI00006173	2;2	2;2	2;2	Cholesteryl ester transfer protein;Lipid transfer protein I;cDNA FLJ76868, highly similar to Homo sapiens cholesteryl ester transfer protein, plasma (CETP), mRNA;cDNA FLJ57826, moderately similar to Cholesteryl ester transfer protein;Cholesteryl ester transfer protein, plasma	CETP	Isoform 1 of Cholesteryl ester transfer protein;Isoform 2 of Cholesteryl ester transfer protein	P11597-1;P11597;A8K6C1;P11597-2;B4DMZ5;Q5TZS4;Q8IWL9;Q9H4L8	2	2	2	2	2	2	1	2	2	2	1	2	2	2	1	2	5.7	5.7	5.7	54.756	493	2	2	1	2	7.73e-08	512930	110770	194950	69679	137530	94680	299830	76200	207800	4
56	51;138;240;669;786;847;863;927;976;1285;1342;1515;1568;1592;1809;3006	11	363	IPI00006510;CON__ENSEMBL:ENSBTAP00000025008	IPI00006510	IPI00006510	16;4	16;4	14;2	Tubulin beta-1 chain	TUBB1	Tubulin beta-1 chain	Q9H4B7	2	16	16	14	16	16	15	16	16	16	15	16	14	14	13	14	59	59	54.5	50.326	451	21	20	20	22	1.28e-263	127360000	27977000	33983000	40345000	25051000	33864000	46710000	40822000	37287000	4
57	330;648			IPI00006579;IPI00645361	IPI00006579;IPI00645361	IPI00006579	2;1	2;1	2;1	Cytochrome c oxidase polypeptide IV;Cytochrome c oxidase subunit 4 isoform 1, mitochondrial;Cytochrome c oxidase subunit IV isoform 1;COX4I1 protein	COX4;COX4I1	Cytochrome c oxidase subunit 4 isoform 1, mitochondrial;COX4I1 protein	P13073;Q6P666;Q86WV2	2	2	2	2	2	2	2	2	2	2	2	2	2	2	2	2	11.2	11.2	11.2	19.576	169	2	2	2	2	3.74e-07	1665700	728050	511360	309950	116350	1043100	628870	255430	117860	4
58	2266			IPI00006608;IPI00412681;IPI00412924;IPI00952639;IPI00219187;IPI00914602;IPI00219186;IPI00219185;IPI00412568;IPI00219183;IPI00394658;IPI00909502	IPI00006608;IPI00412681;IPI00412924;IPI00952639;IPI00219187;IPI00914602;IPI00219186;IPI00219185;IPI00412568;IPI00219183;IPI00394658;IPI00909502	IPI00006608	1;1;1;1;1;1;1;1;1;1;1;1	1;1;1;1;1;1;1;1;1;1;1;1	1;1;1;1;1;1;1;1;1;1;1;1	ABPP;Alzheimer disease amyloid protein;Amyloid beta A4 protein;Amyloid intracellular domain 50;Amyloid intracellular domain 57;Amyloid intracellular domain 59;APPI;Beta-amyloid protein 40;Beta-amyloid protein 42;Beta-APP40;Beta-APP42;C31;C80;C83;C99;Cerebral vascular amyloid peptide;Gamma-CTF(50);Gamma-CTF(57);Gamma-CTF(59);Gamma-secretase C-terminal fragment 50;Gamma-secretase C-terminal fragmen…	A4;AD1;APP	Isoform APP770 of Amyloid beta A4 protein (Fragment);Isoform L-APP752 of Amyloid beta A4 protein (Fragment);Isoform APP751 of Amyloid beta A4 protein (Fragment);cDNA FLJ50531, highly similar to Amyloid beta A4 protein;Isoform L-APP733 of Amyloid beta A4 pr	P05067-1;P05067;P05067-9;B4DM00;C9J740;P05067-8;B4DII8;C9JHU0;P05067-7;B4DGD0;P05067-6;C9J0K4;P05067-5;P05067-4;B4DJT9;B4DQM1;P05067-3;P05067-10;B4DMD5;B7Z313;Q9BYY9	12	1	1	1	1	1	0	1	1	1	0	1	1	1	0	1	1.3	1.3	1.3	86.942	770	1	1		1	0.02255	219830	107340	82674	0	29813	144100	109460	0	32061	3
62	678			IPI00007118;IPI00926949	IPI00007118;IPI00926949	IPI00007118	1;1	1;1	1;1	Endothelial plasminogen activator inhibitor;Plasminogen activator inhibitor 1;Serpin E1;cDNA FLJ61097, highly similar to Plasminogen activator inhibitor 1;cDNA FLJ53064, highly similar to Plasminogen activator inhibitor 1;cDNA FLJ51012, highly similar to Plasminogen activator inhibitor 1;cDNA, FLJ79124, highly similar to Plasminogen activator inhibitor 1;Putative uncharacterized protein SERPINE1	PAI1;PLANH1;SERPINE1	Plasminogen activator inhibitor 1;plasminogen activator inhibitor-1 isoform 2 precursor	P05121;B7Z1D9;B7Z4S0;B7Z4X6;B7ZAB0;C9J272	2	1	1	1	1	1	1	1	1	1	1	1	1	1	1	1	5	5	5	45.059	402	1	1	1	1	0.039887	227780	55377	47974	73151	51276	63364	58052	77064	86385	4
64	304;640;869;989;1661;2228;2620;3158;3279			IPI00007188;IPI00022891;IPI00010420;IPI00556601;IPI00455148	IPI00007188	IPI00007188	9;4;1;1;1	9;4;1;1;1	3;0;0;0;0	Adenine nucleotide translocator 2;ADP,ATP carrier protein 2;ADP,ATP carrier protein, fibroblast isoform;ADP/ATP translocase 2;Solute carrier family 25 member 5;cDNA, FLJ96310, highly similar to Homo sapiens solute carrier family 25 (mitochondrial carrier; adenine nucleotide translocator), member 5 (SLC25A5), mRNA;SLC25A5 protein	ANT2;SLC25A5	ADP/ATP translocase 2	P05141;B2RCV1;Q6NVC0	5	9	9	3	9	9	8	7	9	9	8	7	3	3	3	2	29.5	29.5	11.1	32.895	298	10	10	9	8	2.21e-32	16775000	7198600	5495800	2850000	1230200	9790900	7188000	2232200	1499900	4
65	147;895;2922			IPI00007280;IPI00550234;IPI00640779;IPI00903330	IPI00007280;IPI00550234;IPI00640779;IPI00903330	IPI00007280	3;3;2;2	3;3;2;2	3;3;2;2	Actin-related protein 2/3 complex subunit 5;Arp2/3 complex 16 kDa subunit	ARC16;ARPC5;RP1-127C7.3-004	Isoform 2 of Actin-related protein 2/3 complex subunit 5;Isoform 1 of Actin-related protein 2/3 complex subunit 5;Actin-related protein 2/3 complex subunit 5;Actin-related protein 2/3 complex subunit 5	O15511-2;O15511;O15511-1;B1ALC0;B3KTE1	4	3	3	3	3	3	3	3	3	3	3	3	3	3	3	3	24	24	24	16.631	154	3	3	3	3	3.18e-12	6006600	1517700	1335200	1908800	1244900	1831900	1673700	1996300	1979300	4
66	255;708;1902;1904;2369;2739	12	1	IPI00007426;IPI00908696;IPI00909717;IPI00945943;IPI00946721;IPI00946450	IPI00007426;IPI00908696;IPI00909717;IPI00945943;IPI00946721;IPI00946450	IPI00007426	6;6;3;3;3;3	6;6;3;3;3;3	6;6;3;3;3;3	ADP-ribosylation factor-like protein 6-interacting protein 5;Cytoskeleton-related vitamin A-responsive protein;Dermal papilla-derived protein 11;Glutamate transporter EAAC1-interacting protein;GTRAP3-18;JM5;PRA1 family protein 3;Prenylated Rab acceptor protein 2;Protein JWa;Putative MAPK-activating protein PM27;cDNA FLJ90131 fis, clone HEMBB1000447, highly similar to PRA1 family protein 3;cDNA FL…	ARL6IP5;DERP11;HSPC127;JWA;PRA2;PRAF3	PRA1 family protein 3;cDNA FLJ52128, highly similar to PRA1 family protein 3;cDNA FLJ51702, moderately similar to PRA1 family protein 3;Putative uncharacterized protein ARL6IP5;Putative uncharacterized protein ARL6IP5;Putative uncharacterized protein ARL6I	O75915;B2R6V5;B3KQB4;B4DZZ0;B4DWQ6;C9JVC5;C9JQU6;C9JZ39	6	6	6	6	6	6	5	6	6	6	5	6	6	6	5	6	28.7	28.7	28.7	21.614	188	8	8	6	8	1.61e-53	16055000	7256900	5134600	2257400	1405800	9646700	6595500	2250200	1505100	4
67	1851;2431;2618;3136			IPI00007611;IPI00893479;IPI00853134	IPI00007611;IPI00893479	IPI00007611	4;2;1	4;2;1	4;2;1	ATP synthase subunit O, mitochondrial;Oligomycin sensitivity conferral protein;ATP synthase	ATP5O;ATPO	ATP synthase subunit O, mitochondrial;Putative uncharacterized protein ATP5O	P48047;Q53HH2;C9JV90	3	4	4	4	4	4	4	3	4	4	4	3	4	4	4	3	22.1	22.1	22.1	23.277	213	4	4	4	3	6.13e-10	3446600	1415200	1105400	691160	234870	1954900	1607300	410810	250930	4
69	52;236;469;572;714;718;1227;1521;1616;2045;2243;2244;2874			IPI00007750;IPI00794663;IPI00335314;IPI00794009;IPI00916823;IPI00916391;IPI00797717;IPI00917863;IPI00015671;IPI00872463;IPI00879904;IPI00942772;IPI00017454;IPI00879535;IPI00853556	IPI00007750;IPI00794663	IPI00007750	13;13;6;4;4;4;4;3;2;2;2;2;2;2;2	3;3;2;2;2;0;2;1;0;0;0;0;0;0;0	3;3;2;2;2;0;2;1;0;0;0;0;0;0;0	Alpha-tubulin 1;Testis-specific alpha-tubulin;Tubulin alpha-1 chain;Tubulin alpha-4A chain;Tubulin H2-alpha;cDNA FLJ58687, highly similar to Tubulin alpha-4 chain;Putative uncharacterized protein TUBA4A;Tubulin, alpha 1 (Testis specific), isoform CRA_a	TUBA1;TUBA4A;hCG_2013418	Tubulin alpha-4A chain;Tubulin, alpha 1 (Testis specific), isoform CRA_a	P68366;A8MUB1	15	13	3	3	13	12	13	13	3	3	3	3	3	3	3	3	39.5	7.6	7.6	49.924	448	3	3	3	3	2.49e-157	12666000	2924200	3726700	3679800	2334800	3525800	5049700	3848100	3400100	4
71	15;75;267;616;672;1419;1449;1563;1582;1753;2151;2535;2843;2983			IPI00008274;IPI00639931;IPI00646869;IPI00644589;IPI00641881;IPI00647351;IPI00645789;IPI00644109;IPI00646269;IPI00642414;IPI00027342;IPI00922569;IPI00945887;IPI00552929;IPI00922216;IPI00922040;IPI00514858;IPI00954082	IPI00008274;IPI00639931;IPI00646869;IPI00644589;IPI00641881;IPI00647351	IPI00008274	14;13;7;7;7;7;6;6;6;6;1;1;1;1;1;1;1;1	14;13;7;7;7;7;6;6;6;6;1;1;1;1;1;1;1;1	2;1;2;2;2;2;1;2;2;2;0;0;0;0;0;0;0;0	Adenylyl cyclase-associated protein 1;Adenylyl cyclase-associated protein	CAP;CAP1;RP11-115D7.1-018;RP11-115D7.1-011;RP11-115D7.1-008;RP11-115D7.1-017	Isoform 1 of Adenylyl cyclase-associated protein 1;Isoform 2 of Adenylyl cyclase-associated protein 1;Adenylyl cyclase-associated protein;Adenylyl cyclase-associated protein;Adenylyl cyclase-associated protein;Adenylyl cyclase-associated protein	Q01518-1;Q01518;B2RDY9;B4DI38;B4DNW7;B4DNY3;Q01518-2;Q5T0R1;Q5T0R2;Q5T0R3;Q5T0R4	18	14	14	2	14	14	14	14	14	14	14	14	2	2	2	2	41.1	41.1	7.6	51.855	475	17	17	17	17	7.48e-156	26434000	5700500	4293000	10216000	6224400	6869900	5678200	10394000	9736900	4
72	1883			IPI00008569;IPI00927850;IPI00909691	IPI00008569;IPI00927850;IPI00909691	IPI00008569	1;1;1	1;1;1	1;1;1	Synaptobrevin homolog YKT6;cDNA, FLJ93006, Homo sapiens SNARE protein Ykt6 (YKT6), mRNA;SNARE protein Ykt6;SNARE protein Ykt6, isoform CRA_a;YKT6 v-SNARE protein;cDNA FLJ50174, highly similar to Homo sapiens SNARE protein Ykt6 (YKT6), mRNA	YKT6;hCG_18297;tcag7.798	Synaptobrevin homolog YKT6;Putative uncharacterized protein YKT6;cDNA FLJ50174, highly similar to Homo sapiens SNARE protein Ykt6 (YKT6), mRNA	O15498;A4D2J0;B5BU81;Q9UES0;C9J742;B4DR94	3	1	1	1	0	0	0	1	0	0	0	1	0	0	0	1	4.5	4.5	4.5	22.417	198				1	0.085322	733930	0	0	0	733930	0	0	0	1173700	1
74	536;1655;1922;1945;1996;2303;2356;2688			IPI00008964;IPI00896425;IPI00374519;IPI00005719;IPI00917079;IPI00937805;IPI00922662;IPI00334174;IPI00022134;IPI00185217;IPI00394882;IPI00383449;IPI00903040;IPI00789827	IPI00008964;IPI00896425;IPI00374519;IPI00005719;IPI00917079;IPI00937805;IPI00922662;IPI00334174	IPI00008964	8;8;6;5;5;4;4;4;3;3;1;1;1;1	8;8;6;5;5;4;4;4;3;3;1;1;1;1	7;7;5;4;4;3;3;3;2;2;0;0;0;0	Ras-related protein Rab-1B;Small GTP-binding protein;RAB1B protein;Putative Ras-related protein Rab-1C;Ras-related protein Rab-1A;YPT1-related protein;cDNA, FLJ96558, Homo sapiens RAB1A, member RAS oncogene family (RAB1A), mRNA;RAB1A protein;RAB1A, member RAS oncogene family;RAB1A, member RAS oncogene family, isoform CRA_b;cDNA FLJ57768, highly similar to Ras-related protein Rab-1A;GTP binding pr…	RAB1B;rab1b;RAB1C;RAB1;RAB1A;hCG_22592	Ras-related protein Rab-1B;RAB1B protein;Putative Ras-related protein Rab-1C;Isoform 1 of Ras-related protein Rab-1A;19 kDa protein;23 kDa protein;cDNA FLJ57768, highly similar to Ras-related protein Rab-1A;Isoform 2 of Ras-related protein Rab-1A	Q9H0U4;Q92927;Q6FIG4;Q92928;P62820-1;P62820;Q5U0I6;B7Z8M7;P62820-2;Q96RD8	14	8	8	7	8	8	5	8	8	8	5	8	7	7	4	7	42.8	42.8	37.3	22.171	201	9	10	6	10	3.27e-82	17668000	5975100	5234800	3848500	2610000	7409700	6820500	4213700	3650800	4
77	1950			IPI00009457;IPI00169302;IPI00796272	IPI00009457;IPI00169302;IPI00796272	IPI00009457	1;1;1	1;1;1	1;1;1	C-type lectin domain family 1 member B;C-type lectin-like receptor 2;Putative uncharacterized protein CLEC1B	CLEC1B;CLEC2;UNQ721/PRO1384	Isoform 1 of C-type lectin domain family 1 member B;Isoform 2 of C-type lectin domain family 1 member B;Putative uncharacterized protein CLEC1B	Q9P126-1;Q9P126;Q9P126-2;C9J7A8	3	1	1	1	1	1	0	1	1	1	0	1	1	1	0	1	5.7	5.7	5.7	26.595	229	1	1		1	1.53e-09	385750	229700	124100	0	31955	322070	143740	0	25403	3
78	1268;2985			IPI00009477;IPI00790846	IPI00009477;IPI00790846	IPI00009477	2;1	2;1	2;1	Intercellular adhesion molecule 2;cDNA FLJ76426, highly similar to Homo sapiens intercellular adhesion molecule 2 (ICAM2), mRNA;Intercellular adhesion molecule 2 variant;ICAM2 protein;Intercellular adhesion molecule 2, isoform CRA_a;cDNA FLJ51691, highly similar to Intercellular adhesion molecule 2	ICAM2;hCG_41817	Intercellular adhesion molecule 2;cDNA FLJ51691, highly similar to Intercellular adhesion molecule 2	P13598;A8KAP5;Q59ED3;Q6FHE2;B7Z316;Q9NZC6	2	2	2	2	2	2	1	1	2	2	1	1	2	2	1	1	9.5	9.5	9.5	30.654	275	3	3	2	2	1.18e-09	903050	563240	280930	39881	18998	580730	210500	193230	134440	4
81	2191			IPI00009792;IPI00786926	IPI00009792;IPI00786926	IPI00009792	1;1	1;1	1;1	Ig heavy chain V-I region V35;Myosin-reactive immunoglobulin heavy chain variable region		Ig heavy chain V-I region V35;Myosin-reactive immunoglobulin heavy chain variable region (Fragment)	P23083;C9JZH3;Q9UL89	2	1	1	1	1	1	1	1	1	1	1	1	1	1	1	1	10.3	10.3	10.3	13.009	117	1	1	1	1	0.013705	1787900	81102	85951	1305000	315870	19202	21998	1880500	98874	4
84	2761			IPI00009960;IPI00554469;IPI00470829;IPI00926611;IPI00910079;IPI00940432;IPI00925553	IPI00009960;IPI00554469;IPI00470829;IPI00926611;IPI00910079;IPI00940432;IPI00925553	IPI00009960	1;1;1;1;1;1;1	1;1;1;1;1;1;1	1;1;1;1;1;1;1	Cell proliferation-inducing gene 4/52 protein;Mitochondrial inner membrane protein;Mitofilin;p87/89;cDNA, FLJ92546, highly similar to Homo sapiens inner membrane protein, mitochondrial (mitofilin) (IMMT), mRNA;cDNA FLJ51884, highly similar to Mitochondrial inner membrane protein;cDNA FLJ54290, highly similar to Mitochondrial inner membrane protein;cDNA FLJ59388, highly similar to Mitochondrial in…	HMP;IMMT;PIG4;PIG52	Isoform 1 of Mitochondrial inner membrane protein;Isoform 2 of Mitochondrial inner membrane protein;Isoform 3 of Mitochondrial inner membrane protein;Putative uncharacterized protein IMMT;Putative uncharacterized protein IMMT;inner membrane protein, mitoch	Q16891-1;Q16891;B2R5N6;Q16891-2;B4DKR1;B4DS66;Q16891-3;B4DQY2;B9A067;B4DT20;B8ZZQ7;C9J406;C9JJ24	7	1	1	1	1	0	0	0	1	0	0	0	1	0	0	0	2.5	2.5	2.5	83.677	758	1				0.031635	119720	119720	0	0	0	144820	0	0	0	1
85	274;987;1279;1474;3154;3268			IPI00010133;IPI00642725;IPI00446617	IPI00010133;IPI00642725	IPI00010133	6;6;1	5;5;1	5;5;1	Coronin-1A;Coronin-like protein A;Coronin-like protein p57;Tryptophan aspartate-containing coat protein	CORO1;CORO1A	Coronin-1A;40 kDa protein	P31146	3	6	5	5	6	6	6	6	5	5	5	5	5	5	5	5	19.5	18	18	51.026	461	5	5	5	5	1.42e-35	5858400	639960	772540	2565300	1880600	569590	839550	2707300	3240500	4
88	79;1195;1262;1900;2687			IPI00010438;IPI00216231;IPI00795000;IPI00794966;IPI00796942;IPI00794436	IPI00010438;IPI00216231;IPI00795000;IPI00794966;IPI00796942	IPI00010438	5;5;5;5;5;1	5;5;5;5;5;1	5;5;5;5;5;1	Synaptosomal-associated protein 23;Vesicle-membrane fusion protein SNAP-23;Synaptosomal-associated protein	SNAP23;hCG_40424	Isoform SNAP-23a of Synaptosomal-associated protein 23;Isoform SNAP-23b of Synaptosomal-associated protein 23;14 kDa protein;14 kDa protein;12 kDa protein	O00161-1;O00161;A8K287;O00161-2	6	5	5	5	4	5	4	4	4	5	4	4	4	5	4	4	28	28	28	23.354	211	4	5	4	4	1.16e-21	3728300	1616800	1405200	375170	331130	2404400	1619000	373740	300670	4
90	233;757;1626;2496;2767;2883;3168			IPI00010491;IPI00643312;IPI00016381;IPI00219858	IPI00010491;IPI00643312	IPI00010491	7;4;2;2	7;4;2;2	7;4;2;2	C25KG;Ras-related protein Rab-27B	RAB27B	Ras-related protein Rab-27B;10 kDa protein	O00194	4	7	7	7	7	7	7	7	7	7	7	7	7	7	7	7	35.3	35.3	35.3	24.608	218	7	7	7	7	6.39e-46	17605000	6659400	5802300	3301600	1841600	8464400	8403400	2788500	2232500	4
91	24;46;196;302;439;821;825;1549;2387;2530;2603;3106;3234			IPI00010697;IPI00216225;IPI00921401;IPI00216222;IPI00216223;IPI00216224;IPI00216221;IPI00921080;IPI00915974;IPI00917593	IPI00010697;IPI00216225;IPI00921401;IPI00216222;IPI00216223;IPI00216224;IPI00216221;IPI00921080	IPI00010697	13;13;13;13;13;13;13;12;3;2	13;13;13;13;13;13;13;12;3;2	13;13;13;13;13;13;13;12;3;2	CD49 antigen-like family member F;Integrin alpha-6;Integrin alpha-6 heavy chain;Integrin alpha-6 light chain;VLA-6;Putative uncharacterized protein ITGA6	ITGA6	Isoform Alpha-6X1X2B of Integrin alpha-6;Isoform Alpha-6X1X2A of Integrin alpha-6;Isoform 9 of Integrin alpha-6;Isoform Alpha-6X1B of Integrin alpha-6;Putative uncharacterized protein ITGA6;Isoform Alpha-6X2B of Integrin alpha-6;Isoform Alpha-6X1A of Integ	P23229-1;P23229;P23229-6;P23229-9;P23229-3;P23229-4;C9JK10;P23229-5;P23229-2;P23229-7	10	13	13	13	13	13	12	11	13	13	12	11	13	13	12	11	13	13	13	126.63	1130	13	13	12	11	2.74e-29	10006000	3833800	3206200	2259800	706290	5197000	4171000	1917500	933520	4
92	30;35;64;517;1104;1311;1316;1317;1443;1455;1456;1834;1835;2334;2335;3222			IPI00010779;IPI00216975;IPI00910322;IPI00909308;IPI00941379	IPI00010779;IPI00216975;IPI00910322	IPI00010779	16;13;10;4;1	16;13;10;4;1	8;5;5;0;0	TM30p1;Tropomyosin alpha-4 chain;Tropomyosin-4;cDNA FLJ54184, highly similar to Tropomyosin alpha-4 chain;cDNA FLJ52936, weakly similar to Tropomyosin alpha-4 chain	TPM4	Isoform 1 of Tropomyosin alpha-4 chain;Isoform 2 of Tropomyosin alpha-4 chain;cDNA FLJ52936, weakly similar to Tropomyosin alpha-4 chain	P67936-1;P67936;B4DVY2;P67936-2;B4DTB1	5	16	16	8	16	16	14	16	16	16	14	16	8	8	7	8	40.3	40.3	28.2	28.521	248	17	17	16	18	1.31e-110	120690000	36081000	27238000	33247000	24123000	47922000	34876000	31573000	36712000	4
93	489;624;1252;1254;2009;2204;2508;2655;3183			IPI00010796;IPI00878551;IPI00879437;IPI00911004	IPI00010796;IPI00878551;IPI00879437	IPI00010796	9;7;5;1	9;7;5;1	9;7;5;1	Cellular thyroid hormone-binding protein;p55;Prolyl 4-hydroxylase subunit beta;Protein disulfide-isomerase;cDNA FLJ56766, highly similar to Protein disulfide-isomerase (EC5.3.4.1);cDNA FLJ59361, highly similar to Protein disulfide-isomerase (EC 5.3.4.1);cDNA FLJ38619 fis, clone HEART2007696, highly similar to Protein disulfide-isomerase (EC 5.3.4.1);cDNA FLJ45462 fis, clone BRSTN2011961, highly s…	ERBA2L;P4HB;PDI;PDIA1;PO4DB;hCG_95895	Protein disulfide-isomerase;cDNA FLJ59430, highly similar to Protein disulfide-isomerase;Putative uncharacterized protein P4HB	P07237;B2RDQ2;B4DJS0;B4DNL5;B3KTQ9;B4DLN6;B4DUA5;Q96C96;C9JKT0	4	9	9	9	8	8	7	8	8	8	7	8	8	8	7	8	25.4	25.4	25.4	57.116	508	8	8	7	8	9.49e-54	6004200	1355400	1284300	1970200	1394300	1461000	1440900	2495800	2121000	4
94	406;2944			IPI00010810;IPI00895865;IPI00792673	IPI00010810;IPI00895865;IPI00792673	IPI00010810	2;2;1	2;2;1	2;2;1	Electron transfer flavoprotein subunit alpha, mitochondrial;cDNA FLJ76486, highly similar to Homo sapiens electron-transfer-flavoprotein, alpha polypeptide (glutaric aciduria II) (ETFA), nuclear gene encoding mitochondrial protein, mRNA;Electron transfer flavoprotein alpha-subunit;Electron-transfer-flavoprotein, alpha polypeptide;Electron-transfer-flavoprotein, alpha polypeptide (Glutaric aciduri…	ETFA;hCG_39414	Electron transfer flavoprotein subunit alpha, mitochondrial;electron transfer flavoprotein, alpha polypeptide isoform b;24 kDa protein	P13804;Q53XN3;B4DT43	3	2	2	2	2	2	2	2	2	2	2	2	2	2	2	2	9	9	9	35.079	333	2	2	2	2	9.34e-06	436340	155620	129810	101410	49510	228540	191550	61203	57258	4
95	28;809;907;1071;1562;1886;2098;3201			IPI00010896;IPI00877596;IPI00027193;IPI00001960;IPI00294443;IPI00221328;IPI00514835;IPI00903323;IPI00853014;IPI00384724	IPI00010896	IPI00010896	8;2;1;1;1;1;1;1;1;1	8;2;1;1;1;1;1;1;1;1	8;2;1;1;1;1;1;1;1;1	Chloride channel ABP;Chloride intracellular channel protein 1;Nuclear chloride ion channel 27;Regulatory nuclear chloride ion channel protein;Chloride intracellular channel 1 variant;cDNA, FLJ94671, Homo sapiens chloride intracellular channel 1 (CLIC1), mRNA;Chloride intracellular channel 1	CLIC1;NCC27;DADB-110M10.1-001;DAMA-236L13.3-001;DAMC-117B11.2-001;DAQB-350E15.4-001;DASS-312M4.8-001;XXbac-BCX88C14.3-001	Chloride intracellular channel protein 1	O00299;Q53FB0;Q5SRT3	10	8	8	8	7	7	8	8	7	7	8	8	7	7	8	8	35.3	35.3	35.3	26.922	241	7	7	8	9	2.78e-69	11210000	1316000	1357400	5127200	3409600	1358700	1412700	5759600	5415500	4
97	338;426;949;1019;1244;1605;1614;1686;2180;2673;2809;3152;3153			IPI00011107;IPI00953980	IPI00011107;IPI00953980	IPI00011107	13;9	13;9	13;9	ICD-M;IDP;Isocitrate dehydrogenase [NADP], mitochondrial;NADP(+)-specific ICDH;Oxalosuccinate decarboxylase;cDNA FLJ50469, highly similar to Isocitrate dehydrogenase;cDNA, FLJ79287, highly similar to Isocitrate dehydrogenase;cDNA FLJ50654, highly similar to Isocitrate dehydrogenase;Isocitrate dehydrogenase 2 (NADP+), mitochondrial variant;Isocitrate dehydrogenase	IDH2	Isocitrate dehydrogenase [NADP], mitochondrial;Isocitrate dehydrogenase	P48735;B4DFL2;B4DSZ6;Q53GL5;Q13584	2	13	13	13	13	13	11	13	13	13	11	13	13	13	11	13	30.1	30.1	30.1	50.909	452	15	15	12	15	3.23e-126	26682000	10651000	9014300	4387700	2628700	14356000	12009000	3790900	3105600	4
99	951;1263			IPI00011201;IPI00643577;IPI00640765	IPI00011201;IPI00643577;IPI00640765	IPI00011201	2;2;1	2;2;1	2;2;1	Malic enzyme 2;NAD-dependent malic enzyme, mitochondrial;Malic enzyme	ME2;hCG_23687	NAD-dependent malic enzyme, mitochondrial;Malic enzyme;15 kDa protein	P23368;B2R8J2;Q9BWL6	3	2	2	2	2	2	1	1	2	2	1	1	2	2	1	1	4.6	4.6	4.6	65.443	584	2	2	1	1	5.06e-13	454040	182780	150160	86791	34308	235170	211770	68715	43437	4
100	388;1581;1822;2134;3192			IPI00011285;IPI00910547;IPI00909108	IPI00011285;IPI00910547	IPI00011285	5;4;1	5;4;1	5;4;1	Calcium-activated neutral proteinase 1;Calpain mu-type;Calpain-1 catalytic subunit;Calpain-1 large subunit;Cell proliferation-inducing gene 30 protein;Micromolar-calpain;cDNA, FLJ96627, highly similar to Homo sapiens calpain 1, (mu/I) large subunit (CAPN1), mRNA;Putative uncharacterized protein CAPN1;cDNA FLJ53224, highly similar to Calpain-1 catalytic subunit (EC 3.4.22.52)	CANPL1;CAPN1;PIG30	Calpain-1 catalytic subunit;Putative uncharacterized protein CAPN1	P07384;B2RDI5;A8MSM1;B4DWH5	3	5	5	5	3	4	4	4	3	4	4	4	3	4	4	4	11.1	11.1	11.1	81.889	714	3	4	4	4	9.9e-37	3779600	638540	808740	1535700	796600	713530	821530	1997400	1107000	4
101	675;1155;1917;2957			IPI00011416;IPI00848328;IPI00908564	IPI00011416;IPI00848328;IPI00908564	IPI00011416	4;2;2	4;2;2	4;2;2	Delta(3,5)-Delta(2,4)-dienoyl-CoA isomerase, mitochondrial;cDNA FLJ57619, highly similar to Delta 3,5-delta 2,4-dienoyl-CoA isomerase, mitochondrial (EC 5.3.3.-)	ECH1	Delta(3,5)-Delta(2,4)-dienoyl-CoA isomerase, mitochondrial;Similar to Delta(3,5)-Delta(2,4)-dienoyl-CoA isomerase, mitochondrial precursor;cDNA FLJ57619, highly similar to Delta 3,5-delta 2,4-dienoyl-CoA isomerase, mitochondrial	Q13011;B4DVS4	3	4	4	4	4	4	2	4	4	4	2	4	4	4	2	4	16.8	16.8	16.8	35.816	328	6	7	3	6	4.93e-14	1235700	494440	471080	107700	162430	737360	499180	187530	157440	4
21	966			IPI00011937;IPI00647280;IPI00938009;IPI00000874;IPI00640741;IPI00639945;IPI00641244	IPI00011937;IPI00647280;IPI00938009;IPI00000874;IPI00640741;IPI00639945;IPI00641244	IPI00011937	1;1;1;1;1;1;1	1;1;1;1;1;1;1	1;1;1;1;1;1;1	Antioxidant enzyme AOE372;Peroxiredoxin IV;Peroxiredoxin-4;Thioredoxin peroxidase AO372;Thioredoxin-dependent peroxide reductase A0372;Putative uncharacterized protein PRDX4;Natural killer cell-enhancing factor A;Peroxiredoxin-1;Proliferation-associated gene protein;Thioredoxin peroxidase 2;Thioredoxin-dependent peroxide reductase 2;cDNA, FLJ92164, highly similar to Homo sapiens peroxiredoxin 1 (…	PRDX4;PAGA;PAGB;PRDX1;TDPX2	Peroxiredoxin-4;Putative uncharacterized protein PRDX4;similar to thioredoxin peroxidase;Peroxiredoxin-1;19 kDa protein;Putative uncharacterized protein PRDX4;11 kDa protein	Q13162;A6NJJ0;Q06830;B2R4P2;B5BU26;C9JLQ6	7	1	1	1	1	1	1	1	1	1	1	1	1	1	1	1	3	3	3	30.54	271	1	1	1	1	0.0028229	959870	252720	203550	332010	171590	318220	262330	327250	270460	4
103	192;520;573;1414;1575;3133			IPI00012011;IPI00413344;IPI00909841	IPI00012011;IPI00413344;IPI00909841	IPI00012011	6;3;3	6;3;3	6;3;3	18 kDa phosphoprotein;Cofilin, non-muscle isoform;Cofilin-1;Cofilin, muscle isoform;Cofilin-2;cDNA, FLJ94864, Homo sapiens cofilin 2 (muscle) (CFL2), mRNA;Cofilin 2 (Muscle), isoform CRA_a;Cofilin 2 (Muscle), isoform CRA_c;Cofilin isoform;cDNA FLJ51435, moderately similar to Cofilin-1	CFL;CFL1;CFL2;hCG_21174	Cofilin-1;Cofilin-2;cDNA FLJ51435, moderately similar to Cofilin-1	P23528;Q9Y281;Q549N0;B4E112	3	6	6	6	6	6	6	6	6	6	6	6	6	6	6	6	44.6	44.6	44.6	18.502	166	7	7	7	7	7.14e-129	32489000	4886600	3604900	16354000	7643800	4564000	3347800	18632000	12658000	4
105	171;413;670;788;806;838;977;1039;1143;1200;1209;1777;1799;1819;1962;1965;2276;2280;2460;2490;2527;2697;2727;2787;3037;3213	13	646	IPI00012269;IPI00745154;IPI00418653;IPI00414668;IPI00395569	IPI00012269	IPI00012269	26;8;1;1;1	26;8;1;1;1	26;8;1;1;1	155 kDa platelet multimerin;Elastin microfibril interface located protein 4;EMILIN-4;Endothelial cell multimerin;Multimerin-1;Platelet glycoprotein Ia*;cDNA FLJ55622, highly similar to Multimerin-1	ECM;EMILIN4;GPIA*;MMRN;MMRN1	Isoform 1 of Multimerin-1	Q13201-1;Q13201;B7Z7R8	5	26	26	26	25	26	24	23	25	26	24	23	25	26	24	23	28.5	28.5	28.5	138.11	1228	31	32	29	29	0	95010000	45914000	27892000	14364000	6840700	65282000	34669000	10638000	6722900	4
106	360			IPI00012426;IPI00477895;IPI00789511	IPI00012426;IPI00477895;IPI00789511	IPI00012426	1;1;1	1;1;1	1;1;1	Retinoid-inducible serine carboxypeptidase;Serine carboxypeptidase 1;cDNA FLJ55993, highly similar to Retinoid-inducible serine carboxypeptidase (EC 3.4.16.-);DC39	MSTP034;RISC;SCP1;SCPEP1;UNQ265/PRO302	Isoform 1 of Retinoid-inducible serine carboxypeptidase;Isoform 2 of Retinoid-inducible serine carboxypeptidase;25 kDa protein	Q9HB40-1;Q9HB40;B4DP22;Q9H2J9;Q9HB40-2	3	1	1	1	1	0	1	1	1	0	1	1	1	0	1	1	3.1	3.1	3.1	50.83	452	1		1	1	0.004709	35434	18042	0	13681	3710.8	30224	0	7822.3	3393	3
107	1612;1676;1925;2419			IPI00012451;IPI00946384	IPI00012451;IPI00946384	IPI00012451	4;2	1;1	1;1	Guanine nucleotide-binding protein subunit beta-4;Transducin beta chain 4;cDNA FLJ77654, highly similar to Homo sapiens guanine nucleotide binding protein (G protein), beta polypeptide 4 (GNB4), mRNA	GNB4	Guanine nucleotide-binding protein subunit beta-4;Putative uncharacterized protein GNB4	Q9HAV0;A8K3F6;C9JRV1	2	4	1	1	4	4	2	4	1	1	0	1	1	1	0	1	12.4	2.1	2.1	37.567	340	1	1		1	1.54e-22	77932	37077	28534	0	12321	57598	28967	0	15298	3
108	1531;1629;1727;1825;1827;2325;2931;2997			IPI00013079;IPI00893443	IPI00013079;IPI00893443	IPI00013079	8;4	8;4	8;4	Elastin microfibril interface-located protein 1;EMILIN-1;EMILIN1 protein	EMI;EMILIN1	EMILIN-1;EMILIN1 protein	Q9Y6C2;Q96IH6	2	8	8	8	7	6	6	6	7	6	6	6	7	6	6	6	11.9	11.9	11.9	106.67	1016	8	7	7	7	3.62e-68	5278200	3141700	1345800	429530	361120	4318300	1892600	167470	188580	4
109	676;871;983;1337;1981;2248;2396;2570;3112;3161			IPI00013219;IPI00921075;IPI00922759	IPI00013219;IPI00921075;IPI00922759	IPI00013219	10;8;8	10;8;8	10;8;8	59 kDa serine/threonine-protein kinase;ILK-1;ILK-2;Integrin-linked protein kinase;p59ILK;cDNA FLJ53825, highly similar to Integrin-linked protein kinase 1 (EC 2.7.11.1);cDNA FLJ50979, moderately similar to Integrin-linked protein kinase (EC 2.7.11.1)	ILK;ILK1;ILK2	Integrin-linked protein kinase;Integrin-linked protein kinase family protein;cDNA FLJ50979, moderately similar to Integrin-linked protein kinase	Q13418;B7Z1I0;B7Z418	3	10	10	10	10	9	9	10	10	9	9	10	10	9	9	10	24.3	24.3	24.3	51.419	452	11	10	9	11	6.73e-76	26210000	5483100	5509400	9502200	5714900	5691700	6506400	12107000	8172900	4
112	90;104;194;705;1080;1134;1138;1150;1289;1438;1510;1683;1770;1969;2679;2879;3189	14	145	IPI00013808;IPI00908458;IPI00908776;IPI00845465;IPI00942539	IPI00013808;IPI00908458	IPI00013808	17;12;8;4;4	4;3;1;1;1	4;3;1;1;1	Alpha-actinin-4;F-actin cross-linking protein;Non-muscle alpha-actinin 4;ACTN4 protein;cDNA FLJ58087, highly similar to Alpha-actinin-4	ACTN4	Alpha-actinin-4;cDNA FLJ58087, highly similar to Alpha-actinin-4	O43707;Q96BG6;B4E337	5	17	4	4	17	17	16	17	4	4	3	4	4	4	3	4	23.2	6.6	6.6	104.85	911	4	4	3	4	4.81e-219	2665900	717600	589840	721650	636770	834290	646040	993020	905880	4
113	470;1169			IPI00013847;IPI00792890	IPI00013847;IPI00792890	IPI00013847	2;1	2;1	2;1	Complex III subunit 1;Core protein I;Cytochrome b-c1 complex subunit 1, mitochondrial;Ubiquinol-cytochrome-c reductase complex core protein 1;cDNA FLJ51625, highly similar to Ubiquinol-cytochrome-c reductase complex coreprotein I, mitochondrial (EC 1.10.2.2);cDNA FLJ52292, highly similar to Ubiquinol-cytochrome-c reductase complex coreprotein I, mitochondrial (EC 1.10.2.2)	UQCRC1	Cytochrome b-c1 complex subunit 1, mitochondrial;cDNA FLJ52292, highly similar to Ubiquinol-cytochrome-c reductase complex coreprotein I, mitochondrial	P31930;B2R7R8;B4DUL5;B4DZB9	2	2	2	2	2	2	0	1	2	2	0	1	2	2	0	1	8.1	8.1	8.1	52.645	480	2	2		1	2.4e-05	788990	411850	331430	0	45709	694980	236510	0	73161	3
114	86			IPI00013897;IPI00794448	IPI00013897;IPI00794448	IPI00013897	1;1	1;1	1;1	CDw156;Disintegrin and metalloproteinase domain-containing protein 10;Kuzbanian protein homolog;Mammalian disintegrin-metalloprotease;ADAM10 protein;ADAM metallopeptidase domain 10, isoform CRA_a;Putative uncharacterized protein ADAM10;cDNA FLJ57594, highly similar to ADAM 10 (EC 3.4.24.81) (Adisintegrin and metalloproteinase domain 10)	ADAM10;KUZ;MADM;hCG_40040	Disintegrin and metalloproteinase domain-containing protein 10;Putative uncharacterized protein ADAM10	O14672;A0AV88;A8MXI9;A8MY20;B4DU28	2	1	1	1	1	0	0	0	1	0	0	0	1	0	0	0	2	2	2	84.141	748	1				5.77e-05	244520	244520	0	0	0	295780	0	0	0	1
115	594			IPI00014053;IPI00376117	IPI00014053;IPI00376117	IPI00014053	1;1	1;1	1;1	Mitochondrial import receptor subunit TOM40 homolog;p38.5;Protein Haymaker;Translocase of outer membrane 40 kDa subunit homolog	C19orf1;PEREC1;TOM40;TOMM40	Isoform 1 of Mitochondrial import receptor subunit TOM40 homolog;Isoform 2 of Mitochondrial import receptor subunit TOM40 homolog	O96008-1;O96008;O96008-2	2	1	1	1	1	1	0	0	1	1	0	0	1	1	0	0	3	3	3	37.893	361	1	1			0.030401	65387	33788	31598	0	0	0	41316	0	0	1
117	455			IPI00014230;IPI00796075;IPI00796630	IPI00014230;IPI00796075;IPI00796630	IPI00014230	1;1;1	1;1;1	1;1;1	Complement component 1 Q subcomponent-binding protein, mitochondrial;GC1q-R protein;Glycoprotein gC1qBP;Hyaluronan-binding protein 1;Mitochondrial matrix protein p32;p33;cDNA FLJ75700, highly similar to Homo sapiens complement component 1, q subcomponent binding protein (C1QBP), nuclear gene encoding mitochondrial protein, mRNA	C1QBP;GC1QBP;HABP1;SF2P32	Complement component 1 Q subcomponent-binding protein, mitochondrial;20 kDa protein;16 kDa protein	Q07021;A8K651	3	1	1	1	1	1	1	1	1	1	1	1	1	1	1	1	9.2	9.2	9.2	31.362	282	1	1	1	1	0.00079198	113450	8961.5	20563	47170	36758	6845.6	22985	48632	65216	4
322	1536;2569;3259			IPI00014587;IPI00790571;IPI00945731;IPI00216393;IPI00946844;IPI00945566	IPI00014587;IPI00790571;IPI00945731;IPI00216393;IPI00946844	IPI00014587	3;3;3;3;2;1	3;3;3;3;2;1	3;3;3;3;2;1	Clathrin light chain A;cDNA FLJ60566, highly similar to Clathrin light chain A;Putative uncharacterized protein CLTA	CLTA	Isoform Brain of Clathrin light chain A;Isoform 3 of Clathrin light chain A;cDNA FLJ60566, highly similar to Clathrin light chain A;Isoform Non-brain of Clathrin light chain A;Putative uncharacterized protein CLTA	P09496-1;P09496;P09496-3;B4DIN1;P09496-2;C9J8P9	6	3	3	3	3	3	3	2	3	3	3	2	3	3	3	2	14.9	14.9	14.9	27.076	248	3	3	3	2	2.09e-29	1823900	834050	473280	351390	165180	92752	71311	44414	2034800	4
121	1296;1858;2023;2390;2905;3139;3140			IPI00015148;IPI00019345;IPI00877120;IPI00796349;IPI00816182;IPI00412525;IPI00908754;IPI00942831;IPI00940725	IPI00015148;IPI00019345;IPI00877120;IPI00796349;IPI00816182;IPI00412525;IPI00908754;IPI00942831	IPI00015148	7;6;6;6;6;5;5;4;3	7;6;6;6;6;5;5;4;3	7;6;6;6;6;5;5;4;3	GTP-binding protein smg p21B;Ras-related protein Rap-1b;C21KG;G-22K;GTP-binding protein smg p21A;Ras-related protein Krev-1;Ras-related protein Rap-1A;cDNA FLJ75985, highly similar to Homo sapiens RAP1A, member of RAS oncogene family (RAP1A), transcript variant 2, mRNA;RAP1A, member of RAS oncogene family;PNAS-140;Ras-related protein Rap-1b-like protein;cDNA FLJ51696, highly similar to Ras-relate…	OK/SW-cl.11;RAP1B;KREV1;RAP1A;hCG_1818872;RP4-773A18.1-001	Ras-related protein Rap-1b;Ras-related protein Rap-1A;RAP1A, member of RAS oncogene family;18 kDa protein;PNAS-140 (Fragment);Ras-related protein Rap-1b-like protein;cDNA FLJ50714, moderately similar to Ras-related protein Rap-1b;cDNA FLJ50711, moderately	P61224;P62834;A8KAH9;Q5U0C3;Q9BXV4;A6NIZ1;B4DQI8;B4DW94;B4DW74;B7ZAY2;B7ZB78	9	7	7	7	7	7	7	7	7	7	7	7	7	7	7	7	47.8	47.8	47.8	20.825	184	12	10	12	12	2.5e-120	59077000	11841000	12332000	24920000	9984800	11788000	14705000	26492000	18350000	4
128	1840;2606;3174			IPI00016339;IPI00017344;IPI00023510;IPI00927674;IPI00789439;IPI00908835;IPI00924852;IPI00797838;IPI00927292;IPI00927919	IPI00016339;IPI00017344;IPI00023510;IPI00927674;IPI00789439;IPI00908835;IPI00924852	IPI00016339	3;2;2;2;2;2;2;1;1;1	3;2;2;2;2;2;2;1;1;1	3;2;2;2;2;2;2;1;1;1	L1880;RAB5L;Ras-related protein Rab-5C;Ras-related protein Rab-5B;RAB5B protein;Ras-related protein Rab-5A;cDNA, FLJ93000, Homo sapiens RAB5A, member RAS oncogene family (RAB5A), mRNA;Cervical cancer oncogene 10 protein;RAB5A protein;RAB5A, member RAS oncogene family, isoform CRA_a;cDNA FLJ51867, highly similar to Ras-related protein Rab-5A;cDNA FLJ60627, highly similar to Ras-related protein Rab…	RAB5C;RABL;RAB5B;RAB5;RAB5A;HCC-10;hCG_1776267;hCG_25009	Ras-related protein Rab-5C;Ras-related protein Rab-5B;Ras-related protein Rab-5A;cDNA FLJ51867, highly similar to Ras-related protein Rab-5A;19 kDa protein;RAB5B, member RAS oncogene family, isoform CRA_b;Putative uncharacterized protein RAB5A	P51148;P61020;Q6FI54;P20339;Q6FI44;B4DJA5;B4DKD7;C9JMI9	10	3	3	3	3	3	1	2	3	3	1	2	3	3	1	2	16.2	16.2	16.2	23.482	216	3	3	1	2	2.48e-22	2200800	949350	759600	221240	270580	1185600	1099700	215420	294790	4
129	500			IPI00016342;IPI00945574;IPI00945337;IPI00947210;IPI00946776	IPI00016342;IPI00945574;IPI00945337;IPI00947210;IPI00946776	IPI00016342	1;1;1;1;1	1;1;1;1;1	1;1;1;1;1	Ras-related protein Rab-7a;cDNA FLJ55895, highly similar to Ras-related protein Rab-7;Putative uncharacterized protein RAB7A	RAB7;RAB7A	Ras-related protein Rab-7a;Putative uncharacterized protein RAB7A;Putative uncharacterized protein RAB7A;Putative uncharacterized protein RAB7A;Putative uncharacterized protein RAB7A	P51149;B4DPH9;C9J8S3;C9J4V0;C9JUH2;C9J4S4	5	1	1	1	1	1	1	1	1	1	1	1	1	1	1	1	6.8	6.8	6.8	23.489	207	1	1	1	1	1.32e-22	533530	148930	134300	143680	106630	176870	184580	141070	167420	4
131	1095			IPI00016608;IPI00797864;IPI00909375	IPI00016608;IPI00797864;IPI00909375	IPI00016608	1;1;1	1;1;1	1;1;1	Membrane protein p24A;Transmembrane emp24 domain-containing protein 2;cDNA, FLJ93436, Homo sapiens coated vesicle membrane protein (RNP24), mRNA;RNP24 protein;Transmembrane emp24 domain trafficking protein 2, isoform CRA_a;cDNA FLJ52153, highly similar to Transmembrane emp24 domain-containing protein 2;cDNA FLJ52154, moderately similar to Transmembrane emp24 domain-containing protein 2	RNP24;TMED2;hCG_1743563	Transmembrane emp24 domain-containing protein 2;cDNA FLJ52153, highly similar to Transmembrane emp24 domain-containing protein 2;cDNA FLJ52154, moderately similar to Transmembrane emp24 domain-containing protein 2	Q15363;Q6FHT8;B4DP27;B4E020	3	1	1	1	1	1	1	1	1	1	1	1	1	1	1	1	4.5	4.5	4.5	22.761	201	1	1	1	1	0.0012802	511990	258870	161700	52132	39291	372120	220430	21302	25675	4
133	445;1723;1821;2483			IPI00016891;IPI00023526;IPI00217943;IPI00946019;IPI00945534;IPI00946537;IPI00001618;IPI00748927;IPI00946870;IPI00946358	IPI00016891;IPI00023526;IPI00217943;IPI00946019;IPI00945534;IPI00946537	IPI00016891	4;3;3;3;3;2;1;1;1;1	4;3;3;3;3;2;1;1;1;1	4;3;3;3;3;2;1;1;1;1	Ras-related protein Rab-6B;RAB6B protein;Ras-related protein Rab-6A;cDNA FLJ51066, highly similar to Ras-related protein Rab-6A;cDNA FLJ52284, highly similar to Ras-related protein Rab-6A;RAB6A, member RAS oncogene family isoform a variant;RAB6A protein;GTP-binding protein RAB6B;GTP-binding protein RAB6A';cDNA FLJ57728, highly similar to Ras-related protein Rab-6B;Putative uncharacterized protein…	RAB6B;RAB6;RAB6A;RAB6A'	Ras-related protein Rab-6B;Isoform 1 of Ras-related protein Rab-6A;Isoform 2 of Ras-related protein Rab-6A;cDNA FLJ57728, highly similar to Ras-related protein Rab-6B;14 kDa protein;Putative uncharacterized protein RAB6B	Q9NRW1;Q6AZ91;P20340-1;P20340;B7Z5Z9;B7Z772;Q53ET8;Q6FGX3;Q9UL29;P20340-2;Q9UL30;B7Z337;C9JU14	10	4	4	4	4	4	4	3	4	4	4	3	4	4	4	3	25	25	25	23.461	208	5	5	5	4	6.65e-25	12805000	4149800	3629000	3387700	1638900	5282100	4878300	3283800	2329100	4
134	41;393;569;942;1114;1722;1804;2047;2086			IPI00017256;IPI00478433;IPI00847168;IPI00377066;IPI00457006	IPI00017256;IPI00478433;IPI00847168;IPI00377066	IPI00017256	9;8;7;6;1	9;8;7;6;1	9;8;7;6;1	Ras suppressor protein 1;Putative uncharacterized protein RSU1;Ras suppressor protein 1 variant 5;RSU1 protein;cDNA FLJ77304, highly similar to Homo sapiens Ras suppressor protein 1 (RSU1), transcript variant 2, mRNA;Ras suppressor protein 1, isoform CRA_b	RSP1;RSU1;hCG_2017814;RP11-197M22.1-003	Ras suppressor protein 1;Ras suppressor protein 1 variant 5;RSU1 protein (Fragment);ras suppressor protein 1 isoform 2	Q15404;A6NDA7;Q32Q10;A8KA46	5	9	9	9	9	9	9	9	9	9	9	9	9	9	9	9	47.3	47.3	47.3	31.54	277	9	9	9	9	3.78e-74	23116000	3297100	4035500	10291000	5492600	4807800	5269800	10367000	7894400	4
135	713;1256;3260;3273			IPI00017334;IPI00793658;IPI00791634;IPI00793442;IPI00386679;IPI00909721	IPI00017334;IPI00793658;IPI00791634;IPI00793442	IPI00017334	4;3;3;2;1;1	4;3;3;2;1;1	4;3;3;2;1;1	Prohibitin;cDNA FLJ78511, highly similar to Homo sapiens prohibitin (PHB), mRNA;cDNA, FLJ93035, Homo sapiens prohibitin (PHB), mRNA;Prohibitin, isoform CRA_a;Prohibitin variant;PHB protein;Putative uncharacterized protein PHB	PHB;hCG_29613	Prohibitin;Putative uncharacterized protein PHB;Putative uncharacterized protein PHB;Putative uncharacterized protein PHB	P35232;A8K401;Q53FV0;Q6FHP5;Q6PUJ7;C9JW96;C9JZ20;A8MUL1	6	4	4	4	3	4	3	3	3	4	3	3	3	4	3	3	22.8	22.8	22.8	29.804	272	3	4	3	3	1.56e-11	1921600	740570	630320	351400	199320	1381900	622660	219200	166400	4
137	339;550;885;1073;1164;1404;1918;1987;2067;2181;2306;2573;2956;3125			IPI00017601;IPI00947307;IPI00946417;IPI00794184;CON__ENSEMBL:ENSBTAP00000031900;IPI00946590;IPI00946976;IPI00793626;IPI00879084;IPI00947518;IPI00793108;IPI00947311;IPI00792393	IPI00017601;IPI00947307;IPI00946417;IPI00794184	IPI00017601	14;12;11;11;3;2;2;2;2;2;1;1;1	14;12;11;11;3;2;2;2;2;2;1;1;1	14;12;11;11;3;2;2;2;2;2;1;1;1	Ceruloplasmin;Ferroxidase;Ceruloplasmin (Ferroxidase);Ceruloplasmin (Ferroxidase), isoform CRA_a;CP protein;cDNA FLJ76826, highly similar to Homo sapiens ceruloplasmin (ferroxidase) (CP), mRNA;cDNA FLJ58075, highly similar to Ceruloplasmin (EC 1.16.3.1);cDNA FLJ37971 fis, clone CTONG2009958, highly similar to CERULOPLASMIN (EC 1.16.3.1)	CP;hCG_1781201	Ceruloplasmin;cDNA FLJ58075, highly similar to Ceruloplasmin;Putative uncharacterized protein CP;cDNA FLJ37971 fis, clone CTONG2009958, highly similar to CERULOPLASMIN	P00450;A5PL27;A8K5A4;Q1L857;B7Z5Q2;Q6NSB2;C9JDZ0;B3KTA8	13	14	14	14	13	14	11	14	13	14	11	14	13	14	11	14	21.9	21.9	21.9	122.2	1065	17	18	15	18	2.41e-119	37588000	5570400	7529900	2734700	21753000	5678900	7190500	1671600	39564000	4
139	526;876;905;1235;1638;1709;1710;1732;1940;2137;2506;2507;2543;2729			IPI00017696;IPI00749179;IPI00877989;IPI00385294;IPI00878772;IPI00791987;IPI00790679	IPI00017696;IPI00749179	IPI00017696	14;13;6;6;2;2;1	14;13;6;6;2;2;1	14;13;6;6;2;2;1	C1 esterase;Complement C1s subcomponent;Complement C1s subcomponent heavy chain;Complement C1s subcomponent light chain;Complement component 1 subcomponent s;cDNA FLJ77835, highly similar to Homo sapiens complement component 1, s subcomponent (C1S), transcript variant 2, mRNA;cDNA FLJ30621 fis, clone CTONG2001681, highly similar to Complement C1s subcomponent (EC 3.4.21.42);Putative uncharacteriz…	C1S	Complement C1s subcomponent;Putative uncharacterized protein C1S	P09871;A8K2N0;B3KNX0;A6NG18	7	14	14	14	7	9	14	10	7	9	14	10	7	9	14	10	19.9	19.9	19.9	76.684	688	8	10	16	12	6.6e-116	52941000	345370	377220	51221000	997080	14356	13672	53664000	34649	4
142	148;467;475;897;1523;1823;1848;1852;1944;1967;2025;2377;2416;2500;2893;2916;3122;3171			IPI00017895;IPI00719611	IPI00017895;IPI00719611	IPI00017895	18;18	18;18	18;18	Glycerol-3-phosphate dehydrogenase, mitochondrial;mtGPD;cDNA FLJ78475, highly similar to Homo sapiens glycerol-3-phosphate dehydrogenase 2 (mitochondrial) (GPD2), mRNA;cDNA FLJ57187, highly similar to Glycerol-3-phosphate dehydrogenase, mitochondrial (EC 1.1.99.5);Putative uncharacterized protein GPD2;GPD2 protein	GPD2	Isoform 1 of Glycerol-3-phosphate dehydrogenase, mitochondrial;Isoform 2 of Glycerol-3-phosphate dehydrogenase, mitochondrial	P43304-1;P43304;A8K1Z2;B7Z601;Q53T76;Q8WUQ0;P43304-2	2	18	18	18	17	15	12	12	17	15	12	12	17	15	12	12	36.5	36.5	36.5	80.852	727	17	15	13	12	4e-84	11735000	5444100	3680800	1887100	723190	7010200	4813700	1595700	1022100	4
143	250;444;2050;2598			IPI00018146;IPI00796727	IPI00018146;IPI00796727	IPI00018146	4;2	2;1	2;1	14-3-3 protein tau;14-3-3 protein T-cell;14-3-3 protein theta;Protein HS1;cDNA FLJ52118, highly similar to 14-3-3 protein theta;cDNA FLJ51144, highly similar to 14-3-3 protein theta;cDNA, FLJ79057, highly similar to 14-3-3 protein theta;Putative uncharacterized protein YWHAQ	YWHAQ	14-3-3 protein theta;Putative uncharacterized protein YWHAQ	P27348;B4DMT8;B4DY04;Q53S41;Q53RR5	2	4	2	2	4	4	4	4	2	2	2	2	2	2	2	2	20.8	13.5	13.5	27.764	245	3	3	3	3	3.44e-62	3523000	1132700	933490	893780	563050	1431400	1265100	808280	880130	4
144	782;1090;1353;1751;1817;1928;1929;1978;2391			IPI00018246;IPI00903226;IPI00220665;IPI00220663;IPI00220667;IPI00102864;IPI00917193;IPI00555601;IPI00005118	IPI00018246;IPI00903226;IPI00220665;IPI00220663;IPI00220667	IPI00018246	9;8;8;8;8;2;2;1;1	9;8;8;8;8;2;2;1;1	9;8;8;8;8;2;2;1;1	Brain form hexokinase;Hexokinase type I;Hexokinase-1;cDNA FLJ56506, highly similar to Hexokinase-1 (EC 2.7.1.1);Hexokinase;cDNA FLJ46359 fis, clone TESTI4049786, highly similar to Hexokinase-1 (EC 2.7.1.1);cDNA FLJ78173, highly similar to Homo sapiens hexokinase 1 (HK1) mRNA;Hexokinase 1;Hexokinase 1 isoform HKI variant;cDNA FLJ33948 fis, clone CTONG2018379, highly similar to Hexokinase-1 (EC 2.7…	HK1;RP11-404C6.1-003;HK1-ta;HK1-tb;RP11-404C6.1-016;RP11-404C6.1-004	Isoform 1 of Hexokinase-1;cDNA FLJ46359 fis, clone TESTI4049786, highly similar to Hexokinase-1;Isoform 3 of Hexokinase-1;Isoform 2 of Hexokinase-1;Isoform 4 of Hexokinase-1	P19367-1;P19367;B4DG62;Q71V75;B3KXY9;P19367-3;A8K7J7;B1AR61;P78542;Q59FD4;P19367-2;B1AR63;P19367-4;B1AR62;B3KRA9	9	9	9	9	9	9	7	8	9	9	7	8	9	9	7	8	11.7	11.7	11.7	102.48	917	10	11	8	9	1.55e-60	6176800	2337300	2035700	1228400	575390	2883700	2593600	1507000	653330	4
145	213;566;3073			IPI00018364;IPI00019346;IPI00009607;IPI00797809	IPI00018364;IPI00019346;IPI00009607;IPI00797809	IPI00018364	3;2;2;2	3;2;2;2	3;2;2;2	Ras-related protein Rap-2b;Putative uncharacterized protein DKFZp547A0616;Ras-related protein Rap-2a;RbBP-30;Ras-related protein Rap-2c	RAP2B;DKFZp547A0616;RAP2A;RAP2C	Ras-related protein Rap-2b;Ras-related protein Rap-2a;Ras-related protein Rap-2c;14 kDa protein	P61225;Q5JQ44;P10114;Q9Y3L5	4	3	3	3	3	3	3	3	3	3	3	3	3	3	3	3	26.8	26.8	26.8	20.504	183	3	3	3	3	5.71e-19	1892700	652670	609750	401970	228350	856780	930500	312930	253690	4
146	1979;2645			IPI00018465;IPI00552072;IPI00952607;IPI00952671	IPI00018465;IPI00552072;IPI00952607;IPI00952671	IPI00018465	2;2;2;2	2;2;2;2	2;2;2;2	CCT-eta;HIV-1 Nef-interacting protein;T-complex protein 1 subunit eta;Chaperonin containing TCP1, subunit 7 (Eta) variant;CCT7 protein;cDNA FLJ54832, highly similar to T-complex protein 1 subunit eta;Putative uncharacterized protein CCT7;cDNA FLJ59454, highly similar to T-complex protein 1 subunit eta;Chaperonin containing TCP1, subunit 7 (Eta), isoform CRA_a;cDNA FLJ54074, highly similar to T-co…	CCT7;CCTH;NIP7-1;hCG_1997313	T-complex protein 1 subunit eta;Putative uncharacterized protein CCT7;chaperonin containing TCP1, subunit 7 isoform d;chaperonin containing TCP1, subunit 7 isoform c	Q99832;Q53HV2;Q6IBT3;A8MWI8;B7Z1C9;B8ZZC9;B7Z4T9;B7Z4Z7;B7Z7I4	4	2	2	2	2	1	2	2	2	1	2	2	2	1	2	2	5.2	5.2	5.2	59.366	543	3	2	3	3	0.00033966	285650	77048	19415	111430	77756	37583	46181	187800	82795	4
147	396			IPI00018871;IPI00060031;IPI00940959;IPI00789069	IPI00018871;IPI00060031;IPI00940959;IPI00789069	IPI00018871	1;1;1;1	1;1;1;1	1;1;1;1	cDNA FLJ56285, highly similar to ADP-ribosylation factor-like protein 8B;ADP-ribosylation factor-like protein 10B;ADP-ribosylation factor-like protein 8A;Novel small G protein indispensable for equal chromosome segregation 2;cDNA, FLJ93607;ADP-ribosylation factor-like protein 10C;ADP-ribosylation factor-like protein 8B;Novel small G protein indispensable for equal chromosome segregation 1;cDNA FL…	ARL10B;ARL8A;GIE2;ARL10C;ARL8B;GIE1	cDNA FLJ56285, highly similar to ADP-ribosylation factor-like protein 8B;ADP-ribosylation factor-like protein 8A;ADP-ribosylation factor-like protein 8B;cDNA FLJ61158, highly similar to ADP-ribosylation factor-like protein 8B	B4E1J8;Q96BM9;B2R7U5;Q9NVJ2;B4DQT8	4	1	1	1	1	1	1	1	1	1	1	1	1	1	1	1	6.3	6.3	6.3	27.252	238	3	1	1	3	0.015439	840850	393310	151960	135610	159980	510230	213090	68204	274360	4
149	2784			IPI00019314;IPI00893049;IPI00893457;IPI00216583;IPI00059299;IPI00107432;IPI00922486;IPI00892515;IPI00059303;IPI00059300;IPI00059301	IPI00019314;IPI00893049;IPI00893457;IPI00216583;IPI00059299;IPI00107432;IPI00922486;IPI00892515;IPI00059303;IPI00059300;IPI00059301	IPI00019314	1;1;1;1;1;1;1;1;1;1;1	1;1;1;1;1;1;1;1;1;1;1	1;1;1;1;1;1;1;1;1;1;1	Protein G6b;Chromosome 6 open reading frame 25;cDNA FLJ35073 fis, clone PLACE6000630;Chromosome 6 open reading frame 25, isoform CRA_h;C6orf25 protein	C6orf25;G6B;DAMA-236L13.10-001;DADB-110M10.2-001;DAMC-117B11.4-001;hCG_43731;DAMA-236L13.10-003	Isoform B of Protein G6b;26 kDa protein;Chromosome 6 open reading frame 25;Isoform A of Protein G6b;Isoform F of Protein G6b;Isoform G of Protein G6b;C6orf25 protein;Chromosome 6 open reading frame 25;Isoform C of Protein G6b;Isoform E of Protein G6b;Isofo	O95866-1;O95866;B0V026;B0UXC5;O95866-2;B0V023;O95866-6;O95866-7;B7ZLJ5;B0UXC6;O95866-3;B0V024;O95866-5;B0UXC7;O95866-4;B0UXC4	11	1	1	1	1	1	1	1	1	1	1	1	1	1	1	1	3.7	3.7	3.7	26.163	241	2	2	2	2	0.0055531	7333000	3564300	1950900	1307800	510010	4967000	2467100	1012300	539380	4
152	2066			IPI00019385;IPI00647421;IPI00646864	IPI00019385;IPI00647421;IPI00646864	IPI00019385	1;1;1	1;1;1	1;1;1	Signal sequence receptor subunit delta;Translocon-associated protein subunit delta;Putative uncharacterized protein SSR4	SSR4;TRAPD	Translocon-associated protein subunit delta precursor;Putative uncharacterized protein SSR4;Putative uncharacterized protein SSR4	P51571;A6NLM8;C9K034	3	1	1	1	1	1	1	1	1	1	1	1	1	1	1	1	10.3	10.3	10.3	20.213	184	1	1	1	1	7.71e-10	683580	259470	200530	159840	63745	370960	291870	106860	68149	4
154	4;73;74;110;114;116;150;195;207;292;311;366;367;368;371;372;389;465;466;535;590;593;615;636;637;647;773;841;858;874;1093;1094;1144;1145;1166;1175;1176;1236;1283;1293;1325;1326;1406;1416;1417;1422;1445;1446;1447;1458;1462;1472;1478;1481;1528;1539;1551;1719;1728;1729;1731;1743;1744;1745;1789;1859;1954;1955;2013;2040;2052;2061;2104;2128;2163;2192;2196;2225;2226;2237;2238;2246;2271;2283;2313;2316;231…	15;16;17;18;19;20	627;1028;1510;1537;1678;1910	IPI00019502;IPI00395772;IPI00742780;IPI00556012;IPI00873982;IPI00743857;IPI00020501;IPI00744256;IPI00024870;IPI00790503;IPI00479307;IPI00397526;IPI00878695	IPI00019502;IPI00395772	IPI00019502	112;71;31;13;12;12;12;12;12;8;8;8;7	112;71;31;13;12;12;12;12;12;8;8;8;7	109;69;31;13;9;9;9;9;9;7;7;7;7	Cellular myosin heavy chain, type A;Myosin heavy chain 9;Myosin heavy chain, non-muscle IIa;Myosin-9;Non-muscle myosin heavy chain A;Non-muscle myosin heavy chain IIa;cDNA FLJ77145, highly similar to Homo sapiens myosin, heavy polypeptide 9, non-muscle (MYH9), mRNA;cDNA FLJ57040, highly similar to Myosin-9;MYH9 variant protein;Myosin, heavy polypeptide 9, non-muscle, isoform CRA_a;Non-muscle myos…	MYH9;hCG_41454	Isoform 1 of Myosin-9;Isoform 2 of Myosin-9	P35579-1;P35579;A8K6E4;B4E3S1;Q60FE2;Q86XU5;Q99529;P35579-2;Q2PS10;Q9UMJ0	13	112	112	109	111	111	102	108	111	111	102	108	108	108	99	105	51.9	51.9	50.6	226.53	1960	189	187	163	177	0	2013900000	806600000	633490000	365820000	207940000	1091400000	851230000	307630000	252090000	4
156	844;1142;1560			IPI00019580;IPI00937938	IPI00019580	IPI00019580	3;1	3;1	3;1	Activation peptide;Angiostatin;Plasmin heavy chain A;Plasmin heavy chain A, short form;Plasmin light chain B;Plasminogen;cDNA, FLJ93426, highly similar to Homo sapiens plasminogen (PLG), mRNA;cDNA FLJ58778, highly similar to Plasminogen (EC 3.4.21.7);Putative uncharacterized protein DKFZp779M0222;Apolipoprotein;Apolipoprotein (A);Apolipoprotein A-II;Putative uncharacterized protein PLGL;PLG prote…	PLG;DKFZp779M0222;Apo(a);APOA2;PLGL	Plasminogen	P00747;B2R7F8;B4DPH4;Q68DS2;Q9UBQ9;Q9UMI2	2	3	3	3	3	3	2	3	3	3	2	3	3	3	2	3	3.6	3.6	3.6	90.568	810	4	5	2	4	1.67e-12	3239200	1058300	1050300	222600	907950	1329300	1045500	230930	1722400	4
157	122;300;347;499;1715;2247;2550;3005			IPI00019591;IPI00939824;IPI00921523;IPI00939333;IPI00947496;IPI00947137;IPI00893864;IPI00218508;IPI00942200;IPI00947478;IPI00910539	IPI00019591;IPI00939824;IPI00921523;IPI00939333;IPI00947496;IPI00947137;IPI00893864	IPI00019591	8;8;8;8;7;5;4;3;3;1;1	8;8;8;8;7;5;4;3;3;1;1	8;8;8;8;7;5;4;3;3;1;1	cDNA FLJ55673, highly similar to Complement factor B (EC 3.4.21.47);Complement factor B;Complement factor B preproprotein variant;C3/C5 convertase;Complement factor B Ba fragment;Complement factor B Bb fragment;Glycine-rich beta glycoprotein;PBF2;Properdin factor B	CFB;hCG_43699;BF;BFD;DAMA-163J4.1-001	cDNA FLJ55673, highly similar to Complement factor B;141 kDa protein;Isoform 1 of Complement factor B (Fragment);86 kDa protein;124 kDa protein;Putative uncharacterized protein ENSP00000419887;Complement factor B	B4E1Z4;Q53F89;P00751-1;P00751;B0QZQ6;C9JYI6;B0UXW4	11	8	8	8	8	8	4	8	8	8	4	8	8	8	4	8	7.2	7.2	7.2	140.94	1266	8	8	4	8	6.89e-59	4503700	877420	900840	199300	2526200	635890	912800	321590	4608000	4
158	1020;1096;1926;2979			IPI00019755;IPI00642936;IPI00513927	IPI00019755;IPI00642936;IPI00513927	IPI00019755	4;3;2	4;3;2	4;3;2	Glutathione S-transferase omega-1;cDNA, FLJ94267, highly similar to Homo sapiens glutathione S-transferase omega 1 (GSTO1), mRNA;Glutathione S-transferase omega 1	GSTO1;GSTTLP28;RP11-99N20.1-004;RP11-99N20.1-005	Glutathione S-transferase omega-1;Glutathione S-transferase omega 1;Glutathione S-transferase omega 1	P78417;B2R983;Q5TA02;Q5TA01	3	4	4	4	4	4	4	4	4	4	4	4	4	4	4	4	17	17	17	27.566	241	4	4	4	4	4.19e-08	4278600	493550	570860	2036300	1177900	317540	455110	2273200	2217500	4
565	20;1278;1615;1620;1960;1961;2046;2523;2574;2921;2930;3149			IPI00019971;IPI00943192;IPI00910670;IPI00642310	IPI00019971;IPI00943192;IPI00910670;IPI00642310	IPI00019971	12;12;12;11	12;12;12;11	12;12;12;11	cDNA FLJ54775, highly similar to Syntaxin-binding protein 2;Syntaxin binding protein 2 variant;Protein unc-18 homolog 2;Protein unc-18 homolog B;Syntaxin-binding protein 2;Hunc18b2;cDNA FLJ53447, highly similar to Syntaxin-binding protein 2;STXBP2 protein;Syntaxin binding protein 2;Syntaxin binding protein 2, isoform CRA_b	STXBP2;UNC18B;hCG_22249	cDNA FLJ54775, highly similar to Syntaxin-binding protein 2;Syntaxin-binding protein 2;cDNA FLJ53447, highly similar to Syntaxin-binding protein 2;syntaxin binding protein 2 isoform b	B4E175;Q53GF4;Q15833;O00184;B4DY46;Q9BU65	4	12	12	12	12	11	10	11	12	11	10	11	12	11	10	11	21.9	21.9	21.9	67.699	604	15	14	12	14	2.58e-66	10882000	4294100	3343500	2102700	1142200	5291300	4437500	2215800	1550600	4
162	638;849;1054;1245;1464;2448;2885			IPI00020599;IPI00383751	IPI00020599	IPI00020599	7;1	7;1	7;1	Calregulin;Calreticulin;CRP55;Endoplasmic reticulum resident protein 60;grp60;HACBP;cDNA FLJ53009, highly similar to Calreticulin;cDNA FLJ58668, highly similar to Calreticulin;Calreticulin variant	CALR;CRTC	Calreticulin	P27797;B4DHR1;B4E2Y9;Q53G71;Q6IAT4	2	7	7	7	7	7	7	7	7	7	7	7	7	7	7	7	33.1	33.1	33.1	48.141	417	10	12	12	12	2.1e-84	40390000	11976000	9906000	11718000	6790200	22165000	15785000	6054900	6010300	4
163	27;163;355;980;1046;1361;1442;2149;2397;2616;2736;3090;3100			IPI00020984;IPI00941747;IPI00477719;IPI00383227;IPI00442866	IPI00020984;IPI00941747	IPI00020984	13;13;5;4;3	13;13;5;4;3	13;13;5;4;3	cDNA FLJ55574, highly similar to Calnexin;Calnexin;IP90;Major histocompatibility complex class I antigen-binding protein p88;p90;cDNA FLJ54242, highly similar to Calnexin	CANX	cDNA FLJ55574, highly similar to Calnexin;Calnexin	B4DGP8;P27824;B4E2T8	5	13	13	13	13	13	11	13	13	13	11	13	13	13	11	13	27	27	27	71.502	627	14	14	12	14	3.15e-98	28964000	12659000	8916500	4566300	2822900	16882000	11981000	3968200	3221100	4
164	399;444;768;945;946;1430;1898;2050;2577;2600;3187;3188			IPI00021263;IPI00789337;IPI00793388;IPI00790689;IPI00013890;IPI00411765;IPI00651755	IPI00021263;IPI00789337	IPI00021263	12;7;3;3;2;2;1	12;7;3;3;2;2;1	10;6;2;2;0;0;0	14-3-3 protein zeta/delta;Protein kinase C inhibitor protein 1;Tyrosine 3-monooxygenase/tryptophan 5-monooxygenase activation protein zeta polypeptide;cDNA, FLJ79516, highly similar to 14-3-3 protein zeta/delta;cDNA FLJ50142, highly similar to 14-3-3 protein zeta/delta (Protein kinase Cinhibitor protein 1);cDNA FLJ51775, highly similar to 14-3-3 protein zeta/delta;Tyrosine 3-monooxygenasea/trypto…	YWHAZ	14-3-3 protein zeta/delta;cDNA FLJ51775, highly similar to 14-3-3 protein zeta/delta	P63104;D0PNI1;B0AZS6;B7Z2E6;B7Z465;Q2F831	7	12	12	10	12	12	12	11	12	12	12	11	10	10	10	9	51.4	51.4	44.1	27.745	245	15	15	16	14	1.53e-271	152380000	41088000	37453000	46832000	27007000	51657000	49795000	45314000	41928000	4
11	59;234;235;383;386;580;936;1086;1087;1130;1381;1411;1493;1525;2199;2200;2324;2587;2769;2817;3227	6;7;8;9;10	153;190;305;325;355	IPI00021439;CON__P60712;IPI00021440;IPI00930226;IPI00894365;IPI00894498;IPI00878173;IPI00479743;IPI00739539;IPI00916212;IPI00790339;IPI00796881;IPI00942659;IPI00887316;IPI00893981;IPI00894523;IPI00738655;IPI00888712;IPI00930066;IPI00893604;IPI00807522;IPI00917545;IPI00555733;IPI00556391;IPI00893501;IPI00937995;IPI00556300;IPI00929430;IPI00885048;IPI00876919;IPI00942939;IPI00954247;IPI00556614;IPI…	IPI00021439;CON__P60712;IPI00021440;IPI00930226;IPI00894365;IPI00894498	IPI00021439	21;21;21;21;20;19;10;9;9;9;8;8;8;7;7;7;6;6;6;6;3;3;2;2;2;1;1;1;1;1;1;1;1;1;1	21;21;21;21;20;19;10;9;9;9;8;8;8;7;7;7;6;6;6;6;3;3;2;2;2;1;1;1;1;1;1;1;1;1;1	6;6;6;6;5;6;0;0;0;0;1;1;1;0;0;0;0;0;0;0;1;0;1;1;0;0;0;0;0;0;0;0;0;0;0	Actin, cytoplasmic 1;Actin, cytoplasmic 1, N-terminally processed;Beta-actin;cDNA FLJ55253, highly similar to Actin, cytoplasmic 1;cDNA, FLJ79260, highly similar to Actin, cytoplasmic 2;HCG15971, isoform CRA_a;PS1TP5-binding protein 1;Beta actin variant;Actin-like protein;ACTG1 protein;Putative uncharacterized protein;Actin, cytoplasmic 2;Actin, cytoplasmic 2, N-terminally processed;Gamma-actin;c…	ACTB;hCG_15971;PS1TP5BP1;ACT;ACTG1;ACTG	Actin, cytoplasmic 1;>P60712 SWISS-PROT:P60712 (Bos taurus) Actin, cytoplasmic 1;Actin, cytoplasmic 2;cDNA FLJ57283, highly similar to Actin, cytoplasmic 2;cDNA FLJ52842, highly similar to Actin, cytoplasmic 1;Beta actin variant (Fragment)	P60709;B4DW52;B7ZAP6;Q1KLZ0;Q53G76;Q53G99;Q562L5;Q562L6;Q562L9;Q562M3;Q562M5;Q562N0;Q562N2;Q562N8;Q562P0;Q562R8;Q562S0;Q562U1;Q562U2;Q562V5;Q562X9;Q562Y6;Q562Y8;Q562Z4;Q562Z6;Q562Z7;Q6PJ43;Q8WVW5;P60712;P63261;B4E3A4;A4UCT3;A5GZ75;B3KWQ3;B4DVQ0;B4E335;Q96DE1;Q96FU6;Q9UE89;Q9UMN3;A1E282;Q53GK6	35	21	21	6	20	21	18	20	20	21	18	20	6	6	5	6	56.8	56.8	22.4	41.736	375	43	42	37	42	0	3329100000	963130000	779030000	1038300000	548650000	1252100000	1002400000	1038200000	806680000	4
165	346;1079;1220;1524;1663;1916;3078			IPI00021458;IPI00017184;IPI00657915;IPI00853165;IPI00853100;IPI00100980;IPI00005578;IPI00852957;IPI00853038	IPI00021458;IPI00017184;IPI00657915;IPI00853165;IPI00853100	IPI00021458	7;5;5;4;4;1;1;1;1	7;5;5;4;4;1;1;1;1	7;5;5;4;4;1;1;1;1	EH domain-containing protein 3;PAST homolog 3;cDNA FLJ58167, highly similar to EH-domain-containing protein 3;cDNA, FLJ78905, highly similar to EH-domain-containing protein 3;EH domain-containing protein 1;PAST homolog 1;Testilin;cDNA FLJ40523 fis, clone TESTI2046872, highly similar to EH-domain-containing protein 1;cDNA, FLJ92624, highly similar to Homo sapiens EH-domain containing 1 (EHD1), mRN…	EHD2;EHD3;PAST3;CDABP0131;EHD1;PAST;PAST1;hCG_23386	EH domain-containing protein 3;EH domain-containing protein 1;cDNA FLJ55166, highly similar to EH-domain-containing protein 1;Putative uncharacterized protein EHD1;Putative uncharacterized protein EHD1	Q9NZN3;B4DFR5;Q9H4M9;B2R5U3;B4DMV9;B4DR44;B4DTR4;B4DZH9;C9JC03;C9J2Z4;C9JDQ8	9	7	7	7	7	5	7	7	7	5	7	7	7	5	7	7	17.6	17.6	17.6	61.895	546	9	7	8	8	5.38e-20	4973800	1139100	810890	1799000	1224800	1461800	1086400	1801800	1845800	4
345	265;1128;3050			IPI00021766;IPI00894213;IPI00477663;IPI00478442;IPI00894099;IPI00873380;IPI00219207	IPI00021766;IPI00894213;IPI00477663;IPI00478442;IPI00894099;IPI00873380;IPI00219207	IPI00021766	3;3;3;3;3;3;3	1;1;1;1;1;1;1	1;1;1;1;1;1;1	Foocen;Neurite outgrowth inhibitor;Neuroendocrine-specific protein;Neuroendocrine-specific protein C homolog;Reticulon-4;Reticulon-5;RTN-x;cDNA FLJ54947, highly similar to Reticulon-4;NOGO-A;Putative uncharacterized protein RTN4;Reticulon 4, isoform CRA_c;Reticulon 4, isoform CRA_f;RNT4;RTN4 isoform Ab;RTN4 isoform D;RTN4 isoform E;RTN4 isoform F;RTN4 isoform G;RTN4 isoform Aa;Nogo-C;Reticulon 4,…	KIAA0886;My043;NOGO;RTN4;SP1507;Nbla10545;hCG_1784307;Nbla00271;NOGOC	Isoform 1 of Reticulon-4;Isoform 6 of Reticulon-4;Isoform 4 of Reticulon-4;Isoform 5 of Reticulon-4;Putative uncharacterized protein RTN4;Nogo-C;Isoform 3 of Reticulon-4	Q9NQC3-1;Q9NQC3;Q9NQC3-6;B4DZ44;Q3LIF1;Q53RF4;Q8IUA4;Q9NQC3-4;Q3LIF4;Q9NQC3-5;C9J603;A6XGP7;Q9NQC3-3;Q53SY1;Q7L7Q5	7	3	1	1	3	3	3	3	1	1	1	1	1	1	1	1	3.2	0.7	0.7	129.93	1192	1	1	1	1	9.92e-35	3401200	1347900	1281200	513100	259100	1755200	1819700	375700	282520	4
168	100;363;433;487;642;660;1485;1633;1738;1776;2142;2214;2663;2664;2845;2996;3008	21;22	136;172	IPI00021841;IPI00853525;CON__P15497	IPI00021841;IPI00853525	IPI00021841	17;14;1	17;14;1	17;14;1	Apolipoprotein A1;Apolipoprotein A-I;Apolipoprotein A-I(1-242);APOA1 protein;Apolipoprotein A-1 A175P variant	APOA1	Apolipoprotein A-I;Apolipoprotein A1	P02647;Q6LEJ8;Q8TDB0;Q9Y355	3	17	17	17	17	17	17	17	17	17	17	17	17	17	17	17	59.2	59.2	59.2	30.777	267	27	27	26	27	0	578400000	100420000	174310000	101640000	202030000	99575000	220860000	83357000	370310000	4
169	99;129;264;846;892;1516;1537;1585;1666;1714;2300;2418;2579;3000;3088;3120;3274			IPI00021842;IPI00878953;IPI00879456;IPI00879368;CON__Q03247;IPI00442843	IPI00021842;IPI00878953;IPI00879456;IPI00879368	IPI00021842	17;11;10;10;4;2	17;11;10;10;4;2	17;11;10;10;4;2	Apolipoprotein E;MRNA for apolipoprotein E (apo E);Apolipoprotein E3	APOE	Apolipoprotein E;MRNA for apolipoprotein E;25 kDa protein;Apolipoprotein E	P02649;Q6LBZ1;Q13791;Q6LA97;Q8TCZ8	6	17	17	17	17	17	16	17	17	17	16	17	17	17	16	17	55.8	55.8	55.8	36.154	317	20	20	18	20	4.6e-187	97333000	30488000	23578000	24327000	18939000	40492000	29010000	23627000	29194000	4
174	140;428;434;652;872;919;920;972;1022;1123;1135;1905;1930;2072;2079;2094;2158;2207;2208;2221;2240;2348;2642;2977;2990	25;26;27;28	110;257;259;536	IPI00021885;IPI00029717;IPI00871469;IPI00902755;CON__P02672	IPI00021885;IPI00029717	IPI00021885	25;25;7;7;1	25;25;7;7;1	25;25;7;7;1	Fibrinogen alpha chain;Fibrinopeptide A;cDNA FLJ78367, highly similar to Homo sapiens fibrinogen, A alpha polypeptide (FGA), transcriptvariant alpha, mRNA	FGA	Isoform 1 of Fibrinogen alpha chain;Isoform 2 of Fibrinogen alpha chain	P02671-1;P02671;A8K3E4;P02671-2;Q4QQH7	5	25	25	25	25	25	25	24	25	25	25	24	25	25	25	24	31.4	31.4	31.4	94.972	866	44	43	41	41	1.43e-248	456690000	104480000	117970000	126530000	107720000	126510000	158550000	118950000	175410000	4
178	930;1057;1319			IPI00022202;IPI00215777;IPI00790115;IPI00788624;IPI00793177;IPI00791315	IPI00022202;IPI00215777;IPI00790115;IPI00788624;IPI00793177;IPI00791315	IPI00022202	3;3;3;3;3;2	3;3;3;3;3;2	3;3;3;3;3;2	Phosphate carrier protein, mitochondrial;Phosphate transport protein;Solute carrier family 25 member 3;cDNA, FLJ96465, highly similar to Homo sapiens solute carrier family 25 (mitochondrial carrier;phosphate carrier), member 3 (SLC25A3), nuclear gene encodingmitochondrial protein, transcript variant 1b, mRNA;Solute carrier family 25 member 3 isoform b variant;cDNA FLJ90278 fis, clone NT2RP1000325…	OK/SW-cl.48;PHC;SLC25A3	Isoform A of Phosphate carrier protein, mitochondrial;Isoform B of Phosphate carrier protein, mitochondrial;cDNA FLJ90278 fis, clone NT2RP1000325, highly similar to Phosphate carrier protein, mitochondrialprecursor;31 kDa protein;24 kDa protein;21 kDa prot	Q00325-1;Q00325;Q00325-2;B2RE88;Q53HC3;Q8NCF7	6	3	3	3	3	3	2	3	3	3	2	3	3	3	2	3	8.6	8.6	8.6	40.094	362	3	3	2	3	8.94e-28	4834100	2319500	1496400	642910	375290	3077400	2052600	555620	319750	4
179	19;42;77;143;144;146;176;191;218;219;220;285;289;293;301;312;353;404;448;543;546;567;621;651;688;696;715;731;753;761;762;785;804;811;823;894;931;984;996;1064;1105;1106;1113;1165;1168;1171;1180;1196;1198;1221;1224;1230;1240;1259;1292;1294;1295;1307;1345;1349;1351;1375;1395;1433;1440;1451;1454;1494;1499;1502;1506;1514;1519;1527;1535;1541;1543;1550;1559;1607;1618;1669;1690;1696;1706;1713;1717;1742;1…	31;32;33	1058;2042;2508	IPI00022229;CON__ENSEMBL:ENSBTAP00000032840	IPI00022229	IPI00022229	168;3	168;3	133;0	Apolipoprotein B-100;Apolipoprotein B-48;cDNA FLJ77094, highly similar to Homo sapiens apolipoprotein B (including Ag(x) antigen) (APOB), mRNA;Apolipoprotein B (Including Ag(X) antigen);Apolipoprotein B (Including Ag(X) antigen), isoform CRA_a;APOB protein;Apolipoprotein B;Apolipoprotein B-100 gene intron Bi and flanking regions;Putative uncharacterized protein APOB;Apolipoprotein B variant;Apoli…	APOB;hCG_20898	Apolipoprotein B-100	P04114;A8K479;C0JYY2;P78482;Q13789;Q13828;Q4ZG63;Q53QC8;Q59HB3;Q9UE51;Q9UE52;Q9UE53	2	168	168	133	161	160	161	159	161	160	161	159	126	125	127	124	47	47	38.7	515.56	4563	190	182	187	185	0	498050000	70897000	93276000	262130000	71753000	73741000	117300000	297680000	95867000	4
180	845;1021;1097;1538;1586;1772;2292;2491;2665;2723;2732;2869;3184			IPI00022275;IPI00924492;IPI00927495;IPI00926992;IPI00927252;IPI00927452	IPI00022275;IPI00924492	IPI00022275	13;11;6;5;3;1	13;11;6;5;3;1	13;11;6;5;3;1	Phosphatidylinositide phosphatase SAC1;Suppressor of actin mutations 1-like protein;cDNA FLJ55660, highly similar to Homo sapiens SAC1 suppressor of actin mutations 1-like (SACM1L), mRNA;cDNA FLJ53218, highly similar to Homo sapiens SAC1 suppressor of actin mutations 1-like (SACM1L), mRNA;cDNA FLJ44470 fis, clone UTERU2026203, highly similar to Homo sapiens SAC1 suppressor of actin mutations 1-li…	KIAA0851;SACM1L	Phosphatidylinositide phosphatase SAC1;cDNA FLJ44470 fis, clone UTERU2026203, highly similar to Homo sapiens SAC1 suppressor of actin mutations 1-like (SACM1L), mRNA	Q9NTJ5;B4DK71;B4DVV3;B3KX17	6	13	13	13	13	12	10	11	13	12	10	11	13	12	10	11	26.2	26.2	26.2	66.966	587	14	13	11	12	2.21e-68	10134000	4593400	3184800	1504700	851000	6096000	4362300	1139400	988420	4
181	1107			IPI00022295;IPI00022446	IPI00022295;IPI00022446	IPI00022295	1;1	1;1	1;1	C-X-C motif chemokine 4 variant;CXCL4L1;PF4alt;PF4var1;Platelet factor 4 variant;Platelet factor 4 variant(4-74);Platelet factor 4 variant(5-74);Platelet factor 4 variant(6-74);C-X-C motif chemokine 4;Iroplact;Oncostatin-A;Platelet factor 4;Platelet factor 4, short form	CXCL4V1;PF4V1;SCYB4V1;CXCL4;PF4;SCYB4	Platelet factor 4 variant;Platelet factor 4	P10720;A1L4S0;P02776	2	1	1	1	1	1	1	1	1	1	1	1	1	1	1	1	8.7	8.7	8.7	11.553	104	1	1	1	1	1.27e-05	55073000	14110000	11740000	20492000	8731500	17106000	14851000	21828000	13088000	4
182	96;299;878;886;887;1102;1815;2315			IPI00022314;IPI00847322;IPI00607577;IPI00911015	IPI00022314;IPI00847322;IPI00607577	IPI00022314	8;8;7;3	8;8;7;3	8;8;7;3	Superoxide dismutase [Mn], mitochondrial;Superoxide dismutase	SOD2	Superoxide dismutase [Mn], mitochondrial;superoxide dismutase 2, mitochondrial isoform A precursor;superoxide dismutase 2, mitochondrial isoform B precursor	P04179;B3KUK2;Q7Z7M4;Q7Z7M7;Q4ZJI1;Q7Z7M5;Q7Z7M6;B4DL20	4	8	8	8	7	7	7	5	7	7	7	5	7	7	7	5	35.6	35.6	35.6	24.722	222	10	10	10	7	8.6e-84	21151000	8803200	6820100	4298900	1228900	12724000	9082800	2687400	1336000	4
185	424;425;926;969;970;1429;2077;2140;2141	34	205	IPI00022392;IPI00844400;IPI00385863	IPI00022392;IPI00844400	IPI00022392	9;6;4	9;6;4	9;6;4	Complement C1q subcomponent subunit A	C1QA	Complement C1q subcomponent subunit A;23 kDa protein	P02745	3	9	9	9	5	5	9	6	5	5	9	6	5	5	9	6	36.7	36.7	36.7	26.016	245	20	20	30	20	2.55e-165	408650000	28825000	4617100	364030000	11178000	32235000	3324200	384650000	2606600	4
187	87;1052;1775;3053			IPI00022395;CON__Q3MHN2	IPI00022395;CON__Q3MHN2	IPI00022395	4;2	4;2	4;2	Complement component C9;Complement component C9a;Complement component C9b;Complement component 9	C9	Complement component C9;>Q3MHN2 SWISS-PROT:Q3MHN2 (Bos taurus) Complement component C9 precursor	P02748;Q9UGI4;Q3MHN2	2	4	4	4	4	4	4	4	4	4	4	4	4	4	4	4	10.4	10.4	10.4	63.173	559	4	4	4	4	2.65e-41	5499900	848310	763240	2373000	1515400	857510	776500	2746200	2440200	4
189	381;454;575;654;760;829;831;865;877;1163;1347;1358;1393;1810;2055;2093;2105;2175;2304;2358;2544;2558;2591;2626;2653;2693;2798;2833;2974;3031;3045;3071;3107;3113;3150			IPI00022418;IPI00339223;IPI00339228;IPI00855777;IPI00414283;IPI00339225;IPI00855785;IPI00339227;IPI00845263;IPI00339224;IPI00867588;IPI00479723;IPI00339226;IPI00339319;IPI00873210;IPI00556632;IPI00922213;IPI00856050;IPI00383776	IPI00022418;IPI00339223;IPI00339228;IPI00855777;IPI00414283;IPI00339225;IPI00855785;IPI00339227;IPI00845263;IPI00339224;IPI00867588;IPI00479723;IPI00339226;IPI00339319;IPI00873210;IPI00556632;IPI00922213	IPI00022418	35;35;35;35;35;35;34;34;34;34;34;34;33;31;30;29;21;5;2	35;35;35;35;35;35;34;34;34;34;34;34;33;31;30;29;21;5;2	34;34;34;34;34;34;33;33;33;33;33;33;32;30;29;28;21;5;2	Anastellin;Cold-insoluble globulin;Fibronectin;Ugl-Y1;Ugl-Y2;Ugl-Y3;Fibronectin splice variant E;Fibronectin splice variant A;Putative uncharacterized protein DKFZp686O13149;Fibronectin splice variant C;Fibronectin 1 variant;Putative uncharacterized protein DKFZp686L11144;cDNA FLJ54550, highly similar to Homo sapiens fibronectin 1 (FN1), transcript variant 6, mRNA;Fibronectin splice variant D;Put…	FN;FN1;DKFZp686O13149;DKFZp686L11144;DKFZp686O12165;DKFZp686I1370;hCG_1813428	Isoform 1 of Fibronectin;Isoform 3 of Fibronectin;Isoform 8 of Fibronectin;Isoform 14 of Fibronectin;Isoform 9 of Fibronectin;Isoform 5 of Fibronectin;Isoform 15 of Fibronectin;Isoform 7 of Fibronectin;fibronectin 1 isoform 2 preproprotein;fibronectin 1 is	P02751-1;P02751;A6YID6;P02751-3;A6YID2;O95617;Q68CX6;P02751-8;P02751-14;A6YID4;Q59G22;Q6N084;P02751-9;B4DU16;P02751-5;A6YID5;P02751-15;P02751-7;Q6MZM7;Q14328;P02751-4;A6YID3;Q5CZ99;Q9UQS6;P02751-13;P02751-10;B4DN21;B7ZLE5;B7ZLF0;P02751-6;P02751-11;P02751-12;B4DTH2;B4DTK1;Q14327;Q53S27;Q6PJE5;Q7L553;Q9H382	19	35	35	34	34	35	33	35	34	35	33	35	33	34	32	34	24.1	24.1	23.7	262.6	2386	42	45	41	42	0	164150000	64703000	56738000	23712000	19000000	85278000	80866000	17848000	22559000	4
190	818;3245			IPI00022420;IPI00844536;IPI00480192	IPI00022420;IPI00844536;IPI00480192	IPI00022420	2;2;2	2;2;2	2;2;2	Plasma retinol-binding protein;Plasma retinol-binding protein(1-176);Plasma retinol-binding protein(1-179);Plasma retinol-binding protein(1-181);Plasma retinol-binding protein(1-182);Retinol-binding protein 4;Putative uncharacterized protein RBP4;Retinol binding protein 4, plasma, isoform CRA_b;Retinol binding protein 4, plasma	PRO2222;RBP4;hCG_37964;RP11-30E16.3-002	Retinol-binding protein 4;Retinol binding protein 4, plasma, isoform CRA_b;Retinol binding protein 4, plasma	P02753;A6NCP9;Q5VY30	3	2	2	2	2	2	0	2	2	2	0	2	2	2	0	2	10	10	10	23.01	201	2	2		2	2.61e-05	1416400	310490	305490	0	800450	171140	175450	0	1708500	3
192	824;1148;1149			IPI00022431;IPI00953689;IPI00795830;IPI00922262	IPI00022431;IPI00953689;IPI00795830;IPI00922262	IPI00022431	3;3;2;2	3;3;2;2	3;3;2;2	cDNA FLJ55606, highly similar to Alpha-2-HS-glycoprotein;Putative uncharacterized protein AHSG;Alpha-2-HS-glycoprotein;Alpha-2-HS-glycoprotein chain A;Alpha-2-HS-glycoprotein chain B;Alpha-2-Z-globulin;Ba-alpha-2-glycoprotein;Fetuin-A;cDNA FLJ56822, highly similar to Alpha-2-HS-glycoprotein	AHSG;FETUA;PRO2743	cDNA FLJ55606, highly similar to Alpha-2-HS-glycoprotein;Alpha-2-HS-glycoprotein;29 kDa protein;cDNA FLJ56822, highly similar to Alpha-2-HS-glycoprotein	B7Z8Q2;C9JV77;P02765;B7Z556	4	3	3	3	3	3	3	3	3	3	3	3	3	3	3	3	8.5	8.5	8.5	46.626	433	4	4	4	4	1.89e-35	17092000	1545200	5379800	1472400	8695000	1085100	6185500	747790	16262000	4
195	97;317;432;519;522;545;560;1133;1146;1284;1412;1983;2392;2503;2602;3191			IPI00022463;IPI00798430;IPI00792626;IPI00945626;IPI00796467;IPI00789295;IPI00791330;IPI00945828;IPI00798216;IPI00945308;IPI00789954	IPI00022463	IPI00022463	16;4;3;2;2;2;2;1;1;1;1	16;4;3;2;2;2;2;1;1;1;1	16;4;3;2;2;2;2;1;1;1;1	Beta-1 metal-binding globulin;Serotransferrin;Siderophilin;TF protein;cDNA FLJ56687, highly similar to Serotransferrin;cDNA FLJ54029, highly similar to Serotransferrin;Transferrin, isoform CRA_c;cDNA FLJ54111, highly similar to Serotransferrin;cDNA FLJ53691, highly similar to Serotransferrin;Transferrin;Transferrin variant	PRO1400;TF;hCG_2023558	Serotransferrin	P02787;A0PJA6;B4DEX9;B4DHZ6;B4DI57;B4E1B2;Q06AH7;Q53H26	11	16	16	16	14	15	13	16	14	15	13	16	14	15	13	16	30.4	30.4	30.4	77.049	698	18	21	17	22	3.67e-199	108770000	20332000	28427000	7703100	52303000	22138000	33073000	4210700	93686000	4
196	324;721;884;923;1873;1881;2015;2212;2354;2434;3075;3084			IPI00022488;IPI00922564;CON__Q3SZV7	IPI00022488	IPI00022488	12;4;1	12;4;1	12;4;1	Beta-1B-glycoprotein;Hemopexin;HPX protein	HPX	Hemopexin	P02790;Q9BS19	3	12	12	12	12	12	12	12	12	12	12	12	12	12	12	12	28.8	28.8	28.8	51.676	462	16	14	13	15	1.6e-64	28860000	3729500	5381900	2438600	17310000	3731600	6041400	1667200	30228000	4
198	1000;1231;1377;1461;1995	38	550	IPI00022774;IPI00915799;IPI00916175	IPI00022774	IPI00022774	5;1;1	5;1;1	5;1;1	15S Mg(2+)-ATPase p97 subunit;Transitional endoplasmic reticulum ATPase;Valosin-containing protein;VCP protein;Putative uncharacterized protein DKFZp434K0126	VCP;DKFZp434K0126	Transitional endoplasmic reticulum ATPase	P55072;Q0IIN5;Q96IF9;Q9HAP0;Q9HAP1;Q9NTC4	3	5	5	5	5	5	5	5	5	5	5	5	5	5	5	5	12.2	12.2	12.2	89.321	806	6	6	6	6	8.62e-37	2322300	514960	395490	966120	445730	503310	554120	1195500	565980	4
199	1885			IPI00022793;IPI00383695	IPI00022793;IPI00383695	IPI00022793	1;1	1;1	1;1	3-ketoacyl-CoA thiolase;Acetyl-CoA acyltransferase;Beta-ketothiolase;TP-beta;Trifunctional enzyme subunit beta, mitochondrial;cDNA FLJ59448, highly similar to Trifunctional enzyme subunit beta, mitochondrial;cDNA FLJ55769, highly similar to Trifunctional enzyme subunit beta, mitochondrial;cDNA FLJ56214, highly similar to Trifunctional enzyme subunit beta, mitochondrial;Mitochondrial trifunctional…	HADHB;MSTP029	Trifunctional enzyme subunit beta, mitochondrial;Mitochondrial trifunctional protein beta subunit (Fragment)	P55084;B4DDC9;B4DY96;B4E2W0;Q92799	2	1	1	1	1	1	1	1	1	1	1	1	1	1	1	1	1.9	1.9	1.9	51.294	474	1	1	1	1	0.0055563	473600	208330	152370	81636	31263	392160	114830	47054	28815	4
200	223;1070;1129;1548;2026;2440;2489;2585;2737			IPI00022895;IPI00644018;IPI00646799;CON__Q2KJF1;IPI00902880	IPI00022895	IPI00022895	9;4;3;1;1	9;4;3;1;1	9;4;3;1;1	Alpha-1-B glycoprotein;Alpha-1B-glycoprotein	A1BG	Alpha-1B-glycoprotein	P04217;A8K052	5	9	9	9	9	7	5	9	9	7	5	9	9	7	5	9	26.7	26.7	26.7	54.272	495	10	8	6	11	8.38e-73	9122400	2023000	1039800	322120	5737600	1065000	1731900	501480	10006000	4
201	44;189;245;254;257;544;549;626;657;658;890;893;1670;1694;1755;1949;1982;2012;2138;2159;2183;2186;2223;2301;2411;2521;2586;2590;2792;2794;3190;3258			IPI00022937;IPI00478809;IPI00953390	IPI00022937;IPI00478809	IPI00022937	32;32;1	32;32;1	23;23;1	Activated protein C cofactor;Coagulation factor V;Coagulation factor V heavy chain;Coagulation factor V light chain;Proaccelerin, labile factor;cDNA FLJ50218, highly similar to Coagulation factor V;Mutant coagulation factor V;Coagulation factor V jinjiang A2 domain	F5;factor V	252 kDa protein;Coagulation factor V	P12259;B4DU26;C8C1T0;C8C1T1;Q15430;Q1L610;Q2HZY9;Q2HZZ0;Q2HZZ1;Q8TD21;Q8WWQ7;Q9P1A8	3	32	32	23	31	30	23	24	31	30	23	24	22	22	16	18	17.9	17.9	13.5	252.2	2229	32	31	23	25	2.29e-275	33715000	17223000	8016400	5939700	2536100	23265000	11167000	3636200	3242600	4
202	59;234;235;383;580;936;1130;1381;1493;1525;2324;2587;3215;3227	6;8;10;39	84;192;327;357	IPI00023006;IPI00930343;IPI00008603;IPI00025416;IPI00021428;IPI00922693;IPI00954527;IPI00514530;IPI00414057;IPI00921887;IPI00645534;IPI00917820;IPI00917457;IPI00917282	IPI00023006;IPI00930343;IPI00008603;IPI00025416;IPI00021428;IPI00922693;IPI00954527;IPI00514530;IPI00414057;IPI00921887;IPI00645534;IPI00917820;IPI00917457;IPI00917282	IPI00023006	14;13;13;13;12;12;11;10;9;7;7;7;7;7	1;1;1;1;1;1;1;1;1;1;1;1;1;1	1;1;1;1;1;1;1;1;1;1;1;1;1;1	Actin, alpha cardiac muscle 1;Alpha-cardiac actin;cDNA FLJ78096, highly similar to Homo sapiens actin, alpha, cardiac muscle (ACTC), mRNA;Actin, aortic smooth muscle;Alpha-actin-2;Cell growth-inhibiting gene 46 protein;cDNA FLJ32030 fis, clone NTONG2000040, highly similar to Actin, alpha cardiac;cDNA FLJ52761, highly similar to Actin, aortic smooth muscle;Actin-like protein;Actin, gamma-enteric s…	ACTC;ACTC1;ACTA2;ACTSA;ACTVS;GIG46;ACT;ACTA3;ACTG2;ACTL3;ACTSG;ACTA;ACTA1;RP5-1068B5.2-003;RP11-399O19.2-002	Actin, alpha cardiac muscle 1;cDNA FLJ78096, highly similar to Homo sapiens actin, alpha, cardiac muscle (ACTC), mRNA;Actin, aortic smooth muscle;Actin, gamma-enteric smooth muscle;Actin, alpha skeletal muscle;cDNA FLJ53662, highly similar to Actin, alpha	P68032;A8K3K1;P62736;B3KPP5;B4DUI8;Q562S2;P63267;B3KW67;P68133;B7Z6P1;Q13707;A6NL76;Q5T8M8;Q7Z7J6;B7Z6I1;Q5T9N7;C9JFL5;B8ZZJ2;C9JAR9	14	14	1	1	13	14	13	13	1	1	1	1	1	1	1	1	34.7	4.2	4.2	42.019	377	4	4	3	3	1.13e-143	440150000	118020000	96696000	143910000	81525000	145030000	123350000	146590000	128500000	4
203	53;78;139;542;553;1109;1115;1194;1225;1248;1632;1754;1856;2350;2361;2902;3132;3180;3232			IPI00023014;IPI00788786;IPI00654729	IPI00023014;IPI00788786	IPI00023014	19;19;6	19;19;6	19;19;6	von Willebrand antigen 2;von Willebrand antigen II;von Willebrand factor;cDNA FLJ75522, highly similar to Homo sapiens von Willebrand factor (VWF), mRNA;cDNA FLJ59036, highly similar to von Willebrand factor;cDNA FLJ51654, highly similar to von Willebrand factor;Putative uncharacterized protein VWF	F8VWF;VWF	von Willebrand factor;cDNA FLJ59036, highly similar to von Willebrand factor	P04275;A8K7V7;B4DMS3;B4DNX0;C9J2Y6	3	19	19	19	19	18	18	17	19	18	18	17	19	18	18	17	9.1	9.1	9.1	309.26	2813	20	19	20	18	2.3e-150	21723000	7162800	7661600	5054300	1844400	8942800	11319000	4137200	2287300	4
205	193;232;610;1183;1396;2332;2400;2481;2712;2839;3226;3248			IPI00023673;IPI00902654;IPI00908762;IPI00796246;IPI00794873	IPI00023673;IPI00902654;IPI00908762	IPI00023673	12;10;8;2;2	12;10;8;2;2	12;10;8;2;2	Basement membrane autoantigen p105;Galectin-3-binding protein;Lectin galactoside-binding soluble 3-binding protein;Mac-2-binding protein;Tumor-associated antigen 90K;cDNA FLJ53478, highly similar to Galectin-3-binding protein;cDNA FLJ53427, highly similar to Galectin-3-binding protein;cDNA FLJ31415 fis, clone NT2NE2000284, highly similar to Galectin-3-binding protein;cDNA FLJ54583, highly similar…	LGALS3BP;M2BP	Galectin-3-binding protein;cDNA FLJ54583, highly similar to Galectin-3-binding protein;cDNA FLJ53509, highly similar to Galectin-3-binding protein	Q08380;B4DVE1;B4DWA8;B3KP88;B4DDG4;B4DI70	5	12	12	12	5	10	12	7	5	10	12	7	5	10	12	7	23.9	23.9	23.9	65.33	585	6	13	16	7	5.07e-187	163680000	414650	2991400	159770000	507370	69720	1121200	163700000	99349	4
206	810;939;2113;3137			IPI00023860;IPI00797545;IPI00789029;IPI00902909;IPI00922322	IPI00023860;IPI00797545;IPI00789029;IPI00902909	IPI00023860	4;4;4;4;1	4;4;4;4;1	4;4;4;4;1	NAP-1-related protein;Nucleosome assembly protein 1-like 1;cDNA FLJ58569, highly similar to Nucleosome assembly protein 1-like 1;cDNA FLJ60539, highly similar to Nucleosome assembly protein 1-like 1;cDNA FLJ30458 fis, clone BRACE2009421, highly similar to NUCLEOSOME ASSEMBLY PROTEIN 1-LIKE 1;cDNA FLJ16112 fis, clone 3NB692001853, highly similar to NUCLEOSOME ASSEMBLY PROTEIN 1-LIKE 1;Nucleosome a…	NAP1L1;NRP;hCG_2015037	Nucleosome assembly protein 1-like 1;cDNA FLJ60539, highly similar to Nucleosome assembly protein 1-like 1;cDNA FLJ30458 fis, clone BRACE2009421, highly similar to NUCLEOSOME ASSEMBLY PROTEIN 1-LIKE 1;Nucleosome assembly protein 1-like 1, isoform CRA_c	P55209;B7Z9C2;B7Z2V4;B3KNT8;B3KV44;B7Z4K9	5	4	4	4	4	4	4	4	4	4	4	4	4	4	4	4	17.6	17.6	17.6	45.374	391	4	4	4	4	3.3e-22	6111400	1476800	1026900	2372300	1235400	2031800	1195000	2300600	1949700	4
207	2;49;112;173;278;452;722;793;802;1008;1121;1333;1367;1389;1401;1423;1480;1496;1512;1636;1659;2049;2053;2069;2360;2564;2572;2714;2815;2880;2950;3058;3099;3105;3173			IPI00024067;IPI00455383;IPI00022881;IPI00300446;IPI00385931	IPI00024067;IPI00455383	IPI00024067	35;35;8;8;2	35;35;8;8;2	35;35;8;8;2	Clathrin heavy chain 1;Clathrin heavy chain on chromosome 17	CLH17;CLTC;CLTCL2;KIAA0034	Isoform 1 of Clathrin heavy chain 1;Isoform 2 of Clathrin heavy chain 1	Q00610-1;Q00610;Q00610-2	5	35	35	35	34	31	30	27	34	31	30	27	34	31	30	27	31.5	31.5	31.5	191.61	1675	37	32	32	29	4.71e-295	33428000	13403000	7998400	8411700	3615700	18282000	10153000	7580100	4849400	4
209	1255			IPI00024466;IPI00619903	IPI00024466;IPI00619903	IPI00024466	1;1	1;1	1;1	UDP--Glc:glycoprotein glucosyltransferase;UDP-glucose ceramide glucosyltransferase-like 1;UDP-glucose:glycoprotein glucosyltransferase 1;cDNA FLJ77398, highly similar to Homo sapiens UDP-glucose ceramide glucosyltransferase-like 1, transcript variant 2, mRNA	GT;UGCGL1;UGGT;UGGT1;UGT1;UGTR	Isoform 1 of UDP-glucose:glycoprotein glucosyltransferase 1;Isoform 2 of UDP-glucose:glycoprotein glucosyltransferase 1	Q9NYU2-1;Q9NYU2;A8KAK1;Q9NYU2-2	2	1	1	1	1	1	1	1	1	1	1	1	1	1	1	1	0.9	0.9	0.9	177.19	1555	1	1	1	1	0.00016811	91088	26309	18706	28957	17116	33086	23292	29172	27061	4
210	659			IPI00024915;IPI00375306;IPI00759663;IPI00375307	IPI00024915;IPI00375306;IPI00759663;IPI00375307	IPI00024915	1;1;1;1	1;1;1;1	1;1;1;1	Alu corepressor 1;Antioxidant enzyme B166;Liver tissue 2D-page spot 71B;Peroxiredoxin V;Peroxiredoxin-5, mitochondrial;Peroxisomal antioxidant enzyme;PLP;Thioredoxin peroxidase PMP20;Thioredoxin reductase;TPx type VI;Putative uncharacterized protein PRDX5;Peroxiredoxin 5	ACR1;PRDX5;SBBI10	Isoform Mitochondrial of Peroxiredoxin-5, mitochondrial;peroxiredoxin 5 isoform b precursor;Isoform Cytoplasmic+peroxisomal of Peroxiredoxin-5, mitochondrial;peroxiredoxin 5 isoform c precursor	P30044-1;P30044;A6NG06;B7ZLJ4;P30044-2;A6NC19;B7ZVW3	4	1	1	1	1	1	1	1	1	1	1	1	1	1	1	1	7.9	7.9	7.9	22.026	214	1	1	1	1	1.65e-19	218630	64057	63332	62516	28725	90376	77229	58303	42840	4
211	382;478;968;1117;2019			IPI00024919;IPI00374151	IPI00024919;IPI00374151	IPI00024919	5;5	5;5	5;5	Antioxidant protein 1;HBC189;Peroxiredoxin III;Peroxiredoxin-3;Protein MER5 homolog;Thioredoxin-dependent peroxide reductase, mitochondrial;Peroxiredoxin 3 isoform a;Peroxiredoxin 3 isoform a variant;Humer	AOP1;PRDX3;mer5	Thioredoxin-dependent peroxide reductase, mitochondrial;peroxiredoxin 3 isoform b	P30048;A4UCS5;Q53HC2;Q14579	2	5	5	5	5	5	5	5	5	5	5	5	5	5	5	5	24.2	24.2	24.2	27.692	256	5	5	5	5	3.29e-40	4481400	1675500	1460900	856530	488490	2420000	2131500	523970	499140	4
213	2804;3070			IPI00024983;IPI00216112;IPI00410134	IPI00024983;IPI00216112;IPI00410134	IPI00024983	2;2;2	2;2;2	2;2;2	Neuroendocrine-specific protein-like 1;Neuroendocrine-specific protein-like I;Reticulon-2;Reticulon 2;Reticulon 2, isoform CRA_d;Truncated RTN2-A-D8;Reticulon 2, isoform CRA_f;Truncated RTN2-B2;cDNA FLJ77166, highly similar to Homo sapiens reticulon 2 (RTN2), transcript variant 2, mRNA	NSPL1;RTN2;hCG_1996624	Isoform RTN2-A of Reticulon-2;Isoform RTN2-B of Reticulon-2;Isoform RTN2-C of Reticulon-2	O75298-1;O75298;Q6GMT0;Q7RTN0;Q96CG9;O75298-2;A8K7F2;O75298-3	3	2	2	2	2	2	0	2	2	2	0	2	2	2	0	2	3.1	3.1	3.1	59.263	545	2	2		2	0.002045	571740	305010	208590	0	58151	437390	251340	0	45947	3
217	283;409;609;839;903;1210;1688;1895;2342;2424;2596;2643;3072			IPI00025252;IPI00847663;IPI00790740;IPI00791418	IPI00025252;IPI00847663	IPI00025252	13;7;2;1	13;7;2;1	11;6;0;1	58 kDa glucose-regulated protein;58 kDa microsomal protein;Disulfide isomerase ER-60;Endoplasmic reticulum resident protein 57;Endoplasmic reticulum resident protein 60;Protein disulfide-isomerase A3;cDNA PSEC0148 fis, clone PLACE1007202, highly similar to Protein disulfide-isomerase A3 (EC 5.3.4.1);cDNA PSEC0175 fis, clone OVARC1000169, highly similar to Protein disulfide-isomerase A3 (EC 5.3.4.…	ERP57;ERP60;GRP58;PDIA3	Protein disulfide-isomerase A3;cDNA FLJ53558, highly similar to Protein disulfide-isomerase A3	P30101;B3KQT2;B3KQT9;B4DDM1;B4DJ98	4	13	13	11	12	12	10	13	12	12	10	13	10	10	8	11	34.5	34.5	29.1	56.782	505	16	16	12	16	4.77e-109	24581000	5721300	5421000	7691600	5747300	6446200	6704100	9398200	8342700	4
218	126;340;982;1373;1737			IPI00025366;IPI00793839;IPI00383539;IPI00796979;IPI00795080;IPI00791780;IPI00791211;IPI00795682;IPI00792509	IPI00025366;IPI00793839;IPI00383539	IPI00025366	5;4;4;1;1;1;1;1;1	5;4;4;1;1;1;1;1;1	5;4;4;1;1;1;1;1;1	Citrate synthase, mitochondrial;Citrate synthase	CS	Citrate synthase, mitochondrial;48 kDa protein;Citrate synthase	O75390;B4DJV2;B3KTN4;Q0QEL2	9	5	5	5	5	5	5	5	5	5	5	5	5	5	5	5	13.1	13.1	13.1	51.712	466	5	5	5	5	7.93e-36	4961800	1886500	1540400	1083600	451260	2491500	2146900	977700	485270	4
219	50;222;1977;2083;2447;2538;3172			IPI00025426;IPI00884981;IPI00922117	IPI00025426;IPI00884981	IPI00025426	7;7;1	1;1;0	1;1;0	C3 and PZP-like alpha-2-macroglobulin domain-containing protein 6;Pregnancy zone protein;cDNA, FLJ94213, highly similar to Homo sapiens pregnancy-zone protein (PZP), mRNA	CPAMD6;PZP	Isoform 1 of Pregnancy zone protein;Isoform 2 of Pregnancy zone protein	P20742-1;P20742;B2R950;P20742-2;A6ND27	3	7	1	1	5	5	3	7	0	0	0	1	0	0	0	1	5.7	0.9	0.9	163.86	1482				1	3.67e-46	84459	0	0	0	84459	0	0	0	135060	1
220	1553;3013			IPI00025512;IPI00924436;IPI00909453	IPI00025512;IPI00924436;IPI00909453	IPI00025512	2;2;1	2;2;1	2;2;1	28 kDa heat shock protein;Estrogen-regulated 24 kDa protein;Heat shock 27 kDa protein;Heat shock protein beta-1;Stress-responsive protein 27;cDNA FLJ52243, highly similar to Heat-shock protein beta-1;Putative uncharacterized protein HSPB1	HSP27;HSP28;HSPB1	Heat shock protein beta-1;Putative uncharacterized protein HSPB1;cDNA FLJ52243, highly similar to Heat-shock protein beta-1	P04792;C9JLY6;B4DL87;C9J3N8	3	2	2	2	2	2	2	2	2	2	2	2	2	2	2	2	12.7	12.7	12.7	22.782	205	2	2	2	2	5.21e-06	2881200	598830	507430	1200700	574220	659210	484650	1485800	877240	4
222	832;882;1182;1340;1497;1708;2261;2370;2668;3024			IPI00025874;IPI00793589;IPI00945851	IPI00025874;IPI00793589	IPI00025874	10;8;4	10;8;4	10;8;4	Dolichyl-diphosphooligosaccharide--protein glycosyltransferase 67 kDa subunit;Dolichyl-diphosphooligosaccharide--protein glycosyltransferase subunit 1;Ribophorin I;Ribophorin-1;Ribophorin I variant;RPN1 protein;Similar to ribophorin I;cDNA FLJ51740, highly similar to Dolichyl-diphosphooligosaccharide--proteinglycosyltransferase 67 kDa subunit (EC 2.4.1.119);cDNA FLJ51908, highly similar to Dolich…	RPN1	Dolichyl-diphosphooligosaccharide--protein glycosyltransferase subunit 1 precursor;cDNA FLJ51740, highly similar to Dolichyl-diphosphooligosaccharide--proteinglycosyltransferase 67 kDa subunit	P04843;Q53EP4;Q6IBR0;Q96HX3;B4DL99;B4DNJ5;B7Z4L4	3	10	10	10	10	9	9	9	10	9	9	9	10	9	9	9	22.3	22.3	22.3	72.777	646	10	9	9	9	5.03e-59	8109900	3488700	2376200	1284400	960560	5155500	2935500	903090	1153400	4
225	1383;1612;1676;2417			IPI00026268;IPI00639998;IPI00640949;IPI00640462	IPI00026268;IPI00639998;IPI00640949;IPI00640462	IPI00026268	4;4;4;4	4;4;4;4	1;1;1;1	Guanine nucleotide-binding protein G(I)/G(S)/G(T) subunit beta-1;Transducin beta chain 1;cDNA, FLJ92996, highly similar to Homo sapiens guanine nucleotide binding protein (G protein), beta polypeptide 1 (GNB1), mRNA;cDNA FLJ16663 fis, clone THYMU2005759, highly similar to Guanine nucleotide-binding proteinG(I)/G(S)/G(T) subunit beta 1;GNB1 protein;Beta-subunit signal transducing proteins GS/GI;Gu…	GNB1;RP1-283E3.7-007;RP1-283E3.7-005;RP1-283E3.7-006	Guanine nucleotide-binding protein G(I)/G(S)/G(T) subunit beta-1;Guanine nucleotide binding protein (G protein), beta polypeptide 1;Guanine nucleotide binding protein (G protein), beta polypeptide 1;Guanine nucleotide binding protein (G protein), beta poly	P62873;B2R6K4;B3KVK2;Q1RMY8;Q71UM6;B1AKQ9;B1AKQ7;C9JI54;B1AKQ8	4	4	4	1	4	4	4	3	4	4	4	3	1	1	1	0	13.5	13.5	4.1	37.377	340	4	4	4	3	7.86e-28	11721000	4660800	3942400	1961600	1155800	5797800	5621900	1489100	1693800	4
226	55;63;177;405;442;628;680;719;1158;1197;2129;2143;2168;2284;2379;2608;2649;2741;2887;2888;2970;2972;2987;3015;3177;3178			IPI00026314;IPI00647556;IPI00513782;CON__Q3SX14;IPI00377087	IPI00026314;IPI00647556;IPI00513782	IPI00026314	26;25;14;12;7	26;25;14;12;7	1;0;0;0;0	Actin-depolymerizing factor;AGEL;Brevin;Gelsolin;cDNA FLJ56154, highly similar to Gelsolin;cDNA FLJ56212, highly similar to Gelsolin;cDNA, FLJ96557, Homo sapiens gelsolin (amyloidosis, Finnish type) (GSN), mRNA;Gelsolin (Amyloidosis, Finnish type);Gelsolin (Amyloidosis, Finnish type), isoform CRA_c;cDNA FLJ53332, highly similar to Gelsolin;Gelsolin (Amyloidosis, Finnish type), isoform CRA_b;Putat…	GSN;hCG_27454;RP11-477J21.1-001;RP11-477J21.1-003;DKFZp313L0718;RP11-477J21.1-005	Isoform 1 of Gelsolin;gelsolin isoform c;cDNA FLJ35478 fis, clone SMINT2007796, highly similar to Gelsolin	P06396-1;P06396;B7Z6N2;B7Z9A0;Q5T0I2;B7Z373;B7Z5V1;Q5T0I1;Q69YR8;B3KS49;Q5T0H9	5	26	26	1	26	26	23	25	26	26	23	25	1	1	1	1	43.2	43.2	2.3	85.696	782	37	35	32	34	0	205860000	63747000	57676000	50995000	33444000	83234000	79233000	46250000	48284000	4
227	784;3062			IPI00026519;IPI00552916;IPI00657779;IPI00457283;REV__IPI00788246	IPI00026519;IPI00552916;IPI00657779;IPI00457283;REV__IPI00788246	IPI00026519	2;2;2;1;1	2;2;2;1;1	2;2;2;1;1	Cyclophilin F;Peptidyl-prolyl cis-trans isomerase F, mitochondrial;Rotamase F;Peptidyl-prolyl cis-trans isomerase;Fc receptor homolog expressed in B cells protein 2;Fc receptor-like and mucin-like protein 2;Fc receptor-like B;Fc receptor-like protein 2;Fc receptor-related protein Y	CYP3;PPIF;RP11-342M3.4-004;hCG_22611;FCRL2;FCRLB;FCRLM2;FCRY;FREB2	Peptidyl-prolyl cis-trans isomerase, mitochondrial;Peptidylprolyl isomerase F;Peptidylprolyl isomerase F (Cyclophilin F), isoform CRA_a;Isoform 1 of Fc receptor-like B;>IPI:IPI00788246.1|VEGA:OTTHUMP00000071918 Tax_Id=9606 Gene_Symbol=- 19 kDa protein	P30405;B2R6X6;Q5JSI1;Q2YDB7;Q6BAA4-1;Q6BAA4	5	2	2	2	1	2	2	2	1	2	2	2	1	2	2	2	7.2	7.2	7.2	22.04	207	1	2	2	2	0.0014579	2881100	812150	1077300	625860	365820	1247300	1426600	508450	419450	4
228	166;318;749;2582;3087;3129;3155			IPI00026569;IPI00644748;IPI00829792	IPI00026569;IPI00644748;IPI00829792	IPI00026569	7;7;7	1;1;1	1;1;1	HLA class I histocompatibility antigen, A-1 alpha chain;MHC class I antigen A*1;MHC class I antigen;cDNA, FLJ79261, highly similar to HLA class I histocompatibility antigen, A-1alpha chain;Major histocompatibility complex, class I, A;Aw-36;HLA class I histocompatibility antigen, A-36 alpha chain;MHC class I antigen A*36;HLA class I histocompatibility antigen, A-1 alpha chain variant;Leukocyte ant…	HLA-A;HLAA;DAAP-388C10.1-001;XXbac-BCX67J3.5-001;DAAP-388C10.1-002;XXbac-BCX67J3.5-002;HLA-A null;DAAP-388C10.1-003;XXbac-BCX67J3.5-003	HLA class I histocompatibility antigen, A-1 alpha chain;HLA class I histocompatibility antigen, A-36 alpha chain;Major histocompatibility complex, class I, A	P30443;A7MAP4;B7VF83;B7ZAP7;Q5MCQ6;Q5SUL5;Q95IG4;P30455;C5IWX4;Q2A689;Q59GJ2;Q5SUL4;Q5ZGM8;Q95HA5;A1Z0L4;A1Z0L7;A1Z287;A2VBX4;A4URH5;A4USG6;A4USG9;A4USH2;A4USH4;A5HKP0;A5JSG6;A5YVG8;A6H345;A7L3T0;A7WPI8;A7X516;A7X543;A7X549;A9QUT7;B3GW70;B6ECH3;B7UE87;B8YCR8;C0M145;C4PFZ0;C5IZP5;C5IZP9;C5IZQ5;C5IZR5;C5IZR6;C5J3U2;C6K4E1;C6K4E6;C6K4E9;C6K4F0;C6K4F2;C6K4F8;C6K4G5;C6K4G9;C6K4H1;C6K4H7;C6K4I4;C6K4I5;…	3	7	1	1	7	4	5	5	1	0	0	0	1	0	0	0	27.9	2.7	2.7	40.845	365	1				8.25e-100	53302	53302	0	0	0	64476	0	0	0	1
229	921;1565			IPI00026570;IPI00872879	IPI00026570;IPI00872879	IPI00026570	2;2	2;2	2;2	Cytochrome c oxidase subunit 7A2, mitochondrial;Cytochrome c oxidase subunit VIIa-liver/heart;COX7A2 protein;Cytochrome c oxidase subunit VIIa polypeptide 2 (Liver);Putative uncharacterized protein COX7A2	COX7A2;COX7AL	cytochrome c oxidase subunit VIIa polypeptide 2 (liver) precursor;Putative uncharacterized protein COX7A2	P14406;Q496I0;A8MZ71	2	2	2	2	2	2	2	2	2	2	2	2	2	2	2	2	20	20	20	12.844	115	2	2	2	2	3.13e-14	2191900	873420	795190	328750	194550	1268700	1118600	184360	164480	4
230	1980			IPI00026944;IPI00384542	IPI00026944;IPI00384542	IPI00026944	1;1	1;1	1;1	Entactin;Nidogen-1	NID;NID1	Isoform 1 of Nidogen-1;Isoform 2 of Nidogen-1	P14543-1;P14543;P14543-2	2	1	1	1	1	1	0	0	1	1	0	0	1	1	0	0	1.1	1.1	1.1	136.38	1247	1	1			0.01401	212760	133820	78943	0	0	0	103220	0	0	1
235	348;491;539;599;702;800;965;1072;1385;1492;1611;2161;2451;2453;2457;2637;2783;2788;3195;3209			IPI00027230;IPI00939289;IPI00556482;IPI00556538;IPI00910360	IPI00027230;IPI00939289	IPI00027230	20;15;5;3;3	20;15;5;3;3	19;15;5;3;2	94 kDa glucose-regulated protein;Endoplasmin;gp96 homolog;Heat shock protein 90 kDa beta member 1;Tumor rejection antigen 1;Tumor rejection antigen (Gp96) 1 variant;Tumor rejection antigen (Gp96) 1;HSP90B1 protein;cDNA FLJ58812, highly similar to Endoplasmin (Heat shock protein 90kDa beta member 1);cDNA FLJ58626, highly similar to Endoplasmin (Heat shock protein 90 kDa beta member 1)	GRP94;HSP90B1;TRA1	Endoplasmin;cDNA FLJ58626, highly similar to Endoplasmin	P14625;Q59FC6;Q5CAQ5;Q96GW1;B4DHT9;B4DU71	5	20	20	19	18	19	18	18	18	19	18	18	17	18	17	17	26.4	26.4	24.9	92.468	803	19	20	19	19	8.05e-110	18382000	5043700	4458200	5978600	2901200	6334700	5788900	5997600	4427300	4
237	180;1217;1310;1374;1392			IPI00027252;IPI00797822	IPI00027252;IPI00797822	IPI00027252	5;4	5;4	5;4	B-cell receptor-associated protein BAP37;D-prohibitin;Prohibitin-2;Repressor of estrogen receptor activity;PNAS-141;cDNA FLJ56579, highly similar to Prohibitin-2;cDNA FLJ60175, highly similar to Prohibitin-2	BAP;PHB2;REA	Prohibitin-2;cDNA FLJ56579, highly similar to Prohibitin-2	Q99623;Q9BXV3;B4DP75;B4DW05	2	5	5	5	5	5	5	3	5	5	5	3	5	5	5	3	23.1	23.1	23.1	33.296	299	5	5	5	3	1.31e-38	2417200	1073500	774840	431630	137260	1534400	1040300	204570	183520	4
238	967			IPI00027350;IPI00909207	IPI00027350;IPI00909207	IPI00027350	1;1	1;1	1;1	Natural killer cell-enhancing factor B;Peroxiredoxin-2;PRP;Thiol-specific antioxidant protein;Thioredoxin peroxidase 1;Thioredoxin-dependent peroxide reductase 1;cDNA FLJ60461, highly similar to Peroxiredoxin-2 (EC 1.11.1.15)	NKEFB;PRDX2;TDPX1	Peroxiredoxin-2;cDNA FLJ60461, highly similar to Peroxiredoxin-2	P32119;B4DF70	2	1	1	1	1	1	0	1	1	1	0	1	1	1	0	1	4	4	4	21.892	198	1	1		1	0.081489	451760	209370	106460	0	135930	310020	117040	0	182780	3
242	1403;2819;3029			IPI00027438;IPI00892872;IPI00935169;IPI00894029;IPI00893518;IPI00791583;IPI00827631;IPI00941052;IPI00942383;IPI00893347;IPI00894145;IPI00789691;IPI00792079;IPI00892615;IPI00893481;IPI00894525;IPI00893081;IPI00892989	IPI00027438;IPI00892872;IPI00935169;IPI00894029;IPI00893518	IPI00027438	3;3;3;2;2;1;1;1;1;1;1;1;1;1;1;1;1;1	3;3;3;2;2;1;1;1;1;1;1;1;1;1;1;1;1;1	3;3;3;2;2;1;1;1;1;1;1;1;1;1;1;1;1;1	Flotillin-1;Flotillin 1 variant;FLOT1 protein;Flotillin 1;Flotillin 1, isoform CRA_b;cDNA FLJ54943, highly similar to Flotillin-1	FLOT1;DADB-118P11.2-001;DAQB-47P19.1-001;DASS-191K16.3-001;hCG_2006678;XXbac-BCX111D4.4-001;XXbac-BPG252P9.2-001;DAMC-316D20.3-001;DAMA-26D6.5-001;DAAP-285E11.3-001	Flotillin-1;cDNA FLJ54943, highly similar to Flotillin-1;Flotillin 1;Flotillin 1;Flotillin 1	O75955;Q53HQ0;Q5ST80;Q6IB58;B4DVY7;A2VCL5;B0V109;B0S8A9;B0V0H2	18	3	3	3	3	3	2	2	3	3	2	2	3	3	2	2	11.7	11.7	11.7	47.355	427	3	3	2	2	2.28e-32	1382100	642540	450330	127490	161750	823390	625510	98527	204790	4
243	1587;1842;2802;2914			IPI00027444;IPI00795490;IPI00006640;IPI00032139;IPI00032134;IPI00375668;IPI00790112;IPI00944915;IPI00657847	IPI00027444	IPI00027444	4;1;1;1;1;1;1;1;1	4;1;1;1;1;1;1;1;1	4;1;1;1;1;1;1;1;1	Leukocyte elastase inhibitor;Monocyte/neutrophil elastase inhibitor;Peptidase inhibitor 2;Serpin B1;cDNA FLJ57130, highly similar to Leukocyte elastase inhibitor;cDNA FLJ53963, highly similar to Leukocyte elastase inhibitor	ELANH2;MNEI;PI2;SERPINB1	Leukocyte elastase inhibitor	P30740;A8K5L2;B4DNT0;B4E3A8	9	4	4	4	4	4	4	4	4	4	4	4	4	4	4	4	16.9	16.9	16.9	42.741	379	4	4	4	4	1.68e-12	1999700	263330	334750	845740	555840	236420	268210	981250	1005000	4
245	1576;2032;2251;2892			IPI00027462;IPI00939362	IPI00027462;IPI00939362	IPI00027462	4;3	4;3	4;3	Calgranulin-B;Calprotectin L1H subunit;Leukocyte L1 complex heavy chain;Migration inhibitory factor-related protein 14;Protein S100-A9;S100 calcium-binding protein A9;cDNA, FLJ92148, highly similar to Homo sapiens S100 calcium binding protein A9 (calgranulin B) (S100A9), mRNA;Putative uncharacterized protein S100A9	CAGB;CFAG;MRP14;S100A9	Protein S100-A9;Putative uncharacterized protein S100A9	P06702;B2R4M6;C9J1H1	2	4	4	4	4	4	4	3	4	4	4	3	4	4	4	3	49.1	49.1	49.1	13.242	114	4	4	4	3	2.61e-23	3712200	1233600	948220	1116800	413620	1479300	1239800	1093900	697130	4
248	2882			IPI00027626;IPI00552590	IPI00027626;IPI00552590	IPI00027626	1;1	1;1	1;1	Acute morphine dependence-related protein 2;CCT-zeta-1;HTR3;T-complex protein 1 subunit zeta;Tcp20;Chaperonin subunit 6A;cDNA, FLJ94440, highly similar to Homo sapiens chaperonin containing TCP1, subunit 6A (zeta 1)(CCT6A), mRNA;cDNA FLJ52344, highly similar to T-complex protein 1 subunit zeta;cDNA, FLJ79129, highly similar to T-complex protein 1 subunit zeta;Chaperonin containing TCP1, subunit 6…	CCT6;CCT6A;CCTZ	T-complex protein 1 subunit zeta;chaperonin containing TCP1, subunit 6A isoform b	P40227;A1JUI8;B2R9K8;B4DPJ8;Q59ET3;A6NCD2;B4DN39	2	1	1	1	1	1	1	1	1	1	1	1	1	1	1	1	4	4	4	58.024	531	1	1	1	1	0.00036741	145320	27596	16190	71799	29734	29354	15993	81503	47047	4
249	1869			IPI00028031;IPI00178744;IPI00937735	IPI00028031;IPI00178744;IPI00937735	IPI00028031	1;1;1	1;1;1	1;1;1	cDNA FLJ56425, highly similar to Very-long-chain specific acyl-CoAdehydrogenase, mitochondrial (EC 1.3.99.-);Acyl-Coenzyme A dehydrogenase, very long chain variant;Very long-chain specific acyl-CoA dehydrogenase, mitochondrial;Acyl-Coenzyme A dehydrogenase, very long chain, isoform CRA_e;cDNA FLJ31521 fis, clone NT2RI2000255, highly similar to Very-long-chain specific acyl-CoAdehydrogenase, mitoc…	ACADVL;VLCAD;hCG_42007	cDNA FLJ56425, highly similar to Very-long-chain specific acyl-CoAdehydrogenase, mitochondrial;Isoform 2 of Very long-chain specific acyl-CoA dehydrogenase, mitochondrial;cDNA FLJ55801, highly similar to Very-long-chain specific acyl-CoAdehydrogenase, mito	B4DEA8;Q53HR2;P49748-2;P49748;B3KPA6;B3KPX1;P49748-1;B4DEB6	3	1	1	1	1	1	1	0	1	1	1	0	1	1	1	0	2.4	2.4	2.4	75.209	701	1	1	1		3.25e-12	75788	29144	24739	21905	0	37786	33212	18508	0	3
250	1298;1344;1623;2346			IPI00028055;IPI00911085	IPI00028055;IPI00911085	IPI00028055	4;2	4;2	4;2	21 kDa transmembrane-trafficking protein;p24delta;S31III125;Tmp-21-I;Transmembrane emp24 domain-containing protein 10;Transmembrane protein Tmp21;cDNA FLJ52032, highly similar to Transmembrane emp24 domain-containing protein 10;Full-length cDNA 5-PRIME end of clone CS0DF013YM24 of Fetal brain of Homo sapiens (Human) variant;cDNA FLJ53754, highly similar to Transmembrane emp24 domain-containing pr…	TMED10;TMP21	Transmembrane emp24 domain-containing protein 10;cDNA FLJ53754, highly similar to Transmembrane emp24 domain-containing protein 10	P49755;B2R605;B4DZH3;Q53GF9;B4DL12	2	4	4	4	4	4	1	2	4	4	1	2	4	4	1	2	22.4	22.4	22.4	24.976	219	4	4	1	2	2.16e-11	4961700	2793100	1665700	282200	220670	3911900	1983900	129950	165820	4
251	349;775;1058;1100;2307			IPI00028091;IPI00007068;IPI00554433;IPI00892652;IPI00642069;IPI00888282;IPI00946655;IPI00908396	IPI00028091	IPI00028091	5;1;1;1;1;1;1;1	5;1;1;1;1;1;1;1	5;1;1;1;1;1;1;1	Actin-like protein 3;Actin-related protein 3;cDNA FLJ51082, highly similar to Actin-like protein 3;cDNA FLJ52521, highly similar to Actin-like protein 3;cDNA FLJ51148, highly similar to Actin-like protein 3;cDNA FLJ52434, highly similar to Actin-like protein 3;cDNA, FLJ79112, highly similar to Actin-like protein 3;cDNA, FLJ79295, highly similar to Actin-like protein 3;ARP3 actin-related protein 3…	ACTR3;ARP3;hCG_26669	Actin-related protein 3	P61158;B4DT29;B4DTI0;B4DXW1;Q53QM2;Q59FV6	8	5	5	5	5	5	4	5	5	5	4	5	5	5	4	5	15.1	15.1	15.1	47.371	418	5	5	4	5	1.28e-36	9418600	2747400	2297800	2647400	1726100	2763900	3029200	3452200	2490200	4
252	2810			IPI00028120;IPI00827872;IPI00619961	IPI00028120;IPI00827872;IPI00619961	IPI00028120	1;1;1	1;1;1	1;1;1	Erythrocyte membrane protein band 4.2;cDNA FLJ50805, highly similar to Erythrocyte membrane protein band 4.2;cDNA FLJ52333, highly similar to Erythrocyte membrane protein band 4.2;EPB42 protein	E42P;EPB42	Isoform Long of Erythrocyte membrane protein band 4.2;Isoform Short of Erythrocyte membrane protein band 4.2;EPB42 protein	P16452-2;P16452;B7Z4C3;P16452-1;B7Z4Q8;Q4VB96;Q4VB97;Q4KKX0	3	1	1	1	1	1	1	1	1	1	1	1	1	1	1	1	1.8	1.8	1.8	79.926	721	1	1	1	1	7.37e-06	162590	82807	38780	18677	22325	153320	25057	9229.1	17642	4
255	534;2011;2073;2465;2758;3176			IPI00028635;IPI00383680;IPI00552972;IPI00936387;IPI00552146;IPI00552307;IPI00941764	IPI00028635;IPI00383680;IPI00552972	IPI00028635	6;6;5;2;2;2;2	6;6;5;2;2;2;2	6;6;5;2;2;2;2	Dolichyl-diphosphooligosaccharide--protein glycosyltransferase 63 kDa subunit;Dolichyl-diphosphooligosaccharide--protein glycosyltransferase subunit 2;RIBIIR;Ribophorin II;Ribophorin-2;cDNA, FLJ96923, highly similar to Homo sapiens ribophorin II (RPN2), mRNA;cDNA FLJ38924 fis, clone NT2NE2011896, highly similar to Dolichyl-diphosphooligosaccharide--protein glycosyltransferase 63 kDa subunit (EC 2…	RPN2;hCG_37142;RP3-343K2.2-003	Dolichyl-diphosphooligosaccharide--protein glycosyltransferase subunit 2;ribophorin II isoform 2 precursor;Putative uncharacterized protein RPN2	P04844;B2RE46;Q5JYR6;A6NKT1;B4DJL0	7	6	6	6	6	6	6	6	6	6	6	6	6	6	6	6	15.5	15.5	15.5	69.283	631	7	7	8	8	1.53e-99	5281000	2185800	1566000	971950	557280	3177900	2078900	681560	616440	4
257	1415;1880;3210			IPI00029046;IPI00798088	IPI00029046	IPI00029046	3;1	3;1	3;1	Malectin	KIAA0152;MLEC	Malectin	Q14165	2	3	3	3	3	2	3	2	3	2	3	2	3	2	3	2	16.4	16.4	16.4	32.233	292	3	2	3	2	1.24e-27	2096600	929500	580040	342680	244330	1436900	584580	255470	339280	4
259	1272;3275			IPI00029132;IPI00646149;IPI00844337;IPI00654849;IPI00746467	IPI00029132;IPI00646149;IPI00844337;IPI00654849;IPI00746467	IPI00029132	2;2;1;1;1	2;2;1;1;1	2;2;1;1;1	Agammaglobulinaemia tyrosine kinase;B-cell progenitor kinase;Bruton tyrosine kinase;Tyrosine-protein kinase BTK;cDNA, FLJ95155, highly similar to Homo sapiens Bruton agammaglobulinemia tyrosine kinase (BTK), mRNA;Dominant-negative kinase-deficient Brutons tyrosine kinase isoform 4;Dominant-negative kinase-deficient Brutons tyrosine kinase isoform 2;Bruton's tyrosine kinase;Bruton agammaglobulinem…	AGMX1;ATK;BPK;BTK;BTK kinase deficient isoform 4;BTK kinase deficient isoform 2;hCG_20400;RP1-164F3.2-007;BTK kinase deficient isoform 6	Tyrosine-protein kinase BTK;Bruton agammaglobulinemia tyrosine kinase, isoform CRA_b;Tyrosine-protein kinase BTK isoform 65;Dominant-negative kinase-deficient Brutons tyrosine kinase isoform 6;Dominant-negative kinase-deficient Brutons tyrosine kinase isof	Q06187;B2RAW1;Q3MS94;Q3MS96;Q9NPI2;Q9NPI3;Q9P0L3;Q9P0L5;Q9P0L6;Q9P0L7;Q9P0M0;Q5JY90;Q9P0L4;Q9P0L8;Q572P5;Q3MS92;Q3MS88	5	2	2	2	2	2	2	2	2	2	2	2	2	2	2	2	3.8	3.8	3.8	76.28	659	2	2	2	2	0.0025846	201690	24638	31685	94464	50908	23791	35634	102300	85383	4
260	2330;2660;3169			IPI00029133;IPI00456747;IPI00880198	IPI00029133	IPI00029133	3;1;1	3;1;1	3;1;1	ATP synthase subunit b, mitochondrial;cDNA FLJ78635, highly similar to Homo sapiens ATP synthase, H+ transporting, mitochondrial F0 complex, subunit b, isoform 1 (ATP5F1), transcript variant 1, mRNA;cDNA, FLJ94101, Homo sapiens ATP synthase, H+ transporting, mitochondrial F0complex, subunit b, isoform 1 (ATP5F1), mRNA;Cell proliferation-inducing protein 47;HCG39985, isoform CRA_a;ATP synthase, H+…	ATP5F1;hCG_39985	ATP synthase subunit b, mitochondrial	P24539;A8K4W2;Q08ET0;Q53GB3	3	3	3	3	3	3	3	3	3	3	3	3	3	3	3	3	17.2	17.2	17.2	28.908	256	3	3	3	3	9.8e-06	952680	312400	312240	209890	118140	550510	234100	161640	238730	4
261	843;1026;1044;1781;2733			IPI00029168;IPI00164229	IPI00029168	IPI00029168	5;1	5;1	5;1	Apolipoprotein(a);Lipoprotein, Lp(A);Antiangiogenic AK38 protein;Apolipoprotein(A)	LPA;APOA	Apolipoprotein(a)	P08519;Q1HP67;Q8N696;Q9UIR5;Q9UIR6;Q9UIR8;Q9UKJ7	2	5	5	5	4	3	5	2	4	3	5	2	4	3	5	2	1.4	1.4	1.4	501.31	4548	4	3	5	2	3.13e-15	4512200	88658	243440	4167300	12787	6280.6	25852	4580500	737.25	4
263	595			IPI00029730;IPI00797749;IPI00644806	IPI00029730;IPI00797749;IPI00644806	IPI00029730	1;1;1	1;1;1	1;1;1	Renal carcinoma antigen NY-REN-31;Syntaxin-4;cDNA FLJ34514 fis, clone HLUNG2006599, highly similar to Syntaxin-4;Putative uncharacterized protein STX4;Syntaxin 4A (Placental), isoform CRA_c;cDNA FLJ57517, highly similar to Syntaxin-4;Syntaxin 4A (Placental), isoform CRA_a	STX4;STX4A;hCG_21149	Syntaxin-4;Syntaxin 4A (Placental), isoform CRA_c;Syntaxin 4A (Placental), isoform CRA_a	Q12846;A8MXY0;B7Z425	3	1	1	1	0	1	0	0	0	1	0	0	0	1	0	0	7.4	7.4	7.4	34.18	297		1			0.0026385	18466	0	18466	0	0	0	24145	0	0	1
264	574;1190			IPI00029739;IPI00011264;IPI00883722	IPI00029739;IPI00011264;IPI00883722	IPI00029739	2;1;1	2;1;1	2;1;1	Complement factor H;H factor 1;cDNA FLJ75416, highly similar to Homo sapiens complement factor H (CFH), mRNA;HF protein;Complement factor H-related protein 1;H factor-like protein 1;H36;Complement factor H-related 1;FHR-1; complement Factor H-related protein 1	CFH;HF;HF1;HF2;CFHL;CFHL1;CFHL1P;CFHR1;CFHR1P;FHR1;HFL1;HFL2;RP1-15D12.2-002;H 36-2	Isoform 1 of Complement factor H;Complement factor H-related protein 1;Complement factor H-related 1	P08603-1;P08603;A8K5T0;Q14006;Q03591;B1AKG0;Q6LBM9	3	2	2	2	2	2	2	2	2	2	2	2	2	2	2	2	1.6	1.6	1.6	139.09	1231	2	2	2	2	3.05e-26	2568900	613200	707750	158440	1089500	373760	1062400	86685	2045000	4
265	308;431;900;1132;1583;2039;3092			IPI00029863;IPI00879231;IPI00879608;IPI00877925;IPI00879937;CON__P28800	IPI00029863;IPI00879231;IPI00879608;IPI00877925	IPI00029863	7;7;6;5;3;2	7;7;6;5;3;2	7;7;6;5;3;2	Alpha-2-antiplasmin;Alpha-2-plasmin inhibitor;Serpin F2;cDNA FLJ50942, highly similar to Alpha-2-antiplasmin;Putative uncharacterized protein SERPINF2	PLI;SERPINF2;AAP	55 kDa protein;Alpha-2-antiplasmin;alpha-2-antiplasmin isoform b precursor;Putative uncharacterized protein SERPINF2	P08697;B4E1B7;C9JY78;C9JPV4	6	7	7	7	7	7	6	7	7	7	6	7	7	7	6	7	22	22	22	55.064	495	7	7	6	7	8.74e-20	4789900	1715600	1216900	373520	1483900	2399300	1381100	338070	2294300	4
268	2056			IPI00030911;IPI00917990	IPI00030911;IPI00917990	IPI00030911	1;1	1;1	1;1	Endobrevin;Vesicle-associated membrane protein 8;Putative uncharacterized protein VAMP8	VAMP8	Vesicle-associated membrane protein 8;Putative uncharacterized protein VAMP8	Q9BV40;B8ZZT4	2	1	1	1	1	0	0	0	1	0	0	0	1	0	0	0	10	10	10	11.438	100	1				0.017686	67979	67979	0	0	0	82229	0	0	0	1
269	717;842;1421;2519;2980			IPI00031461;IPI00940148;IPI00640006;IPI00645255;IPI00010154;IPI00910113;IPI00514395;IPI00513929	IPI00031461;IPI00940148;IPI00640006;IPI00645255;IPI00010154;IPI00910113;IPI00514395	IPI00031461	5;5;4;4;3;3;3;1	5;5;4;4;3;3;3;1	5;5;4;4;3;3;3;1	cDNA FLJ60299, highly similar to Rab GDP dissociation inhibitor beta;GDP dissociation inhibitor 2;Guanosine diphosphate dissociation inhibitor 2;Rab GDP dissociation inhibitor beta;cDNA, FLJ92845, Homo sapiens GDP dissociation inhibitor 2 (GDI2), mRNA;GDI2 protein;GDP dissociation inhibitor 2 isoform 1;GDP dissociation inhibitor 2, isoform CRA_b;cDNA FLJ16452 fis, clone BRAWH3002467, highly simil…	GDI2;RP11-318E3.2-007;RABGDIB;hCG_24071;RP11-318E3.2-001;RP11-318E3.2-002;RP11-318E3.2-005;GDI1;GDIL;OPHN2;RABGDIA;XAP4;RP11-318E3.2-003	cDNA FLJ60299, highly similar to Rab GDP dissociation inhibitor beta;Rab GDP dissociation inhibitor beta;GDP dissociation inhibitor 2 isoform 2;GDP dissociation inhibitor 2;Rab GDP dissociation inhibitor alpha;cDNA FLJ52902, highly similar to Rab GDP disso	B4DLV7;Q5SX90;P50395;Q6IAT1;B3KVE3;Q5SX88;Q8TB95;Q5SX87;P31150;B4DH24;B4E070;B4DHX4;Q5SX91	8	5	5	5	4	5	5	5	4	5	5	5	4	5	5	5	15.4	15.4	15.4	51.153	449	5	6	6	6	2.92e-81	2608000	306550	317920	1358100	625390	336270	300080	1545600	962800	4
270	16;380;597;910;1277;1975			IPI00031522;IPI00908351	IPI00031522	IPI00031522	6;1	6;1	6;1	78 kDa gastrin-binding protein;Long chain 3-hydroxyacyl-CoA dehydrogenase;Long-chain enoyl-CoA hydratase;TP-alpha;Trifunctional enzyme subunit alpha, mitochondrial;cDNA FLJ53969, highly similar to Trifunctional enzyme subunit alpha, mitochondrial;cDNA FLJ54509, highly similar to Trifunctional enzyme subunit alpha, mitochondrial;Putative uncharacterized protein HADHA;Trifunctional protein alpha-su…	HADH;HADHA	Trifunctional enzyme subunit alpha, mitochondrial	P40939;B4DDZ5;B4DRH6;Q53T69;Q53TA2;Q9UQC5	2	6	6	6	5	6	3	5	5	6	3	5	5	6	3	5	10.9	10.9	10.9	82.999	763	6	7	3	6	5.83e-56	2228000	880080	793120	340390	214380	1170400	980250	371620	262580	4
271	506			IPI00031697;IPI00908304	IPI00031697;IPI00908304	IPI00031697	1;1	1;1	1;1	Mitsugumin-23;Transmembrane protein 109;cDNA, FLJ94551;cDNA FLJ57860, highly similar to Transmembrane protein 109	TMEM109	Transmembrane protein 109;cDNA FLJ57860, highly similar to Transmembrane protein 109	Q9BVC6;B2R9T9;B4E1S3	2	1	1	1	1	1	1	1	1	1	1	1	1	1	1	1	4.9	4.9	4.9	26.21	243	1	1	1	1	2.79e-09	847270	410310	136610	208970	91377	745660	95174	111350	77861	4
275	152;677;712;805;1726;2002;2754			IPI00032179;IPI00844156;CON__P41361	IPI00032179;IPI00844156	IPI00032179	7;5;2	7;5;2	7;5;2	Antithrombin-III;Serpin C1;Gene for antithrombin-III (aa 262-353);Antithrombin;Antithrombin III;SERPINC1 protein;Antithrombin III gene 3' (aa 375-432)	AT3;PRO0309;SERPINC1	Antithrombin-III;SERPINC1 protein	P01008;Q9UE54;Q7KYQ5;Q7KYY4;Q8IZZ8;Q8IZZ9;Q8J000;Q8J001;Q8TCE1;Q9UBW9	3	7	7	7	7	6	5	7	7	6	5	7	7	6	5	7	18.1	18.1	18.1	52.602	464	8	7	6	8	7.7e-24	8141100	1636800	1645800	757240	4101300	1534400	1920600	639570	7353100	4
276	18;2941;3267			IPI00032220;IPI00908365	IPI00032220	IPI00032220	3;1	3;1	3;1	Angiotensin I;Angiotensin II;Angiotensin III;Angiotensin-1;Angiotensin-2;Angiotensin-3;Angiotensinogen;Des-Asp[1]-angiotensin II;Serpin A8;Angiotensinogen (Serpin peptidase inhibitor, clade A, member 8);Angiotensinogen (Serpin peptidase inhibitor, clade A, member 8), isoform CRA_a;cDNA, FLJ92595, highly similar to Homo sapiens angiotensinogen (serine (or cysteine) proteinaseinhibitor, clade A (al…	AGT;SERPINA8;hCG_14741;RP11-505D24.1-001	Angiotensinogen	P01019;A7L3A3;A7L3A4;A7L3A5;B0ZBE2;B2R5S1;B4E1B3;Q53GY3;Q53YY1;Q59EP2;Q86U78	2	3	3	3	3	3	3	3	3	3	3	3	3	3	3	3	11.3	11.3	11.3	53.154	485	3	3	3	3	2.91e-25	1052800	164860	189200	116480	582250	174950	185590	65200	1068700	4
278	1972;2010;3163			IPI00032291;IPI00816741	IPI00032291	IPI00032291	3;1	3;1	3;1	C3 and PZP-like alpha-2-macroglobulin domain-containing protein 4;C5a anaphylatoxin;Complement C5;Complement C5 alpha chain;Complement C5 alpha' chain;Complement C5 beta chain	C5;CPAMD4	Complement C5	P01031	2	3	3	3	2	3	3	2	2	3	3	2	2	3	3	2	2.9	2.9	2.9	188.3	1676	2	3	3	2	2.11e-15	1573400	117680	694050	513100	248580	347980	551640	312900	747950	4
280	316;1490;2781;3156			IPI00032328;IPI00215894;IPI00924859;IPI00789376;IPI00797833;IPI00797097	IPI00032328;IPI00215894;IPI00924859;IPI00789376;IPI00797833;IPI00797097	IPI00032328	4;4;4;2;2;2	4;4;4;2;2;2	4;4;4;2;2;2	Alpha-2-thiol proteinase inhibitor;Bradykinin;Fitzgerald factor;High molecular weight kininogen;Ile-Ser-Bradykinin;Kallidin I;Kallidin II;Kininogen-1;Kininogen-1 heavy chain;Kininogen-1 light chain;Low molecular weight growth-promoting factor;Lysyl-bradykinin;T-kinin;Williams-Fitzgerald-Flaujeac factor;cDNA FLJ56836, highly similar to Kininogen-1;Kininogen 1, isoform CRA_b;cDNA FLJ53075, highly s…	BDK;KNG;KNG1;hCG_2021397	Isoform HMW of Kininogen-1;Isoform LMW of Kininogen-1;kininogen 1 isoform 3;KNG1 protein;21 kDa protein;17 kDa protein	P01042-1;P01042;B4E1C2;P01042-2;B4DPP8;C9JEX1;Q05CF8	6	4	4	4	4	3	4	4	4	3	4	4	4	3	4	4	6.7	6.7	6.7	71.957	644	4	3	4	4	7.55e-12	4878700	1113900	1041600	530570	2192600	1168600	1539100	381700	3656900	4
119	94			IPI00055606;IPI00930706;IPI00014398;IPI00647207;IPI00922730;IPI00643324;IPI00922769;IPI00029028;IPI00644118;IPI00641404;IPI00645286;IPI00644668;IPI00639828	IPI00055606;IPI00930706;IPI00014398;IPI00647207;IPI00922730;IPI00643324;IPI00922769;IPI00029028;IPI00644118;IPI00641404;IPI00645286;IPI00644668;IPI00639828	IPI00055606	1;1;1;1;1;1;1;1;1;1;1;1;1	1;1;1;1;1;1;1;1;1;1;1;1;1	1;1;1;1;1;1;1;1;1;1;1;1;1	Four and a half LIM domains protein 1;Skeletal muscle LIM-protein 1;cDNA FLJ55259, highly similar to Four and a half LIM domains protein 1;cDNA FLJ55242, highly similar to Four and a half LIM domains protein 1;Four and a half LIM domains 1, isoform CRA_c;Four and a half LIM domains 1 variant;cDNA FLJ53665, highly similar to Four and a half LIM domains protein 1;cDNA FLJ16189 fis, clone BRTHA20127…	FHL1;SLIM1;hCG_33097;RP11-535K18.1-007;RP11-535K18.1-003;RP11-535K18.1-008;RP11-535K18.1-012;RP11-535K18.1-006;RP11-535K18.1-011;RP11-535K18.1-013	Isoform 2 of Four and a half LIM domains protein 1;four and a half LIM domains 1 isoform 3;four and a half LIM domains 1 isoform 5;Isoform 1 of Four and a half LIM domains protein 1;cDNA FLJ53647, highly similar to Four and a half LIM domains protein 1;Fou	Q13642-2;Q13642;B7Z793;B7Z5T4;Q53FI7;Q13642-1;B7Z6U8;Q6IB30;B7Z5T3;B7Z5V0;Q5JXI8;B7Z4B7;Q5JXI2;Q5JXI3;Q5JXH7;Q5JXH8;Q13642-3;Q5JXH9;Q5JXI0	13	1	1	1	1	1	1	1	1	1	1	1	1	1	1	1	3.7	3.7	3.7	36.263	323	1	1	1	1	0.0016066	699420	88590	73934	399160	137730	97456	87917	363010	274860	4
284	375;2420			IPI00060201;IPI00639966	IPI00060201;IPI00639966	IPI00060201	2;2	2;2	2;2	Exophilin-2;Granuphilin;Synaptotagmin-like protein 4;cDNA FLJ77998, highly similar to Homo sapiens synaptotagmin-like 4 (granuphilin-a), mRNA;cDNA, FLJ93569, highly similar to Homo sapiens synaptotagmin-like 4 (granuphilin-a) (SYTL4), mRNA;cDNA FLJ40960 fis, clone UTERU2011806, highly similar to Synaptotagmin-like protein 4;Endocrine transmitter regulatory protein	SYTL4	Endocrine transmitter regulatory protein;Isoform 2 of Synaptotagmin-like protein 4	Q96C24-1;Q96C24;A8K973;B2R7R4;B3KUZ4;Q71SF7;Q96C24-2	2	2	2	2	2	2	1	2	2	2	1	2	2	2	1	2	3.4	3.4	3.4	76.251	673	2	2	1	2	1.1e-09	1370400	536660	569180	103110	161490	624190	748250	206300	176020	4
285	2923			IPI00072534;IPI00735181	IPI00072534;IPI00735181	IPI00072534	1;1	1;1	1;1	GCUNC-45;Protein unc-45 homolog A;Smooth muscle cell-associated protein 1;cDNA FLJ43733 fis, clone TESTI1000545, highly similar to Homo sapiens unc-45 homolog A (UNC45A), transcript variant 3, mRNA;cDNA FLJ77677;Unc-45 homolog A (C. elegans), isoform CRA_a	SMAP1;UNC45A;hCG_32584	Isoform 1 of Protein unc-45 homolog A;Isoform 2 of Protein unc-45 homolog A	Q9H3U1-1;Q9H3U1;Q9H3U1-2;A8K6F7	2	1	1	1	0	1	0	0	0	1	0	0	0	1	0	0	2.1	2.1	2.1	103.08	944		1			0.041002	11973	0	11973	0	0	0	15656	0	0	1
288	1266			IPI00103530;IPI00373946;IPI00479177	IPI00103530;IPI00373946;IPI00479177	IPI00103530	1;1;1	1;1;1	1;1;1	Atlastin-1;Brain-specific GTP-binding protein;GTP-binding protein 3;Guanine nucleotide-binding protein 3;Spastic paraplegia 3 protein A;Atlastin variant;SPG3A protein;Putative uncharacterized protein DKFZp686J1364	ATL1;GBP3;SPG3A;DKFZp686J1364	Atlastin-1;64 kDa protein;atlastin GTPase 1 isoform b	Q8WXF7;Q53F53;Q6IAK1;Q69YH7	3	1	1	1	1	1	1	1	1	1	1	1	1	1	1	1	2.7	2.7	2.7	63.543	558	2	2	2	2	0.00033278	175460	69764	46932	33893	24870	100540	65744	24449	28689	4
60	2269;2992			IPI00107753;IPI00107752;IPI00107751;IPI00107750;IPI00107749;IPI00006721;IPI00375150;IPI00375149;IPI00852888;IPI00797011	IPI00107753;IPI00107752;IPI00107751;IPI00107750;IPI00107749;IPI00006721;IPI00375150;IPI00375149;IPI00852888;IPI00797011	IPI00107753	2;2;2;2;2;2;2;2;1;1	2;2;2;2;2;2;2;2;1;1	2;2;2;2;2;2;2;2;1;1	Dynamin-like 120 kDa protein, form S1;Dynamin-like 120 kDa protein, mitochondrial;Optic atrophy protein 1;OPA1 protein	KIAA0567;OPA1	optic atrophy 1 isoform 8;Isoform 2 of Dynamin-like 120 kDa protein, mitochondrial;optic atrophy 1 isoform 6;optic atrophy 1 isoform 5;optic atrophy 1 isoform 4;Isoform 1 of Dynamin-like 120 kDa protein, mitochondrial;optic atrophy 1 isoform 3;optic atroph	O60313-2;O60313;O60313-1;Q6PEK6;C9J4J1	10	2	2	2	2	2	2	2	2	2	2	2	2	2	2	2	2.5	2.5	2.5	117.74	1015	2	2	2	2	0.0072869	4011700	644890	525630	1813000	1028200	641830	525580	2003700	1753500	4
291	2003			IPI00152850;IPI00902570	IPI00152850;IPI00902570	IPI00152850	1;1	1;1	1;1	JAM-2;Junctional adhesion molecule 3;Junctional adhesion molecule C;cDNA FLJ43081 fis, clone BRTHA3017589, highly similar to Junctional adhesion molecule C;Junctional adhesion molecule 3, isoform CRA_d	JAM3;UNQ859/PRO1868;hCG_37606	junctional adhesion molecule 3 precursor;cDNA FLJ43081 fis, clone BRTHA3017589, highly similar to Junctional adhesion molecule C	Q9BX67;B3KWG9	2	1	1	1	1	1	1	1	1	1	1	1	1	1	1	1	2.8	2.8	2.8	39.602	355	1	1	1	1	0.022185	447080	179460	136390	91284	39948	320660	122950	62932	44041	4
293	817;1811;2156;3253;3269			IPI00154742;IPI00788824;IPI00744476;IPI00658130;IPI00827875;IPI00784935;IPI00944677	IPI00154742;IPI00788824;IPI00744476;IPI00658130;IPI00827875;IPI00784935;IPI00944677	IPI00154742	5;3;3;3;3;3;3	2;2;2;2;2;2;2	0;0;0;0;0;0;0	Ig lambda-1 chain C regions;IGL@ protein;Putative uncharacterized protein DKFZp667J0810;Light chain Fab;Cyclosporin A transporter 1;V1-16 protein;V1-2 protein;V1-3 protein;V1-19 protein;Lambda-chain (AA -20 to 215);Precursor (AA -19 to 108)	IGLC1;IGL@;DKFZp667J0810;CyAT1;IGLV1-44;V1-16;V1-2;IGLV2-11;V1-3;V1-19	IGL@ protein;hypothetical protein XP_002348153;IGL@ protein;IGL@ protein;Lambda-chain;IGL@ protein;IGL@ protein	P01842;Q6PJR7;Q8N355;Q8TCJ5;A2NYV5;C6KXN3;Q567P1;Q5NV81;A2MYD6;Q6IPQ0;Q6PIK1;Q5NV84;Q6PIQ7;A2MYD2;A2NUT2;A2NV54;Q6GMW3;Q8N5F4	7	5	2	0	5	5	5	5	2	2	2	2	0	0	0	0	34.2	11.5	0	24.792	234	5	5	5	5	1.07e-98	205300000	3984200	11843000	177650000	11826000	1599100	8282800	197350000	9636400	4
296	184;576;1152;1191			IPI00166729;IPI00924948;IPI00939278;IPI00816309;IPI00871622;IPI00924815	IPI00166729;IPI00924948;IPI00939278;IPI00816309	IPI00166729	4;3;3;2;1;1	4;3;3;2;1;1	4;3;3;2;1;1	Zinc-alpha-2-glycoprotein;Putative uncharacterized protein AZGP1;AZGP1 protein	AZGP1;ZAG;ZNGP1	alpha-2-glycoprotein 1, zinc precursor;Putative uncharacterized protein AZGP1;Putative uncharacterized protein AZGP1;AZGP1 protein (Fragment)	P25311;C9JEV0;C9JAB1;A0JLQ0	6	4	4	4	4	4	4	4	4	4	4	4	4	4	4	4	18.5	18.5	18.5	34.258	298	4	4	4	4	3.42e-12	2482300	451210	446700	307810	1276500	385980	400540	245500	2447100	4
63	2430			IPI00169267;IPI00007183;IPI00893779;IPI00917688;IPI00916674	IPI00169267;IPI00007183;IPI00893779;IPI00917688;IPI00916674	IPI00169267	1;1;1;1;1	1;1;1;1;1	1;1;1;1;1	ADP-ribosylation factor-like protein 6-interacting protein 2;Atlastin-2;cDNA FLJ53876, highly similar to Homo sapiens ADP-ribosylation factor-like 6 interacting protein 2 (ARL6IP2), mRNA;cDNA FLJ57300, highly similar to Homo sapiens ADP-ribosylation factor-like 6 interacting protein 2 (ARL6IP2), mRNA;cDNA FLJ51152, highly similar to Homo sapiens ADP-ribosylation factor-like 6 interacting protein …	ARL6IP2;ATL2	Isoform 1 of Atlastin-2;Isoform 2 of Atlastin-2;cDNA FLJ51152, highly similar to Homo sapiens ADP-ribosylation factor-like 6 interacting protein 2 (ARL6IP2), mRNA;Putative uncharacterized protein ATL2;Putative uncharacterized protein ATL2	Q8NHH9-1;Q8NHH9;Q8NHH9-2;B7Z1X2;B7Z2H0;B7Z7X8;B7Z8V5;C9J398;C9JC25	5	1	1	1	1	1	1	1	1	1	1	1	1	1	1	1	1.5	1.5	1.5	66.228	583	1	1	1	1	0.00054443	367220	169320	95602	63240	39061	235820	122080	49214	48410	4
300	80;117;130;1315;2235;2937			IPI00169383;IPI00916818;IPI00909158;IPI00910974	IPI00169383;IPI00916818;IPI00909158;IPI00910974	IPI00169383	6;6;4;4	6;6;4;4	6;6;4;4	Cell migration-inducing gene 10 protein;Phosphoglycerate kinase 1;Primer recognition protein 2;Phosphoglycerate kinase	MIG10;OK/SW-cl.110;PGK1;PGKA;hCG_20034	Phosphoglycerate kinase 1;Phosphoglycerate kinase;Phosphoglycerate kinase;Phosphoglycerate kinase	P00558;A8K4W6;B7Z7A9;B4DHM5;B4E1H9;B4DHB3;B4DWQ3	4	6	6	6	6	6	6	6	6	6	6	6	6	6	6	6	18.5	18.5	18.5	44.614	417	6	6	6	6	2.74e-23	4610400	530710	570330	2251100	1258200	330870	425080	2747000	2148000	4
302	3082			IPI00171573;IPI00185975	IPI00171573;IPI00185975	IPI00171573	1;1	1;1	1;1	Coiled-coil domain-containing protein 109A;cDNA, FLJ96585;cDNA FLJ46135 fis, clone TESTI2052110;Chromosome 10 open reading frame 42, isoform CRA_b;cDNA FLJ50716	C10orf42;CCDC109A;hCG_19271	Isoform 1 of Coiled-coil domain-containing protein 109A;Isoform 2 of Coiled-coil domain-containing protein 109A	Q8NE86-1;Q8NE86;B2RDF3;B3KXV7;Q8NE86-2;B4DWD0	2	1	1	1	0	1	1	1	0	1	1	1	0	1	1	1	4.6	4.6	4.6	39.866	351		1	1	1	0.000254	280690	0	117890	124060	38744	0	140350	143400	56413	3
298	1631			IPI00171692;IPI00171152;IPI00922889;IPI00927072;IPI00922400;IPI00170896;IPI00167072;IPI00925250;IPI00171691	IPI00171692;IPI00171152;IPI00922889;IPI00927072;IPI00922400;IPI00170896;IPI00167072;IPI00925250;IPI00171691	IPI00171692	1;1;1;1;1;1;1;1;1	1;1;1;1;1;1;1;1;1	1;1;1;1;1;1;1;1;1	Abhydrolase domain-containing protein 11;Williams-Beuren syndrome chromosomal region 21 protein;Putative uncharacterized protein ABHD11	ABHD11;PP1226;WBSCR21	Isoform 1 of Abhydrolase domain-containing protein 11;Isoform 4 of Abhydrolase domain-containing protein 11;abhydrolase domain containing 11 isoform 8;Putative uncharacterized protein ABHD11;abhydrolase domain containing 11 7;Putative uncharacterized prote	Q8NFV4-1;Q8NFV4;Q8NFV4-4;C9JHE2;C9JXD4;Q8NFV4-3;C9J7Q4;Q8NFV4-5;C9J3B8;Q8NFV4-2	9	1	1	1	1	1	1	1	1	1	1	1	1	1	1	1	6.7	6.7	6.7	34.69	315	1	1	1	1	0.042644	169580	33619	51344	68271	16349	39328	76734	62298	23857	4
304	2534			IPI00178926;IPI00947235	IPI00178926;IPI00947235	IPI00178926	1;1	1;1	1;1	Immunoglobulin J chain;Putative uncharacterized protein IGJ	IGCJ;IGJ	Immunoglobulin J chain;Putative uncharacterized protein IGJ	P01591;C9JA05	2	1	1	1	1	1	1	1	1	1	1	1	1	1	1	1	7.5	7.5	7.5	18.098	159	1	1	1	1	2.3e-13	10240000	421600	1261400	8041500	515640	233480	1116700	9232100	443100	4
306	998			IPI00179589;IPI00924816;IPI00926178	IPI00179589;IPI00924816;IPI00926178	IPI00179589	1;1;1	1;1;1	1;1;1	Myotrophin;Protein V-1;cDNA FLJ31663 fis, clone NT2RI2004504, highly similar to MYOTROPHIN;Myotrophin, isoform CRA_a;Putative uncharacterized protein DKFZp761E1322;V-1 protein;Putative uncharacterized protein MTPN	MTPN;DKFZp761E1322;hCG_16971;tcag7.994	14 kDa protein;Myotrophin;Putative uncharacterized protein MTPN	P58546;Q69YG1;C9JL85	3	1	1	1	1	1	1	1	1	1	1	1	1	1	1	1	13.1	13.1	13.1	14.345	130	1	1	1	1	0.00015729	663050	94214	105930	275010	187890	87292	106090	210650	423920	4
307	2399			IPI00180240;IPI00220828;IPI00376164;IPI00376165	IPI00180240;IPI00220828;IPI00376164;IPI00376165	IPI00180240	1;1;1;1	1;1;1;1	1;1;1;1	Thymosin beta-4-like protein 3;Fx;Hematopoietic system regulatory peptide;Seraspenide;Thymosin beta-4;cDNA, FLJ92006, Homo sapiens thymosin, beta 4, X chromosome (TMSB4X), mRNA;Thymosin beta 4, X-linked;Thymosin, beta 4, X-linked, isoform CRA_a;Putative thymosin beta-4-like protein 2;HCG1780554;Thymosin-like 4 (Pseudogene)	TMSL3;TB4X;THYB4;TMSB4;TMSB4X;hCG_1646598;TMSL2;hCG_1780554;RP11-339B21.6-001;TMSL4	Thymosin beta-4-like protein 3;Thymosin beta-4;Putative thymosin beta-4-like protein 2;HCG1780554	A8MW06;P62328;A2VCK8;Q2KHM7;Q5T4B6	4	1	1	1	1	1	1	1	1	1	1	1	1	1	1	1	25	25	25	5.0626	44	1	1	1	1	0.0010746	5126900	568260	399600	2468500	1690500	476210	330360	2618900	2956400	4
308	2111			IPI00180404;IPI00514299;IPI00855737;IPI00873443	IPI00180404;IPI00514299;IPI00855737;IPI00873443	IPI00180404	1;1;1;1	1;1;1;1	1;1;1;1	F-actin-binding protein;Nelin;Nexilin;cDNA FLJ55951, highly similar to Homo sapiens nexilin (F actin binding protein) (NEXN), mRNA;cDNA FLJ56379, highly similar to Mus musculus nexilin (Nexn), mRNA	NEXN	Isoform 1 of Nexilin;Isoform 2 of Nexilin;Isoform 3 of Nexilin;cDNA FLJ56379, highly similar to Mus musculus nexilin (Nexn), mRNA	Q0ZGT2-1;Q0ZGT2;Q0ZGT2-2;Q0ZGT2-3;B4DDI0;B4DPZ7;B5ME05	4	1	1	1	1	1	1	1	1	1	1	1	1	1	1	1	1.6	1.6	1.6	80.657	675	1	1	1	1	0.0011888	268570	91868	81019	57195	38489	145400	89778	48471	52162	4
311	541;1276;2954;2998;3020;3027;3123			IPI00186903;IPI00514475;IPI00914948;IPI00877765;IPI00878633;IPI00878099;IPI00877915;IPI00940501	IPI00186903;IPI00514475;IPI00914948	IPI00186903	7;7;7;2;1;1;1;1	7;7;7;2;1;1;1;1	7;7;7;2;1;1;1;1	Apolipoprotein L;Apolipoprotein L1;Apolipoprotein L-I;APOL1 protein;cDNA, FLJ94353, highly similar to Homo sapiens apolipoprotein L, 1 (APOL1), transcript variant 2, mRNA;Apolipoprotein L, 1;cDNA FLJ60316, highly similar to Apolipoprotein-L1;cDNA FLJ54060, highly similar to Apolipoprotein-L1;cDNA FLJ53694, highly similar to Apolipoprotein-L1	APOL;APOL1	Isoform 2 of Apolipoprotein L1;Isoform 1 of Apolipoprotein L1;apolipoprotein L1 isoform c precursor	O14791-2;O14791;A5PL32;B2R9E5;Q1WWL5;Q29RW7;O14791-1;Q2KHQ6;B4DNT5;B4DU12;B4E1N5	8	7	7	7	7	7	6	7	7	7	6	7	7	7	6	7	27.3	27.3	27.3	45.918	414	8	8	7	8	4.09e-72	6591700	1869700	1155500	2023800	1542700	2383100	1405300	2555000	1919900	4
312	1275;1571;1931			IPI00215914;IPI00215917;IPI00909515;IPI00215919;IPI00215918;IPI00930263;IPI00910783;IPI00853337;IPI00797941;IPI00792330;IPI00930413;IPI00789027;IPI00947463;IPI00944969	IPI00215914;IPI00215917;IPI00909515;IPI00215919;IPI00215918;IPI00930263;IPI00910783;IPI00853337;IPI00797941;IPI00792330	IPI00215914	3;3;2;2;2;2;2;2;2;2;1;1;1;1	3;3;2;2;2;2;2;2;2;2;1;1;1;1	3;3;2;2;2;2;2;2;2;2;1;1;1;1	ADP-ribosylation factor 1;ADP-ribosylation factor 3;cDNA FLJ51495, highly similar to ADP-ribosylation factor 5;ADP-ribosylation factor 5;ADP-ribosylation factor 5, isoform CRA_a;cDNA, FLJ92389, Homo sapiens ADP-ribosylation factor 5 (ARF5), mRNA;ADP-ribosylation factor 4;cDNA FLJ61099, highly similar to ADP-ribosylation factor 1;cDNA FLJ51215, highly similar to ADP-ribosylation factor 1;Putative …	ARF1;ARF3;ARF5;hCG_32325;tcag7.6;ARF2;ARF4	ADP-ribosylation factor 1;ADP-ribosylation factor 3;cDNA FLJ51495, highly similar to ADP-ribosylation factor 5;ADP-ribosylation factor 5;ADP-ribosylation factor 4;cDNA FLJ61099, highly similar to ADP-ribosylation factor 1;cDNA FLJ51215, highly similar to A	P84077;P61204;B4DLJ3;P84085;A4D0Z3;P18085;B4DEB9;B4DJC8;C9J1Z8;B4E190;B7ZB63;C9JPM4	14	3	3	3	3	3	3	2	3	3	3	2	3	3	3	2	27.6	27.6	27.6	20.697	181	3	3	3	2	6.04e-30	3236100	706380	698250	1404200	427230	828450	895440	1132000	998990	4
313	463;679;1413			IPI00215997;IPI00657796;IPI00795937;IPI00908644;IPI00556460	IPI00215997;IPI00657796;IPI00795937	IPI00215997	3;3;3;1;1	3;3;3;1;1	3;3;3;1;1	5H9 antigen;CD9 antigen;Cell growth-inhibiting gene 2 protein;Leukocyte antigen MIC3;Motility-related protein;p24;Tetraspanin-29;Putative uncharacterized protein CD9;cDNA FLJ51032, highly similar to CD9 antigen	CD9;GIG2;MIC3;TSPAN29	CD9 antigen;Putative uncharacterized protein CD9;15 kDa protein	P21926;A6NNI4;B4DPP0	5	3	3	3	3	3	3	3	3	3	3	3	3	3	3	3	7.5	7.5	7.5	25.416	228	3	3	3	3	8.04e-09	10057000	4405900	2977700	1760000	913440	6034000	4006900	1352700	1050100	4
314	1394			IPI00216008;IPI00853547;IPI00289800;IPI00884082;IPI00645745;IPI00642620	IPI00216008;IPI00853547;IPI00289800;IPI00884082;IPI00645745;IPI00642620	IPI00216008	1;1;1;1;1;1	1;1;1;1;1;1	1;1;1;1;1;1	Glucose-6-phosphate 1-dehydrogenase;Glucose-6-phosphate dehydrogenase;Glucose-6-phosphate dehydrogenase variant	G6PD	Isoform Long of Glucose-6-phosphate 1-dehydrogenase;Isoform 3 of Glucose-6-phosphate 1-dehydrogenase;Isoform Short of Glucose-6-phosphate 1-dehydrogenase;Glucose-6-phosphate 1-dehydrogenase;37 kDa protein;Glucose-6-phosphate dehydrogenase	P11413-2;P11413;P11413-3;A8K8D9;P11413-1;Q0PHS4;Q2Q9B7;Q2Q9H2;Q2VF42;B4DYA7;Q0PHS1;A2IBT6;A7IZZ3;B6ZHS6;Q0PHS2;Q0PHS3;Q0PHS5;Q0PHS6	6	1	1	1	0	1	1	1	0	1	1	1	0	1	1	1	1.8	1.8	1.8	63.826	561		1	1	1	0.038276	126030	0	20325	76629	29075	0	16568	104150	28987	3
316	29;68;524;531;1103;1316;1317;1739;1831;1832;2334;2335;2454;2494			IPI00216134;IPI00921977;IPI00384369;IPI00745267	IPI00216134;IPI00921977;IPI00384369;IPI00745267	IPI00216134	14;13;12;12	10;9;8;8	3;3;3;1	cDNA FLJ55130, highly similar to Rattus norvegicus tropomyosin 1, alpha (Tpm1), transcript variant 8, mRNA;Alpha-tropomyosin;cDNA FLJ54760, highly similar to Rattus norvegicus tropomyosin 1, alpha (Tpm1), transcript variant 7, mRNA;Tropomyosin 1 (Alpha), isoform CRA_i;Tropomyosin alpha-1 chain;Tropomyosin-1;Tropomyosin;Tropomyosin 1 alpha variant 6;TPM1 protein variant	hCG_33495;TPM1;C15orf13;TMSA	tropomyosin 1 alpha chain isoform 7;Tropomyosin 1 (Alpha), isoform CRA_i;Tropomyosin 1 alpha variant 6;Isoform 2 of Tropomyosin alpha-1 chain	B7Z596;O15513;B7Z722;P09493-5;P09493;Q07413;Q1ZYL5;Q59GR8;P09493-2	4	14	10	3	14	14	12	13	10	10	8	9	3	3	3	3	50.8	44.8	14.5	28.747	248	11	11	9	11	2.74e-77	24539000	9467400	6676800	4744600	3650300	13715000	9625900	2749700	4673900	4
317	868;3076			IPI00216293;IPI00910977;IPI00746782;IPI00943076;IPI00165360;IPI00942726;IPI00878140;IPI00877618	IPI00216293;IPI00910977;IPI00746782;IPI00943076;IPI00165360;IPI00942726;IPI00878140;IPI00877618	IPI00216293	2;1;1;1;1;1;1;1	2;1;1;1;1;1;1;1	2;1;1;1;1;1;1;1	Rhodanese;Thiosulfate sulfurtransferase;Thiosulfate sulfurtransferase variant;cDNA FLJ31171 fis, clone KIDNE2000046, highly similar to 3-mercaptopyruvate sulfurtransferase;3-mercaptopyruvate sulfurtransferase variant;3-mercaptopyruvate sulfurtransferase;Mercaptopyruvate sulfurtransferase, isoform CRA_a;MPST protein;Putative uncharacterized protein MPST;Thiosulfate sulfurtransferase (Rhodanese);cD…	TST;MPST;TST2;hCG_41447;LL22NC01-146D10.3-003;LL22NC01-146D10.4-005	Thiosulfate sulfurtransferase;mercaptopyruvate sulfurtransferase isoform 1;3-mercaptopyruvate sulfurtransferase variant (Fragment);33 kDa protein;3-mercaptopyruvate sulfurtransferase;27 kDa protein;cDNA FLJ57870, highly similar to Thiosulfate sulfurtransfe	Q16762;Q53EW8;B3KP52;Q59HD5;P25325;Q6FHN9;B1AH48;B4DVZ4;B1AH49;Q2VEU0;Q2VEU1	8	2	2	2	2	2	2	2	2	2	2	2	2	2	2	2	8.1	8.1	8.1	33.429	297	2	2	2	2	1.36e-14	735250	292530	204490	154250	83983	428200	291610	112560	77401	4
319	1081;1448;1800;3117			IPI00216308;IPI00847300;IPI00790304;IPI00910830	IPI00216308;IPI00847300;IPI00790304;IPI00910830	IPI00216308	4;2;2;2	4;2;2;2	4;2;2;2	Outer mitochondrial membrane protein porin 1;Plasmalemmal porin;Porin 31HL;Porin 31HM;Voltage-dependent anion-selective channel protein 1;cDNA FLJ38670 fis, clone HSYRA2000190, highly similar to Voltage-dependent anion-selective channel protein 1;Putative uncharacterized protein VDAC1;cDNA FLJ57715, highly similar to Voltage-dependent anion-selective channel protein 1	VDAC;VDAC1	Voltage-dependent anion-selective channel protein 1;Similar to Voltage-dependent anion-selective channel protein 1;Putative uncharacterized protein VDAC1;cDNA FLJ57715, highly similar to Voltage-dependent anion-selective channel protein 1	P21796;B3KTS5;C9JI87;B4DEI3	4	4	4	4	4	4	4	4	4	4	4	4	4	4	4	4	16.6	16.6	16.6	30.772	283	5	5	5	5	5.91e-14	8047500	3482800	2655600	1243200	665940	4552000	3844500	914910	681910	4
320	251;444;2050;2599;3138;3194;3200			IPI00216318;IPI00759832;IPI00640721;IPI00645801	IPI00216318;IPI00759832	IPI00216318	7;7;3;3	4;4;1;1	4;4;1;1	14-3-3 protein beta/alpha;14-3-3 protein beta/alpha, N-terminally processed;Protein 1054;Protein kinase C inhibitor protein 1	YWHAB	Isoform Long of 14-3-3 protein beta/alpha;Isoform Short of 14-3-3 protein beta/alpha	P31946-1;P31946;B5BU24;P31946-2	4	7	4	4	6	6	6	6	3	3	3	3	3	3	3	3	33.7	22.8	22.8	28.082	246	5	5	4	5	1.73e-66	5392000	1614300	1265700	1385100	1126900	1874000	1411500	1617100	1892300	4
321	249;444;494;875;1463;2050;2103;2189			IPI00216319;IPI00794254;IPI00827595;IPI00879350	IPI00216319;IPI00794254	IPI00216319	8;6;1;1	6;4;1;1	6;4;1;1	14-3-3 protein eta;Protein AS1;cDNA, FLJ93036, highly similar to Homo sapiens tyrosine 3-monooxygenase/tryptophan 5-monooxygenaseactivation protein, eta polypeptide (YWHAH), mRNA;Tyrosine 3-monooxygenase/tryptophan 5-monooxygenase activation protein, eta polypeptide;Homo sapiens clone CDABP0046 mRNA sequence	YWHA1;YWHAH;LL22NC03-44A4.1-004	14-3-3 protein eta;Homo sapiens clone CDABP0046 mRNA sequence	Q04917;B2R6N6;A2IDB2;Q9H4N8	4	8	6	6	8	8	7	8	6	6	5	6	6	6	5	6	32.5	25.2	25.2	28.218	246	8	8	7	8	1.77e-112	9840500	3507100	2774700	1808100	1750600	4768100	3379900	1968900	2360900	4
253	2753			IPI00216445;IPI00028159;IPI00911043	IPI00216445;IPI00028159;IPI00911043	IPI00216445	1;1;1	1;1;1	1;1;1	C-X-C chemokine receptor type 4;FB22;Fusin;HM89;LCR1;Leukocyte-derived seven transmembrane domain receptor;NPYRL;Stromal cell-derived factor 1 receptor;cDNA, FLJ92538, highly similar to Homo sapiens chemokine (C-X-C motif) receptor 4 (CXCR4), mRNA;Chemokine receptor CXCR4;Chemokine receptor 4;Seven transmembrane helix receptor;cDNA FLJ51543, highly similar to C-X-C chemokine receptor type 4	CXCR4	Isoform 2 of C-X-C chemokine receptor type 4;Isoform 1 of C-X-C chemokine receptor type 4;cDNA FLJ51543, highly similar to C-X-C chemokine receptor type 4	P61073-2;P61073;B2R5N0;Q9BXA0;P61073-1;Q53S69;Q5MIL4;Q8NH28;B4DKQ9	3	1	1	1	1	1	1	1	1	1	1	1	1	1	1	1	3.4	3.4	3.4	40.221	356	1	1	1	1	0.033855	105970	51990	26001	10831	17153	78354	34507	6308.7	15977	4
324	3			IPI00216626;IPI00885075	IPI00216626;IPI00885075	IPI00216626	1;1	1;1	1;1	Keratinocyte differentiation-associated protein	KDAP;KRTDAP;UNQ467/PRO826	Isoform 1 of Keratinocyte differentiation-associated protein;Isoform 2 of Keratinocyte differentiation-associated protein	P60985-1;P60985;P60985-2	2	1	1	1	1	1	1	1	1	1	1	1	1	1	1	1	15.2	15.2	15.2	11.05	99	1	1	1	1	0.00032005	423010	100760	107030	129560	85665	118590	142570	128640	138580	4
325	438;440;2536;2647;2719			IPI00216691;CON__P02584	IPI00216691	IPI00216691	5;2	5;2	5;2	Profilin I;Profilin-1;Profilin	PFN1;hCG_32691	Profilin-1	P07737;Q53Y44	2	5	5	5	5	5	5	5	5	5	5	5	5	5	5	5	45.7	45.7	45.7	15.054	140	6	6	6	6	2.19e-107	54076000	6064000	5785300	25770000	16456000	6205100	6580800	26769000	27432000	4
329	1465;1569			IPI00217143;IPI00305166;IPI00902754;IPI00789403;IPI00798202;IPI00940951;IPI00909676;IPI00887220	IPI00217143;IPI00305166;IPI00902754;IPI00789403;IPI00798202;IPI00940951;IPI00909676;IPI00887220	IPI00217143	2;1;1;1;1;1;1;1	2;1;1;1;1;1;1;1	2;1;1;1;1;1;1;1	SDHA protein;Flavoprotein subunit of complex II;Succinate dehydrogenase [ubiquinone] flavoprotein subunit, mitochondrial;cDNA FLJ37560 fis, clone BRCOC2000333, highly similar to Succinate dehydrogenase (ubiquinone) flavoprotein subunit, mitochondrial (EC 1.3.5.1);cDNA FLJ55072, highly similar to Succinate dehydrogenase (ubiquinone) flavoprotein subunit, mitochondrial (EC1.3.5.1);cDNA FLJ61478, hi…	SDH2;SDHA;SDHF	SDHA protein;cDNA FLJ61478, highly similar to Succinate dehydrogenase (ubiquinone) flavoprotein subunit, mitochondrial;cDNA FLJ16373 fis, clone THYMU3000269, highly similar to Succinate dehydrogenase (ubiquinone) flavoprotein subunit, mitochondrial;28 kDa	Q8IW48;P31040;B3KT34;B4DJ60;B4DYN5;Q0QF12;Q59GW8;B3KYA5;B4DNB2	8	2	2	2	2	2	1	2	2	2	1	2	2	2	1	2	4.2	4.2	4.2	56.751	520	2	2	1	2	4.55e-11	389920	171220	133340	52469	32884	235160	177040	42470	31848	4
330	891;1622;1672;1756;1758;2117;2309;2310;2395;2435;2480;3086			IPI00217563;IPI00217561;IPI00217562;IPI00549336;IPI00293305;IPI00945878;IPI00945037;IPI00947385;IPI00946209	IPI00217563;IPI00217561;IPI00217562;IPI00549336;IPI00293305	IPI00217563	12;10;10;10;10;4;2;2;2	12;10;10;10;10;4;2;2;2	12;10;10;10;10;4;2;2;2	Fibronectin receptor subunit beta;Integrin beta-1;VLA-4 subunit beta	FNRB;ITGB1;MDF2;MSK12	Isoform Beta-1A of Integrin beta-1;Isoform Beta-1C of Integrin beta-1;Isoform Beta-1C-2 of Integrin beta-1;Isoform Beta-1D of Integrin beta-1;Isoform Beta-1B of Integrin beta-1	P05556-1;P05556;P05556-3;P05556-4;P05556-5;P05556-2	9	12	12	12	12	12	11	10	12	12	11	10	12	12	11	10	18.9	18.9	18.9	88.414	798	13	13	12	11	4.57e-77	19163000	8681700	5528300	3248200	1704500	11635000	7348900	2503500	2216600	4
335	62;185;517;1104;1316;1317;1320;1321;1830;1907;1933;2334;2335			IPI00218319;IPI00479185;IPI00642042;IPI00382894;IPI00218320;IPI00477649;IPI00183968;IPI00909961;IPI00854592;IPI00643370;IPI00645055;IPI00647245;IPI00844078;IPI00900375;IPI00640264	IPI00218319;IPI00479185;IPI00642042;IPI00382894;IPI00218320;IPI00477649;IPI00183968;IPI00909961;IPI00854592	IPI00218319	13;13;13;12;12;12;8;8;8;5;4;4;3;3;2	7;7;7;6;6;6;2;6;6;3;2;2;3;3;1	7;7;7;6;6;6;2;6;6;3;2;2;3;3;1	Gamma-tropomyosin;Tropomyosin alpha-3 chain;Tropomyosin-3;Tropomyosin-5;cDNA, FLJ96568, highly similar to Homo sapiens tropomyosin 3 (TPM3), mRNA;Tropomyosin 3;Putative uncharacterized protein DKFZp686J1372;Tropomyosin 3, isoform CRA_b;TPMsk3;cDNA FLJ50612, highly similar to Rattus norvegicus tropomyosin 3, gamma (Tpm3), transcript variant 2, mRNA;Cytoskeletal tropomyosin isoform (2.5 kb);Cytoske…	TPM3;RP11-205M9.1-009;DKFZp686J1372;RP11-205M9.1-003;hCG_1997142;RP11-205M9.1-006;RP11-205M9.1-005;OK/SW-cl.5;RP11-205M9.1-010	Isoform 2 of Tropomyosin alpha-3 chain;tropomyosin 3 isoform 4;Putative uncharacterized protein DKFZp686J1372;Tropomyosin 3, isoform CRA_b;Isoform 3 of Tropomyosin alpha-3 chain;tropomyosin 3 isoform 5;tropomyosin 3 isoform 1;cDNA FLJ50720, highly similar	P06753-2;P06753;B2RDE1;Q5VU66;Q5HYB6;Q5VU59;Q5VU58;Q8TCG3;P06753-3;B4DQ80;Q5VU61;Q6LDX7;Q8NI98;Q5VU72;P06753-1;B4DWT5;Q8NAG3	15	13	7	7	13	13	12	13	7	7	7	7	7	7	7	7	44.8	29	29	29.032	248	8	8	8	8	5.08e-81	42218000	14383000	10859000	10109000	6867200	18618000	14284000	9757600	10028000	4
337	246;2278			IPI00218414;IPI00790885	IPI00218414;IPI00790885	IPI00218414	2;1	2;1	2;1	Carbonate dehydratase II;Carbonic anhydrase 2;Carbonic anhydrase C;Carbonic anhydrase II	CA2;carbonic anhydrase II/ CA II	Carbonic anhydrase 2;11 kDa protein	P00918;Q6LD99	2	2	2	2	2	2	2	2	2	2	2	2	2	2	2	2	10.8	10.8	10.8	29.246	260	2	2	2	2	5.16e-05	475120	69989	71198	209620	124320	63878	62306	227570	232420	4
39	183;352;537;1324;1365;1911;1947;1989;2062;2524;2525;2594;2830			IPI00218442;IPI00303760;IPI00004092;IPI00218440;IPI00748794;IPI00478023	IPI00218442;IPI00303760;IPI00004092;IPI00218440;IPI00748794;IPI00478023	IPI00218442	13;13;13;13;13;13	13;13;13;13;13;13	11;11;11;11;11;11	Calcium pump 3;Sarcoplasmic/endoplasmic reticulum calcium ATPase 3;Putative uncharacterized protein ATP2A3;cDNA FLJ77199, highly similar to Homo sapiens ATPase, Ca++ transporting, ubiquitous (ATP2A3), transcript variant 6, mRNA	ATP2A3	Putative uncharacterized protein ATP2A3;ATPase, Ca++ transporting, ubiquitous isoform e;Isoform SERCA3B of Sarcoplasmic/endoplasmic reticulum calcium ATPase 3;Isoform SERCA3C of Sarcoplasmic/endoplasmic reticulum calcium ATPase 3;Isoform SERCA3A of Sarcopl	Q93084-6;Q93084;A8MYK9;Q93084-5;Q93084-1;Q93084-3;Q93084-2;A8K9K1;Q93084-4;A8MZG0	6	13	13	11	13	13	12	13	13	13	12	13	11	11	11	11	16.1	16.1	14.4	114.87	1052	15	14	13	14	1.9e-187	31413000	13483000	9752200	5078100	3100000	18754000	13231000	3808900	3301700	4
340	723;1205;1270;1602;3244			IPI00218732;IPI00916980	IPI00218732	IPI00218732	5;1	5;1	5;1	Aromatic esterase 1;K-45;Serum aryldialkylphosphatase 1;Serum paraoxonase/arylesterase 1;cDNA FLJ57644, highly similar to Serum paraoxonase/arylesterase 1 (EC 3.1.1.2);Paraoxonase 1	PON;PON1	Serum paraoxonase/arylesterase 1	P27169;B4DX19;Q96P89;Q96P91	2	5	5	5	4	5	3	5	4	5	3	5	4	5	3	5	27	27	27	39.749	355	5	6	4	6	1.64e-59	4353300	1093400	1214200	319990	1725700	932060	1533500	354120	3170200	4
341	1154			IPI00218733;IPI00789078	IPI00218733;IPI00789078	IPI00218733	1;1	1;1	1;1	Superoxide dismutase [Cu-Zn]	SOD1	Superoxide dismutase [Cu-Zn];Superoxide dismutase	P00441;A8MST3	2	1	1	1	1	1	0	1	1	1	0	1	1	1	0	1	7.8	7.8	7.8	15.936	154	1	1		1	0.00093721	206410	44744	44774	0	116890	22110	23916	0	253570	3
224	2444;2554			IPI00218782;IPI00026185;IPI00642256;IPI00646047;IPI00647677	IPI00218782;IPI00026185;IPI00642256;IPI00646047;IPI00647677	IPI00218782	2;2;2;1;1	2;2;2;1;1	2;2;2;1;1	Capping protein (Actin filament) muscle Z-line, beta;Capping protein (Actin filament) muscle Z-line, beta, isoform CRA_d;cDNA, FLJ93598, highly similar to Homo sapiens capping protein (actin filament) muscle Z-line, beta (CAPZB), mRNA;cDNA FLJ60094, highly similar to F-actin capping protein subunit beta;CapZ beta;F-actin-capping protein subunit beta;Capping protein (Actin filament) muscle Z-line,…	CAPZB;hCG_41078;RP4-657E11.7-008;RP4-657E11.7-001;RP4-657E11.7-002;RP4-657E11.7-009	cDNA FLJ60094, highly similar to F-actin capping protein subunit beta;Isoform 1 of F-actin-capping protein subunit beta;Isoform 2 of F-actin-capping protein subunit beta;cDNA FLJ43095 fis, clone CORDB2000541, highly similar to F-actin capping protein subun	B1AK88;B2R7T8;B4DWA6;P47756-1;P47756;P47756-2;B1AK87;Q32Q68;Q7L4N0;B1AK85;B1AK86;B1AP83	5	2	2	2	2	1	2	2	2	1	2	2	2	1	2	2	7.2	7.2	7.2	37.482	335	3	1	2	2	6.61e-07	2976000	1059300	308690	968480	639500	1453100	631070	754040	837890	4
297	1032;1608;1702			IPI00219012;IPI00640091;IPI00639876;IPI00166845;IPI00013981;IPI00515097;IPI00394952;IPI00555672;IPI00940423;IPI00383291	IPI00219012;IPI00640091;IPI00639876;IPI00166845;IPI00013981	IPI00219012	3;3;3;3;2;1;1;1;1;1	1;1;1;1;0;0;0;0;0;0	1;1;1;1;0;0;0;0;0;0	p59-Fyn;Proto-oncogene c-Fyn;Proto-oncogene Syn;SLK;Tyrosine-protein kinase Fyn;cDNA FLJ32137 fis, clone PEBLM2000479, highly similar to Proto-oncogene tyrosine-protein kinase Fyn (EC 2.7.10.2);FYN oncogene related to SRC, FGR, YES;Putative uncharacterized protein FYN;p61-Yes;Proto-oncogene c-Yes;Proto-oncogene tyrosine-protein kinase Yes;cDNA, FLJ94729, highly similar to Homo sapiens v-yes-1 Yam…	FYN;RP1-66H14.1-003;YES;YES1	Isoform 1 of Proto-oncogene tyrosine-protein kinase Fyn;Isoform 2 of Proto-oncogene tyrosine-protein kinase Fyn;cDNA FLJ32137 fis, clone PEBLM2000479, highly similar to Proto-oncogene tyrosine-protein kinase Fyn;Isoform 3 of Proto-oncogene tyrosine-protein	P06241-1;P06241;B5BU57;P06241-2;B3KPS6;Q5R3A8;P06241-3;P07947;B2RA70	10	3	1	1	3	3	3	3	1	1	1	1	1	1	1	1	7.1	3.7	3.7	60.761	537	1	1	1	1	5.47e-11	58114	14727	9725.9	23053	10608	18499	11124	26087	14838	4
344	862;1617;1792;1837;1838;2375;2823;2878;2896;2897;3051;3052;3095	43	46	IPI00219018;IPI00789134;IPI00795257;IPI00788737;IPI00797221;IPI00794605;IPI00795622;CON__P10096;IPI00793922;IPI00022430;IPI00879148	IPI00219018;IPI00789134;IPI00795257;IPI00788737;IPI00797221;IPI00794605;IPI00795622	IPI00219018	13;11;11;10;9;9;7;6;2;1;1	13;11;11;10;9;9;7;6;2;1;1	13;11;11;10;9;9;7;6;2;1;1	Glyceraldehyde-3-phosphate dehydrogenase;Glyceraldehyde 3-phosphate dehydrogenase	CDABP0047;GAPD;GAPDH;OK/SW-cl.12	Glyceraldehyde-3-phosphate dehydrogenase;Glyceraldehyde 3-phosphate dehydrogenase;32 kDa protein;39 kDa protein;Glyceraldehyde 3-phosphate dehydrogenase;18 kDa protein;Glyceraldehyde 3-phosphate dehydrogenase	P04406;A4UCT1;Q16768;Q2TSD0;Q5ZEY3;Q0QET7;B4DRV9	11	13	13	13	13	13	13	12	13	13	13	12	13	13	13	12	50.4	50.4	50.4	36.053	335	17	18	18	18	8.73e-174	86862000	13090000	12535000	41511000	19726000	12253000	13787000	46299000	32940000	4
303	351;538;1219;1290;1323;1363;1948;2063;2609;2779;2829			IPI00219078;IPI00747443;IPI00177817;IPI00914019	IPI00219078;IPI00747443;IPI00177817;IPI00914019	IPI00219078	11;11;11;9	11;11;11;9	8;8;8;7	Calcium pump 2;Calcium-transporting ATPase sarcoplasmic reticulum type, slow twitch skeletal muscle isoform;Endoplasmic reticulum class 1/2 Ca(2+) ATPase;Sarcoplasmic/endoplasmic reticulum calcium ATPase 2;Putative uncharacterized protein ATP2A2;ATPase CA++ transporting cardiac muscle slow twitch 2;SERCA Ca(2+)-ATPase;cDNA FLJ55676, highly similar to Sarcoplasmic/endoplasmic reticulum calcium ATP…	ATP2A2;ATP2B	Isoform SERCA2B of Sarcoplasmic/endoplasmic reticulum calcium ATPase 2;Putative uncharacterized protein ATP2A2;Isoform SERCA2A of Sarcoplasmic/endoplasmic reticulum calcium ATPase 2;ATPase, Ca++ transporting, slow twitch 2 isoform 3	P16615-1;P16615;A6NDN7;P16615-2;B0FYL2;B1PM99;B4DF05	4	11	11	8	11	10	8	9	11	10	8	9	8	7	6	7	15.9	15.9	11	114.76	1042	13	13	10	12	6.69e-119	12062000	5218000	3928900	1698200	1216700	6637400	5224200	1531900	1699500	4
346	752;978;1378;1603;1621;2384;2473			IPI00219217;IPI00788938;IPI00789173	IPI00219217;IPI00788938;IPI00789173	IPI00219217	7;4;4	7;4;4	7;4;4	LDH heart subunit;L-lactate dehydrogenase B chain;Renal carcinoma antigen NY-REN-46;L-lactate dehydrogenase;Putative uncharacterized protein LDHB	LDHB;hCG_24788	L-lactate dehydrogenase B chain;L-lactate dehydrogenase;Putative uncharacterized protein LDHB	P07195;Q5U077;A8MW50;C9J7H8	3	7	7	7	6	6	7	7	6	6	7	7	6	6	7	7	23.1	23.1	23.1	36.638	334	9	9	9	9	1.04e-61	15065000	2100400	2347000	7127400	3490000	2095900	2806100	7552600	5863300	4
348	115;141;175;687;836;853;906;990;1174;1216;1322;1425;1476;1557;2242;2339;2607			IPI00219365;IPI00872814;IPI00017367;IPI00903145;IPI00922115;IPI00384282;IPI00869155	IPI00219365;IPI00872814	IPI00219365	17;17;6;6;5;3;1	17;17;6;6;5;3;1	11;11;0;0;4;0;0	Membrane-organizing extension spike protein;Moesin;MSN protein	MSN	Moesin;Putative uncharacterized protein MSN (Fragment)	P26038;Q6PJT4;A8MZ70	7	17	17	11	15	16	15	17	15	16	15	17	11	10	10	11	27.9	27.9	20.1	67.819	577	17	18	18	19	1.82e-100	20664000	3663900	4103600	7705700	5190700	4669500	4604100	8599000	7931400	4
349	270;464;2627;3116			IPI00219525;IPI00943153;IPI00910950	IPI00219525;IPI00943153;IPI00910950	IPI00219525	4;3;2	4;3;2	4;3;2	6-phosphogluconate dehydrogenase, decarboxylating;cDNA FLJ51182, highly similar to 6-phosphogluconate dehydrogenase, decarboxylating (EC 1.1.1.44);Putative uncharacterized protein PGD	PGD;PGDH;hCG_2006054;RP4-736L20.2-001	6-phosphogluconate dehydrogenase, decarboxylating;6-phosphogluconate dehydrogenase, decarboxylating;6-phosphogluconate dehydrogenase, decarboxylating	P52209;A8K2Y9;B4DQJ8;B4DV68;B4E2U0;B4DL86;A9Z1X1	3	4	4	4	4	4	4	4	4	4	4	4	4	4	4	4	15.9	15.9	15.9	53.139	483	4	4	5	5	8.05e-42	885160	79751	97974	453320	254110	59343	101140	495990	427780	4
89	1784;1787			IPI00219628;IPI00010466;IPI00385449	IPI00219628;IPI00010466;IPI00385449	IPI00219628	2;2;1	2;2;1	2;2;1	Protein kinase C beta type;Protein kinase C alpha type;Protein kinase C, alpha;Aging-associated gene 6 protein;Protein kinase C, alpha variant	PKCB;PRKCB;PRKCB1;PKCA;PRKACA;PRKCA;hCG_29268	Isoform Beta-II of Protein kinase C beta type;Isoform Beta-I of Protein kinase C beta type;Protein kinase C alpha type	P05771-2;P05771;C5IFJ8;P05771-1;P17252;B5BU22;Q2TSD3;Q59FI5	3	2	2	2	2	2	2	2	2	2	2	2	2	2	2	2	3.7	3.7	3.7	77.011	673	2	2	2	2	2.99e-24	703440	198680	168540	213650	122580	358750	178220	194280	139110	4
86	2780			IPI00219675;IPI00010271;IPI00010270;IPI00023138;IPI00877663;IPI00394837;IPI00878066	IPI00219675;IPI00010271;IPI00010270;IPI00023138;IPI00877663;IPI00394837;IPI00878066	IPI00219675	1;1;1;1;1;1;1	1;1;1;1;1;1;1	1;1;1;1;1;1;1	Cell migration-inducing gene 5 protein;p21-Rac1;Ras-like protein TC25;Ras-related C3 botulinum toxin substrate 1;cDNA FLJ77333, highly similar to Homo sapiens ras-related C3 botulinum toxin substrate 1 (rho family, small GTP binding protein Rac1) (RAC1), transcript variant Rac1b, mRNA;Ras-related C3 botulinum toxin substrate 1 (Rho family, small GTP binding protein Rac1);Ras-related C3 botulinum …	MIG5;RAC1;TC25;hCG_14926;tcag7.839;RAC2;RAC3;hCG_1811995;RP1-151B14.8-007;RP1-151B14.8-004	Isoform B of Ras-related C3 botulinum toxin substrate 1;Isoform A of Ras-related C3 botulinum toxin substrate 1;Ras-related C3 botulinum toxin substrate 2;Ras-related C3 botulinum toxin substrate 3;Ras-related C3 botulinum toxin substrate 2 (Rho family, sm	P63000-2;P63000;A4D2P0;P63000-1;A4D2P1;P15153;P60763;B1AH80;A4D2P2;B1AH77	7	1	1	1	1	1	1	1	1	1	1	1	1	1	1	1	3.8	3.8	3.8	23.467	211	1	1	1	1	0.006392	1858500	397740	355040	733220	372500	451520	430530	791890	600300	4
352	429;509;1628;1711;2057;2100;2684;2904;2995;3199			IPI00219682;IPI00377081;IPI00910709	IPI00219682;IPI00377081	IPI00219682	10;5;4	10;5;4	10;5;4	Erythrocyte band 7 integral membrane protein;Protein 7.2b;Stomatin;cDNA FLJ61192, highly similar to Erythrocyte band 7 integral membrane protein;cDNA FLJ52062, highly similar to Erythrocyte band 7 integral membrane protein	BND7;EPB72;STOM;RP11-342H3.1-002	Erythrocyte band 7 integral membrane protein;stomatin isoform b	P27105;B4DZK8;B4E2V5;B1AM77	3	10	10	10	10	10	10	10	10	10	10	10	10	10	10	10	52.1	52.1	52.1	31.73	288	14	14	12	14	2.77e-252	106930000	46056000	31628000	16434000	12813000	67666000	44504000	10035000	11785000	4
353	3146;3272			IPI00219729;IPI00945233;IPI00797802;IPI00796094	IPI00219729;IPI00945233;IPI00797802;IPI00796094	IPI00219729	2;2;2;1	2;2;2;1	2;2;2;1	Mitochondrial 2-oxoglutarate/malate carrier protein;Solute carrier family 25 member 11;cDNA FLJ76014, highly similar to Homo sapiens solute carrier family 25 (mitochondrial carrier; oxoglutarate carrier), member 11 (SLC25A11), mRNA;SLC25A11 protein;Solute carrier family 25 (Mitochondrial carrier; oxoglutarate carrier), member 11, isoform CRA_b	SLC20A4;SLC25A11;hCG_32694	Mitochondrial 2-oxoglutarate/malate carrier protein;solute carrier family 25 member 11 isoform 2;solute carrier family 25 member 11 isoform 3;34 kDa protein	Q02978;Q6IBH0	4	2	2	2	2	2	1	1	2	2	1	1	2	2	1	1	8	8	8	34.061	314	2	2	1	1	1.9e-09	620170	285340	231740	72111	30979	382920	308340	46560	31987	4
354	2174			IPI00219757;IPI00793319;IPI00554769	IPI00219757;IPI00793319;IPI00554769	IPI00219757	1;1;1	1;1;1	1;1;1	Glutathione S-transferase P;GST class-pi;GSTP1-1;Glutathione S-transferase pi;Putative uncharacterized protein GSTP1;Mutant GSTP1	FAEES3;GST3;GSTP1	Glutathione S-transferase P;Putative uncharacterized protein GSTP1;Mutant GSTP1	P09211;C7DJS1;C7DJS2;A8MX94;B2C310;Q5D6A5	3	1	1	1	1	0	1	1	1	0	1	1	1	0	1	1	5.2	5.2	5.2	23.356	210	1		1	1	0.00036	1022700	211110	0	460730	350890	191180	0	463310	622720	3
19	1247			IPI00220154;IPI00000807;IPI00936879;IPI00873959	IPI00220154;IPI00000807;IPI00936879;IPI00873959	IPI00220154	1;1;1;1	1;1;1;1	1;1;1;1	Dilute myosin heavy chain, non-muscle;Myosin heavy chain 12;Myosin-12;Myosin-Va;Myoxin;Myosin V;MYO5A variant protein;cDNA FLJ50342, highly similar to Myosin-5A;Myosin Va;Myosin Va variant	MYH12;MYO5A	Isoform 3 of Myosin-Va;Isoform 1 of Myosin-Va;Isoform 2 of Myosin-Va;myosin VA isoform 2	Q9Y4I1-3;Q9Y4I1;O95317;Q9Y4I1-1;A8MZC5;Q9UES4;Q9Y4I1-2;A8CDT9;B4E147;B5LY56;Q59FF5;Q9UES3	4	1	1	1	1	0	0	0	1	0	0	0	1	0	0	0	0.9	0.9	0.9	218.62	1880	1				0.044342	49829	49829	0	0	0	60274	0	0	0	1
356	221;321;495;518;604;606;827;993;1432;1691	40	40	IPI00220278;IPI00030929	IPI00220278;IPI00030929	IPI00220278	10;7	4;4	4;4	20 kDa myosin light chain;MLC-2C;Myosin regulatory light chain 2, smooth muscle isoform;Myosin regulatory light chain 9;Myosin regulatory light chain MRLC1;Myosin regulatory light polypeptide 9;Myosin RLC;MYL9 protein;Regulatory myosin light chain long version;Myosin, light chain 9, regulatory;Myosin, light polypeptide 9, regulatory, isoform CRA_c;Regulatory myosin light chain short version	MLC2;MRLC1;MYL9;MYRL2;hCG_1645602;RP5-977B1.9-002	Myosin regulatory light polypeptide 9;myosin regulatory light chain 9 isoform b	P24844;Q6IBG1;Q71U02;Q9BUF9	2	10	4	4	10	10	10	10	4	4	4	4	4	4	4	4	51.2	18	18	19.827	172	4	4	4	4	7.51e-235	17235000	6303800	5577100	3423800	1930200	8928200	7460400	2558400	2481200	4
357	586;747;1601;1701;1763;2008;3057			IPI00220301;IPI00910553	IPI00220301	IPI00220301	7;2	7;2	7;2	1-Cys peroxiredoxin;24 kDa protein;Acidic calcium-independent phospholipase A2;Antioxidant protein 2;Liver 2D page spot 40;Non-selenium glutathione peroxidase;Peroxiredoxin-6;Red blood cells page spot 12;Peroxiredoxin 6	AOP2;KIAA0106;PRDX6	Peroxiredoxin-6	P30041;A4UCS6	2	7	7	7	6	6	7	7	6	6	7	7	6	6	7	7	37.5	37.5	37.5	25.035	224	6	6	7	7	9.22e-55	7510800	917850	942370	3501100	2149500	746510	840950	3947900	3745500	4
358	22;181;460;485;764;917;1041;1199;1500;1667;1685;2041;2042;2064;2233;2234;2405;2462;2469;2478;2488;2497;2666;2667;2702;2728;3089;3144			IPI00220327;CON__P04264	IPI00220327;CON__P04264	IPI00220327	28;27	28;27	18;17	67 kDa cytokeratin;Cytokeratin-1;Hair alpha protein;Keratin, type II cytoskeletal 1;Keratin-1;Type-II keratin Kb1	KRT1;KRTA	Keratin, type II cytoskeletal 1;>P04264 SWISS-PROT:P04264 Tax_Id=9606 Gene_Symbol=KRT1 Keratin, type II cytoskeletal 1	P04264	2	28	28	18	24	25	27	28	24	25	27	28	14	15	17	18	48.1	48.1	33.2	66.038	644	28	29	30	31	1.09e-296	111170000	10815000	7428900	54321000	38608000	10436000	6622800	56026000	65771000	4
359	477;771;914;2939			IPI00220362;IPI00916763;IPI00916345;IPI00935986;IPI00935211;IPI00414878;IPI00938042	IPI00220362;IPI00916763;IPI00916345	IPI00220362	4;3;2;1;1;1;1	4;3;2;1;1;1;1	4;3;2;1;1;1;1	10 kDa chaperonin;10 kDa heat shock protein, mitochondrial;Chaperonin 10;Early-pregnancy factor;Chaperonin 10-related protein;Heat shock 10kDa protein 1 (Chaperonin 10), isoform CRA_b;Putative uncharacterized protein HSPE1;Heat shock 10kDa protein 1 (Chaperonin 10), isoform CRA_h	HSPE1;EPFP1;hCG_21429	10 kDa heat shock protein, mitochondrial;Putative uncharacterized protein HSPE1;Putative uncharacterized protein HSPE1	P61604;Q53X54;Q9UNM1;B8ZZL8;B8ZZ54	7	4	4	4	4	4	4	3	4	4	4	3	4	4	4	3	36.3	36.3	36.3	10.932	102	4	4	4	3	1.05e-11	3631600	1416100	1162800	751740	300940	1862800	1580700	616100	406780	4
360	65;1887;2581			IPI00220487;IPI00456049;IPI00792135;IPI00888359;IPI00887091	IPI00220487;IPI00456049;IPI00792135	IPI00220487	3;3;3;1;1	3;3;3;1;1	3;3;3;1;1	ATP synthase subunit d, mitochondrial;ATP5H protein	ATP5H;My032	Isoform 1 of ATP synthase subunit d, mitochondrial;Isoform 2 of ATP synthase subunit d, mitochondrial;ATP5H protein (Fragment)	O75947-1;O75947;B2R5L6;O75947-2;A0PJH2	5	3	3	3	3	3	3	3	3	3	3	3	3	3	3	3	21.7	21.7	21.7	18.491	161	3	4	3	4	1.55e-16	2751400	960740	1179400	406720	204480	1440600	1533400	286410	177650	4
361	444;2050;2122;2597;2831;3138;3186			IPI00220642;IPI00910779	IPI00220642;IPI00910779	IPI00220642	7;6	5;4	4;3	14-3-3 protein gamma;14-3-3 protein gamma, N-terminally processed;Protein kinase C inhibitor protein 1;cDNA FLJ14168 fis, clone NT2RP2001440, highly similar to 14-3-3 protein gamma;cDNA FLJ51843, highly similar to 14-3-3 protein gamma;cDNA FLJ52141, highly similar to 14-3-3 protein gamma	YWHAG	14-3-3 protein gamma;cDNA FLJ52141, highly similar to 14-3-3 protein gamma	P61981;B3KNB4;B4DHC4;B4DE78	2	7	5	4	7	7	7	7	5	5	5	5	4	4	4	4	32	24.7	21.1	28.302	247	7	6	6	6	2.4e-99	9130500	2651900	2178900	2507100	1792600	3439100	3006700	2423400	2561300	4
362	315;502;850			IPI00220739;IPI00922847	IPI00220739	IPI00220739	3;1	3;1	3;1	Membrane-associated progesterone receptor component 1;cDNA, FLJ94602, Homo sapiens progesterone receptor membrane component 1 (PGRMC1),mRNA;PGRMC1 protein;Progesterone receptor membrane component 1;Progesterone receptor membrane component 1, isoform CRA_a	HPR6.6;PGRMC;PGRMC1;hCG_23188	Membrane-associated progesterone receptor component 1	O00264;Q6IB11	2	3	3	3	3	3	2	2	3	3	2	2	3	3	2	2	27.2	27.2	27.2	21.671	195	3	3	2	2	2.71e-40	4069400	1215900	1152800	933490	767200	2525500	1302300	546300	764440	4
363	136;296;1759;1760;1952;3211			IPI00220741;IPI00641363	IPI00220741;IPI00641363	IPI00220741	6;6	6;6	6;6	Erythroid alpha-spectrin;Spectrin alpha chain, erythrocyte	SPTA;SPTA1	Isoform 1 of Spectrin alpha chain, erythrocyte;Isoform 2 of Spectrin alpha chain, erythrocyte	P02549-1;P02549;P02549-2;O60686	2	6	6	6	6	6	5	6	6	6	5	6	6	6	5	6	3.6	3.6	3.6	280	2419	7	7	6	7	7.21e-20	1078200	467750	232850	167480	210110	780110	160320	145950	287370	4
282	1526;1718;1903;2540			IPI00235412;IPI00871742;IPI00146935;IPI00555883;IPI00037283;IPI00942042;IPI00473085;IPI00909322;IPI00910662	IPI00235412;IPI00871742;IPI00146935;IPI00555883;IPI00037283;IPI00942042;IPI00473085;IPI00909322	IPI00235412	4;4;4;4;4;4;4;2;1	4;4;4;4;4;4;4;2;1	4;4;4;4;4;4;4;2;1	cDNA FLJ56381, highly similar to Dynamin-1-like protein (EC 3.6.5.5);Dnm1p/Vps1p-like protein;Dynamin family member proline-rich carboxyl-terminal domain less;Dynamin-1-like protein;Dynamin-like protein;Dynamin-like protein 4;Dynamin-like protein IV;Dynamin-related protein 1;Dynamin-like protein DYNIV-11 variant;cDNA FLJ59948, highly similar to Dynamin-1-like protein (EC 3.6.5.5);DNM1L protein;cD…	DLP1;DNM1L;DRP1	cDNA FLJ56381, highly similar to Dynamin-1-like protein;cDNA FLJ55044, highly similar to Dynamin-1-like protein;Isoform 1 of Dynamin-1-like protein;Isoform 2 of Dynamin-1-like protein;Isoform 5 of Dynamin-1-like protein;Isoform 3 of Dynamin-1-like protein;	B4DYR6;B4DSU8;Q59GN9;O00429-1;O00429;O00429-2;O00429-5;O00429-3;O00429-4;B4DPZ9;Q32Q67;B4DDQ3	9	4	4	4	3	4	4	4	3	4	4	4	3	4	4	4	9.4	9.4	9.4	85.377	763	4	5	5	5	4.68e-26	1121400	164450	182540	522360	252050	215430	200990	563920	382700	4
365	794			IPI00238434;IPI00477218	IPI00238434;IPI00477218	IPI00238434	1;1	1;1	1;1	Apolipoprotein L domain-containing protein 1;Vascular early response gene protein;Apolipoprotein L domain containing 1;cDNA, FLJ95166;HCG1658737, isoform CRA_b	APOLD1;VERGE;hCG_1658737	Isoform 1 of Apolipoprotein L domain-containing protein 1;Isoform 2 of Apolipoprotein L domain-containing protein 1	Q96LR9-1;Q96LR9;Q96LR9-2;A0AVN6	2	1	1	1	1	1	1	1	1	1	1	1	1	1	1	1	2.9	2.9	2.9	30.546	279	2	3	2	3	0.094934	10254000	1888300	2513500	468100	5384400	1701000	2763100	205520	9979700	4
315	557			IPI00243742;IPI00216070;IPI00220332	IPI00243742;IPI00216070;IPI00220332	IPI00243742	1;1;1	1;1;1	1;1;1	Cardiac myosin light chain 1;Myosin light chain 1, slow-twitch muscle B/ventricular isoform;Myosin light chain 3;Ventricular/slow twitch myosin alkali light chain;Myosin light chain 1/3, skeletal muscle isoform;Myosin light chain alkali 1/2;Putative uncharacterized protein MYL1	MYL3;MYL1	Myosin light chain 3;Myosin light chain 1, skeletal muscle isoform;Myosin light chain 3, skeletal muscle isoform	P08590;B2R534;P05976;Q53SD2;P06741;Q53R15	3	1	1	1	1	1	1	1	1	1	1	1	1	1	1	1	6.2	6.2	6.2	21.932	195	1	1	1	1	0.00092846	11071000	5154500	2985200	1724100	1207700	7164500	3836900	1290700	1501600	4
367	834;1291;1657;1861;2677;2805;2984;3002			IPI00288947;IPI00305551;IPI00000695;IPI00514067	IPI00288947;IPI00305551	IPI00288947	8;4;3;2	8;4;3;2	8;4;3;2	Guanine nucleotide-binding protein alpha-q;Guanine nucleotide-binding protein G(q) subunit alpha;cDNA FLJ50831, highly similar to Guanine nucleotide-binding protein G(q) subunit alpha;Guanine nucleotide-binding protein G(y) subunit alpha;Guanine nucleotide-binding protein subunit alpha-11;Guanine nucleotide-binding protein G, alpha subunit variant	GAQ;GNAQ;GA11;GNA11	Guanine nucleotide-binding protein G(q) subunit alpha;Guanine nucleotide-binding protein subunit alpha-11	P50148;B7Z581;P29992;Q59FM5	4	8	8	8	7	8	8	7	7	8	8	7	7	8	8	7	29.5	29.5	29.5	42.142	359	8	10	10	7	2.68e-53	7491400	2277100	2436200	1926200	851790	3089000	3281000	1582600	1275700	4
368	864;1786;1826;2513;2928;3214			IPI00290328;IPI00847732;IPI00943343	IPI00290328	IPI00290328	6;1;1	6;1;1	6;1;1	Density-enhanced phosphatase 1;HPTP eta;Protein-tyrosine phosphatase receptor type J;Receptor-type tyrosine-protein phosphatase eta	DEP1;PTPRJ	Receptor-type tyrosine-protein phosphatase eta precursor	Q12913	3	6	6	6	6	6	2	3	6	6	2	3	6	6	2	3	6.3	6.3	6.3	151.86	1392	6	6	2	3	3.43e-20	3901000	1909500	1409900	338410	243210	2434400	1639600	439720	366900	4
369	159;1237;1791			IPI00290928;IPI00922608	IPI00290928;IPI00922608	IPI00290928	3;2	3;2	3;2	Guanine nucleotide-binding protein subunit alpha-13;cDNA FLJ53108, highly similar to Guanine nucleotide-binding protein alpha-13 subunit;cDNA FLJ50732, highly similar to Guanine nucleotide-binding protein alpha-13 subunit	GNA13	Guanine nucleotide-binding protein subunit alpha-13;cDNA FLJ53108, highly similar to Guanine nucleotide-binding protein alpha-13 subunit	Q14344;B2R977;B4DWV9;B7Z7R0	2	3	3	3	2	3	2	2	2	3	2	2	2	3	2	2	9.8	9.8	9.8	44.049	377	2	3	2	2	2.4e-08	773480	239820	249760	189530	94380	357130	298360	167480	134160	4
370	153;1206;1314;1803;2821;2967			IPI00291006;IPI00924593;IPI00927864	IPI00291006;IPI00924593;IPI00927864	IPI00291006	6;4;4	6;4;4	6;4;4	Malate dehydrogenase, mitochondrial;Malate dehydrogenase;cDNA FLJ52880, highly similar to Malate dehydrogenase, mitochondrial (EC 1.1.1.37)	MDH2	Malate dehydrogenase, mitochondrial;cDNA FLJ52880, highly similar to Malate dehydrogenase, mitochondrial;Malate dehydrogenase	P40926;Q0QF37;Q6FHZ0;Q75MT9;B4DE44;B3KTM1	3	6	6	6	6	6	5	6	6	6	5	6	6	6	5	6	24.6	24.6	24.6	35.503	338	6	6	5	6	4.55e-47	6475600	2431500	2037400	1288900	717750	3273600	2793400	1106500	868470	4
372	376			IPI00291200;IPI00514905	IPI00291200;IPI00514905	IPI00291200	1;1	1;1	1;1	133 kDa nucleoporin;Nuclear pore complex protein Nup133;Nucleoporin Nup133;cDNA FLJ55441, highly similar to Nuclear pore complex protein Nup133;cDNA FLJ55448, highly similar to Nuclear pore complex protein Nup133;Putative uncharacterized protein NUP133;Nucleoporin 133kDa	NUP133;RP5-1068B5.4-002	Nuclear pore complex protein Nup133;Putative uncharacterized protein NUP133	Q8WUM0;B4E206;B4E3T7;A6NGS4;Q5T8N1	2	1	1	1	0	0	1	1	0	0	1	1	0	0	1	1	1	1	1	128.98	1156			1	1	0.0011877	5638000	0	0	5598800	39197	0	0	5660700	709.53	2
375	303;640;869;985;986;989;1661;2228;3158			IPI00291467;IPI00645646	IPI00291467;IPI00645646	IPI00291467	9;5	3;1	3;1	Adenine nucleotide translocator 3;ADP,ATP carrier protein 3;ADP,ATP carrier protein, isoform T2;ADP/ATP translocase 3;Solute carrier family 25 member 6;ADP,ATP carrier protein, liver isoform T2 variant;cDNA, FLJ92654, highly similar to Homo sapiens solute carrier family 25 (mitochondrial carrier; adenine nucleotide translocator), member 6 (SLC25A6), mRNA;SLC25A6 protein;Solute carrier family 25 (…	ANT3;CDABP0051;SLC25A6;hCG_1746794	ADP/ATP translocase 3;17 kDa protein	P12236;Q59EI9;Q6I9V5	2	9	3	3	9	9	8	7	3	3	3	2	3	3	3	2	28.2	9.7	9.7	32.866	298	3	3	3	2	2.68e-28	1296100	492340	409270	269710	124840	755590	507210	175120	162100	4
376	789;799;1136;1479;1491;1634;1841;1877;2705	44	167	IPI00291866;IPI00879931;IPI00556459;CON__P50448;IPI00877698	IPI00291866;IPI00879931;IPI00556459	IPI00291866	9;8;7;1;1	9;8;7;1;1	9;8;7;1;1	C1 esterase inhibitor;C1-inhibiting factor;Plasma protease C1 inhibitor;Serpin G1;cDNA FLJ58564, highly similar to Plasma protease C1 inhibitor;cDNA FLJ58826, highly similar to Plasma protease C1 inhibitor;Serine/cysteine proteinase inhibitor clade G member 1 splice variant 2	C1IN;C1NH;SERPING1	Plasma protease C1 inhibitor;cDNA FLJ58826, highly similar to Plasma protease C1 inhibitor;Serine/cysteine proteinase inhibitor clade G member 1 splice variant 2 (Fragment)	P05155;B4E1H2;B4E1F0;Q5UGI6	5	9	9	9	9	9	8	8	9	9	8	8	9	9	8	8	25.4	25.4	25.4	55.154	500	9	10	9	9	4.17e-39	11008000	1422500	1400000	3996900	4188100	684280	1211500	6113300	6236700	4
378	704;1258;1384;1864;2357			IPI00292530;IPI00953675;IPI00877852;IPI00383338;IPI00945924;CON__Q0VCM5;IPI00945755	IPI00292530;IPI00953675;IPI00877852	IPI00292530	5;4;3;2;2;1;1	5;4;3;2;2;1;1	5;4;3;2;2;1;1	Inter-alpha-trypsin inhibitor complex component III;Inter-alpha-trypsin inhibitor heavy chain H1;Serum-derived hyaluronan-associated protein;cDNA FLJ56954, highly similar to Inter-alpha-trypsin inhibitor heavy chain H1;cDNA FLJ56821, highly similar to Inter-alpha-trypsin inhibitor heavy chain H1;cDNA FLJ51523, highly similar to Inter-alpha-trypsin inhibitor heavy chain H1;cDNA FLJ54395, highly si…	IGHEP1;ITIH1	Inter-alpha-trypsin inhibitor heavy chain H1;inter-alpha (globulin) inhibitor H1 isoform b;inter-alpha (globulin) inhibitor H1 isoform c	P19827;A8K9N5;B7Z539;B7Z549;B7Z558;B7Z8B6;B7Z8C0;C9JGJ6	7	5	5	5	5	5	4	5	5	5	4	5	5	5	4	5	8.9	8.9	8.9	101.39	911	6	6	5	6	4.55e-59	4658000	854010	1110200	319910	2373900	639060	1317100	208340	4436400	4
381	701;1172;2205;2571			IPI00292950;IPI00879573	IPI00292950;IPI00879573	IPI00292950	4;4	4;4	4;4	Serpin peptidase inhibitor, clade D (Heparin cofactor), member 1;Heparin cofactor 2;Heparin cofactor II;Protease inhibitor leuserpin-2;Serpin D1	SERPIND1;HCF2	Serpin peptidase inhibitor, clade D (Heparin cofactor), member 1;Heparin cofactor 2	Q8IVC0;P05546	2	4	4	4	3	3	4	4	3	3	4	4	3	3	4	4	6.1	6.1	6.1	60.178	527	3	3	4	4	6.72e-08	2488400	505030	550560	520950	911840	665960	993840	368210	1281900	4
382	1201;1357			IPI00294004;IPI00878131;IPI00795619	IPI00294004;IPI00878131;IPI00795619	IPI00294004	2;2;1	2;2;1	2;2;1	Vitamin K-dependent protein S;Protein S;cDNA FLJ56936, highly similar to Vitamin K-dependent protein S;PS24;Truncated protein S alpha variant;PROS1 protein;Protein S alpha variant	PROS;PROS1	Vitamin K-dependent protein S;cDNA FLJ56936, highly similar to Vitamin K-dependent protein S;PROS1 protein	P07225;Q16519;Q8IXD0;Q9NSD0;B4E1L6;Q8IXC3;Q8IXD1;Q8IXD4;Q06F35;Q16441;Q1W146;Q1W147;Q1W148;Q7KYZ1;Q86Z10;Q8IXC8;Q8IXD2	3	2	2	2	2	2	2	2	2	2	2	2	2	2	2	2	5.8	5.8	5.8	75.122	676	2	2	2	2	9.87e-10	1297600	346740	288040	333440	329410	486100	350520	288940	530710	4
272	1082;1779;1797;1798;2959			IPI00294779;IPI00031804	IPI00294779;IPI00031804	IPI00294779	5;5	5;5	5;5	Outer mitochondrial membrane protein porin 3;Voltage-dependent anion-selective channel protein 3	VDAC3	Isoform 2 of Voltage-dependent anion-selective channel protein 3;Isoform 1 of Voltage-dependent anion-selective channel protein 3	Q9Y277-2;Q9Y277;Q9Y277-1	2	5	5	5	5	4	4	4	5	4	4	4	5	4	4	4	18.7	18.7	18.7	30.789	284	5	4	4	4	1.35e-21	15936000	7736600	4885100	2229400	1085000	10469000	7176800	1196600	867690	4
385	2006;2938			IPI00295339;IPI00643835;IPI00514233;IPI00644144;IPI00646956;IPI00514796;IPI00640405;IPI00645234	IPI00295339;IPI00643835;IPI00514233;IPI00644144;IPI00646956;IPI00514796;IPI00640405;IPI00645234	IPI00295339	2;2;2;2;2;2;2;2	2;2;2;2;2;2;2;2	2;2;2;2;2;2;2;2	CD62 antigen-like family member P;Granule membrane protein 140;Leukocyte-endothelial cell adhesion molecule 3;Platelet activation dependent granule-external membrane protein;P-selectin;cDNA, FLJ93328, highly similar to Homo sapiens selectin P (granule membrane protein 140kDa, antigen CD62) (SELP), mRNA;Selectin P (Granule membrane protein 140kDa, antigen CD62);SELP protein;Selectin P (Granule mem…	GMRP;GRMP;SELP;RP1-86F14.2-002;RP1-86F14.2-006;hCG_38007;RP1-86F14.2-005;RP1-86F14.2-007;RP1-86F14.2-004;RP1-86F14.2-008;RP1-86F14.2-003	P-selectin;Selectin P;Selectin P;Selectin P (Granule membrane protein 140kDa, antigen CD62), isoform CRA_a;Selectin P;Selectin P;Selectin P;Selectin P	P16109;B2R785;Q6NUL9;Q5R349;Q8N1E9;Q5R345;Q5R341;Q5R348;Q5R342;Q5R350;Q5R343;Q6ULR6	8	2	2	2	1	2	1	1	1	2	1	1	1	2	1	1	2.7	2.7	2.7	90.833	830	2	3	2	2	1.94e-17	2354200	658280	1064800	444580	186610	1140400	958630	524300	308150	4
386	1734			IPI00295542;IPI00893190;IPI00892657;IPI00892782;IPI00892540;IPI00953072;IPI00893068	IPI00295542;IPI00893190;IPI00892657;IPI00892782;IPI00892540;IPI00953072;IPI00893068	IPI00295542	1;1;1;1;1;1;1	1;1;1;1;1;1;1	1;1;1;1;1;1;1	CALNUC;Nucleobindin-1;cDNA FLJ77770, highly similar to Homo sapiens nucleobindin 1 (NUCB1), mRNA;cDNA FLJ40471 fis, clone TESTI2042508, highly similar to Nucleobindin-1;Nucleobindin 1 variant;NUCB1 protein;cDNA FLJ52898, highly similar to Nucleobindin-1;Putative uncharacterized protein NUCB1	NUC;NUCB1	Nucleobindin-1;cDNA FLJ52898, highly similar to Nucleobindin-1;Putative uncharacterized protein NUCB1;Putative uncharacterized protein NUCB1;Putative uncharacterized protein NUCB1;Putative uncharacterized protein NUCB1;Putative uncharacterized protein NUCB	Q02818;A8K7Q1;B3KUR6;Q53GX6;Q96BA4;B4DZX0;C9JMD9;C9JKZ2;C9JE64;C9J3C1;C9JBD3	7	1	1	1	1	1	1	1	1	1	1	1	1	1	1	1	2.2	2.2	2.2	53.879	461	2	2	1	2	0.053981	562910	120330	70628	169120	202840	162030	64276	144010	361080	4
387	157;422;501;525;748;1241;1343;1939;2423;2549;2766;2889	45	216	IPI00295618;IPI00871352;IPI00470719;IPI00914041;IPI00470720;IPI00470722;IPI00936213	IPI00295618;IPI00871352;IPI00470719;IPI00914041;IPI00470720;IPI00470722	IPI00295618	12;12;12;12;12;12;1	12;12;12;12;12;12;1	12;12;12;12;12;12;1	EndoCAM;GPIIA';PECA1;Platelet endothelial cell adhesion molecule;cDNA FLJ76270, highly similar to Homo sapiens platelet/endothelial cell adhesion molecule (CD31 antigen) (PECAM1), mRNA;cDNA FLJ58394, highly similar to Platelet endothelial cell adhesion molecule	PECAM1	Isoform Long of Platelet endothelial cell adhesion molecule;Isoform Delta15 of Platelet endothelial cell adhesion molecule;Isoform Delta12 of Platelet endothelial cell adhesion molecule;Isoform Delta14 of Platelet endothelial cell adhesion molecule;Isoform	P16284-1;P16284;A8K3S7;B7Z8Y6;P16284-6;P16284-2;P16284-4;P16284-3;P16284-5	7	12	12	12	12	11	10	11	12	11	10	11	12	11	10	11	20.9	20.9	20.9	82.535	738	15	14	11	15	1.18e-126	39151000	10689000	8080600	3147100	17234000	25608000	18048000	3959000	6587100	4
388	135;214;327;645;743;744;866;881;888;889;995;1003;1018;1092;1370;1398;1399;1740;1767;2090;2115;2376;2529;2808;2929;3079			IPI00295976;IPI00218628;IPI00218629;IPI00922182	IPI00295976;IPI00218628;IPI00218629	IPI00295976	26;25;24;8	26;25;24;8	26;25;24;8	GPalpha IIb;Integrin alpha-IIb;Integrin alpha-IIb heavy chain;Integrin alpha-IIb light chain, form 1;Integrin alpha-IIb light chain, form 2;Platelet membrane glycoprotein IIb;Glycoprotein IIb;cDNA FLJ56496, highly similar to Integrin alpha-IIb;Integrin subunit aIIb;Integrin alpha-IIb variant	GP2B;ITGA2B;ITGAB	Isoform 1 of Integrin alpha-IIb;Isoform 2 of Integrin alpha-IIb;Isoform 3 of Integrin alpha-IIb	P08514-1;P08514;Q6LDK5;P08514-2;P08514-3;B4DLU2;Q0MVN7;Q59FA8	4	26	26	26	26	25	25	26	26	25	25	26	26	25	25	26	29.9	29.9	29.9	113.38	1039	40	32	31	32	0	460680000	197720000	147920000	74722000	40327000	260540000	212070000	54747000	44429000	4
389	70;172;286;314;331;361;790;797;828;833;854;898;922;999;1045;1049;1192;1193;1280;1302;1410;1441;1577;1909;1994;2296;2321;2464;2690;2691;2720	46	1132	IPI00296099;CON__Q28194;IPI00796249;IPI00018769;IPI00642455;IPI00329535	IPI00296099;CON__Q28194	IPI00296099	31;23;5;4;4;1	31;23;5;4;4;1	31;23;5;4;4;1	Thrombospondin-1;THBS1 protein;cDNA FLJ51203, highly similar to Thrombospondin-1;Thrombospondin 1 variant;Thrombospondin-1p180	THBS1;TSP;TSP1	Thrombospondin-1;>Q28194 TREMBL:Q28194 (Bos taurus) Thrombospondin-1	P07996;A0PJG0;B4E3J7;Q59E99;Q7KYY3;Q28194	6	31	31	31	30	30	29	29	30	30	29	29	30	30	29	29	26.8	26.8	26.8	129.38	1170	52	41	39	38	0	383290000	175240000	114340000	63702000	30000000	240050000	149260000	48745000	35109000	4
390	1083;1558;1921;2184;2270;2698;2936;3098;3236;3237			IPI00296165;IPI00923551;IPI00941440;IPI00791901	IPI00296165;IPI00923551	IPI00296165	10;8;4;4	10;8;4;4	10;8;4;4	Complement C1r subcomponent;Complement C1r subcomponent heavy chain;Complement C1r subcomponent light chain;Complement component 1 subcomponent r;cDNA FLJ75066, highly similar to Homo sapiens complement component 1, r subcomponent (C1R), mRNA;cDNA FLJ54471, highly similar to Complement C1r subcomponent (EC 3.4.21.41);Complement component 1, r subcomponent variant;cDNA FLJ54318, highly similar to …	C1R	cDNA FLJ54471, highly similar to Complement C1r subcomponent;cDNA FLJ54318, highly similar to Complement C1r subcomponent	P00736;A8K5J8;B4DPQ0;Q53HT9;Q53HU9;B4E1B0	4	10	10	10	6	4	10	7	6	4	10	7	6	4	10	7	18.9	18.9	18.9	81.889	719	6	4	13	7	4.5e-108	53561000	357060	157210	52402000	644640	36802	6747.5	54000000	27070	4
391	1062;1699;2595;2614;2718;3119			IPI00297084;IPI00910419	IPI00297084;IPI00910419	IPI00297084	6;5	6;5	6;5	Dolichyl-diphosphooligosaccharide--protein glycosyltransferase 48 kDa subunit;cDNA FLJ55714, highly similar to Dolichyl-diphosphooligosaccharide--protein glycosyltransferase 48 kDa subunit (EC 2.4.1.119);cDNA FLJ52929, highly similar to Dolichyl-diphosphooligosaccharide--proteinglycosyltransferase 48 kDa subunit (EC2.4.1.119)	DDOST;KIAA0115;OK/SW-cl.45;OST48	Dolichyl-diphosphooligosaccharide--protein glycosyltransferase 48 kDa subunit;cDNA FLJ52929, highly similar to Dolichyl-diphosphooligosaccharide--proteinglycosyltransferase 48 kDa subunit	P39656;B4DLI2;B4DJE3	2	6	6	6	6	5	5	3	6	5	5	3	6	5	5	3	25.9	25.9	25.9	50.8	456	6	5	5	3	7.34e-23	3961000	1903000	872170	1003100	182690	2551600	989320	757540	439170	4
393	243;322;512;646;661;792;1055;1068;1159;1409;1501;1604;1764;1986;2124;2229;2511;2559;2850			IPI00297550;IPI00855773;IPI00642188;IPI00855854	IPI00297550	IPI00297550	19;4;4;2	19;4;4;2	19;4;4;2	Coagulation factor XIII A chain;Protein-glutamine gamma-glutamyltransferase A chain;Transglutaminase A chain;cDNA, FLJ93141, highly similar to Homo sapiens coagulation factor XIII, A1 polypeptide (F13A1), mRNA	F13A;F13A1	Coagulation factor XIII A chain	P00488;B2R6V9	4	19	19	19	17	17	19	17	17	17	19	17	17	17	19	17	36.5	36.5	36.5	83.266	732	21	20	24	21	2.93e-172	90910000	18079000	14141000	40661000	18029000	20075000	16865000	44496000	28416000	4
396	2975			IPI00298237;IPI00939667;IPI00554538;IPI00909516;IPI00554617;IPI00922058	IPI00298237;IPI00939667;IPI00554538;IPI00909516;IPI00554617;IPI00922058	IPI00298237	1;1;1;1;1;1	1;1;1;1;1;1	1;1;1;1;1;1	cDNA, FLJ92718, highly similar to Homo sapiens tripeptidyl peptidase I (TPP1), mRNA;cDNA FLJ56402, highly similar to Tripeptidyl-peptidase 1 (EC 3.4.14.9);Tripeptidyl-peptidase I variant;Cell growth-inhibiting gene 1 protein;Lysosomal pepstatin-insensitive protease;Tripeptidyl aminopeptidase;Tripeptidyl-peptidase 1;Tripeptidyl-peptidase I;Putative uncharacterized protein TPP1;cDNA FLJ58558, highl…	CLN2;GIG1;TPP1;UNQ267/PRO304	cDNA FLJ56402, highly similar to Tripeptidyl-peptidase 1;Isoform 1 of Tripeptidyl-peptidase 1;Putative uncharacterized protein TPP1;cDNA FLJ58558, highly similar to Tripeptidyl-peptidase 1;cDNA FLJ57277, highly similar to Tripeptidyl-peptidase 1;cDNA FLJ59	B2R608;B4DIV8;Q53HP2;O14773-1;O14773;B5MDC1;B4E0C7;O14773-2;B4DSE2;B4DE89	6	1	1	1	0	0	0	1	0	0	0	1	0	0	0	1	4.7	4.7	4.7	62.211	572				1	1.37e-08	61808	0	0	0	61808	0	0	0	98841	1
397	36;124;720;1366;1613;1724;1725;2060;2178;2187;2249;2969;3220			IPI00298267;IPI00298268;IPI00018109;IPI00513747	IPI00298267;IPI00298268	IPI00298267	13;13;1;1	13;13;1;1	13;13;1;1	Cyclooxygenase-1;Prostaglandin G/H synthase 1;Prostaglandin H2 synthase 1;Prostaglandin-endoperoxide synthase 1;cDNA FLJ53280, highly similar to Prostaglandin G/H synthase 1 (EC 1.14.99.1);Cyclooxygenase 1b3;Cyclooxygenase 1b2;cDNA FLJ61263, highly similar to Prostaglandin G/H synthase 1 (EC 1.14.99.1)	COX1;PTGS1;PTSG1	Cyclooxygenase 1b3;Isoform Short of Prostaglandin G/H synthase 1	P23219-1;P23219;B4E2S5;Q3HY28;Q3HY29;P23219-2;B4DHQ2;Q6LCE7	4	13	13	13	13	13	13	12	13	13	13	12	13	13	13	12	28.3	28.3	28.3	71.716	630	16	16	15	15	2.12e-116	24376000	9601000	8285200	4202300	2287800	12993000	11686000	3462700	2165800	4
383	703;1567;1675			IPI00298406;IPI00902588;IPI00294398	IPI00298406;IPI00902588;IPI00294398	IPI00298406	3;3;3	3;3;3	3;3;3	Hydroxyacyl-coenzyme A dehydrogenase, mitochondrial;Medium and short-chain L-3-hydroxyacyl-coenzyme A dehydrogenase;Short-chain 3-hydroxyacyl-CoA dehydrogenase;cDNA FLJ38699 fis, clone KIDNE2002168, highly similar to Short chain 3-hydroxyacyl-CoA dehydrogenase, mitochondrial (EC 1.1.1.35);cDNA, FLJ95242, highly similar to Homo sapiens L-3-hydroxyacyl-Coenzyme A dehydrogenase, short chain (HADHSC)…	HAD;HADH;HADHSC;SCHAD	Isoform 2 of Hydroxyacyl-coenzyme A dehydrogenase, mitochondrial;cDNA FLJ38699 fis, clone KIDNE2002168, highly similar to Short chain 3-hydroxyacyl-CoA dehydrogenase, mitochondrial;Isoform 1 of Hydroxyacyl-coenzyme A dehydrogenase, mitochondrial	Q16836-2;Q16836;B3KTT6;Q16836-1;B2RB06;Q4W5B4	3	3	3	3	3	3	3	3	3	3	3	3	3	3	3	3	12.1	12.1	12.1	42.123	390	4	4	4	4	1.55e-17	1720900	626760	460920	394490	238710	841390	650620	348430	296590	4
399	82;392;395;515;527;915;916;1040;1101;1131;1328;1427;1428;1923;1924;2101;2144;2193;2210;2456;2725;2726;3216;3252	47;48	335;477	IPI00298497;CON__P02676;IPI00816687	IPI00298497	IPI00298497	24;3;3	24;3;3	24;3;3	Fibrinogen beta chain;Fibrinopeptide B;cDNA FLJ53952, highly similar to Fibrinogen beta chain	FGB	Fibrinogen beta chain	P02675;B4E1D3;Q32Q65	3	24	24	24	24	24	23	24	24	24	23	24	24	24	23	24	50.1	50.1	50.1	55.928	491	33	33	31	33	0	562750000	140480000	148780000	145070000	128420000	167780000	195570000	140460000	211080000	4
401	471;472;725;1390;2262			IPI00298971;CON__Q3ZBS7	IPI00298971	IPI00298971	5;1	5;1	5;1	Serum-spreading factor;Somatomedin-B;S-protein;V75;Vitronectin;Vitronectin V10 subunit;Vitronectin V65 subunit;cDNA FLJ51266, highly similar to Vitronectin	VTN	Vitronectin	P04004;B7Z553	2	5	5	5	5	5	4	3	5	5	4	3	5	5	4	3	12.3	12.3	12.3	54.305	478	5	5	4	3	2.21e-50	22692000	10135000	7422100	1991700	3143000	12825000	9753300	1902100	4501400	4
402	0;60;83;85;105;108;109;123;137;226;229;248;288;329;364;410;412;490;554;639;666;671;699;736;742;772;947;953;1035;1042;1063;1074;1249;1299;1335;1509;1511;1591;1596;1624;1639;1679;1687;1892;1973;1974;2021;2048;2188;2195;2260;2308;2312;2349;2372;2467;2510;2696;2716;2722;2765;2797;2806;2866;2867;2918;2953;3012;3017;3141;3266;3271			IPI00298994;IPI00642355;IPI00219299	IPI00298994	IPI00298994	72;9;8	72;9;8	72;9;8	Talin-1;Talin 1	KIAA1027;TLN;TLN1;RP11-112J3.1-001	Talin-1	Q9Y490;Q5TCU6	3	72	72	72	72	71	69	72	72	71	69	72	72	71	69	72	42.7	42.7	42.7	269.76	2541	103	105	100	104	0	654580000	148040000	141750000	232040000	132750000	187900000	187170000	238510000	195160000	4
403	564;2700;2935;2946			IPI00299048;IPI00871809;IPI00871709	IPI00299048;IPI00871809;IPI00871709	IPI00299048	4;3;2	4;3;2	4;3;2	Ras GTPase-activating-like protein IQGAP2;cDNA FLJ51769, highly similar to Ras GTPase-activating-like protein IQGAP2;cDNA FLJ52367, highly similar to Ras GTPase-activating-like protein IQGAP2;IQ motif containing GTPase activating protein 2 variant;cDNA FLJ52376, highly similar to Ras GTPase-activating-like protein IQGAP2	IQGAP2	Isoform 1 of Ras GTPase-activating-like protein IQGAP2;Isoform 2 of Ras GTPase-activating-like protein IQGAP2;cDNA FLJ50398, highly similar to Ras GTPase-activating-like protein IQGAP2	Q13576-1;Q13576;A8K4V1;B7Z7U6;B7Z7X2;Q59HA3;Q13576-2;B7Z881;B7Z8A4	3	4	4	4	3	4	4	4	3	4	4	4	3	4	4	4	4.6	4.6	4.6	180.61	1575	3	4	4	4	4.48e-25	941080	182630	223330	313350	221770	283670	326400	318170	252690	4
405	106;1025;1888;2651			IPI00299571;IPI00644989	IPI00299571;IPI00644989	IPI00299571	4;4	4;4	4;4	Protein disulfide isomerase P5;Protein disulfide-isomerase A6;Thioredoxin domain-containing protein 7;cDNA FLJ16143 fis, clone BRAMY2038516, highly similar to Protein disulfide-isomerase A6 (EC 5.3.4.1);Putative uncharacterized protein PDIA6;cDNA FLJ58023, highly similar to Protein disulfide-isomerase A6 (EC 5.3.4.1);cDNA FLJ58502, highly similar to Protein disulfide-isomerase A6 (EC 5.3.4.1);cDN…	PDIA6;TXNDC7;hCG_22033;P5	Isoform 2 of Protein disulfide-isomerase A6;Isoform 1 of Protein disulfide-isomerase A6	Q15084-2;Q15084;B3KY95;B5MBW7;B7Z4M8;Q15084-1;B7Z254;Q53RC7	2	4	4	4	3	3	4	3	3	3	4	3	3	3	4	3	13.4	13.4	13.4	53.9	492	3	3	4	3	1.43e-57	2984200	483200	524440	1493400	483210	591340	772440	1423200	749330	4
409	2250			IPI00303161;IPI00892879;IPI00892952	IPI00303161;IPI00892879;IPI00892952	IPI00303161	1;1;1	1;1;1	1;1;1	Endothelial cell-selective adhesion molecule;Putative uncharacterized protein ESAM	ESAM;UNQ220/PRO246	Endothelial cell-selective adhesion molecule;Putative uncharacterized protein ESAM;Putative uncharacterized protein ESAM	Q96AP7;C9JS10;C9JIE7	3	1	1	1	1	1	1	1	1	1	1	1	1	1	1	1	4.4	4.4	4.4	41.176	390	2	2	2	2	9.89e-05	337360	134750	90110	62061	50441	194400	126120	44795	58222	4
410	101;290;510;803;1027;1156;1213;1215;2000;2288;2433;2913;3085	50	150	IPI00303283;IPI00220351;IPI00220350	IPI00303283;IPI00220351;IPI00220350	IPI00303283	13;10;10	13;10;10	13;10;10	Integrin beta-3;Platelet membrane glycoprotein IIIa;Integrin beta	GP3A;ITGB3	Isoform Beta-3A of Integrin beta-3;Isoform Beta-3C of Integrin beta-3;Isoform Beta-3B of Integrin beta-3	P05106-1;P05106;P05106-3;P05106-2;A7U833;B4DTY9;Q1PBM2;Q2YFE1	3	13	13	13	13	13	12	13	13	13	12	13	13	13	12	13	18.7	18.7	18.7	87.057	788	50	39	23	27	1.85e-176	171020000	72537000	60760000	22579000	15140000	98766000	83081000	17311000	14822000	4
411	84;414;556;774;830;904;1030;1282;1287;1306;1309;1434;1839;2202;2492;2493;2669;2751;2785;2811;2812;2912;3049			IPI00303476;IPI00790847;IPI00791498;IPI00792534;IPI00793271;IPI00792128	IPI00303476	IPI00303476	23;6;5;4;4;2	23;6;5;4;4;2	23;6;5;4;4;2	ATP synthase subunit beta, mitochondrial;ATP synthase subunit beta	ATP5B;ATPMB;ATPSB	ATP synthase subunit beta, mitochondrial	P06576;Q0QEN7	6	23	23	23	23	23	22	22	23	23	22	22	23	23	22	22	66.4	66.4	66.4	56.559	529	28	28	27	26	0	58845000	23508000	19307000	10499000	5530700	32886000	26650000	7934400	5555100	4
412	770			IPI00303954;IPI00641334	IPI00303954;IPI00641334	IPI00303954	1;1	1;1	1;1	Cytochrome b5 outer mitochondrial membrane isoform;Cytochrome b5 type B;Putative uncharacterized protein DKFZp686M0619	CYB5B;CYB5M;OMB5;DKFZp686M0619	cytochrome b5 outer mitochondrial membrane precursor;Putative uncharacterized protein DKFZp686M0619	O43169;Q5HYD9	2	1	1	1	1	1	1	1	1	1	1	1	1	1	1	1	22.7	22.7	22.7	16.694	150	1	1	1	1	9.43e-09	1764500	746420	494130	313760	210140	804760	814850	279660	299530	4
413	98;145;618;1186;1187;1331;1457;1508;1544;1573;1584;1662;1692;1806;2252;2366;2373;2422;2474;2475;2476;2717;2747;2748;2846;2964			IPI00304273;CON__Q32PJ2	IPI00304273	IPI00304273	26;1	26;1	2;0	Apolipoprotein A4;Apolipoprotein A-IV;APOA4 protein	APOA4	Apolipoprotein A-IV	P06727;Q13784	2	26	26	2	25	25	24	26	25	25	24	26	2	2	2	2	66.9	66.9	3	45.398	396	31	30	29	31	3.14e-202	130770000	34730000	24077000	36911000	35051000	40189000	29638000	36460000	60169000	4
415	58;81;766;851;1318;1387;1388;1391;1863;2120;2533			IPI00305461;IPI00645038;IPI00910636;IPI00514159;CON__Q9TRI1	IPI00305461;IPI00645038;IPI00910636	IPI00305461	11;11;7;4;3	11;11;7;4;3	11;11;7;4;3	Inter-alpha-trypsin inhibitor complex component II;Inter-alpha-trypsin inhibitor heavy chain H2;Serum-derived hyaluronan-associated protein;cDNA FLJ75038, highly similar to Homo sapiens inter-alpha (globulin) inhibitor H2 (ITIH2), mRNA;Inter-alpha (Globulin) inhibitor H2;Inter-alpha (Globulin) inhibitor H2, isoform CRA_b;cDNA FLJ53848, highly similar to Inter-alpha-trypsin inhibitor heavy chain H2	IGHEP2;ITIH2;hCG_25115;RP11-264C14.2-002	Inter-alpha-trypsin inhibitor heavy chain H2;Inter-alpha (Globulin) inhibitor H2;cDNA FLJ53848, highly similar to Inter-alpha-trypsin inhibitor heavy chain H2	P19823;A2RTY6;Q5T985;B4DM79	5	11	11	11	9	10	7	11	9	10	7	11	9	10	7	11	17	17	17	106.46	946	10	10	7	11	4.96e-41	9634100	1748800	2429400	756640	4699400	2258800	3068200	486470	7750000	4
416	521;988;1038;1435;1475;1700;2091;2169;2170;2197;2265;2412;2461			IPI00306311;IPI00742980	IPI00306311;IPI00742980	IPI00306311	13;10	13;10	13;10	Platelet 47 kDa protein;Pleckstrin;PLEK protein variant	P47;PLEK	Pleckstrin;PLEK protein variant (Fragment)	P08567;Q59GZ2	2	13	13	13	13	13	13	13	13	13	13	13	13	13	13	13	39.7	39.7	39.7	40.096	350	17	18	17	17	8.1e-190	55899000	5616200	7160400	29750000	13372000	4897000	7697700	34091000	20605000	4
294	662			IPI00306325;IPI00844079;IPI00645319;IPI00155168;IPI00647613	IPI00306325;IPI00844079;IPI00645319;IPI00155168;IPI00647613	IPI00306325	1;1;1;1;1	1;1;1;1;1	1;1;1;1;1	Protein tyrosine phosphatase, receptor type, C;Protein tyrosine phosphatase, receptor type, C, isoform CRA_d;Leukocyte common antigen;Receptor-type tyrosine-protein phosphatase C;T200;cDNA FLJ53186, highly similar to Leukocyte common antigen (EC 3.1.3.48);PTPRC protein;CD45	hCG_1811178;PTPRC;RP11-553K8.4-001;CD45;RP11-553K8.4-010;RP11-553K8.4-002;RP11-553K8.4-011	Protein tyrosine phosphatase, receptor type, C, isoform CRA_d;Isoform 1 of Leukocyte common antigen;protein tyrosine phosphatase, receptor type, C isoform 3 precursor;Protein tyrosine phosphatase, receptor type, C;Isoform 2 of Leukocyte common antigen	B1ALS2;P08575-1;P08575;B4DSZ5;B1ALS1;Q6PJK7;Q6QIM3;B1ALS3;P08575-2;Q5T9M0;Q6QIN1;Q6QIN9	5	1	1	1	1	1	0	1	1	1	0	1	1	1	0	1	1	1	1	147.48	1306	1	1		1	0.0012207	72216	28790	21181	0	22245	37193	26659	0	34242	3
364	306			IPI00306667;IPI00220993	IPI00306667;IPI00220993	IPI00306667	1;1	1;1	1;1	2',3'-cyclic-nucleotide 3'-phosphodiesterase;cDNA FLJ59866, highly similar to 2',3'-cyclic-nucleotide 3'-phosphodiesterase (EC 3.1.4.37);cDNA FLJ52954, highly similar to 2',3'-cyclic-nucleotide 3'-phosphodiesterase(EC 3.1.4.37)	CNP	Isoform CNPII of 2',3'-cyclic-nucleotide 3'-phosphodiesterase;Isoform CNPI of 2',3'-cyclic-nucleotide 3'-phosphodiesterase	P09543-1;P09543;P09543-2;B4DFN6;B4DI06	2	1	1	1	1	1	1	1	1	1	1	1	1	1	1	1	3.1	3.1	3.1	47.578	421	1	1	1	1	0.011612	72224	18157	13969	23871	16228	21707	16975	24255	27113	4
417	1956			IPI00307155;IPI00894514	IPI00307155;IPI00894514	IPI00307155	1;1	1;1	1;1	p164 ROCK-2;Rho kinase 2;Rho-associated protein kinase 2;Rho-associated, coiled-coil-containing protein kinase 2;cDNA FLJ51533, highly similar to Rho-associated protein kinase 2 (EC 2.7.11.1);ROCK2 protein	KIAA0619;ROCK2	Rho-associated protein kinase 2;cDNA FLJ51533, highly similar to Rho-associated protein kinase 2	O75116;B4DRJ9;Q14DU5	2	1	1	1	1	1	1	1	1	1	1	1	1	1	1	1	0.7	0.7	0.7	160.9	1388	1	1	1	1	0.0021565	120030	40144	25193	35965	18729	54371	32408	33085	27553	4
371	91;103;178;227;482;603;613;664;665;933;934;935;1075;1274;1308;1329;1439;1505;1630;1850;1890;1937;1951;1959;1966;2071;2088;2287;2355;2429;2479;2485;2486;2615;2674;2685;2730;2813;2940;2952;3001;3097			IPI00307162;IPI00291175;IPI00910496;IPI00909711;IPI00384973	IPI00307162;IPI00291175;IPI00910496	IPI00307162	42;42;21;12;9	42;42;21;12;9	42;42;21;12;9	Metavinculin;Vinculin;cDNA FLJ59659, highly similar to Vinculin;cDNA FLJ45031 fis, clone BRAWH3018548, highly similar to Vinculin;cDNA FLJ55698, highly similar to Vinculin	VCL;RP11-178G16.3-002	Isoform 2 of Vinculin;Isoform 1 of Vinculin;cDNA FLJ55698, highly similar to Vinculin	P18206-1;P18206;B4E3Q9;Q5JQ13;P18206-2;B3KXA2;B4DKC9	5	42	42	42	38	38	40	40	38	38	40	40	38	38	40	40	47.6	47.6	47.6	123.8	1134	46	46	47	48	0	232170000	49633000	39747000	96670000	46120000	56964000	46860000	103860000	74749000	4
419	835;1002;1281;1300;1609;1642;3239			IPI00328156;IPI00922603;IPI00008483	IPI00328156;IPI00922603	IPI00328156	7;5;1	7;5;1	7;5;1	Amine oxidase [flavin-containing] B;Monoamine oxidase type B;cDNA FLJ51821, highly similar to Amine oxidase (flavin-containing) B (EC 1.4.3.4);Monoamine oxidase B;cDNA FLJ52418, highly similar to Amine oxidase (flavin-containing) B (EC 1.4.3.4)	MAOB	Amine oxidase [flavin-containing] B;cDNA FLJ52418, highly similar to Amine oxidase (flavin-containing) B	P27338;B7Z242;Q8TBI1;B7Z5H3	3	7	7	7	6	7	6	7	6	7	6	7	6	7	6	7	22.3	22.3	22.3	58.762	520	6	7	6	7	4.4e-46	5162500	1891500	1134300	1456200	680610	2934700	1228200	1491200	661480	4
420	155;341;707;908;1005;1181;1874;1875;2555;2567			IPI00328415;IPI00871319;IPI00446235;IPI00879792;IPI00879692	IPI00328415;IPI00871319;IPI00446235;IPI00879792	IPI00328415	10;10;10;5;1	10;10;10;5;1	10;10;10;5;1	Diaphorase-1;NADH-cytochrome b5 reductase 3;NADH-cytochrome b5 reductase 3 membrane-bound form;NADH-cytochrome b5 reductase 3 soluble form;cDNA FLJ56301, highly similar to NADH-cytochrome b5 reductase (EC 1.6.2.2);Mutant NADH-cytochrome b5 reductase;cDNA FLJ42537 fis, clone BRACE3004058, highly similar to NADH-cytochrome B5 reductase (EC 1.6.2.2);Cytochrome b5 reductase 3	CYB5R3;DIA1;Z93241.1-006	cDNA FLJ56301, highly similar to NADH-cytochrome b5 reductase;34 kDa protein;Isoform 2 of NADH-cytochrome b5 reductase 3;Cytochrome b5 reductase 3	P00387-1;P00387;B7Z7L3;P00387-2;Q6TGM4;Q6TGM5;Q6ZVI6;B1AHF3	5	10	10	10	10	10	10	10	10	10	10	10	10	10	10	10	38.9	38.9	38.9	38.226	334	12	12	12	11	3.27e-134	37323000	16511000	10931000	6091000	3789600	23263000	14523000	4408000	4222600	4
422	673;1032;1608;1705;1849;2410;2744			IPI00328867;IPI00641230	IPI00328867;IPI00641230	IPI00328867	7;7	6;6	5;5	pp60c-src;Proto-oncogene c-Src;Proto-oncogene tyrosine-protein kinase Src;Tyrosine kinase pp60c-src;cDNA FLJ14219 fis, clone NT2RP3003800, highly similar to Rattus norvegicus tyrosine protein kinase pp60-c-src mRNA	SRC;SRC1	Isoform 2 of Proto-oncogene tyrosine-protein kinase Src;Isoform 1 of Proto-oncogene tyrosine-protein kinase Src	P12931-2;P12931;P12931-1;Q71UK5;Q9H7V3	2	7	6	5	6	7	6	6	5	6	5	5	4	5	4	4	18.3	16.8	14.9	60.588	542	7	7	6	6	5.26e-40	2392200	413350	605000	879180	494700	521300	651460	1003000	785590	4
408	23;34;37;38;45;66;67;72;149;190;258;262;272;273;276;279;356;358;359;461;498;504;511;528;558;623;700;738;778;779;840;859;860;870;950;979;1011;1051;1147;1173;1301;1534;1599;1600;1641;1704;1774;1813;1855;1884;2020;2024;2139;2145;2257;2258;2311;2331;2353;2383;2386;2515;2516;2644;2658;2659;2662;2776;2814;2818;2832;2844;2870;2877;2963;3003;3009;3025;3043;3046;3096;3134;3162;3164;3165;3212;3229;3233	49	229	IPI00333541;IPI00302592;IPI00644576;IPI00553169;IPI00910863;IPI00927825;IPI00552416;IPI00552858;IPI00657767;IPI00900293;IPI00289334;IPI00477536;IPI00943563;IPI00953109;IPI00382697;IPI00382698;IPI00382699;IPI00178352;IPI00413958;IPI00937774;IPI00893150	IPI00333541;IPI00302592;IPI00644576;IPI00553169	IPI00333541	88;88;87;75;24;21;14;13;9;6;6;6;6;6;6;6;6;5;5;1;1	88;88;87;75;24;21;14;13;9;6;6;6;6;6;6;6;6;5;5;1;1	88;88;87;75;24;21;14;13;9;6;6;6;6;6;6;6;6;5;5;1;1	Actin-binding protein 280;Alpha-filamin;Endothelial actin-binding protein;Filamin-1;Filamin-A;Non-muscle filamin;Filamin A;FLNA protein;FLJ00119 protein;Filamin A, alpha (Actin binding protein 280);Putative uncharacterized protein FLNA;cDNA FLJ57038, highly similar to Filamin-A;Similar to filamin C, gamma (Actin binding protein 280)	FLN;FLN1;FLNA;FLJ00119;XX-FW83128A1.1-010	Isoform 1 of Filamin-A;Isoform 2 of Filamin-A;Filamin A, alpha;Putative uncharacterized protein FLNA	P21333-1;P21333;Q5HY55;Q60FE5;P21333-2;Q5HY53;Q60FE6;Q6NXF2;Q8TES4;Q5HY54;Q96C61;A6NDY9;B2ZZ80;B4E2F9;Q86TQ3	21	88	88	88	86	86	86	87	86	86	86	87	86	86	86	87	47.9	47.9	47.9	280.74	2647	132	132	127	130	0	1179000000	374330000	299970000	328200000	176480000	487480000	393580000	320900000	253470000	4
339	1640			IPI00333753;IPI00218658;IPI00218662;IPI00925443;IPI00218661;IPI00218664;IPI00218659;IPI00939846;IPI00218660;IPI00922622	IPI00333753;IPI00218658;IPI00218662;IPI00925443;IPI00218661;IPI00218664;IPI00218659;IPI00939846;IPI00218660;IPI00922622	IPI00333753	1;1;1;1;1;1;1;1;1;1	1;1;1;1;1;1;1;1;1;1	1;1;1;1;1;1;1;1;1;1	Inositol 1,4,5-trisphosphate receptor type 1;IP3 receptor isoform 1;Type 1 inositol 1,4,5-trisphosphate receptor;Inositol 1,4,5-trisphosphate receptor type 1 variant;cDNA FLJ51757, highly similar to Inositol 1,4,5-trisphosphate receptor type 1;cDNA FLJ54348, highly similar to Inositol 1,4,5-trisphosphate receptor type 1;cDNA FLJ50742, highly similar to Inositol 1,4,5-trisphosphate receptor type 1…	INSP3R1;ITPR1	Isoform 1 of Inositol 1,4,5-trisphosphate receptor type 1;Isoform 2 of Inositol 1,4,5-trisphosphate receptor type 1;Isoform 6 of Inositol 1,4,5-trisphosphate receptor type 1;Isoform 7 of Inositol 1,4,5-trisphosphate receptor type 1;Isoform 5 of Inositol 1,	Q14643-1;Q14643;Q14643-2;Q14643-6;Q14643-7;Q14643-5;Q59H91;Q14643-8;Q14643-3;B4DER3;Q14643-4;B4DGH1;B4DJU3;B7ZMI3	10	1	1	1	1	1	0	0	1	1	0	0	1	1	0	0	0.7	0.7	0.7	313.94	2758	1	1			0.017714	188080	119150	68938	0	0	0	90139	0	0	1
98	2774;2840			IPI00339269;IPI00011134	IPI00339269;IPI00011134	IPI00339269	2;2	1;1	1;1	Heat shock 70 kDa protein 6;Heat shock 70 kDa protein B';cDNA, FLJ93166, highly similar to Homo sapiens heat shock 70kDa protein 6 (HSP70B') (HSPA6), mRNA;cDNA FLJ36606 fis, clone TRACH2015654, highly similar to HEAT SHOCK 70 kDa PROTEIN 6;cDNA FLJ51847, highly similar to Heat shock 70 kDa protein 6;Heat shock 70kDa protein 6 (HSP70B') variant;Heat shock 70 kDa protein B;Putative heat shock 70 kD…	HSP70B';HSPA6;HSP70B;HSPA7	Heat shock 70 kDa protein 6;Putative heat shock 70 kDa protein 7	P17066;B2R6X5;B3KSM6;B4DHP5;Q53FC7;P48741	2	2	1	1	2	2	2	2	1	1	1	1	1	1	1	1	3.7	1.7	1.7	71.027	643	1	1	1	1	1.51e-16	3365500	790770	685940	1230300	658540	928920	852530	1299300	1056000	4
430	579;1028;1226;1372;1504;3074			IPI00339384;IPI00339385;IPI00910248	IPI00339384;IPI00339385;IPI00910248	IPI00339384	6;5;3	6;5;3	6;5;3	Androgen-regulated short-chain dehydrogenase/reductase 1;HCV core-binding protein HCBP12;Prostate short-chain dehydrogenase/reductase 1;Retinal reductase 1;Retinol dehydrogenase 11;cDNA FLJ32633 fis, clone SYNOV2000171, highly similar to Retinol dehydrogenase 11 (EC 1.1.1.-);Retinol dehydrogenase 11 (All-trans and 9-cis), isoform CRA_a;cDNA FLJ53708, highly similar to Retinol dehydrogenase 11 (EC…	ARSDR1;CGI-82;PSDR1;RDH11;hCG_21906	Isoform 1 of Retinol dehydrogenase 11;Isoform 2 of Retinol dehydrogenase 11;cDNA FLJ53708, highly similar to Retinol dehydrogenase 11	Q8TC12-1;Q8TC12;B3KQ19;Q0QD40;Q8TC12-2;A8K062;B4DDW0	3	6	6	6	6	6	6	6	6	6	6	6	6	6	6	6	25.8	25.8	25.8	35.386	318	6	6	6	6	3e-52	7476900	3134800	2607100	1100500	634430	4359100	3944500	544430	467920	4
301	2160			IPI00374657;IPI00170692;IPI00640416	IPI00374657;IPI00170692;IPI00640416	IPI00374657	1;1;1	1;1;1	1;1;1	33 kDa VAMP-associated protein;Vesicle-associated membrane protein-associated protein A;cDNA FLJ78586, highly similar to Homo sapiens VAMP (vesicle-associated membrane protein)-associated protein A, 33kDa (VAPA), mRNA;cDNA, FLJ96653, Homo sapiens VAMP (vesicle-associated membrane protein)-associated protein A, 33kDa (VAPA), mRNA	VAP33;VAPA	vesicle-associated membrane protein-associated protein A isoform 1;Vesicle-associated membrane protein-associated protein A;19 kDa protein	A6NDZ0;Q9P0L0;A8KA83	3	1	1	1	1	1	1	1	1	1	1	1	1	1	1	1	4.1	4.1	4.1	32.613	294	1	1	1	1	0.0011509	361160	138110	146480	51806	24769	176020	211200	36947	25830	4
323	1202;2560			IPI00374740;IPI00216516;IPI00942115;IPI00872082;IPI00216514	IPI00374740;IPI00216516;IPI00942115;IPI00872082;IPI00216514	IPI00374740	2;2;2;2;2	2;2;2;2;2	2;2;2;2;2	Antigenic surface determinant protein OA3;Integrin-associated protein;Leukocyte surface antigen CD47;Protein MER6;Integrin-associated protein CD47;Putative uncharacterized protein CD47	CD47;MER6	Isoform OA3-323 of Leukocyte surface antigen CD47;CD47 antigen isoform 3 precursor;Putative uncharacterized protein CD47;Isoform OA3-305 of Leukocyte surface antigen CD47;Isoform OA3-293 of Leukocyte surface antigen CD47	Q08722-1;Q08722;Q08722-4;Q71A41;C9JWA1;Q08722-3;Q08722-2	5	2	2	2	2	2	1	1	2	2	1	1	2	2	1	1	5.9	5.9	5.9	35.213	323	2	2	1	1	0.00020709	3452800	1551300	1082900	529970	288650	2114000	1452300	391750	325860	4
104	2034;2639;2951			IPI00375531;IPI00012048;IPI00604590;IPI00795292;IPI00026260;IPI00791971;IPI00029091;IPI00790856;IPI00790982;IPI00797082;IPI00794728	IPI00375531;IPI00012048;IPI00604590;IPI00795292;IPI00026260;IPI00791971	IPI00375531	3;3;2;2;2;2;1;1;1;1;1	3;3;2;2;2;2;1;1;1;1;1	3;3;2;2;2;2;1;1;1;1;1	Granzyme A-activated DNase;Metastasis inhibition factor nm23;nm23-H1;Nucleoside diphosphate kinase A;Tumor metastatic process-associated protein;Nucleoside diphosphate kinase;C-myc purine-binding transcription factor PUF;nm23-H2;Nucleoside diphosphate kinase B	NDPKA;NM23;NME1;hCG_2001850;NME1-NME2;NM23B;NME2	Isoform 2 of Nucleoside diphosphate kinase A;Isoform 1 of Nucleoside diphosphate kinase A;Nucleoside diphosphate kinase;Isoform 3 of Nucleoside diphosphate kinase B;Isoform 1 of Nucleoside diphosphate kinase B;9 kDa protein	P15531-2;P15531;P15531-1;Q32Q12;P22392-2;P22392;P22392-1;Q6FHN3	11	3	3	3	3	3	3	3	3	3	3	3	3	3	3	3	24.3	24.3	24.3	19.653	177	3	3	3	3	9.73e-05	2469100	335250	314000	1245400	574480	280040	282850	1420200	997070	4
331	400			IPI00376119;IPI00645788;IPI00738231;IPI00737155;IPI00396630;IPI00395654;IPI00217960;IPI00739595;IPI00739094;IPI00877619;IPI00514131;IPI00414365;IPI00889699;IPI00922246;IPI00643790;IPI00644248;IPI00889718;IPI00889577;IPI00940146	IPI00376119;IPI00645788;IPI00738231;IPI00737155;IPI00396630;IPI00395654;IPI00217960;IPI00739595;IPI00739094;IPI00877619;IPI00514131;IPI00414365;IPI00889699;IPI00922246;IPI00643790;IPI00644248;IPI00889718;IPI00889577;IPI00940146	IPI00376119	1;1;1;1;1;1;1;1;1;1;1;1;1;1;1;1;1;1;1	1;1;1;1;1;1;1;1;1;1;1;1;1;1;1;1;1;1;1	1;1;1;1;1;1;1;1;1;1;1;1;1;1;1;1;1;1;1	cAMP-dependent protein kinase catalytic subunit beta;cDNA FLJ54730, highly similar to cAMP-dependent protein kinase, beta-2-catalytic subunit (EC 2.7.11.11);Protein kinase, cAMP-dependent, catalytic, beta;cDNA FLJ52554, highly similar to cAMP-dependent protein kinase, beta-catalytic subunit (EC 2.7.11.11);cAMP-dependent protein kinase catalytic subunit alpha;cDNA FLJ77368, highly similar to Homo …	PRKACB;RP11-82H13.1-003;RP11-82H13.1-012;PKACA;PRKACA;hCG_23660;KIN27;RP11-82H13.1-005;RP11-82H13.1-008;RP11-82H13.1-010;RP11-82H13.1-011;RP11-82H13.1-013;RP11-82H13.1-009;RP11-82H13.1-007	Isoform 2 of cAMP-dependent protein kinase catalytic subunit beta;cDNA FLJ52554, highly similar to cAMP-dependent protein kinase, beta-catalytic subunit;Isoform 7 of cAMP-dependent protein kinase catalytic subunit beta;Isoform 5 of cAMP-dependent protein k	P22694-2;P22694;B4E2L0;P22694-6;B1APG3;B4DKB0;P22694-7;B1APG2;P22694-5;P17612-1;P17612;A8K8B9;P22694-1;B2RB89;P17612-2;Q15136;P22694-3;P22694-4;B1APG4;C9JK39;A6NJF4;B7ZA00;P22694-8;B1APF9;B7Z708;B1APF8;B1APG0;B1APG1;B1APF7;B1APF6	19	1	1	1	0	1	0	0	0	1	0	0	0	1	0	0	5.5	5.5	5.5	46.235	398		1			1.86e-29	87685	0	87685	0	0	0	114650	0	0	1
435	523;596;1110;1112;2070;2495			IPI00382470;IPI00784295;IPI00604607;IPI00555614;IPI00555565;IPI00031523;IPI00555876;IPI00910046	IPI00382470;IPI00784295;IPI00604607	IPI00382470	6;6;4;1;1;1;1;1	6;6;4;1;1;1;1;1	4;4;3;0;0;1;1;1	Heat shock 86 kDa;Heat shock protein HSP 90-alpha;Renal carcinoma antigen NY-REN-38;Full-length cDNA 5-PRIME end of clone CS0DN005YI08 of Adult brain of Homo sapiens (human);HSP90AA1 protein;Full-length cDNA clone CS0CAP007YF18 of Thymus of Homo sapiens (human);Hsp89-alpha-delta-N	HSP90A;HSP90AA1;HSPC1;HSPCA	Isoform 2 of Heat shock protein HSP 90-alpha;Isoform 1 of Heat shock protein HSP 90-alpha;Hsp89-alpha-delta-N	P07900-2;P07900;Q86SX1;P07900-1;Q2VPJ6;Q86U12;Q8TBA7;O75322;Q96HX7	8	6	6	4	5	4	5	5	5	4	5	5	3	2	3	3	8.5	8.5	5.9	98.16	854	5	4	5	5	3.03e-32	5271300	1037100	699200	2398600	1136400	1046100	1023000	2298400	2017100	4
102	374;3223			IPI00383581;IPI00011454;IPI00441414	IPI00383581;IPI00011454;IPI00441414	IPI00383581	2;2;2	2;2;2	2;2;2	Alpha-glucosidase 2;Glucosidase II subunit alpha;Neutral alpha-glucosidase AB;cDNA FLJ54035, highly similar to Neutral alpha-glucosidase AB;cDNA FLJ61290, highly similar to Neutral alpha-glucosidase AB;cDNA FLJ54057, highly similar to Neutral alpha-glucosidase AB;cDNA FLJ59643, highly similar to Neutral alpha-glucosidase AB	G2AN;GANAB;KIAA0088	cDNA FLJ61290, highly similar to Neutral alpha-glucosidase AB;Isoform 2 of Neutral alpha-glucosidase AB;Isoform 3 of Neutral alpha-glucosidase AB	Q14697-1;Q14697;B4DIW2;B4DJ30;B4DSM6;Q14697-2;B4DZ53;Q14697-3	3	2	2	2	2	2	2	2	2	2	2	2	2	2	2	2	3.9	3.9	3.9	112.92	995	2	2	2	2	3.18e-05	423640	67550	65208	183090	107790	48684	51666	226700	195390	4
439	2082;2532;3033			IPI00383953;IPI00382540	IPI00383953	IPI00383953	3;1	1;1	1;1	VH4 heavy chain variable region	IGM	VH4 heavy chain variable region (Fragment)	O95973	2	3	1	1	2	3	2	3	0	1	1	1	0	1	1	1	11.3	4	4	16.315	150		1	1	1	7.21e-07	647090	0	361620	172200	113270	0	645900	87860	92415	3
442	7;964;2109;2468			IPI00384404;IPI00827892;IPI00940727;IPI00783184;IPI00954576;IPI00921238;IPI00829590;IPI00829841	IPI00384404;IPI00827892;IPI00940727;IPI00783184;IPI00954576	IPI00384404	4;2;2;2;2;1;1;1	2;0;0;0;0;0;0;0	2;0;0;0;0;0;0;0	Rheumatoid factor RF-ET9;VH87-2 protein;Putative uncharacterized protein ENSP00000406904;Immunglobulin heavy chain variable region	VH87-2	Rheumatoid factor RF-ET9 (Fragment);VH87-2 protein (Fragment);Putative uncharacterized protein ENSP00000406904;Immunglobulin heavy chain variable region (Fragment);hypothetical protein XP_002347524	A2J1N6;A2N2G5;C9J0C9;Q0ZCI0;Q0ZCJ6	8	4	2	2	1	1	4	1	0	0	2	0	0	0	2	0	28.7	13	13	12.626	115			2		2.11e-18	4131400	0	0	4131400	0	0	0	4131400	0	1
443	132;453;632;633;783;911;1006;1015;1016;1050;2772;3068	41	287	IPI00384938;IPI00423466;IPI00423463;IPI00784817;IPI00816314;IPI00785084;IPI00448925;IPI00423464;IPI00892671;IPI00844239;IPI00442911;IPI00383732	IPI00384938;IPI00423466;IPI00423463;IPI00784817;IPI00816314;IPI00785084;IPI00448925;IPI00423464;IPI00892671	IPI00384938	12;11;11;11;11;11;11;10;9;2;1;1	1;0;0;0;0;0;0;0;0;1;0;0	1;0;0;0;0;0;0;0;0;1;0;0	Putative uncharacterized protein DKFZp686N02209;Putative uncharacterized protein DKFZp686H20196;Putative uncharacterized protein DKFZp686O01196;Anti-RhD monoclonal T125 gamma1 heavy chain;Putative uncharacterized protein DKFZp686I15196;Ig gamma-1 chain C region;IGH@ protein;Hepatitis B virus receptor binding protein;Putative uncharacterized protein DKFZp686K03196	DKFZp686N02209;DKFZp686H20196;DKFZp686O01196;DKFZp686I15196;IGHG1;IGH@;DKFZp686K03196	Putative uncharacterized protein DKFZp686N02209;Putative uncharacterized protein DKFZp686H20196;Putative uncharacterized protein DKFZp686O01196;Anti-RhD monoclonal T125 gamma1 heavy chain;Putative uncharacterized protein DKFZp686I15196;IGH@ protein;Putativ	Q7Z351;Q6N097;Q6N094;Q5EFE5;Q6N096;P01857;Q6GMX6;Q6PYX1;C9J8G9;Q6N095;A6NNZ4	12	12	1	1	10	9	11	9	1	1	1	1	1	1	1	1	26.6	2.5	2.5	52.851	482	1	1	1	1	3.66e-88	17235000	272280	515600	15296000	1151300	100530	261280	16781000	997280	4
437	121			IPI00385557;IPI00382534	IPI00385557;IPI00382534	IPI00385557	1;1	1;1	1;1	Ig heavy chain V-II region SESS;Ig heavy chain V-II region OU		Ig heavy chain V-II region SESS;Ig heavy chain V-II region OU	P04438;P01814	2	1	1	1	0	1	1	1	0	1	1	1	0	1	1	1	4.8	4.8	4.8	16.323	147		1	1	1	0.0092	1361800	0	46137	1115400	200260	0	9671	1435000	51339	3
446	816;1811;2014;2157			IPI00386839;IPI00386137;IPI00386136	IPI00386839;IPI00386137	IPI00386839	4;2;1	3;2;1	2;1;0	Amyloid lambda 6 light chain variable region SAR;Ig lambda chain V-VI region EB4		Amyloid lambda 6 light chain variable region SAR (Fragment);Ig lambda chain V-VI region EB4	Q96JD0;P06319	3	4	3	2	3	1	4	3	2	0	3	2	1	0	2	1	56.9	50	32.8	12.294	116	2		4	2	9.37e-75	30789000	300820	0	30311000	177120	111880	0	30792000	53853	3
447	282;2097;2198;2738;3109;3204			IPI00386879;IPI00423462;IPI00426060;IPI00423460;IPI00386524;IPI00647704;IPI00449920;IPI00644497;IPI00383164;IPI00829711	IPI00386879;IPI00423462;IPI00426060;IPI00423460;IPI00386524;IPI00647704;IPI00449920;IPI00644497;IPI00383164	IPI00386879	6;5;5;5;5;5;5;5;4;2	5;5;5;5;5;5;5;5;4;2	2;2;2;2;2;2;2;2;1;0	cDNA FLJ14473 fis, clone MAMMA1001080, highly similar to Homo sapiens SNC73 protein (SNC73) mRNA;Putative uncharacterized protein DKFZp686K18196;Putative uncharacterized protein DKFZp686J11235;Putative uncharacterized protein DKFZp686G21220;CDNA FLJ25298 fis, clone STM07683, highly similar to Protein Tro alpha1 H,myeloma;cDNA FLJ41552 fis, clone COLON2004478, highly similar to Protein Tro alpha1 …	DKFZp686K18196;DKFZp686J11235;DKFZp686G21220;IGHA1;SNC73	cDNA FLJ14473 fis, clone MAMMA1001080, highly similar to Homo sapiens SNC73 protein (SNC73) mRNA;Putative uncharacterized protein DKFZp686K18196 (Fragment);Putative uncharacterized protein DKFZp686J11235 (Fragment);Putative uncharacterized protein DKFZp686	Q96K68;Q6N092;Q6MZW0;Q6N090;Q96DK0;Q6ZW64;P01876;Q8NCL6;Q9UP60;C9JAM6;Q8WY24	10	6	5	2	6	6	6	6	5	5	5	5	2	2	2	2	14	11.7	4.9	53.088	494	5	6	6	5	2.23e-98	206170000	9491400	15148000	143790000	37741000	5308900	10982000	165420000	53717000	4
451	1207			IPI00394968;IPI00929204	IPI00394968;IPI00929204	IPI00394968	1;1	1;1	1;1	SH3 domain and tetratricopeptide repeats-containing protein 2;cDNA FLJ45107 fis, clone BRAWH3033448, highly similar to SH3 domain and tetratricopeptiderepeats-containing protein 2;cDNA FLJ45308 fis, clone BRHIP3004710, highly similar to SH3 domain and tetratricopeptiderepeats-containing protein 2;cDNA FLJ46341 fis, clone TESTI4046873, highly similar to SH3 domain and tetratricopeptide repeats-con…	KIAA1985;PP12494;SH3TC2	Isoform 1 of SH3 domain and tetratricopeptide repeats-containing protein 2;Similar to 5-hydroxytryptamine receptor 4	Q8TF17-1;Q8TF17;B3KXB9;B3KXF0;B3KXY8;Q14CC0	2	1	1	1	1	1	0	1	1	1	0	1	1	1	0	1	0.8	0.8	0.8	144.77	1288	1	1		1	0.035856	1765700	302990	405970	0	1056700	0	0	0	1689900	1
295	694			IPI00394992;IPI00163207	IPI00394992;IPI00163207	IPI00394992	1;1	1;1	1;1	N-acetylmuramoyl-L-alanine amidase;Peptidoglycan recognition protein 2;Peptidoglycan recognition protein long;cDNA FLJ75376, highly similar to Homo sapiens peptidoglycan recognition protein L (PGLYRP) mRNA	PGLYRP2;PGLYRPL;PGRPL;UNQ3103/PRO10102	Isoform 2 of N-acetylmuramoyl-L-alanine amidase;Isoform 1 of N-acetylmuramoyl-L-alanine amidase	Q96PD5-2;Q96PD5;B2RMZ2;B7ZM33;Q96PD5-1;A8K050	2	1	1	1	1	1	1	1	1	1	1	1	1	1	1	1	4.6	4.6	4.6	68	634	1	1	1	1	6.75e-10	195910	25072	47025	36801	87015	16664	58140	20221	172740	4
453	1668;2834			IPI00395887;IPI00908319	IPI00395887;IPI00908319	IPI00395887	2;1	2;1	2;1	Thioredoxin domain-containing protein 1;Thioredoxin-related transmembrane protein 1;Transmembrane Trx-related protein;cDNA FLJ51569, highly similar to Thioredoxin domain-containing protein 1;cDNA FLJ51570, highly similar to Thioredoxin domain-containing protein 1;Thioredoxin domain containing, isoform CRA_b	PSEC0085;TMX;TMX1;TXNDC;TXNDC1;UNQ235/PRO268;hCG_2042974	Thioredoxin-related transmembrane protein 1;Thioredoxin domain containing, isoform CRA_b	Q9H3N1;B7Z7R5;B4DZX7	2	2	2	2	2	2	2	2	2	2	2	2	2	2	2	2	7.9	7.9	7.9	31.791	280	2	2	2	2	1.04e-09	1082200	487070	379950	122520	92698	699340	533300	56064	68032	4
327	56;585;663;755;883;1125;1184;1251;1408;1467;1540;1556;1674;1707;1780;1807;2224;2302;2365;2520;2610;2656;2721;2864;3060;3166;3249	42	461	IPI00397834;IPI00216699	IPI00397834;IPI00216699	IPI00397834	27;27	27;27	27;27	Fermitin family homolog 3;Kindlin-3;MIG2-like protein;Unc-112-related protein 2	FERMT3;KIND3;MIG2B;URP2	Isoform 1 of Fermitin family homolog 3;Isoform 2 of Fermitin family homolog 3	Q86UX7-1;Q86UX7;Q86UX7-2	2	27	27	27	26	27	26	27	26	27	26	27	26	27	26	27	56.2	56.2	56.2	75.952	667	30	31	30	31	1.8e-256	111310000	16037000	20859000	45930000	28489000	16655000	24199000	49855000	47452000	4
373	209;578;588;631;776;1188;1189;1554;1555;2268;2359;2703;2704;3041			IPI00400826;IPI00291262;IPI00795633;IPI00793848	IPI00400826;IPI00291262;IPI00795633;IPI00793848	IPI00400826	14;14;14;10	14;14;14;10	14;14;14;10	Aging-associated gene 4 protein;ApoJalpha;ApoJbeta;Apolipoprotein J;Clusterin;Clusterin alpha chain;Clusterin beta chain;Complement cytolysis inhibitor;Complement cytolysis inhibitor a chain;Complement cytolysis inhibitor b chain;Complement-associated protein SP-40,40;Ku70-binding protein 1;NA1/NA2;Testosterone-repressed prostate message 2;cDNA FLJ36080 fis, clone TESTI2019872, highly similar to …	APOJ;CLI;CLU;KUB1;AAG4	Isoform 2 of Clusterin;Isoform 1 of Clusterin;CLU;54 kDa protein	P10909-2;P10909;P10909-1;B3KSE6;B4DW11;Q6LDQ3;Q8IWL5;Q8IWM0	4	14	14	14	14	14	14	14	14	14	14	14	14	14	14	14	28.1	28.1	28.1	57.832	501	18	18	19	18	4.92e-145	281880000	81029000	89821000	58047000	52978000	100250000	125930000	51023000	81029000	4
455	513;767;2165;2613;2933			IPI00410297;IPI00884403;IPI00944522	IPI00410297;IPI00884403;IPI00944522	IPI00410297	5;5;4	5;5;4	5;5;4	Endo-glucoronidase;Heparanase;Heparanase 50 kDa subunit;Heparanase 8 kDa subunit;Heparanase-1;cDNA PSEC0090 fis, clone PLACE1001300, highly similar to Heparanase (EC 3.2.-.-);Heparanase exon10-deletion variant;Heparanase exon 9&10 deletion variant	HEP;HPA;HPA1;HPR1;HPSE;HPSE1;HSE1	Heparanase;Heparanase;heparanase isoform 2 precursor	Q9Y251;B3KQR6;C7F7I4;A9JIG7;C7F7I3	3	5	5	5	5	5	5	5	5	5	5	5	5	5	5	5	11.4	11.4	11.4	61.176	543	5	6	5	5	6.33e-21	2417200	502270	516010	969800	429090	520350	622320	1110300	685290	4
456	3014			IPI00410333;IPI00795384	IPI00410333;IPI00795384	IPI00410333	1;1	1;1	1;1	Trem-like transcript 1 protein;Triggering receptor expressed on myeloid cells-like protein 1	TLT1;TREML1;UNQ1825/PRO3438	Isoform 1 of Trem-like transcript 1 protein;Isoform 2 of Trem-like transcript 1 protein	Q86YW5-1;Q86YW5;Q86YW5-2	2	1	1	1	1	1	0	1	1	1	0	1	1	1	0	1	5.1	5.1	5.1	32.678	311	1	1		1	0.097158	2284300	1261200	710910	0	312210	2083200	566800	0	304440	3
457	759;1477;1750;1914;2796;2803;2828;2865	1	33	IPI00410714;IPI00853068;IPI00217473	IPI00410714;IPI00853068	IPI00410714	8;7;2	8;7;2	4;3;0	Alpha-globin;Hemoglobin alpha chain;Hemoglobin subunit alpha;Hemoglobin alpha-2 globin mutant;HBA2;Truncated alpha 1 globin variant;Alpha-2 globin;Hemoglobin alpha 2;Hemoglobin alpha 1 globin chain;Alpha-1 thalassemia globin gene.;Alpha-globin gene (alpha-thalassemia allelic form);Hemoglobin alpha 1;Hemoglobin alpha-1 chain;Hemoglobin alpha-2;Alpha-1 globin;Alpha one globin	HBA1;HBA2	Hemoglobin subunit alpha;Hemoglobin alpha-2	P69905;Q4ZGM8;Q7Z6G4;Q7Z7B4;Q86YQ5;Q96T46;Q9BX83;P78461;Q6J1Z9;Q86YL2;Q86YQ1;Q86YQ4;Q9NQT3	3	8	8	4	8	8	7	8	8	8	7	8	4	4	4	4	64.1	64.1	40.1	15.257	142	53	34	16	16	4.21e-87	505770000	180730000	145000000	102480000	77559000	221770000	199380000	85659000	127900000	4
459	1167			IPI00413451;IPI00749398	IPI00413451;IPI00749398	IPI00413451	1;1	1;1	1;1	Cytoplasmic antiproteinase;Peptidase inhibitor 6;Placental thrombin inhibitor;Serpin B6;MSTP057	PI6;PTI;SERPINB6	Putative uncharacterized protein DKFZp686I04222;Serpin B6	B2RBA8;Q59F97;Q7Z2Y7;P35237;Q8IXH2;Q9UDI7	2	1	1	1	1	1	1	0	1	1	1	0	1	1	1	0	3.7	3.7	3.7	46.37	409	1	1	1		0.060178	170720	22642	38006	110070	0	0	0	110070	0	1
461	2742			IPI00414320;IPI00909703	IPI00414320;IPI00909703	IPI00414320	1;1	1;1	1;1	56 kDa autoantigen;Annexin A11;Annexin XI;Annexin-11;Calcyclin-associated annexin 50;cDNA FLJ58379, highly similar to Annexin A11;cDNA FLJ55482, highly similar to Annexin A11;Annexin A11 variant;Annexin A11, isoform CRA_b;cDNA FLJ31545 fis, clone NT2RI2000932, highly similar to Annexin A11;cDNA FLJ44306 fis, clone TRACH2025084, highly similar to Annexin A11;ANXA11 protein;cDNA FLJ51518, highly si…	ANX11;ANXA11;hCG_22492;RP11-369J21.10-001	cDNA FLJ55482, highly similar to Annexin A11;cDNA FLJ51518, highly similar to Annexin A11	P50995;B4DVE7;B7Z6L0;Q59EP1;Q5T0G8;Q6ICS0;B4DPJ2	2	1	1	1	1	1	0	0	1	1	0	0	1	1	0	0	1.8	1.8	1.8	65.596	605	1	1			0.033788	115940	75381	40563	0	0	0	53039	0	0	1
463	559;607;837;940;1471;1733;2299;2352;2466;2542;2799;2807			IPI00418495;IPI00927926;IPI00924451;IPI00927703;IPI00926723;IPI00924653;IPI00925268	IPI00418495	IPI00418495	12;4;3;2;2;2;2	12;4;3;2;2;2;2	12;4;3;2;2;2;2	Fatty acid translocase;Glycoprotein IIIb;Leukocyte differentiation antigen CD36;PAS IV;PAS-4;Platelet collagen receptor;Platelet glycoprotein 4;Platelet glycoprotein IV;Thrombospondin receptor;CD36 antigen (Collagen type I receptor, thrombospondin receptor);CD36 antigen (Collagen type I receptor, thrombospondin receptor), isoform CRA_a;cDNA, FLJ93369, highly similar to Homo sapiens CD36 antigen (…	CD36;GP3B;GP4;hCG_17062;tcag7.257	Platelet glycoprotein 4	P16671;A4D1B1;B3KUB8;B7Z6C3;Q9BQA7;Q9BZM7;Q9BZM9;Q9BZN0;Q9BZN1;Q9BZN2	7	12	12	12	12	12	11	12	12	12	11	12	12	12	11	12	26.3	26.3	26.3	53.053	472	14	14	14	14	1.34e-156	71173000	37360000	18546000	8561600	6705300	52943000	22020000	5886900	7875700	4
465	2547	54	1364	IPI00419215;IPI00550964	IPI00419215;IPI00550964	IPI00419215	1;1	1;1	1;1	Alpha-2-macroglobulin-like protein 1;C3 and PZP-like alpha-2-macroglobulin domain-containing protein 9;cDNA FLJ41607 fis, clone CTONG3001370, highly similar to Homo sapiens alpha-2-macroglobulin-like 1 (A2ML1), mRNA;Putative uncharacterized protein A2ML1;cDNA FLJ57810, highly similar to Homo sapiens alpha-2-macroglobulin-like 1 (A2ML1), mRNA;cDNA FLJ16045 fis, clone CTONG2000042, weakly similar t…	A2ML1;CPAMD9	Alpha-2-macroglobulin-like protein 1;18 kDa protein	A8K2U0;B3KVV6;B5MDD1;B7Z7V4;Q6ZWK7	2	1	1	1	0	1	1	1	0	1	1	1	0	1	1	1	0.8	0.8	0.8	161.1	1454		1	1	1	0.18085	2139900	0	492600	1258600	388710	0	539440	1473400	511440	3
466	555;724;2635;2961;3007			IPI00419585;IPI00910407;IPI00925747;IPI00925411;IPI00939576;IPI00787316;IPI00938023;IPI00937169;IPI00886744;IPI00657716;IPI00030144;IPI00455871;IPI00743690;IPI00479480;IPI00938414;IPI00935692;IPI00879182	IPI00419585;IPI00910407;IPI00925747;IPI00925411;IPI00939576	IPI00419585	5;4;3;3;3;2;1;1;1;1;1;1;1;1;1;1;1	5;4;3;3;3;2;1;1;1;1;1;1;1;1;1;1;1	5;4;3;3;3;2;1;1;1;1;1;1;1;1;1;1;1	Cyclophilin A;Cyclosporin A-binding protein;Peptidyl-prolyl cis-trans isomerase A;Rotamase A;Peptidyl-prolyl cis-trans isomerase;cDNA FLJ75025, highly similar to Homo sapiens peptidylprolyl isomerase A (cyclophilin A) (PPIA), transcript variant 2, mRNA;Peptidylprolyl isomerase A (Cyclophilin A)	CYPA;PPIA	Peptidyl-prolyl cis-trans isomerase A;cDNA FLJ53060, moderately similar to Peptidyl-prolyl cis-trans isomerase A;Putative uncharacterized protein PPIA;Putative uncharacterized protein PPIA;cDNA FLJ75025, highly similar to Homo sapiens peptidylprolyl isomer	P62937;A8K220;A8K486;B2RE56;Q71V99;B4DM82;C9J5S7;C9JQJ3;Q567Q0	17	5	5	5	5	5	5	5	5	5	5	5	5	5	5	5	32.7	32.7	32.7	18.012	165	7	7	7	7	6.44e-64	26535000	8341900	6435900	6540300	5216700	9966500	7519000	8405600	7497400	4
460	362			IPI00420084;IPI00413587;IPI00943215;IPI00472003	IPI00420084;IPI00413587;IPI00943215;IPI00472003	IPI00420084	1;1;1;1	1;1;1;1	1;1;1;1	BH3-interacting domain death agonist;BH3-interacting domain death agonist p11;BH3-interacting domain death agonist p13;BH3-interacting domain death agonist p15;p11 BID;p13 BID;p15 BID;p22 BID;cDNA FLJ37476 fis, clone BRAWH2012827, highly similar to Homo sapiens BH3 interacting domain death agonist (BID), transcript variant 1, mRNA;BH3 interacting domain death agonist, isoform CRA_d;BID isoform L(…	BID;hCG_21529	Isoform 2 of BH3-interacting domain death agonist;Isoform 1 of BH3-interacting domain death agonist;Putative uncharacterized protein BID;Isoform 4 of BH3-interacting domain death agonist	P55957-2;P55957;B3KT21;P55957-1;A8ASI8;B1PL87;C9JQ20;P55957-4;B2ZP79	4	1	1	1	1	0	1	1	1	0	1	1	1	0	1	1	6.2	6.2	6.2	26.836	241	1		1	1	0.01022	34620	4942.7	0	21568	8109.3	3667.8	0	25131	11716	3
467	453;632;634;911;973;1015;1017;2097;2771;3069	41;55	269;414	IPI00426051;IPI00399007;IPI00930072	IPI00426051;IPI00399007;IPI00930072	IPI00426051	10;9;8	3;3;2	1;1;0	Ig gamma-2 chain C region;Putative uncharacterized protein DKFZp686C15213;Putative uncharacterized protein DKFZp686I04196;Putative uncharacterized protein DKFZp686E23209	IGHG2;DKFZp686C15213;DKFZp686I04196;DKFZp686E23209	Putative uncharacterized protein DKFZp686C15213;Putative uncharacterized protein DKFZp686I04196 (Fragment);Putative uncharacterized protein DKFZp686E23209	P01859;Q6MZU6;Q6N093;Q68CN4	3	10	3	1	10	9	9	9	3	3	3	3	1	1	1	1	21.8	8.8	3.7	51.098	464	6	5	16	8	2.92e-99	488180000	11792000	21840000	424300000	30246000	5122800	14318000	470770000	25279000	4
161	867;1048;1118;2551;3065			IPI00429190;IPI00020436;IPI00941638;IPI00795676;IPI00930720;IPI00911020	IPI00429190;IPI00020436;IPI00941638;IPI00795676;IPI00930720	IPI00429190	5;5;5;5;5;2	5;5;5;5;5;2	5;5;5;5;5;2	cDNA FLJ61136, highly similar to Ras-related protein Rab-11A;GTP-binding protein YPT3;Ras-related protein Rab-11B;RAB11B protein;RAB11B, member RAS oncogene family;Ras-related protein Rab-11A;YL8;cDNA FLJ61134, highly similar to Ras-related protein Rab-11B;cDNA FLJ51542, highly similar to Ras-related protein Rab-11B	RAB11B;YPT3;RAB11;RAB11A	cDNA FLJ61136, highly similar to Ras-related protein Rab-11A;Ras-related protein Rab-11B;Ras-related protein Rab-11A;22 kDa protein;cDNA FLJ61134, highly similar to Ras-related protein Rab-11B	B4DMN1;Q15907;A5YM50;Q5U0I1;Q6FHR0;Q6FI42;P62491;B4DMK0;B4DT13	6	5	5	5	5	5	3	4	5	5	3	4	5	5	3	4	21.1	21.1	21.1	28.861	261	5	5	3	4	2.71e-10	3959100	1335500	1181400	901450	540750	1564600	1410600	1126900	824360	4
468	156;231;584;598;690;726;941;991;1091;1257;1542;1788;2215;2259;2367;2648;2657;2760;2942;3048			IPI00440493;IPI00908963;IPI00549805;IPI00471928;IPI00641249;REV__IPI00418142;REV__IPI00554504;REV__IPI00157365;REV__IPI00377271;REV__IPI00926941;REV__IPI00947113;REV__IPI00946457;REV__IPI00922580;REV__IPI00927295;REV__IPI00926503;REV__IPI00945546;REV__IPI00945879;REV__IPI00926375;REV__IPI00927951;REV__IPI00927666;REV__IPI00925092;REV__IPI00927907	IPI00440493;IPI00908963;IPI00549805	IPI00440493	20;17;10;9;7;1;1;1;1;1;1;1;1;1;1;1;1;1;1;1;1;1	20;17;10;9;7;1;1;1;1;1;1;1;1;1;1;1;1;1;1;1;1;1	20;17;10;9;7;1;1;1;1;1;1;1;1;1;1;1;1;1;1;1;1;1	ATP synthase subunit alpha, mitochondrial;ATP synthase subunit alpha	ATP5A;ATP5A1;ATP5AL2;ATPM	ATP synthase subunit alpha, mitochondrial;ATP synthase subunit alpha;23 kDa protein	P25705;A8K092;B4DY56	22	20	20	20	20	20	18	18	20	20	18	18	20	20	18	18	44.1	44.1	44.1	59.75	553	24	24	21	22	8.69e-227	44797000	18777000	15048000	6982500	3989200	24796000	20147000	6393200	4415200	4
351	309			IPI00440703;IPI00219673;IPI00917714;IPI00917331;IPI00917580	IPI00440703;IPI00219673;IPI00917714;IPI00917331;IPI00917580	IPI00440703	1;1;1;1;1	1;1;1;1;1	1;1;1;1;1	cDNA FLJ76598, highly similar to Homo sapiens glutathione S-transferase kappa 1, mRNA;Glutathione S-transferase kappa 1, isoform CRA_a;GSTK1 protein;Glutathione S-transferase kappa 1;Glutathione S-transferase subunit 13;GST 13-13;GST class-kappa;GSTK1-1;cDNA FLJ78056;Glutathione S-transferase kappa 1, isoform CRA_d;LOC51064 protein;cDNA FLJ60871, highly similar to Glutathione S-transferase kappa …	GSTK1;hCG_20682;HDCMD47P;LOC51064;tcag7.883	glutathione S-transferase kappa 1 isoform b;Glutathione S-transferase kappa 1;glutathione S-transferase kappa 1 isoform c;cDNA FLJ37944 fis, clone CTONG2008720, highly similar to Glutathione S-transferase kappa 1;Putative uncharacterized protein GSTK1	Q6P4H0;Q9Y2Q3;Q2NLC8;Q6FII1;B4DSY2;B3KTA6;C9JNT3	5	1	1	1	1	1	1	1	1	1	1	1	1	1	1	1	3.2	3.2	3.2	31.566	282	1	1	1	1	1.4e-05	415050	140530	119080	105990	49443	192220	143350	102400	72790	4
470	128			IPI00456635;IPI00940441;IPI00790059;IPI00456636	IPI00456635;IPI00940441;IPI00790059;IPI00456636	IPI00456635	1;1;1;1	1;1;1;1	1;1;1;1	Munc13-4;Protein unc-13 homolog D;cDNA FLJ54883, highly similar to Unc-13 homolog D	UNC13D	Isoform 3 of Protein unc-13 homolog D;Isoform 1 of Protein unc-13 homolog D;cDNA FLJ54883, highly similar to Unc-13 homolog D;Isoform 2 of Protein unc-13 homolog D	Q70J99-3;Q70J99;Q70J99-1;B4DTQ6;Q70J99-2	4	1	1	1	1	1	1	1	1	1	1	1	1	1	1	1	1.2	1.2	1.2	128.82	1142	1	1	1	1	0.00057862	844380	197780	190620	326170	129800	240110	246430	327360	208340	4
472	259;1664;1768;2604			IPI00464990;IPI00889679	IPI00464990;IPI00889679	IPI00464990	4;4	4;4	4;4	Antigen CD42b-beta;Platelet glycoprotein Ib beta chain	GP1BB	Isoform 2 of Platelet glycoprotein Ib beta chain;Isoform 1 of Platelet glycoprotein Ib beta chain	P13224-2;P13224;P13224-1	2	4	4	4	4	4	4	4	4	4	4	4	4	4	4	4	10	10	10	43.157	411	5	5	6	5	2.3e-33	67490000	31705000	20772000	9564100	5449100	45424000	26278000	6399000	5689700	4
473	587;734;1153;2275;3061			IPI00465028;IPI00797270;IPI00451401;IPI00796633	IPI00465028;IPI00797270;IPI00451401;IPI00796633	IPI00465028	5;5;4;4	5;5;4;4	5;5;4;4	Triosephosphate isomerase;Triose-phosphate isomerase	TPI;TPI1	triosephosphate isomerase 1 isoform 2;Isoform 1 of Triosephosphate isomerase;Isoform 2 of Triosephosphate isomerase;22 kDa protein	Q53HE2;P60174-1;P60174;B4DUI5;B7Z5D8;Q2QD09;P60174-2	4	5	5	5	4	4	5	5	4	4	5	5	4	4	5	5	27.6	27.6	27.6	30.791	286	4	4	5	5	3.45e-41	5161700	483800	631470	2454000	1592400	530870	637010	2559100	2684400	4
80	2646			IPI00465179;IPI00925520;IPI00009790;IPI00743142;IPI00332371;IPI00643196;IPI00219585;IPI00645848	IPI00465179;IPI00925520;IPI00009790;IPI00743142;IPI00332371;IPI00643196;IPI00219585;IPI00645848	IPI00465179	1;1;1;1;1;1;1;1	1;1;1;1;1;1;1;1	1;1;1;1;1;1;1;1	cDNA FLJ44241 fis, clone THYMU3008436, highly similar to 6-phosphofructokinase, muscle type (EC 2.7.1.11);6-phosphofructokinase, liver type;Phosphofructo-1-kinase isozyme B;Phosphofructokinase 1;Phosphohexokinase;6-phosphofructokinase type C;6-phosphofructokinase, platelet type;Phosphofructo-1-kinase isozyme C;6-phosphofructokinase, muscle type;Phosphofructo-1-kinase isozyme A;cDNA FLJ56281, high…	PFKL;PFKF;PFKP;PFKM;PFKX;DKFZp686L2097;DKFZp686G1648;PFK-P;RP11-298E9.2-004;RP11-298E9.2-002	cDNA FLJ44241 fis, clone THYMU3008436, highly similar to 6-phosphofructokinase, muscle type;6-phosphofructokinase, liver type (EC 2.7.1.11) (Phosphofructokinase 1) (Phosphohexokinase) (Phosphofructo-1-kinase isozyme B) (PFK-B). Isoform 2;6-phosphofructokin	Q6ZTT1;P17858-2;P17858;Q01813;Q5VSR8;P08237-1;P08237;B4E162;P17858-1;B3KNQ7;B4E108;Q6MZK4;Q7L2M7;Q7Z3R9;Q9BSP4;B3KS15;O14943;Q49A78;Q5VSR7;Q8WTZ9;P08237-2;Q96I60;Q5VSR5	8	1	1	1	0	0	1	0	0	0	1	0	0	0	1	0	1.1	1.1	1.1	93.219	851			1		0.0042812	58532	0	0	58532	0	0	0	58532	0	1
474	284;484;994;1212;1503;1680;2670;3059;3276			IPI00465248;IPI00759806;IPI00216171;IPI00218474;IPI00909949;IPI00791564;IPI00942494;IPI00909595;IPI00790892	IPI00465248;IPI00759806	IPI00465248	9;5;1;1;1;1;1;1;1	9;5;1;1;1;1;1;1;1	9;5;1;1;1;1;1;1;1	2-phospho-D-glycerate hydro-lyase;Alpha-enolase;C-myc promoter-binding protein;Enolase 1;MBP-1;MPB-1;Non-neural enolase;Phosphopyruvate hydratase;Plasminogen-binding protein;Enolase	ENO1;ENO1L1;MBPB1;MPB1	Isoform alpha-enolase of Alpha-enolase;Isoform MBP-1 of Alpha-enolase	P06733-1;P06733;A4QMW8;A4UCS8;Q96GV1;Q9BT62;P06733-2	9	9	9	9	9	9	9	8	9	9	9	8	9	9	9	8	30.4	30.4	30.4	47.168	434	13	12	13	11	1.63e-166	20124000	2364800	2727600	10042000	4990500	2310300	3052300	10521000	8565700	4
475	1269			IPI00465294;IPI00909093	IPI00465294;IPI00909093	IPI00465294	1;1	1;1	1;1	Cell division cycle 5-like protein;Pombe cdc5-related protein;cDNA FLJ16777 fis, clone BRHIP2029567, highly similar to Cell division cycle 5-like protein;cDNA FLJ51295, highly similar to Cell division cycle 5-like protein	CDC5L;KIAA0432;PCDC5RP	Cell division cycle 5-like protein;cDNA FLJ51295, highly similar to Cell division cycle 5-like protein	Q99459;B3KY60;B4DSH1	2	1	1	1	1	1	1	1	1	1	1	1	1	1	1	1	1.1	1.1	1.1	92.25	802	1	1	1	1	0.0082936	3624800	176570	100740	3058600	288930	48416	29859	3505600	282050	4
476	932			IPI00465315;IPI00917605	IPI00465315;IPI00917605	IPI00465315	1;1	1;1	1;1	Cytochrome c;Putative uncharacterized protein CYCS	CYC;CYCS	Cytochrome c;Putative uncharacterized protein CYCS	P99999;Q6LER6;C9JFR7	2	1	1	1	1	1	1	1	1	1	1	1	1	1	1	1	16.2	16.2	16.2	11.749	105	1	1	1	1	0.00015993	238280	34899	54600	103260	45528	33670	56941	140990	58070	4
477	174;2989			IPI00465378;IPI00657743	IPI00465378;IPI00657743	IPI00465378	2;1	2;1	2;1	Apolipoprotein A5;Apolipoprotein A-V;Regeneration-associated protein 3;cDNA FLJ75539, highly similar to Homo sapiens apolipoprotein A-V (APOA5) gene;Apolipoprotein A-V variant 3;cDNA, FLJ96227, Homo sapiens apolipoprotein A-V (APOA5), mRNA;Putative uncharacterized protein APOA5	APOA5;RAP3;UNQ411/PRO773	Apolipoprotein A-V;Putative uncharacterized protein APOA5	Q6Q788;A8K9M4;B0YIW1;C9JZZ0	2	2	2	2	2	2	0	1	2	2	0	1	2	2	0	1	7.9	7.9	7.9	41.212	366	2	2		1	2.47e-14	298340	153040	85314	0	59991	131440	59041	0	202120	3
407	1261			IPI00470502;IPI00301109;IPI00654717;IPI00470503;IPI00413014;IPI00749469;IPI00910509	IPI00470502;IPI00301109;IPI00654717;IPI00470503;IPI00413014;IPI00749469;IPI00910509	IPI00470502	1;1;1;1;1;1;1	1;1;1;1;1;1;1	1;1;1;1;1;1;1	Inorganic pyrophosphatase 2, mitochondrial;Pyrophosphatase SID6-306;Pyrophosphate phospho-hydrolase 2;cDNA FLJ60819, highly similar to Inorganic pyrophosphatase 2, mitochondrial (EC 3.6.1.1);cDNA FLJ76209, highly similar to Homo sapiens inorganic pyrophosphatase 2 (PPA2), transcript variant 2, mRNA;Putative uncharacterized protein PPA2;cDNA FLJ59863, highly similar to Inorganic pyrophosphatase 2,…	HSPC124;PPA2	Isoform 2 of Inorganic pyrophosphatase 2, mitochondrial;Isoform 1 of Inorganic pyrophosphatase 2, mitochondrial;inorganic pyrophosphatase 2 isoform 5 precursor;Isoform 3 of Inorganic pyrophosphatase 2, mitochondrial;inorganic pyrophosphatase 2 isoform 3 pr	Q9H2U2-2;Q9H2U2;Q9H2U2-1;B4DR66;Q9H2U2-3;A8K0P2;A6NKL9;C9JKC0;B4DFH3	7	1	1	1	1	1	1	1	1	1	1	1	1	1	1	1	4.6	4.6	4.6	39.638	349	1	1	1	1	5.31e-11	110390	36835	27570	30935	15048	50674	38203	26283	20446	4
46	379;1078;1108;1119;1120;1273;1327			IPI00470573;IPI00005159;IPI00909247;IPI00176593	IPI00470573;IPI00005159;IPI00909247	IPI00470573	7;7;4;3	7;7;4;3	7;7;4;3	cDNA FLJ51656, highly similar to Actin-like protein 2;Actin-like protein 2;Actin-related protein 2;ACTR2 protein;cDNA FLJ51655, highly similar to Actin-like protein 2	ACTR2;ARP2	actin-related protein 2 isoform a;Actin-related protein 2;cDNA FLJ51655, highly similar to Actin-like protein 2	B4DHK9;P61160;Q8IY98;B4DWQ5	4	7	7	7	7	7	7	7	7	7	7	7	7	7	7	7	22.3	22.3	22.3	45.376	399	7	7	7	7	3.38e-50	11346000	3005700	2673200	3583000	2083800	3639500	3444300	3698700	3263900	4
480	167;168;319;480;756;3129			IPI00472652;IPI00930234;IPI00930572;IPI00941193;IPI00942737;IPI00887461;IPI00743117;IPI00472130;IPI00472867;IPI00471955;IPI00472402;IPI00472416;IPI00472456;IPI00472800;IPI00472210;IPI00473068;IPI00946086;IPI00935159;IPI00943924;IPI00930323;IPI00472057;IPI00472458;IPI00954147;IPI00954065;IPI00930672;IPI00954514;IPI00954548;IPI00954168;IPI00953986;IPI00954032;IPI00954174;IPI00954455;IPI00954589;IPI…	IPI00472652;IPI00930234;IPI00930572;IPI00941193;IPI00942737;IPI00887461;IPI00743117;IPI00472130;IPI00472867;IPI00471955;IPI00472402;IPI00472416;IPI00472456;IPI00472800;IPI00472210;IPI00473068;IPI00946086;IPI00935159;IPI00943924;IPI00930323;IPI00472057;IPI00472458;IPI00954147;IPI00954065;IPI00930672;IPI00954514;IPI00954548;IPI00954168;IPI00953986;IPI00954032;IPI00954174;IPI00954455;IPI00954589;IPI…	IPI00472652	6;6;6;5;5;5;5;5;5;5;5;5;5;5;5;5;5;5;5;5;4;4;4;4;4;4;4;4;4;4;4;4;4;4;4;3;3;3;3;3;3;3;3;3;3;3;3;3;3;3;3;3;3;3;3;3;3;3;3;3;3;3;3;3;3;3;3;3;3;3;3;3;3;3;3;3;3;3;3;3;3;3;3;3;3;3;3;3;3;3;3;3;3;3;3;3;3;3;3;3;3;3;3;3;3;3;3;3;3;3;3;3;3;3;3;3;3;3;3;3;3;3;3;3;3;3;3;3;3;3;3;3;3;3;3;2;2;2;2;2;2;2;2;2;2;2;2;2;2;2;2;2;2;2;2;2;2;2;2;2;2;2;2;2;2;2;2;2;2;2;2;1;1;1;1;1;1;1;1;1;1;1;1;1;1;1;1;1;1;1;1;1;1;1;1;1;1;1;1;1…	1;1;1;0;0;0;0;1;1;0;0;0;0;1;1;1;1;1;1;1;1;0;1;1;1;1;1;1;1;1;1;1;1;1;1;1;0;1;0;1;0;0;0;0;0;0;0;1;1;1;1;1;1;1;0;0;1;1;1;1;0;1;1;1;1;0;1;1;1;0;0;1;0;1;0;0;1;1;1;1;1;1;1;1;1;0;1;1;1;0;0;0;0;1;0;1;1;1;1;0;1;1;1;0;1;0;1;0;0;1;1;0;1;0;0;0;1;1;0;1;1;1;1;0;0;0;1;1;1;0;1;0;0;0;1;1;1;1;1;1;1;1;0;0;1;0;0;0;1;0;0;0;1;1;0;1;0;0;0;1;0;1;0;0;0;1;0;1;1;1;1;0;0;0;0;0;0;0;0;1;0;0;0;0;0;0;1;0;0;0;0;0;0;0;0;0;0;0;0;0…	0;0;0;0;0;0;0;0;0;0;0;0;0;0;0;0;0;0;0;0;0;0;0;0;0;0;0;0;0;0;0;0;0;0;0;0;0;0;0;0;0;0;0;0;0;0;0;0;0;0;0;0;0;0;0;0;0;0;0;0;0;0;0;0;0;0;0;0;0;0;0;0;0;0;0;0;0;0;0;0;0;0;0;0;0;0;0;0;0;0;0;0;0;0;0;0;0;0;0;0;0;0;0;0;0;0;0;0;0;0;0;0;0;0;0;0;0;0;0;0;0;0;0;0;0;0;0;0;0;0;0;0;0;0;0;0;0;0;0;0;0;0;0;0;0;0;0;0;0;0;0;0;0;0;0;0;0;0;0;0;0;0;0;0;0;0;0;0;0;0;0;0;0;0;0;0;0;0;0;0;0;0;0;0;0;0;0;0;0;0;0;0;0;0;0;0;0;0;0;0…	HLA class I histocompatibility antigen, B-37 alpha chain;MHC class I antigen B*37;MHC class I antigen;Major histocompatibility complex, class I, B;MHC class I antigen HLA-B heavy chain;Bw-44;HLA class I histocompatibility antigen, B-44 alpha chain;MHC class I antigen B*44;HLA B44;HLA class I antigen;MHC class l antigen;HLA-B;MHC class I HLA-B;HLA-B antigen;Lymphocyte antigen;HLA-B alpha-chain;MHC…	HLAB;HLA-B;DAMA-387C9.2-001;HLA B;DASS-311G1.2-003;DAMA-387C9.2-003;DAMA-387C9.2-006;DAMC-153L10.1-006;DASS-311G1.2-006;XXbac-BCX25O20.1-006;DAQB-48K1.2-006;HLA-B*0707;HLA-B gene	HLA class I histocompatibility antigen, B-37 alpha chain;MHC class I antigen (Fragment);MHC class I antigen (Fragment);48 kDa protein;48 kDa protein;Major histocompatibility complex, class I, B;HLA class I histocompatibility antigen, B-44 alpha chain;HLA c	P18463;C0KXH2;Q4U4M8;Q95IY4;A3F719;A7WPJ1;A9QUT8;B3GV26;B6ED01;C6KEB2;C6L831;C6L832;Q2L6G2;Q2YDY9;Q7YNX5;Q9GIX4;Q9TP45;Q9TPP7;P30481;A0N001;A1XAM5;A3F967;A4HQM5;A5H2C3;A8KNJ4;A9JPE8;B0JF24;B0ZSE8;B1PJM3;B1PQ31;B2ZCW1;B2ZCX7;B3W6N3;B5LZ19;B6D4Y0;B7VFE3;B7VU67;B8YPU8;B9VSJ9;C0KLR3;C0L076;C0M113;C0M132;C5IYE8;C5IZS5;C5IZS7;C5IZT3;C5J025;C5MR74;C6K6H6;C7E577;C7EA89;C7EX07;C7FDR6;C8C3Y8;C8CH77;C8CJB0;…	225	6	1	0	4	5	6	4	1	0	1	0	0	0	0	0	25.1	3.9	0	40.456	362	1		1		7.92e-91	2612900	1985800	0	627110	0	2835900	0	193290	0	2
481	169;318;749;2824;3129			IPI00472855;IPI00745649;IPI00472035;IPI00796489;IPI00790450;IPI00914567;IPI00954500;IPI00797121;IPI00914583	IPI00472855;IPI00745649;IPI00472035	IPI00472855	5;3;3;2;2;2;2;2;2	1;0;0;0;0;0;0;0;0	0;0;0;0;0;0;0;0;0	HLA class I histocompatibility antigen, A-30 alpha chain;MHC class I antigen A*30;HLA class I histocompatibility antigen, Cw-16 alpha chain;MHC class I antigen Cw*16;MHC class I antigen;MHC class I HLA-C antigen;HLA-Cw*0702;MHC class I HLA-C heavy chain;MHC class I protein HLA-C heavy chain;HLA-C protein;Major histocompatibility complex, class I, C;MHC class I antigen HLA-C;Leucocyte antigen C;Pu…	HLA-A;HLAA;HLAC;HLA-C;Cw*08;HLA-Cw;DAMA-387C9.3-001;MHC class I	HLA class I histocompatibility antigen, A-30 alpha chain;Isoform 1 of HLA class I histocompatibility antigen, Cw-16 alpha chain;Isoform 2 of HLA class I histocompatibility antigen, Cw-16 alpha chain	P16188;Q29960-1;Q29960;A7MAP5;B1GYE6;B2BD81;C7FDT1;O19553;O19574;O19575;O19654;O19753;O19761;O78179;Q29914;Q30193;Q5K018;Q5K095;Q7JFH7;Q861B1;Q96FQ5;Q9MYH7;Q9MYH9;Q9TNZ7;Q29960-2	9	5	1	0	4	4	4	4	0	0	1	0	0	0	0	0	20.5	4.7	0	40.904	365			1		9.63e-60	892350	0	0	892350	0	0	0	892350	0	1
469	411			IPI00472939;IPI00452747	IPI00472939;IPI00452747	IPI00472939	1;1	1;1	1;1	Microsomal signal peptidase 25 kDa subunit;Signal peptidase complex subunit 2;cDNA FLJ56339, highly similar to Signal peptidase complex subunit 2 (EC 3.4.-.-)	KIAA0102;SPC25;SPCS2	Signal peptidase complex subunit 2;Similar to Signal peptidase complex subunit 2	Q15005;B4DDB9	2	1	1	1	1	0	0	0	1	0	0	0	1	0	0	0	8	8	8	25.003	226	1				9.1e-07	75694	75694	0	0	0	91562	0	0	0	1
482	548;1482;1598;1677;2917;2965;3047			IPI00473011;IPI00940370;IPI00657660;IPI00829896;IPI00791558;CON__Q3SX09;IPI00749035;IPI00744503;IPI00939160;IPI00939544;IPI00554676;IPI00220706;IPI00217471;CON__P02070;IPI00657911;IPI00853641	IPI00473011;IPI00940370;IPI00657660;IPI00829896;IPI00791558	IPI00473011	7;5;5;5;4;2;1;1;1;1;1;1;1;1;1;1	2;1;1;1;1;0;0;0;0;0;0;0;0;0;0;0	1;0;0;0;0;0;0;0;0;0;0;0;0;0;0;0	Delta-globin;Hemoglobin delta chain;Hemoglobin subunit delta;Delta globin;Delta-globin chain;Hemoglobin delta;Hemoglobin, delta;Part of human delta-globin (amino acids 105 to 122).;Hemoglobin Lepore-Baltimore;Delta-globin B2 variant;Delta-hemoglobin;Hemoglobin delta Etolia variant	HBD;hCG_1641001	Hemoglobin subunit delta;19 kDa protein;15 kDa protein;Hemoglobin Lepore-Baltimore (Fragment);Delta-globin B2 variant	P02042;A0N071;Q9UE58;Q670S4;B2M1S8;Q14485;Q4F786	16	7	2	1	7	7	6	7	2	2	1	2	1	1	0	1	49.7	17	8.2	16.055	147	2	2	1	2	2.13e-60	2813400	1117900	852270	302020	541280	1521500	1113900	395820	602980	4
483	530;1418			IPI00473014;IPI00845388	IPI00473014;IPI00845388	IPI00473014	2;2	2;2	2;2	Actin-depolymerizing factor;Destrin;cDNA FLJ52030, highly similar to Destrin;Destrin (Actin depolymerizing factor), isoform CRA_a;cDNA, FLJ78893, highly similar to Destrin	ACTDP;DSN;DSTN;hCG_2019292	Destrin;destrin isoform b	P60981;B4DYA6;B7Z9M9	2	2	2	2	1	1	2	2	1	1	2	2	1	1	2	2	10.3	10.3	10.3	18.506	165	1	1	2	2	3.61e-09	506810	39279	38617	304760	124150	22809	24241	356560	197690	4
485	427;716;1170;1546;2096;2681;2682;2973	56;57	149;235	IPI00477992;IPI00643948	IPI00477992;IPI00643948	IPI00477992	8;7	8;7	8;7	Complement C1q subcomponent subunit B;Complement component 1, q subcomponent, B chain;Complement subcomponent C1q chain B	C1QB;RP4-815O16.3-002	complement component 1, q subcomponent, B chain precursor;Complement component 1, q subcomponent, B chain	P02746;Q5T960;Q6LDZ7	2	8	8	8	7	5	8	6	7	5	8	6	7	5	8	6	34.4	34.4	34.4	26.721	253	18	14	34	19	1.54e-158	873680000	6754000	6314300	848520000	12092000	29285000	41735000	796440000	16824000	4
486	50;89;127;162;222;230;263;391;402;458;729;808;880;924;1161;1178;1452;1597;1644;1660;1703;1762;1829;1977;2004;2083;2164;2206;2213;2267;2286;2393;2538;2546;2625;2634;2825;2871;3016;3023;3067;3172			IPI00478003;CON__ENSEMBL:ENSBTAP00000024146;IPI00789547;IPI00878729;IPI00796830	IPI00478003	IPI00478003	42;6;5;2;1	42;6;5;2;1	36;4;5;2;1	Alpha-2-macroglobulin;C3 and PZP-like alpha-2-macroglobulin domain-containing protein 5	A2M;CPAMD5;FWP007	Alpha-2-macroglobulin	P01023;Q9BQ22	5	42	42	36	35	39	29	42	35	39	29	42	30	34	26	36	40	40	35.1	163.29	1474	46	53	35	54	0	107300000	9568800	15384000	5173300	77177000	7586800	13959000	2400800	136330000	4
487	417			IPI00478231;IPI00927114;IPI00926710;IPI00789934;IPI00926881;IPI00926466	IPI00478231;IPI00927114;IPI00926710;IPI00789934;IPI00926881;IPI00926466	IPI00478231	1;1;1;1;1;1	1;1;1;1;1;1	1;1;1;1;1;1	Rho cDNA clone 12;Transforming protein RhoA;cDNA FLJ57740, highly similar to Transforming protein RhoA;ARHA protein;Putative uncharacterized protein RHOA	ARH12;ARHA;RHO12;RHOA	Transforming protein RhoA;Putative uncharacterized protein RHOA;Putative uncharacterized protein RHOA;12 kDa protein;Putative uncharacterized protein RHOA;Putative uncharacterized protein RHOA	P61586;B4DKN9;Q53HM4;Q9BVT0;C9JX21;C9JNR4;C9JRM1;C9J1T2	6	1	1	1	1	1	1	1	1	1	1	1	1	1	1	1	12.4	12.4	12.4	21.768	193	1	1	1	1	2.64e-07	484450	47328	78708	182790	175630	38452	84047	180780	320540	4
452	1386;1802			IPI00478410;IPI00395769	IPI00478410;IPI00395769	IPI00478410	2;2	2;2	2;2	ATP synthase subunit gamma, mitochondrial;F-ATPase gamma subunit;ATP synthase gamma chain;cDNA FLJ59861, highly similar to ATP synthase gamma chain, mitochondrial (EC 3.6.3.14)	ATP5C;ATP5C1;ATP5CL1;hCG_25112;RP11-401E9.1-001	Isoform Liver of ATP synthase subunit gamma, mitochondrial;Isoform Heart of ATP synthase subunit gamma, mitochondrial	P36542-1;P36542;Q6I9V2;Q8TAS0;P36542-2;B4DFE6;B4DL14	2	2	2	2	2	2	2	2	2	2	2	2	2	2	2	2	6.4	6.4	6.4	32.996	298	2	2	2	2	8.15e-14	1669300	717980	563130	262660	125530	1092200	651190	128470	196380	4
488	158;492;493;745;857;873;879;1067;1348;1397;1436;1507;1522;1689;2611;2955			IPI00479186;IPI00910979;IPI00847989;IPI00941899;IPI00220644;IPI00909560;IPI00888126;IPI00604528;IPI00743713;IPI00871353;IPI00027165;IPI00941093;IPI00909829	IPI00479186;IPI00910979;IPI00847989;IPI00941899;IPI00220644;IPI00909560;IPI00888126	IPI00479186	16;14;14;13;13;12;10;7;1;1;1;1;1	16;14;14;13;13;12;10;7;1;1;1;1;1	16;14;14;13;13;12;10;7;1;1;1;1;1	Cytosolic thyroid hormone-binding protein;Opa-interacting protein 3;p58;Pyruvate kinase 2/3;Pyruvate kinase isozymes M1/M2;Pyruvate kinase muscle isozyme;Thyroid hormone-binding protein 1;Tumor M2-PK;Pyruvate kinase;Pyruvate kinase M2	OIP3;PK2;PK3;PKM;PKM2	Isoform M2 of Pyruvate kinase isozymes M1/M2;Pyruvate kinase;Pyruvate kinase;66 kDa protein;Isoform M1 of Pyruvate kinase isozymes M1/M2;Pyruvate kinase;similar to pyruvate kinase, muscle	P14618-1;P14618;B4DUU6;B4DNK4;Q8WUW7;Q9NYI7;Q9UK31;Q9UKK4;P14618-2;B4DRT3	13	16	16	16	16	16	16	16	16	16	16	16	16	16	16	16	37.9	37.9	37.9	57.936	531	19	19	19	19	1.8e-184	43051000	7739100	6907100	17789000	10616000	8274700	8115500	19266000	17503000	4
342	21;517;1316;1317;1455;1834;1836;1908;2334;2335			IPI00513698;IPI00013991;IPI00220709;CON__Q3SX28;IPI00646748;IPI00218820;IPI00910712;IPI00926427	IPI00513698;IPI00013991;IPI00220709;CON__Q3SX28;IPI00646748;IPI00218820;IPI00910712;IPI00926427	IPI00513698	10;10;10;10;10;10;6;5	2;2;2;2;2;2;2;2	2;2;2;2;2;2;2;2	Tropomyosin 2 (Beta);Beta-tropomyosin;Tropomyosin beta chain;Tropomyosin-2;Beta tropomyosin isoform;cDNA FLJ56690, highly similar to Tropomyosin beta chain;cDNA FLJ57036, highly similar to Homo sapiens tropomyosin 2 (beta) (TPM2), transcript variant 2, mRNA	RP11-112J3.4-005;TPM2;TMSB;TPM2b;RP11-112J3.4-006	Tropomyosin 2;Isoform 1 of Tropomyosin beta chain;Isoform 2 of Tropomyosin beta chain;>Q3SX28 TREMBL:Q3SX28;Q5KR48 (Bos taurus) Tropomyosin 2;Tropomyosin 2;Isoform 3 of Tropomyosin beta chain;cDNA FLJ57036, highly similar to Homo sapiens tropomyosin 2 (bet	Q5TCU8;P07951-1;P07951;A7XZE4;P07951-2;B4DGC2;Q3SX28;Q5KR48;Q5TCU3;P07951-3;B4E3P1	8	10	2	2	9	9	7	10	1	1	1	2	1	1	1	2	18	7.1	7.1	36.747	322	1	1	1	2	1.63e-39	11599000	2751200	2468800	3445800	2933200	3519800	3379800	3687000	4106000	4
338	133			IPI00549725;IPI00374975;IPI00453476;IPI00218570;IPI00844133;IPI00786897;IPI00930416	IPI00549725;IPI00374975;IPI00453476;IPI00218570;IPI00844133;IPI00786897;IPI00930416	IPI00549725	1;1;1;1;1;1;1	1;1;1;1;1;1;1	1;1;1;1;1;1;1	BPG-dependent PGAM 1;Phosphoglycerate mutase 1;Phosphoglycerate mutase isozyme B;cDNA FLJ53048, highly similar to Phosphoglycerate mutase 1 (EC 5.4.2.1);cDNA FLJ51983, highly similar to Phosphoglycerate mutase 1 (EC 5.4.2.1);cDNA FLJ53061, highly similar to Phosphoglycerate mutase 1 (EC 5.4.2.1);HCG2015269, isoform CRA_c;cDNA, FLJ78809, highly similar to Phosphoglycerate mutase 1 (EC 5.4.2.1);Pho…	CDABP0006;PGAM1;PGAMA;hCG_2015269;hCG_25778;RP11-452K12.8-001;PGAM3;PGAM4;PGAM2;PGAMM;tcag7.794	Phosphoglycerate mutase 1;Probable phosphoglycerate mutase 4;29 kDa protein;Phosphoglycerate mutase 2;Phosphoglycerate mutase;26 kDa protein;Putative uncharacterized protein	P18669;B4DJA4;B4DKL5;B4DMJ7;B7Z9E5;Q0D2Q6;Q53G35;Q6FHK8;Q6FHU2;Q6P6D7;Q8N0Y7;O00228;P15259;A4D2J6;B7ZW15	7	1	1	1	1	1	1	1	1	1	1	1	1	1	1	1	5.5	5.5	5.5	28.804	254	1	1	1	1	3.31e-06	346120	47435	47377	177250	74055	36246	39132	264820	74808	4
151	2553			IPI00550119;IPI00019376;IPI00871284;IPI00941331;IPI00644857;IPI00744597;IPI00952909;IPI00216139;IPI00376992	IPI00550119;IPI00019376;IPI00871284;IPI00941331;IPI00644857;IPI00744597;IPI00952909;IPI00216139;IPI00376992	IPI00550119	1;1;1;1;1;1;1;1;1	1;1;1;1;1;1;1;1;1	1;1;1;1;1;1;1;1;1	cDNA FLJ58821, highly similar to Septin-6;Septin-11;Septin 6 isoform E;Septin-6;Septin 6;Septin 6, isoform CRA_b;cDNA FLJ77872, highly similar to Homo sapiens SEPTIN6 type V (SEPTIN6) mRNA;Septin 6, isoform CRA_e;cDNA FLJ14373 fis, clone HEMBA1001595, highly similar to SEPTIN 2 HOMOLOG;cDNA FLJ59646, highly similar to Septin-6;cDNA FLJ58747, highly similar to Septin-6;Septin 6, isoform CRA_d;cDNA…	SEPT11;KIAA0128;SEP2;SEPT6;hCG_23191;RP5-876A24.2-002;RP5-876A24.2-004;RP5-876A24.2-003	cDNA FLJ58821, highly similar to Septin-6;Isoform 2 of Septin-11;Septin 6 isoform E;Isoform II of Septin-6;Septin 6, isoform CRA_b;Isoform V of Septin-6;Isoform 1 of Septin-11;Isoform I of Septin-6;cDNA FLJ59732, highly similar to Septin-6	B4DZW0;Q9NVA2-2;Q9NVA2;Q6B514;Q14141-1;Q14141;B1AMS2;Q14141-4;Q548C9;Q6NT82;Q9NVA2-1;Q96KC0;Q14141-2;B4E049;Q541S4;Q14141-3;B4DPT4	9	1	1	1	1	1	1	1	1	1	1	1	1	1	1	1	2.4	2.4	2.4	52.183	457	1	1	1	1	2.85e-06	788820	241280	157320	258240	131980	283690	199960	278060	205150	4
491	419;856;2150			IPI00550523;IPI00845461	IPI00550523	IPI00550523	3;1	3;1	3;1	Atlastin-3;cDNA FLJ58636, moderately similar to Atlastin	ATL3	Isoform 1 of Atlastin-3	Q6DD88-1;Q6DD88;B4DXC4	2	3	3	3	3	3	3	3	3	3	3	3	3	3	3	3	7.6	7.6	7.6	60.541	541	3	3	3	3	2.5e-13	1172200	527770	331750	185310	127400	971180	259430	115970	114640	4
492	446;814;2371;2557;2789;2826;2827;2999			IPI00550731;IPI00939470;IPI00941420;IPI00939805;IPI00784773;IPI00909649;IPI00942608;IPI00941203;IPI00939996;IPI00743194;IPI00829600;IPI00829947;IPI00829663;IPI00893819;IPI00827829;IPI00953695;IPI00387107;IPI00384397;IPI00827773;IPI00736885;IPI00854709;IPI00922330	IPI00550731;IPI00939470;IPI00941420;IPI00939805;IPI00784773;IPI00909649;IPI00942608;IPI00941203	IPI00550731	8;6;6;6;6;5;4;4;1;1;1;1;1;1;1;1;1;1;1;1;1;1	2;0;0;0;0;0;0;0;1;1;1;1;1;1;1;1;1;1;1;1;1;1	2;0;0;0;0;0;0;0;1;1;1;1;1;1;1;1;1;1;1;1;1;1	Putative uncharacterized protein;Putative uncharacterized protein ENSP00000415360;Putative uncharacterized protein ENSP00000392389		Putative uncharacterized protein;26 kDa protein;26 kDa protein;26 kDa protein;Putative uncharacterized protein;Protein;Putative uncharacterized protein IGKC;Putative uncharacterized protein IGKC	Q8TCD0;C9J327;Q7Z3Y4;C9JEE5;C9J2E4	22	8	2	2	7	7	8	7	1	1	2	1	1	1	2	1	40.2	16.3	16.3	26.234	239	1	1	2	1	5.79e-208	13416000	688380	536180	10550000	1641700	439650	349540	11887000	2032600	4
493	95;179;727			IPI00550792;IPI00795778;IPI00797365	IPI00550792;IPI00795778	IPI00550792	3;2;1	3;2;1	3;2;1	Breast cancer-associated protein 1;Bridging integrator 2;cDNA, FLJ95061, highly similar to Homo sapiens bridging integrator 2 (BIN2), mRNA;cDNA FLJ56245, highly similar to Homo sapiens bridging integrator 2 (BIN2), mRNA	BIN2;BRAP1	Isoform 1 of Bridging integrator 2;Isoform 2 of Bridging integrator 2	Q9UBW5-1;Q9UBW5;B2RAR0;B7Z6F3;Q9UBW5-2	3	3	3	3	2	3	3	3	2	3	3	3	2	3	3	3	9.9	9.9	9.9	61.874	565	2	3	3	3	1.95e-36	2546900	115860	386660	1371300	673070	145200	507870	1376100	1064200	4
494	14;102;238;365;483;570;643;781;1350;1450;2044	58;59	229;230	IPI00550991;IPI00847635	IPI00550991;IPI00847635	IPI00550991	11;11	11;11	11;11	Alpha-1-antichymotrypsin;Alpha-1-antichymotrypsin His-Pro-less;Cell growth-inhibiting gene 24/25 protein;Serpin A3;cDNA FLJ35730 fis, clone TESTI2003131, highly similar to ALPHA-1-ANTICHYMOTRYPSIN	GIG24;GIG25;SERPINA3;AACT	cDNA FLJ35730 fis, clone TESTI2003131, highly similar to ALPHA-1-ANTICHYMOTRYPSIN;Isoform 1 of Alpha-1-antichymotrypsin	P01011-2;P01011;B3KS79;P01011-1	2	11	11	11	10	11	11	10	10	11	11	10	10	11	11	10	33.5	33.5	33.5	50.598	448	12	16	14	15	1.74e-112	15111000	2155100	3507400	2113500	7334500	2073500	3399700	1207200	14355000	4
496	732;2428			IPI00552578;IPI00006146;IPI00895943	IPI00552578;IPI00006146;IPI00895943	IPI00552578	2;1;1	2;1;1	2;1;1	Amyloid fibril protein AA;Amyloid protein A;Serum amyloid A protein;Serum amyloid protein A(2-102);Serum amyloid protein A(2-103);Serum amyloid protein A(2-104);Serum amyloid protein A(3-104);Serum amyloid protein A(4-101)	SAA1;SAA2	Serum amyloid A protein;serum amyloid A2 isoform a;serum amyloid A2 isoform b	P02735;Q15423	3	2	2	2	2	2	2	2	2	2	2	2	2	2	2	2	27.9	27.9	27.9	13.532	122	2	2	2	2	7.46e-34	3253000	75298	246980	2490000	440660	23972	90054	2843500	651200	4
240	416			IPI00552834;IPI00027434;IPI00647268;IPI00643368;IPI00644425	IPI00552834;IPI00027434;IPI00647268;IPI00643368;IPI00644425	IPI00552834	1;1;1;1;1	1;1;1;1;1	1;1;1;1;1	Ras homolog gene family, member C;Rho cDNA clone 9;Rho-related GTP-binding protein RhoC	RHOC;RP11-426L16.4-005;ARH9;ARHC;RP11-426L16.4-008;RP11-426L16.4-010;RP11-426L16.4-013	Ras homolog gene family, member C;Rho-related GTP-binding protein RhoC;Ras homolog gene family, member C;Ras homolog gene family, member C;Ras homolog gene family, member C	Q5JR05;P08134;Q5JR08;Q5JR07;Q5JR06	5	1	1	1	1	1	1	1	1	1	1	1	1	1	1	1	12.1	12.1	12.1	21.994	199	1	1	1	1	0.00093388	166610	12867	24477	76519	52742	12571	28892	61802	105170	4
497	239;451;589;763;780;952;1043;1354;1362;1453;1460;1469;1721;1765;1783;1878;1879;2152;2230;2517;2568;2710;2861	60	266	IPI00553177;IPI00790784;IPI00869004;IPI00305457	IPI00553177;IPI00790784;IPI00869004	IPI00553177	23;18;15;8	23;18;15;8	23;18;15;8	Alpha-1 protease inhibitor;Alpha-1-antiproteinase;Alpha-1-antitrypsin;Serpin A1;Short peptide from AAT;Alpha-1-antitrypsin NULL GENOVA variant;Alpha-1 antitrypsin Valcamonica variant;Alpha-1 antitrypsin;Alpha-1-antitrypsin MBrescia variant;Alpha-1-antitrypsin NULL(BRESCIA) variant	PI;PRO0684;PRO2209;SERPINA1;AAT	Isoform 1 of Alpha-1-antitrypsin;Isoform 2 of Alpha-1-antitrypsin;Isoform 3 of Alpha-1-antitrypsin	P01009-1;P01009;P01009-2;A6YP93;A7L8C5;A7L8C6;B2D098;Q13747;Q2L9S7;Q3I0J7;P01009-3	4	23	23	23	23	23	21	20	23	23	21	20	23	23	21	20	56.5	56.5	56.5	46.736	418	34	34	30	31	2.23e-269	178950000	25418000	38945000	22805000	91784000	21932000	39600000	14351000	175370000	4
499	514;612;692;1116;1424;2368;2915;2982;3228			IPI00555812;IPI00954102	IPI00555812;IPI00954102	IPI00555812	9;7	9;7	9;7	Gc-globulin;Group-specific component;Vitamin D-binding protein;Vitamin D binding protein protein	GC;vitamin D binding protein	Isoform 1 of Vitamin D-binding protein;Isoform 2 of Vitamin D-binding protein	P02774-1;P02774;Q6LDC6;P02774-2	2	9	9	9	9	9	8	9	9	9	8	9	9	9	8	9	25.5	25.5	25.5	52.963	474	10	10	9	10	6.93e-66	19414000	5330200	4729400	2403100	6951800	6928900	5760500	2154100	11308000	4
41	2389			IPI00556590;IPI00004397;IPI00217519;IPI00927371;IPI00926453;IPI00927712;IPI00925885;IPI00927929	IPI00556590;IPI00004397;IPI00217519;IPI00927371;IPI00926453;IPI00927712;IPI00925885;IPI00927929	IPI00556590	1;1;1;1;1;1;1;1	1;1;1;1;1;1;1;1	1;1;1;1;1;1;1;1	cDNA FLJ40085 fis, clone TESTI2002993;cDNA FLJ55177, highly similar to Ras-related protein Ral-B;Putative uncharacterized protein RALB;Ras-related protein Ral-A;Ras-related protein Ral-B;cDNA FLJ54954, highly similar to Ras-related protein Ral-B;cDNA, FLJ92808, Homo sapiens v-ral simian leukemia viral oncogene homolog B (rasrelated; GTP binding protein) (RALB), mRNA;V-ral simian leukemia viral on…	RALB;RAL;RALA;hCG_17321	cDNA FLJ40085 fis, clone TESTI2002993;cDNA FLJ55177, highly similar to Ras-related protein Ral-B;Ras-related protein Ral-A;Ras-related protein Ral-B;Putative uncharacterized protein RALB;Putative uncharacterized protein RALA;Putative uncharacterized protei	Q8N836;B4E040;C9JQB3;P11233;A4D1W3;P11234;B4E364;Q53T32;C9J6B1;C9JZC9;C9JYR1;C9JPE8	8	1	1	1	1	1	1	1	1	1	1	1	1	1	1	1	3.7	3.7	3.7	57.495	541	1	1	1	1	2.64e-13	266970	37897	46776	106760	75544	35508	47375	82692	168990	4
281	221;321;495;518;604;605;826;992;1431;1691	40	45	IPI00604523;IPI00033494;IPI00220573;IPI00719669;IPI00921274;IPI00642780;IPI00376572;IPI00888438;IPI00647211	IPI00604523;IPI00033494;IPI00220573;IPI00719669;IPI00921274;IPI00642780	IPI00604523	10;10;10;9;9;5;2;2;1	10;10;10;9;9;5;2;2;1	4;4;4;4;4;0;0;0;0	Myosin regulatory light chain MRCL3 variant;MLC-2A;Myosin regulatory light chain 12B;Myosin regulatory light chain 20 kDa;Myosin regulatory light chain 2-B, smooth muscle isoform;Myosin regulatory light chain MRLC2;SHUJUN-1;MLC-2B;Myosin regulatory light chain 12A;Myosin regulatory light chain 2, nonsarcomeric;Myosin regulatory light chain MRLC3;Myosin RLC;Myosin regulatory light chain;cDNA FLJ76…	MRLC2;MYL12B;MYLC2B;MLCB;MRLC3;MYL12A;RLC;hCG_2045956;MRCL3	Myosin regulatory light chain MRCL3 variant;Myosin regulatory light chain 12B;Myosin regulatory light chain 12A;Myosin regulatory light chain;myosin regulatory light chain MRCL2 isoform B;13 kDa protein	Q53HL1;O14950;P19105;Q2F834;Q53X45;C9JKZ0	9	10	10	4	10	10	10	10	10	10	10	10	4	4	4	4	49.7	49.7	17.5	20.457	177	15	15	14	15	1.04e-251	197540000	82855000	59093000	34196000	21397000	112930000	81131000	26539000	25302000	4
484	332;333;1024;1260;1747;1748;2253;2404;2622;3063			IPI00607707;IPI00477597	IPI00607707;IPI00477597	IPI00607707	10;10	2;2	2;2	Haptoglobin-related protein	HPR	Isoform 2 of Haptoglobin-related protein;Isoform 1 of Haptoglobin-related protein	P00739-2;P00739;P00739-1	2	10	2	2	9	10	8	9	2	2	2	2	2	2	2	2	21.3	7.8	7.8	43.077	385	3	3	3	3	5.85e-52	1275800	197870	278320	653150	146420	149430	328440	737770	274930	4
167	3160			IPI00640525;IPI00641157;IPI00021794	IPI00640525;IPI00641157;IPI00021794	IPI00640525	1;1;1	1;1;1	1;1;1	Carrier family 6, member 8 variant;Protective protein for beta-galactosidase (Galactosialidosis), isoform CRA_b;cDNA FLJ60397, highly similar to Lysosomal protective protein (EC 3.4.16.5);Cathepsin A;Carboxypeptidase C;Carboxypeptidase L;Lysosomal protective protein;Lysosomal protective protein 20 kDa chain;Lysosomal protective protein 32 kDa chain;Protective protein cathepsin A;Protective protei…	hCG_38374;PPGB;CTSA;RP3-337O18.1-005	cathepsin A isoform a precursor;cathepsin A isoform c precursor;Lysosomal protective protein	Q59EV6;B4E324;Q5JZH0;P10619	3	1	1	1	1	1	0	0	1	1	0	0	1	1	0	0	2.6	2.6	2.6	56.232	498	1	1			0.010596	358190	197880	160310	0	0	0	209620	0	0	1
232	2740			IPI00641707;IPI00026994	IPI00641707;IPI00026994	IPI00641707	1;1	1;1	1;1	cDNA FLJ57916, highly similar to WD repeat domain phosphoinositide-interacting protein 4;PRA1 family protein 2;cDNA FLJ13371 fis, clone PLACE1000656, highly similar to PRA1 family protein 2	JM4;PRAF2	cDNA FLJ57916, highly similar to WD repeat domain phosphoinositide-interacting protein 4;PRA1 family protein 2	B4DFG8;O60831;B3KN29	2	1	1	1	1	1	1	1	1	1	1	1	1	1	1	1	6.2	6.2	6.2	31.488	292	1	1	1	1	0.0084268	54847	21809	17695	10940	4403.3	20557	32931	8524.6	5487	4
501	332;333;1024;1260;1747;1748;1749;2253;2622;2623;2881;3038;3064			IPI00641737;IPI00942787;IPI00478493;IPI00431645	IPI00641737;IPI00942787;IPI00478493;IPI00431645	IPI00641737	13;11;10;8	13;11;10;8	5;3;5;3	Haptoglobin;Haptoglobin alpha chain;Haptoglobin beta chain;HP protein;cDNA FLJ31310 fis, clone LIVER1000165, highly similar to Haptoglobin	HP	Haptoglobin;42 kDa protein;haptoglobin isoform 2 preproprotein;HP protein	P00738;Q0VAC5;B3KP77;Q6NSB4;Q6PEJ8	4	13	13	5	12	13	10	12	12	13	10	12	5	5	4	5	24.3	24.3	11.9	46.723	420	14	17	12	15	7.39e-128	101390000	18597000	28454000	15608000	38735000	21872000	34218000	14413000	66749000	4
334	1489;1532;1533;1735;1736;2958;3208			IPI00642984;IPI00218200;IPI00641554;IPI00639976;IPI00646739;IPI00640444	IPI00642984;IPI00218200;IPI00641554;IPI00639976;IPI00646739	IPI00642984	7;7;5;5;4;1	7;7;5;5;4;1	7;7;5;5;4;1	B-cell receptor-associated protein 31, isoform CRA_b;cDNA FLJ33051 fis, clone TRACH1000063, highly similar to B-cell receptor-associated protein 31;cDNA FLJ43643 fis, clone STOMA2008546, highly similar to B-cell receptor-associated protein 31;Putative uncharacterized protein BCAP31;B-cell receptor-associated protein 31 variant;6C6-AG tumor-associated antigen;B-cell receptor-associated protein 31;…	BCAP31;hCG_2004982;BAP31;DXS1357E	B-cell receptor-associated protein 31 isoform a;B-cell receptor-associated protein 31;Putative uncharacterized protein BCAP31;Putative uncharacterized protein BCAP31;Putative uncharacterized protein BCAP31	B3KQ79;C9J0M4;Q53G72;Q53HT6;P51572;C9JQ75;C9JSP1;C9JMD7	6	7	7	7	7	7	4	7	7	7	4	7	7	7	4	7	17.6	17.6	17.6	34.752	313	9	9	4	9	2.39e-15	6388500	3324200	1761600	708080	594520	4726700	2391200	456650	408810	4
503	1238;2458;2774			IPI00643152;IPI00893099;IPI00939442;IPI00942823;IPI00940023;IPI00939753;IPI00830052;IPI00942547;IPI00304925;IPI00845339;IPI00911039;IPI00909073	IPI00643152;IPI00893099;IPI00939442;IPI00942823;IPI00940023;IPI00939753;IPI00830052;IPI00942547;IPI00304925;IPI00845339;IPI00911039;IPI00909073	IPI00643152	3;3;3;3;3;3;3;3;2;2;2;2	1;1;1;1;1;1;1;1;1;1;1;1	1;1;1;1;1;1;1;1;1;1;1;1	cDNA FLJ56386, highly similar to Heat shock 70 kDa protein 1L;cDNA FLJ56517, highly similar to Heat shock 70 kDa protein 1L;Heat shock 70kDa protein 1-like;Heat shock 70kDa protein 1-like variant;Heat shock 70 kDa protein 1-Hom;Heat shock 70 kDa protein 1-like;cDNA, FLJ96225, highly similar to Homo sapiens heat shock 70kDa protein 1-like (HSPA1L), mRNA;Heat shock 70 kDa protein 1/2;Heat shock 70 …	DAAP-21F2.9-001;HSPA1L;HSPA1;HSPA1A;HSPA1B;DADB-333F21.2-001;DADB-333F21.4-001;DAAP-21F2.7-001;DAAP-21F2.8-001;hCG_1820593;hCG_43726;HSP70-1;DADB-333F21.4-002;DAQB-147D11.2-002;DAAP-21F2.8-002;XXbac-BCX40G17.4-002;XXbac-BPG254B15.2-002	cDNA FLJ56386, highly similar to Heat shock 70 kDa protein 1L;Heat shock 70kDa protein 1-like variant;Heat shock 70 kDa protein 1L;Putative uncharacterized protein ENSP00000391505 (Fragment);Putative uncharacterized protein ENSP00000415004 (Fragment);64 kD	B4DI54;B4DXY3;Q53FA3;P34931;B2RCQ9;C9JBP5;C9JHI9;A6NNF5;C9JLY5;P08107;A8K5I0;B4DI39;B4E1S9;Q9UQC1;B4DNT8;B4DWK5;Q59EJ3;B3KTT5;B4DFN9;B4DVU9;B4E388;B4E3B6;Q5SP16;B4DNX1;B4E1T6	12	3	1	1	3	3	3	3	1	1	1	1	1	1	1	1	7.4	3.3	3.3	77.561	705	1	1	1	1	4.27e-39	333530	62799	51282	130430	89024	66534	58731	165850	124690	4
505	2059			IPI00643920;IPI00942979;IPI00792641;IPI00940673;IPI00946864	IPI00643920;IPI00942979;IPI00792641;IPI00940673;IPI00946864	IPI00643920	1;1;1;1;1	1;1;1;1;1	1;1;1;1;1	cDNA FLJ54957, highly similar to Transketolase (EC 2.2.1.1);Transketolase;cDNA FLJ56274, highly similar to Transketolase (EC 2.2.1.1);Transketolase variant;cDNA FLJ36348 fis, clone THYMU2007025, highly similar to TRANSKETOLASE (EC 2.2.1.1);cDNA FLJ53217, highly similar to Transketolase (EC 2.2.1.1);Putative uncharacterized protein DKFZp686J13123	TKT;DKFZp686J13123	cDNA FLJ54957, highly similar to Transketolase;Transketolase;transketolase isoform 2;cDNA FLJ53217, highly similar to Transketolase;Putative uncharacterized protein DKFZp686J13123	B4DE31;P29401;A8K089;B4E022;Q53EM5;B3KSI4;B4DVU1;Q6MZE3	5	1	1	1	1	1	1	1	1	1	1	1	1	1	1	1	2.7	2.7	2.7	68.741	631	1	1	1	1	2.04e-25	261710	27869	13875	158150	61812	22898	10024	179830	96100	4
42	1678			IPI00644311;IPI00004419	IPI00644311;IPI00004419	IPI00644311	1;1	1;1	1;1	cDNA FLJ61089, highly similar to Zinc finger protein 646;Zinc finger protein 646;Zinc finger protein 646, isoform CRA_a	hCG_18384;ZNF646;KIAA0296	zinc finger protein 646;Zinc finger protein 646	B4E3P6;Q8IVD8;O15015	2	1	1	1	0	0	0	1	0	0	0	1	0	0	0	1	0.5	0.5	0.5	200.82	1832				1	0.016715	32555	0	0	0	32555	0	0	0	52060	1
507	142;668;786;848;928;1286;1332;1341;1515;1593;1893;1894;2099;2336;2441;3203			IPI00645452;IPI00909140;IPI00647896;IPI00908770;IPI00007752;IPI00953417;IPI00013475;IPI00031370;IPI00930715;IPI00023598;IPI00930130;IPI00926685;IPI00152453;IPI00013683;IPI00640115;IPI00644620;IPI00909781;IPI00646779;IPI00908469;IPI00641706;IPI00643158;IPI00939129;IPI00174849;IPI00292496;IPI00942474;IPI00514047;IPI00945532;IPI00739915;IPI00877930;IPI00018511;IPI00827736	IPI00645452;IPI00909140;IPI00647896;IPI00908770;IPI00007752;IPI00953417;IPI00013475;IPI00031370;IPI00930715;IPI00023598;IPI00930130;IPI00926685	IPI00645452	16;15;14;12;11;10;9;9;9;9;9;8;7;7;7;6;6;4;4;4;4;3;3;3;3;3;3;3;3;2;1	14;13;12;10;9;10;7;7;7;7;7;6;5;5;5;4;5;2;2;2;2;1;1;1;1;1;1;1;1;0;0	14;13;12;10;9;10;7;7;7;7;7;6;5;5;5;4;5;2;2;2;2;1;1;1;1;1;1;1;1;0;0	cDNA FLJ50617, highly similar to Tubulin beta-7 chain;cDNA, FLJ79164, highly similar to Tubulin beta-7 chain;cDNA, FLJ79215, highly similar to Tubulin beta-7 chain;Tubulin beta polypeptide;Tubulin, beta;Tubulin beta chain;Tubulin beta-5 chain;cDNA FLJ56903, highly similar to Tubulin beta-7 chain;Beta 5-tubulin;Beta-tubulin protein;Tubulin, beta, isoform CRA_a;MRNA encoding beta-tubulin. (from clo…	DADB-118P11.3-003;DAMA-26D6.3-003;DAMC-316D20.4-003;DAQB-47P19.9-003;DASS-191K16.2-003;DAAP-285E11.4-003;TUBB;XXbac-BCX111D4.2-003;XXbac-BPG252P9.4-003;OK/SW-cl.56;TUBB5;DADB-118P11.3-001;DAMA-26D6.3-001;DAMC-316D20.4-001;DAQB-47P19.9-001;DASS-191K16.2-001;DAAP-285E11.4-001;hCG_26016;XXbac-BCX111D4.2-001;XXbac-BPG252P9.4-001;XTP3TPATP1;DADB-118P11.3-002;DAMA-26D6.3-002;DAMC-316D20.4-002;DAQB-47P1…	Tubulin, beta;cDNA FLJ56903, highly similar to Tubulin beta-7 chain;Tubulin, beta;cDNA FLJ53063, highly similar to Tubulin beta-7 chain;Tubulin beta-2C chain;cDNA FLJ53012, highly similar to Tubulin beta-7 chain;Tubulin beta-2A chain;Tubulin beta-2B chain;	B4DQN9;B7ZAF0;B7ZAK1;Q5JP53;P07437;B4DY90;Q5SU16;Q6LC01;B4DXZ5;Q1KSF8;Q5ST81;Q6P602;Q96B85;Q9BUU9;B4DMU8;P68371;Q8IWP6;Q8IZ29;Q8N6N5;Q96HX0;A4UCU2;B4DMJ5;Q13885;A5D906;A5D907;Q9BVA1;A1L195;A8K068;B4E052;B7Z4N1;O43209;Q9UGA2;B2R6L0;P04350;B4DE77;A4UCT2;B3KML9;B4DJ43	31	16	14	14	16	16	15	16	14	14	13	14	14	14	13	14	48.6	43.9	43.9	47.766	426	18	17	17	18	9.69e-208	66458000	14846000	14453000	26178000	10981000	20911000	22318000	19866000	17501000	4
508	167;168;319;480;749;3129			IPI00646083;IPI00744689;IPI00871885;IPI00472073;IPI00472284;IPI00472767;IPI00655604;IPI00718924;IPI00744375;IPI00746605;IPI00930288;IPI00930056;IPI00930472;IPI00930062;IPI00930546;IPI00930152;IPI00930712;IPI00930165;IPI00930577;IPI00930094;IPI00930483;IPI00930534;IPI00930179;IPI00930703;IPI00930479;IPI00472434;IPI00472282;IPI00827612;IPI00471986;IPI00472138;IPI00954221;IPI00947422;IPI00954092;IPI…	IPI00646083;IPI00744689;IPI00871885;IPI00472073;IPI00472284;IPI00472767;IPI00655604;IPI00718924;IPI00744375;IPI00746605;IPI00930288;IPI00930056;IPI00930472;IPI00930062;IPI00930546;IPI00930152;IPI00930712;IPI00930165;IPI00930577;IPI00930094;IPI00930483;IPI00930534;IPI00930179;IPI00930703;IPI00930479;IPI00472434;IPI00472282;IPI00827612;IPI00471986;IPI00472138;IPI00954221;IPI00947422;IPI00954092;IPI…	IPI00646083	6;6;6;5;5;5;5;5;5;5;5;5;5;5;5;5;5;5;5;5;5;5;5;5;5;4;4;4;4;4;4;4;4;4;4;4;4;4;4;4;4;4;4;4;4;4;4;4;4;4;4;4;4;4;4;4;4;4;4;4;4;4;4;4;4;4;4;4;4;4;4;4;4;4;3;3;3;3;3;3;3;3;3;3;3;3;3;3;3;3;3;3;3;3;3;3;3;3;3;3;3;3;3;3;3;3;2;2;2;2;2;2;2;2;2;2;1;1;1;1;1;1;1;1;1;1;1;1	3;3;3;2;2;2;2;2;2;2;2;2;2;2;2;2;2;2;2;2;2;2;2;2;2;2;2;2;2;2;2;2;1;2;2;2;2;2;2;2;2;2;2;2;2;2;2;2;2;2;2;2;2;2;2;2;2;2;2;2;2;2;2;2;2;2;2;2;2;2;2;2;2;2;1;1;1;1;1;1;1;1;1;1;1;1;1;1;1;1;1;1;1;1;1;1;1;1;1;1;1;1;1;1;1;1;0;1;0;1;0;1;1;1;0;0;0;0;0;0;0;0;0;0;0;0;0;0	0;0;0;0;0;0;0;0;0;0;0;0;0;0;0;0;0;0;0;0;0;0;0;0;0;0;0;0;0;0;0;0;0;0;0;0;0;0;0;0;0;0;0;0;0;0;0;0;0;0;0;0;0;0;0;0;0;0;0;0;0;0;0;0;0;0;0;0;0;0;0;0;0;0;0;0;0;0;0;0;0;0;0;0;0;0;0;0;0;0;0;0;0;0;0;0;0;0;0;0;0;0;0;0;0;0;0;0;0;0;0;0;0;0;0;0;0;0;0;0;0;0;0;0;0;0;0;0	HLA class I histocompatibility antigen, B-15 alpha chain;MHC class I antigen B*15;HLA class I histocompatibility antigen, B-35 alpha chain;MHC class I antigen B*35;MHC class I antigen;MHC class I;MHC Class I antigen;MHC class I anitgen;HLA-B55;HLA-B protein;MHC class I antigen HLA-B;MHC class I HLA-B antigen;MHC class I HLA-C antigen;MHC class I antigen B*5108;HLA-B35;MHC class I HLA-C heavy chai…	HLAB;HLA-B;HLA;HLA-Cw;B*35;B*15;Cw*03;B-3501;HLA-C;HLA-Bw62.3;HLA-B*51IM;HLA-B18;HLA-B*15MD;HLA-B*3512;HLA-B*35JAC;HLA-B51;B-1510;HLA-B*5101 variant;HLA-B*1522;HLA-A;HLA-Bw62.5;HLA-Bw62.1;HLA-Bw62.4;HLA-B52;HLA-B*;HLA-B52v;HLA-B*35SRE;HLA-B*3531;CDABP0067;HLA-B*58;HLA-B57;HLA-B41;HLA -B;HLA-B*1805;HLA-B35;HLA-B*18 variant;HLA-B*1513;DKFZp686N10220;HLA-B27;HLA B;HLA-B*27;DAMC-153L10.1-003;HLA-B15;…	HLA class I histocompatibility antigen, B-15 alpha chain;HLA class I histocompatibility antigen, B-52 alpha chain;40 kDa protein;HLA class I histocompatibility antigen, B-59 alpha chain;HLA class I histocompatibility antigen, B-56 alpha chain;HLA class I h	P30464;P30685;A0FIZ4;A0FKC4;A0JCS1;A0JKD1;A0MSS3;A0PCH6;A1EC34;A1IVL5;A1YRJ1;A1Z288;A1Z291;A2IAT8;A2RQE1;A2TEL9;A2TEM1;A2TJS4;A2VBZ9;A3EYJ3;A3F720;A3FG53;A3FG54;A3FG55;A3FG56;A3FG57;A3FG64;A3FG65;A3FG66;A3FP42;A3RLM7;A4FSH4;A4GX62;A4URH0;A4USG3;A4UYK5;A4ZVL4;A4ZW43;A5CLI0;A5HC28;A5HKN6;A5HM76;A5JSG4;A5JSG7;A5PHT8;A5PI54;A6BML9;A6H567;A6H579;A6MWD9;A6N5Y9;A6N842;A6Q0R2;A7LB38;A7MAK1;A7MAP7;A7UM87;…	128	6	3	0	4	6	6	5	1	3	3	2	0	0	0	0	25.1	17.7	0	40.388	362	1	4	4	2	1.07e-104	15490000	4553800	5426000	4432200	1078400	7169100	5826900	4046500	1717200	4
509	310;2778;2894			IPI00646304;IPI00791367	IPI00646304	IPI00646304	3;1	3;1	3;1	Cyclophilin B;CYP-S1;Peptidyl-prolyl cis-trans isomerase B;Rotamase B;S-cyclophilin	CYPB;PPIB	Peptidyl-prolyl cis-trans isomerase B	P23284	2	3	3	3	3	2	3	3	3	2	3	3	3	2	3	3	14.8	14.8	14.8	23.742	216	3	2	3	3	1.35e-16	1922900	570390	174930	804260	373290	1100300	227530	576310	415740	4
374	336			IPI00646556;IPI00291328;IPI00412122	IPI00646556;IPI00291328;IPI00412122	IPI00646556	1;1;1	1;1;1	1;1;1	NADH dehydrogenase [ubiquinone] flavoprotein 2, mitochondrial;NADH-ubiquinone oxidoreductase 24 kDa subunit;cDNA FLJ78041, highly similar to Homo sapiens NADH dehydrogenase (ubiquinone) flavoprotein 2, 24kDa (NDUFV2), mRNA;NDUFV2 protein;cDNA, FLJ92411, Homo sapiens NADH dehydrogenase (ubiquinone) flavoprotein 2, 24kDa(NDUFV2), mRNA;NADH dehydrogenase (Ubiquinone) flavoprotein 2, 24kDa;24-kDa sub…	NDUFV2;hCG_1994226	28 kDa protein;NADH dehydrogenase [ubiquinone] flavoprotein 2, mitochondrial;Putative uncharacterized protein ENSP00000343430 (Fragment)	P19404;A8K750;Q6IB76;Q6IPW4;Q6LEN9;Q9UEH5;A6NK33	3	1	1	1	1	1	1	1	1	1	1	1	1	1	1	1	4	4	4	27.907	252	1	1	1	1	0.0023301	149900	61136	54193	19684	14890	51301	106830	13655	16519	4
510	55;63;177;405;442;628;680;719;1158;1197;2129;2143;2168;2284;2379;2608;2649;2741;2887;2888;2972;2987;3015;3054;3177;3178			IPI00646773;IPI00796316;IPI00641047	IPI00646773;IPI00796316	IPI00646773	26;25;9	1;1;1	1;1;1	Actin-depolymerizing factor;AGEL;Brevin;Gelsolin;cDNA FLJ38961 fis, clone NT2RI2000276, highly similar to Gelsolin;cDNA FLJ43831 fis, clone TESTI4005534, highly similar to Gelsolin;Gelsolin (Amyloidosis, Finnish type);Gelsolin (Amyloidosis, Finnish type), isoform CRA_a;Putative uncharacterized protein GSN;cDNA FLJ55803, highly similar to Gelsolin;cDNA FLJ53698, highly similar to Gelsolin;cDNA FLJ…	GSN;hCG_27454;RP11-477J21.1-013;RP11-477J21.1-010	Isoform 2 of Gelsolin;cDNA FLJ53327, highly similar to Gelsolin	P06396-2;P06396;A2A418;B7Z4U6;B7Z992;B7Z2X4;Q5T0H8	3	26	1	1	26	26	23	25	1	1	1	1	1	1	1	1	45	1.2	1.2	80.64	731	2	2	2	2	0	9130400	2261000	2219500	3125100	1524800	2708800	2931600	3235800	2324400	4
512	166;318;749;2341;2582;2824;3129;3155			IPI00647457;IPI00647634;IPI00794678;IPI00472112;IPI00472448;IPI00472736;IPI00954550;IPI00921503	IPI00647457;IPI00647634;IPI00794678;IPI00472112;IPI00472448	IPI00647457	8;8;8;6;6;3;2;1	2;2;2;1;1;0;0;0	0;0;0;0;0;0;0;0	MHC class I antigen;cDNA, FLJ93604, highly similar to Homo sapiens major histocompatibility complex, class I, A (HLA-A),mRNA;cDNA FLJ51109, highly similar to HLA class I histocompatibility antigen, A-3 alpha chain;cDNA, FLJ79094, highly similar to HLA class I histocompatibility antigen, A-30alpha chain;cDNA, FLJ79097, highly similar to HLA class I histocompatibility antigen, A-30alpha chain;Major…	HLA-A;XXbac-BPG309N1.2-002;HLAA;HLA;HLA-ABC;HLA-B;HLA-All;XXbac-BPG309N1.2-003;HLA-A*24;HLA-A*03	Major histocompatibility complex, class I, A;HLA class I histocompatibility antigen, A-3 alpha chain;MHC class I antigen;Isoform 2 of HLA class I histocompatibility antigen, A-11 alpha chain;Isoform 1 of HLA class I histocompatibility antigen, A-11 alpha c	A1Z1D7;A9YWM1;B2R7U3;B4DVB9;B7ZA80;C5IWY0;Q5SRN5;P04439;A0SXS8;A7DZQ5;B1PKY1;B2MVI0;B3V8R2;B4DVC4;B4E2X4;C5IWZ2;D0V0C4;O19689;Q29840;Q2A688;Q2LC93;Q6IVJ9;Q7YPW4;Q95J07;Q9UM27;A0JHM7;A0MVS8;A0N0V9;A0PBY5;A0PFV5;A0ZXY8;A1DZU2;A1E124;A1E125;A1ED57;A2Q117;A2TJS5;A2VBX5;A3FEL8;A3RKJ6;A3RKJ9;A4L9U0;A4URF2;A4USG8;A5I8L2;A5PHP7;A5PHT4;A5PHT9;A5Z1D4;A6H583;A6N8R8;A7E1B9;A7E1C1;A7L3S7;A7L5K9;A7L858;A7LB37;…	8	8	2	0	7	5	6	7	1	0	1	2	0	0	0	0	30.2	8.1	0	41.368	371	1		1	2	5.37e-100	930760	401670	0	231720	297360	661540	0	217880	313700	3
490	287;622;1312;1444;2016;2256;2707;3167			IPI00647915;IPI00550363;IPI00644531;IPI00922126	IPI00647915;IPI00550363;IPI00644531	IPI00647915	8;8;8;1	8;8;8;1	8;8;8;1	SM22-alpha homolog;Transgelin-2	CDABP0035;KIAA0120;TAGLN2	24 kDa protein;Transgelin-2;21 kDa protein	P37802	4	8	8	8	8	8	8	8	8	8	8	8	8	8	8	8	39.5	39.5	39.5	24.454	220	10	10	10	10	5.62e-200	17771000	2006100	1941500	9431800	4391600	1793100	1853900	11059000	6714400	4
513	547;730;1482;1598;1677;2394;2917;2966;3047	61	56	IPI00654755;IPI00884107;IPI00796636;IPI00815947	IPI00654755;IPI00884107;IPI00796636	IPI00654755	9;7;7;2	9;7;7;2	3;2;2;1	Beta-globin;Hemoglobin beta chain;Hemoglobin subunit beta;LVV-hemorphin-7;Hemoglobin beta globin chain;Beta-globin Tacoma variant;Beta-globin Showa Yakushiji variant;Beta globin;Mutant beta-globin;Hemoglobin beta;Beta globin chain;Mutant hemoglobin beta chain;Hemoglobin beta chain variant Hb.Sinai-Bel Air;Hemoglobin beta chain variant Hb-I_Toulouse;Mutant beta globin;Hemoglobin beta subunit varia…	HBB	Hemoglobin subunit beta;Beta-globin gene from a thalassemia patient;Hemoglobin (Fragment)	P68871;A1YZ08;B2M0Y1;B2M1S6;B2M1S7;B3VL05;B3VL17;B3VL31;B3VL86;C8C504;Q3LR79;Q3Y9I8;Q4JLR8;Q4TWB7;Q4TZM4;Q52MT0;Q6J1Z7;Q6J1Z8;Q6V0K9;Q6VFQ5;Q6VFQ6;Q8IUL9;Q8IZI0;Q9BWU5;Q9BWV6;Q9GZL9;Q9UK54;Q14473;A9YUX2;B3VL12;B5ANL9;O95408;O95412;Q0Z944;Q14484;Q7Z2K5;Q7Z7B3;Q86VF0;Q9BXA2;Q9H1I6;Q9HAR8;Q9UBV6;Q9UP81	4	9	9	3	9	9	8	9	9	9	8	9	3	3	2	3	68.7	68.7	29.9	15.998	147	18	18	13	16	1.01e-129	559470000	209460000	155320000	109260000	85432000	270060000	193640000	102480000	136160000	4
173	277;354;488;812;1077			IPI00657670;IPI00021857	IPI00657670;IPI00021857	IPI00657670	5;5	5;5	5;5	Apolipoprotein C-III variant 1;Apolipoprotein C3;Apolipoprotein C-III;Apolipoprotein C-III variant 2;Apolipoprotein C-III variant 3;Apolipoprotein C-III, isoform CRA_a	APOC3;hCG_41334	Apolipoprotein C-III variant 1;Apolipoprotein C-III	B0YIW2;P02656;A3KPE2	2	5	5	5	5	5	5	5	5	5	5	5	5	5	5	5	47	47	47	12.815	117	6	7	6	7	1.53e-99	518710000	131960000	137650000	120440000	128660000	168560000	189940000	107820000	199460000	4
515	59;234;235;936;1381;1517;2199;2200;2324	62;63	927;929	IPI00740545;IPI00935352	IPI00740545;IPI00935352	IPI00740545	9;9	1;1	1;1			similar to protein expressed in prostate, ovary, testis, and placenta 2 isoform 2;similar to protein expressed in prostate, ovary, testis, and placenta 2		2	9	1	1	8	9	7	8	1	1	1	1	1	1	1	1	7.1	2.1	2.1	121.28	1075	1	1	1	1	2.76e-47	4226700	1439100	1538400	455370	793880	1803900	2187300	301790	1184200	4
516	164;318;479;749;1084;1484;2582;3091;3129			IPI00742968;IPI00816779;IPI00923410;IPI00954499;IPI00954537;IPI00954502;IPI00954549;IPI00954577;IPI00472151;IPI00954493;IPI00954598	IPI00742968;IPI00816779;IPI00923410;IPI00954499;IPI00954537;IPI00954502;IPI00954549;IPI00954577;IPI00472151;IPI00954493;IPI00954598	IPI00742968	9;9;7;7;7;7;7;7;6;5;5	5;5;4;4;4;4;4;4;2;2;2	2;2;2;2;2;2;2;2;0;0;0	Aw-24;HLA class I histocompatibility antigen, A-24 alpha chain;HLA class I histocompatibility antigen, A-9 alpha chain;MHC class I antigen A*24;HLA-A protein;Major histocompatibility complex, class I, A;MHC class I antigen;MHC leukocyte antigen;Truncated MHC class I antigen;Leukocyte antigen;MHC class I antigen precusor;MHC Class I antigen;MHC class I HLA-A;HLA-A*24var;Heavy chain of HLA-A antige…	HLA-A;HLAA;HLA-A*2410;HLA-A*24;HLA-A24AK;HLA-B	HLA class I histocompatibility antigen, A-24 alpha chain;Leukocyte antigen;Truncated MHC class I antigen;MHC class I antigen (Fragment);MHC class I antigen (Fragment);MHC Class I Antigen (Fragment);MHC class I HLA-A (Fragment);MHC class I HLA-A (Fragment);	P05534;Q95J06;A2RQE0;A2VBZ7;A2VC06;A4GWZ0;A4GWZ1;A4URG8;A5PHT7;A6YT92;A7MAP3;B0FWH0;B0LL97;B2DFH4;B2DFH5;B2DFH6;B2DFV0;B2DFW8;B2NIY8;B2NJ13;B3IYE6;B3VE20;B5A9M9;B9VJL7;C1KBJ6;C3VAL4;C4PFW7;C6L836;C7EW70;C7EW71;O15506;Q0E7X5;Q14SN2;Q1EJP6;Q1EPW2;Q25BN7;Q2L4F0;Q2PP85;Q3YBM1;Q4W5U0;Q4ZG93;Q5D1X1;Q5NTA9;Q6AW25;Q6F3E2;Q6IVJ7;Q6IVJ8;Q6L675;Q8HWT0;Q95IG6;Q95IZ1;Q9BCN8;Q9MY72;A0PFT8;A0PFV6;A0SY06;A1E2T0;…	11	9	5	2	8	5	4	4	5	1	2	1	2	0	0	0	30.1	15.3	3.3	40.688	365	5	1	2	1	1.1e-104	10865000	6119000	1900100	2088100	757550	8351400	2267900	1695900	870420	4
256	2745			IPI00743293;IPI00398795;IPI00412154;IPI00028946	IPI00743293;IPI00398795;IPI00412154;IPI00028946	IPI00743293	1;1;1;1	1;1;1;1	1;1;1;1	Neuroendocrine-specific protein-like 2;Neuroendocrine-specific protein-like II;Reticulon-3;cDNA FLJ54729, highly similar to Homo sapiens reticulon 3 (RTN3), transcript variant 2, mRNA;cDNA FLJ60267, highly similar to Homo sapiens reticulon 3 (RTN3), transcript variant 2, mRNA;cDNA FLJ50772, highly similar to Reticulon-3	ASYIP;NSPL2;RTN3	Isoform 1 of Reticulon-3;Isoform 2 of Reticulon-3;Isoform 4 of Reticulon-3;Isoform 3 of Reticulon-3	O95197-1;O95197;B7Z8W8;O95197-2;B7Z3E3;O95197-4;O95197-3;B7Z361	4	1	1	1	1	1	1	1	1	1	1	1	1	1	1	1	1.1	1.1	1.1	112.61	1032	1	1	1	1	9.74e-09	4771900	2045400	1419400	839270	467780	2789800	1901500	660000	566130	4
464	2281			IPI00743673;IPI00477120;IPI00885001;IPI00876978;IPI00418714	IPI00743673;IPI00477120;IPI00885001;IPI00876978;IPI00418714	IPI00743673	1;1;1;1;1	1;1;1;1;1	1;1;1;1;1	Epididymis luminal protein 185;PH domain-containing protein C10orf81	C10orf81	Isoform 5 of PH domain-containing protein C10orf81;Isoform 1 of PH domain-containing protein C10orf81;Isoform 2 of PH domain-containing protein C10orf81;Isoform 3 of PH domain-containing protein C10orf81;Isoform 4 of PH domain-containing protein C10orf81	Q5SXH7-5;Q5SXH7;Q5SXH7-1;Q5SXH7-2;Q5SXH7-3;Q5SXH7-4	5	1	1	1	1	1	1	1	1	1	1	1	1	1	1	1	3.2	3.2	3.2	52.535	465	1	1	1	1	0.023577	9235200	5018200	2275800	1251000	690190	6888100	3376800	615160	520550	4
4	32;242;373;462;758;798;1124;1127;1459;1470;1483;1487;1488;1843;1857;1862;2167;2279;2327;2328;2329;2482;2795;2854;2855;2978;3205;3206	2;3	353;572	IPI00745872;CON__P02768-1;IPI00022434;IPI00908876;IPI00878517;IPI00953582;IPI00384697;IPI00216773;IPI00878282;CON__P02769	IPI00745872;CON__P02768-1;IPI00022434;IPI00908876;IPI00878517;IPI00953582;IPI00384697;IPI00216773	IPI00745872	28;28;26;26;24;19;19;15;11;7	28;28;26;26;24;19;19;15;11;7	28;28;26;26;24;19;19;15;11;7	Serum albumin;cDNA FLJ78413, highly similar to Homo sapiens albumin, mRNA;Putative uncharacterized protein ALB;cDNA, FLJ95666, highly similar to Homo sapiens albumin (ALB), mRNA;cDNA FLJ54371, highly similar to Serum albumin;cDNA FLJ50830, highly similar to Serum albumin;Albumin, isoform CRA_k;ALB protein	ALB;GIG20;GIG42;PRO0903;PRO1708;PRO2044;PRO2619;PRO2675;UNQ696/PRO1341;hCG_14967	Isoform 1 of Serum albumin;>P02768-1 SWISS-PROT:P02768-1 Tax_Id=9606 Gene_Symbol=ALB Isoform 1 of Serum albumin precursor;Putative uncharacterized protein ALB;cDNA FLJ50830, highly similar to Serum albumin;Putative uncharacterized protein ALB;Putative unch	P02768-1;P02768;A8K9P0;A6NBZ8;B2RBS8;B4DPP6;Q56G89;B4DPR2;B7WNR0;C9JKR2;P02768-2;Q8IUK7	10	28	28	28	27	28	26	27	27	28	26	27	27	28	26	27	28.7	28.7	28.7	69.366	609	82	64	49	65	0	2415100000	530200000	580350000	191250000	1113300000	493680000	583610000	97096000	2197500000	4
517	76;335;737;1594;1882;2030;2589;2853;3135;3151;3235			IPI00746165;IPI00873622;IPI00939854;IPI00903292;IPI00908482;IPI00909688;IPI00940664;IPI00556374;IPI00747236	IPI00746165;IPI00873622;IPI00939854;IPI00903292	IPI00746165	11;10;8;6;3;1;1;1;1	11;10;8;6;3;1;1;1;1	11;10;8;6;3;1;1;1;1	Actin-interacting protein 1;NORI-1;WD repeat-containing protein 1;Putative uncharacterized protein WDR1;WD repeat domain 1, isoform CRA_a;WD repeat-containing protein 1 isoform 1 variant;cDNA FLJ45763 fis, clone N1ESE2000698, highly similar to WD repeat protein 1;cDNA FLJ58303, highly similar to WD repeat protein 1	WDR1;hCG_19377	Isoform 1 of WD repeat-containing protein 1;Putative uncharacterized protein WDR1;cDNA FLJ45763 fis, clone N1ESE2000698, highly similar to WD repeat protein 1;Isoform 2 of WD repeat-containing protein 1	O75083-1;O75083;A8MVA9;Q53GN4;Q53H17;Q59ER5;B3KXN4;O75083-3;B4DY05	9	11	11	11	10	11	11	10	10	11	11	10	10	11	11	10	30	30	30	66.193	606	13	13	12	13	9.53e-81	31398000	4573300	4325500	14350000	8148700	4325600	4277200	15455000	14511000	4
177	1360;1671;1673;2385			IPI00746655;IPI00022143;IPI00902463	IPI00746655;IPI00022143;IPI00902463	IPI00746655	4;4;3	4;4;3	4;4;3	Extended synaptotagmin-1;Membrane-bound C2 domain-containing protein;cDNA FLJ12728 fis, clone NT2RP2000040, highly similar to Protein FAM62A;cDNA FLJ46898 fis, clone UTERU3022168, highly similar to Protein FAM62A	ESYT1;FAM62A;KIAA0747;MBC2	Isoform 2 of Extended synaptotagmin-1;Isoform 1 of Extended synaptotagmin-1;cDNA FLJ46898 fis, clone UTERU3022168, highly similar to Protein FAM62A	Q9BSJ8-2;Q9BSJ8;B3KMV5;Q9BSJ8-1;B3KY56	3	4	4	4	4	3	3	3	4	3	3	3	4	3	3	3	6.2	6.2	6.2	124	1114	6	5	4	3	2.05e-17	1046100	430750	292780	235070	87461	621710	452020	139480	65604	4
326	1243			IPI00748895;IPI00747536;IPI00748330;IPI00216697;IPI00654646;IPI00748074;IPI00374973;IPI00744408;IPI00748439;IPI00744986;IPI00749301;IPI00297532;IPI00744895;IPI00745348;IPI00747552;IPI00744846;IPI00646300	IPI00748895;IPI00747536;IPI00748330;IPI00216697;IPI00654646;IPI00748074;IPI00374973;IPI00744408;IPI00748439;IPI00744986;IPI00749301;IPI00297532;IPI00744895;IPI00745348;IPI00747552;IPI00744846;IPI00646300	IPI00748895	1;1;1;1;1;1;1;1;1;1;1;1;1;1;1;1;1	1;1;1;1;1;1;1;1;1;1;1;1;1;1;1;1;1	1;1;1;1;1;1;1;1;1;1;1;1;1;1;1;1;1	Ankyrin-1;Ankyrin-R;Erythrocyte ankyrin;cDNA FLJ44690 fis, clone BRACE3013418, highly similar to Homo sapiens ankyrin 1, erythrocytic (ANK1), transcript variant 2, mRNA;Ankyrin	ANK;ANK1;hANK1	Isoform Er13 of Ankyrin-1;Isoform Er11 of Ankyrin-1;Isoform Br21 of Ankyrin-1;Isoform Er1 of Ankyrin-1;Isoform Er5 of Ankyrin-1;Isoform Er15 of Ankyrin-1;Isoform Er3 of Ankyrin-1;Isoform Er7 of Ankyrin-1;Isoform Er14 of Ankyrin-1;Isoform Er9 of Ankyrin-1;I	P16157-14;P16157;P16157-12;P16157-21;P16157-1;P16157-3;P16157-16;P16157-5;P16157-8;P16157-15;P16157-10;P16157-13;P16157-4;P16157-7;P16157-6;P16157-9;P16157-11;B3KX39;Q9UMG4;P16157-2	17	1	1	1	1	1	1	1	1	1	1	1	1	1	1	1	0.8	0.8	0.8	217.48	1983	2	2	2	2	8.15e-12	222200	97193	44322	30699	49990	144200	56149	23811	62004	4
521	167;318;479;749;1084;1111;2583;2824;3130			IPI00760554;IPI00473006;IPI00787992;IPI00939851	IPI00760554	IPI00760554	9;3;3;3	1;0;1;1	0;0;0;0	Aw-69;HLA class I histocompatibility antigen, A-28 alpha chain;HLA class I histocompatibility antigen, A-69 alpha chain;MHC class I antigen A*69;MHC class I antigen	HLA-A;HLAA	HLA class I histocompatibility antigen, A-69 alpha chain	P10316;C5IWY8	4	9	1	0	5	9	4	6	1	1	1	1	0	0	0	0	31.2	3.8	0	40.976	365	1	1	1	1	4.43e-85	2608300	892930	562350	643440	509600	1074900	731780	640360	826690	4
522	963;2097;3251			IPI00782983;IPI00783451;IPI00783689;IPI00884183;IPI00382500;IPI00943690;IPI00829812;IPI00937119;IPI00936563;IPI00937964;IPI00884078;IPI00936661;IPI00937583;IPI00937669;IPI00914985;IPI00915820;IPI00829752;IPI00854667;IPI00854841;IPI00007899;IPI00827690;IPI00827733;IPI00894177	IPI00782983;IPI00783451;IPI00783689;IPI00884183;IPI00382500	IPI00782983	3;3;3;3;2;1;1;1;1;1;1;1;1;1;1;1;1;1;1;1;1;1;1	1;1;1;1;0;0;0;0;0;0;0;0;0;0;0;0;0;0;0;0;0;0;0	1;1;1;1;0;0;0;0;0;0;0;0;0;0;0;0;0;0;0;0;0;0;0	Immunglobulin heavy chain variable region;Imunoglobulin heavy chain;Ig heavy chain V-III region GAL	VH	hypothetical protein XP_002347522;Immunglobulin heavy chain variable region (Fragment);Immunglobulin heavy chain variable region (Fragment);Imunoglobulin heavy chain (Fragment);Ig heavy chain V-III region GAL	Q0ZCH4;Q0ZCH7;Q0ZCI8;Q0ZCJ0;Q0ZCJ2;Q0ZCJ4;Q0ZCJ5;Q0ZCF9;Q0ZCG0;Q9ULB6;P01781	23	3	1	1	2	3	3	3	0	1	1	1	0	1	1	1	15.7	4.1	4.1	18.58	172		1	1	1	6.3e-37	893160	0	136260	394140	362760	0	113370	373010	666040	3
524	683;963;2097			IPI00783287;IPI00555872;IPI00939521	IPI00783287;IPI00555872;IPI00939521	IPI00783287	3;2;2	2;1;1	0;0;0	Immunglobulin heavy chain variable region;Myosin-reactive immunoglobulin heavy chain variable region		Immunglobulin heavy chain variable region (Fragment);Myosin-reactive immunoglobulin heavy chain variable region (Fragment);Putative uncharacterized protein ENSP00000346720 (Fragment)	Q0ZCH9;Q9UL91;A6NG04	3	3	2	0	3	3	3	3	2	2	2	2	0	0	0	0	32.2	23.1	0	13.436	121	3	3	3	3	2.83e-108	51795000	1738200	2781400	42339000	4935900	787510	1572800	49691000	3920300	4
525	57;161;241;268;295;387;435;436;516;620;629;686;697;855;956;1010;1059;1060;1088;1162;1232;1271;1303;1330;1336;1380;1437;1468;1547;1684;1712;1816;2108;2154;2166;2171;2194;2236;2255;2263;2295;2314;2333;2363;2413;2414;2439;2443;2499;2509;2541;2592;2629;2692;2724;2786;2884;2925;2986;2993;3066;3103;3157;3221;3247;3250;3277;3278			IPI00783987;IPI00942927;IPI00739237	IPI00783987;IPI00942927	IPI00783987	68;45;9	68;45;9	9;4;8	C3 and PZP-like alpha-2-macroglobulin domain-containing protein 1;C3a anaphylatoxin;Complement C3;Complement C3 alpha chain;Complement C3 beta chain;Complement C3b alpha' chain;Complement C3c alpha' chain fragment 1;Complement C3c alpha' chain fragment 2;Complement C3d fragment;Complement C3dg fragment;Complement C3f fragment;Complement C3g fragment;cDNA FLJ60818, highly similar to Complement C3;…	C3;CPAMD1	Complement C3 (Fragment);cDNA FLJ57339, highly similar to Complement C3	P01024;A7E236;B4DR57;B4E216;Q6LDJ0	3	68	68	9	65	67	66	68	65	67	66	68	9	9	9	9	50.9	50.9	8	187.15	1663	85	88	86	89	0	379640000	62390000	45425000	185260000	86565000	72333000	47961000	194930000	143330000	4
277	473;655			IPI00784114;IPI00032267	IPI00784114;IPI00032267	IPI00784114	2;2	2;2	2;2	Putative uncharacterized protein RASA3;GAP1(IP4BP);Ins P4-binding protein;Ras GTPase-activating protein 3;cDNA FLJ58396, highly similar to Ras GTPase-activating protein 3	RASA3	Putative uncharacterized protein RASA3;Ras GTPase-activating protein 3	A8MSJ7;Q14644;B7Z2N6	2	2	2	2	2	2	2	2	2	2	2	2	2	2	2	2	2.7	2.7	2.7	96.543	841	2	2	2	2	1.27e-12	644690	197370	169160	197280	80876	258610	229590	179160	119190	4
526	408;1085;1218;1288;1297;1339;1466;1752;1847;1991;2605;2708;2782;2873;2875			IPI00784154;IPI00917575;IPI00880053;IPI00915941;IPI00917983;IPI00076042;IPI00917686;IPI00916653;IPI00916167	IPI00784154;IPI00917575	IPI00784154	15;14;4;4;4;3;2;2;1	15;14;4;4;4;3;2;2;1	15;14;4;4;4;3;2;2;1	60 kDa chaperonin;60 kDa heat shock protein, mitochondrial;Chaperonin 60;Heat shock protein 60;HuCHA60;Mitochondrial matrix protein P1;P60 lymphocyte protein;Mitochondrial heat shock 60kD protein 1 variant 1;cDNA FLJ54912, highly similar to 60 kDa heat shock protein, mitochondrial;cDNA FLJ51028, highly similar to 60 kDa heat shock protein, mitochondrial;cDNA FLJ54373, highly similar to 60 kDa hea…	HSP60;HSPD1	60 kDa heat shock protein, mitochondrial;cDNA FLJ51046, highly similar to 60 kDa heat shock protein, mitochondrial	P10809;B3GQS7;B7Z4F6;B7Z532;B7Z597;Q53QD5;Q96RI4;B7Z5E7;C9JCQ4	9	15	15	15	15	14	11	15	15	14	11	15	15	14	11	15	40	40	40	61.054	573	15	14	11	15	2.75e-95	15688000	6500300	5459500	2373500	1354600	8139800	7776100	2130800	1494500	4
355	532;577;909;1126			IPI00784258;IPI00220249;IPI00302679;IPI00929158;IPI00894247;IPI00893975;IPI00893273;IPI00893691;IPI00893279	IPI00784258;IPI00220249;IPI00302679;IPI00929158;IPI00894247;IPI00893975;IPI00893273;IPI00893691	IPI00784258	4;4;4;4;4;4;4;2;1	4;4;4;4;4;4;4;2;1	4;4;4;4;4;4;4;2;1	Latent-transforming growth factor beta-binding protein 1;Transforming growth factor beta-1-binding protein 1;LTBP1 protein;cDNA FLJ51010, highly similar to Latent-transforming growth factor beta-binding protein, isoform 1S;Putative uncharacterized protein LTBP1;cDNA FLJ51055, highly similar to Latent-transforming growth factor beta-binding protein, isoform 1S;cDNA FLJ51078, highly similar to Late…	LTBP1	Isoform Long of Latent-transforming growth factor beta-binding protein 1;173 kDa protein;Isoform Short of Latent-transforming growth factor beta-binding protein 1;latent transforming growth factor beta binding protein 1 isoform 4 precursor;Isoform 3 of Lat	Q14766-1;Q14766;Q14766-2;B7ZLY3;C9J9Y0;Q14766-3;B4DNR7;C9JD84;B4DRF7;B4DST8;B4DZD1;C9JCG4;C9JDW2	9	4	4	4	4	4	3	3	4	4	3	3	4	4	3	3	3	3	3	186.87	1722	4	4	3	3	3.71e-28	6196800	2884200	1862400	928890	521230	3704000	2534000	774470	674020	4
530	281;2097;2198;3109;3204			IPI00784950;IPI00642017;IPI00784830;IPI00784758;IPI00785067;IPI00940245;IPI00641229;IPI00893853;IPI00423461;IPI00894384	IPI00784950;IPI00642017;IPI00784830;IPI00784758;IPI00785067;IPI00940245;IPI00641229;IPI00893853	IPI00784950	5;4;4;4;4;4;4;3;2;2	1;1;1;1;1;1;1;1;1;1	1;1;1;1;1;1;1;1;1;1	Putative uncharacterized protein DKFZp686L19235;Putative uncharacterized protein DKFZp686C02218;cDNA FLJ41981 fis, clone SMINT2011888, highly similar to Protein Tro alpha1 H,myeloma;Putative uncharacterized protein DKFZp686M08189;IGH@ protein;Immunoglobulin heavy chain variant;Ig alpha-2 chain C region	DKFZp686L19235;DKFZp686C02218;DKFZp686M08189;IGH@;IGHA2	Putative uncharacterized protein DKFZp686L19235;Putative uncharacterized protein DKFZp686C02218 (Fragment);cDNA FLJ41981 fis, clone SMINT2011888, highly similar to Protein Tro alpha1 H,myeloma;Putative uncharacterized protein DKFZp686M08189;IGH@ protein;Im	Q6MZV6;Q7Z374;Q6ZVX0;Q6MZX9;Q6P089;Q9NPP6;P01877;A6NE94	10	5	1	1	5	5	5	5	1	1	1	1	1	1	1	1	12.5	3.1	3.1	51.639	479	1	1	1	1	3.36e-83	1755400	259260	222150	882210	391810	195630	181200	1062700	673380	4
310	3104			IPI00788923;IPI00184851;IPI00792485;IPI00946506;IPI00793350;IPI00795607;IPI00946314	IPI00788923;IPI00184851;IPI00792485;IPI00946506;IPI00793350;IPI00795607;IPI00946314	IPI00788923	1;1;1;1;1;1;1	1;1;1;1;1;1;1	1;1;1;1;1;1;1	CMP-NeuAc:beta-galactoside alpha-2,3-sialyltransferase VI;Sialyltransferase 10;ST3Gal VI;Type 2 lactosamine alpha-2,3-sialyltransferase;Putative uncharacterized protein ST3GAL6;cDNA FLJ11060 fis, clone PLACE1004751, highly similar to Type 2 lactosaminealpha-2,3-sialyltransferase (EC 2.4.99.-)	SIAT10;ST3GAL6	43 kDa protein;Type 2 lactosamine alpha-2,3-sialyltransferase;Putative uncharacterized protein ST3GAL6;Putative uncharacterized protein ST3GAL6;cDNA FLJ11060 fis, clone PLACE1004751, highly similar to Type 2 lactosaminealpha-2,3-sialyltransferase;22 kDa pr	Q9Y274;C9J0E2;C9J480;C9IZL6;B3KMI1;C9JWJ3	7	1	1	1	1	1	1	1	1	1	1	1	1	1	1	1	2.6	2.6	2.6	43.47	384	1	1	1	1	0.020429	94456	35965	21481	27316	9694.5	61669	20892	20318	11531	4
141	342;2106			IPI00790739;IPI00017855;IPI00909879	IPI00790739;IPI00017855;IPI00909879	IPI00790739	2;2;1	2;2;1	2;2;1	Aconitase 2, mitochondrial;Aconitate hydratase, mitochondrial;Citrate hydro-lyase;cDNA, FLJ95737, highly similar to Homo sapiens aconitase 2, mitochondrial (ACO2), nuclear geneencoding mitochondrial protein, mRNA;cDNA FLJ60429, highly similar to Aconitate hydratase, mitochondrial (EC 4.2.1.3);cDNA FLJ54329, highly similar to Aconitate hydratase, mitochondrial(EC 4.2.1.3);cDNA FLJ52327, highly sim…	ACO2;RP3-347H13.8-002	Aconitase 2, mitochondrial;Aconitate hydratase, mitochondrial;cDNA FLJ50886, highly similar to Aconitate hydratase, mitochondrial	A2A274;Q99798;B2RBW5;B4DEC3;B4DJW1;B4DLY4;B4DZ08;Q71UF1;B4DW08	3	2	2	2	2	2	1	2	2	2	1	2	2	2	1	2	3.1	3.1	3.1	87.819	805	3	3	1	2	6.35e-12	555910	253010	176270	54044	72586	195840	405370	57925	47520	4
535	6;211;216;765;1053;1076;1140;1141;1179;1208;1305;1785;2578;2932;3219;3256			IPI00791534;IPI00926256;IPI00798038;IPI00478422;IPI00930113	IPI00791534;IPI00926256	IPI00791534	16;16;4;3;1	16;16;4;3;1	16;16;4;3;1	Anion exchange protein 1;Band 3 anion transport protein;Solute carrier family 4 member 1;Solute carrier family 4, anion exchanger, number 1;Erythroid anion exchange protein	AE1;DI;EPB3;SLC4A1	104 kDa protein;Band 3 anion transport protein	P02730;B7ZFE0;Q6LDU9	5	16	16	16	16	16	15	16	16	16	15	16	16	16	15	16	21.7	21.7	21.7	103.88	929	18	17	16	17	2.4e-124	27414000	12275000	6226400	4052800	4860500	16190000	8114800	3165900	7344000	4
533	1919			IPI00795979;IPI00789008;IPI00872619	IPI00795979;IPI00789008;IPI00872619	IPI00795979	1;1;1	1;1;1	1;1;1	Epidermal surface antigen;Flotillin-2;Membrane component chromosome 17 surface marker 1;FLOT2 protein;Flotillin 2;HCG1998851, isoform CRA_e	ESA1;FLOT2;M17S1;hCG_1998851	53 kDa protein;Flotillin-2;FLOT2 protein	Q14254;Q6FG43;Q9BTI6	3	1	1	1	1	0	0	0	1	0	0	0	1	0	0	0	2.3	2.3	2.3	53.137	483	1				0.077038	103510	103510	0	0	0	125210	0	0	0	1
479	1;819;820;937;1214;1730;2182;2351;2948			IPI00796333;IPI00465439;IPI00418262;IPI00792375;IPI00922081;IPI00922665;IPI00218407;IPI00942961;IPI00513830	IPI00796333;IPI00465439	IPI00796333	9;9;2;2;2;2;1;1;1	9;9;2;2;2;2;1;1;1	9;9;2;2;2;2;1;1;1	Fructose-bisphosphate aldolase A;Lung cancer antigen NY-LU-1;Muscle-type aldolase;Fructose-bisphosphate aldolase	ALDA;ALDOA	45 kDa protein;Fructose-bisphosphate aldolase A	P04075;A4UCS9;A4UCT0	9	9	9	9	6	7	7	9	6	7	7	9	6	7	7	9	22.5	22.5	22.5	45.26	418	6	7	7	9	3.41e-34	21374000	2416800	2460600	10059000	6437600	2524100	2934700	12006000	9029600	4
427	125;418;496;1157;2911	51	166	IPI00796366;IPI00335168;IPI00789605;IPI00930599;IPI00795576;IPI00793089;IPI00413922;IPI00797626;IPI00796500;IPI00795944;IPI00101961;IPI00909366;IPI00027255;IPI00792530	IPI00796366;IPI00335168;IPI00789605;IPI00930599;IPI00795576;IPI00793089;IPI00413922;IPI00797626;IPI00796500;IPI00795944	IPI00796366	5;5;5;5;4;4;4;3;3;3;2;1;1;1	5;5;5;5;4;4;4;3;3;3;2;1;1;1	5;5;5;5;4;4;4;3;3;3;2;1;1;1	cDNA FLJ56329, highly similar to Myosin light polypeptide 6;17 kDa myosin light chain;Myosin light chain 3;Myosin light chain alkali 3;Myosin light polypeptide 6;Smooth muscle and nonmuscle myosin light chain alkali 6;MYL6 protein	MYL6	cDNA FLJ56329, highly similar to Myosin light polypeptide 6;Isoform Non-muscle of Myosin light polypeptide 6;Isoform Smooth muscle of Myosin light polypeptide 6;16 kDa protein;13 kDa protein;13 kDa protein;11 kDa protein;11 kDa protein;10 kDa protein;8 kDa	B7Z6Z4;P60660-1;P60660;P60660-2;Q6IBG5	14	5	5	5	5	5	5	5	5	5	5	5	5	5	5	5	24.8	24.8	24.8	26.707	238	7	7	7	7	6.79e-83	172840000	70695000	51339000	32162000	18642000	97134000	69777000	24912000	22794000	4
176	625			IPI00796864;IPI00641116;IPI00022018;IPI00790317	IPI00796864;IPI00641116;IPI00022018;IPI00790317	IPI00796864	1;1;1;1	1;1;1;1	1;1;1;1	Dolichyl-phosphate mannosyltransferase polypeptide 1, catalytic subunit;Dolichol-phosphate mannose synthase;Dolichol-phosphate mannosyltransferase;Dolichyl-phosphate beta-D-mannosyltransferase;Mannose-P-dolichol synthase	DPM1;RP5-914P20.2-003;RP5-914P20.2-005;RP5-914P20.2-004	Dolichyl-phosphate mannosyltransferase polypeptide 1, catalytic subunit;Dolichyl-phosphate mannosyltransferase polypeptide 1, catalytic subunit;Dolichol-phosphate mannosyltransferase;Dolichyl-phosphate mannosyltransferase polypeptide 1, catalytic subunit	Q5QPK0;Q5QPK2;O60762;Q96HK0;Q5QPJ9	4	1	1	1	1	1	1	1	1	1	1	1	1	1	1	1	4.1	4.1	4.1	33.349	295	1	1	1	1	8.99e-06	57253	25097	11645	14589	5920.9	37227	14835	10662	6919.3	4
377	3217			IPI00796990;IPI00291867	IPI00796990;IPI00291867	IPI00796990	1;1	1;1	1;1	cDNA FLJ76262, highly similar to Homo sapiens I factor (complement) (IF), mRNA;cDNA FLJ58124, highly similar to Complement factor I (EC 3.4.21.45);C3B/C4B inactivator;Complement factor I;Complement factor I heavy chain;Complement factor I light chain;Light chain of factor I;Heavy chain of factor I	CFI;IF	cDNA FLJ58124, highly similar to Complement factor I;Complement factor I	A8K3L0;B4DRF2;P05156;Q6LAM0;Q6LAM1	2	1	1	1	1	1	1	1	1	1	1	1	1	1	1	1	2.7	2.7	2.7	66.695	591	1	1	1	1	5.06e-07	293180	65382	47003	38327	142460	29573	22981	14331	339810	4
305	653;1953;2686;2715			IPI00798127;IPI00792712;IPI00793729;IPI00789107;IPI00719280;IPI00790633;IPI00794925;IPI00795527;IPI00793810;IPI00797400;IPI00796600;IPI00179330;IPI00794211;IPI00796007;IPI00784990;IPI00789823;IPI00456429;IPI00793330;IPI00798155;IPI00794205;IPI00418813;IPI00654754;IPI00792139;IPI00879555;IPI00248597	IPI00798127;IPI00792712;IPI00793729;IPI00789107;IPI00719280;IPI00790633;IPI00794925;IPI00795527;IPI00793810;IPI00797400;IPI00796600;IPI00179330;IPI00794211;IPI00796007;IPI00784990;IPI00789823;IPI00456429;IPI00793330;IPI00798155;IPI00794205;IPI00418813;IPI00654754;IPI00792139	IPI00798127	4;4;4;4;4;4;4;4;4;4;4;4;4;4;4;4;4;4;4;3;3;3;3;1;1	4;4;4;4;4;4;4;4;4;4;4;4;4;4;4;4;4;4;4;3;3;3;3;1;1	4;4;4;4;4;4;4;4;4;4;4;4;4;4;4;4;4;4;4;3;3;3;3;1;1	cDNA FLJ75516, highly similar to Xenopus tropicalis ubiquitin C, mRNA;Ubiquitin C variant;Ubiquitin C splice variant;Putative uncharacterized protein;UBC protein;cDNA FLJ32377 fis, clone SKMUS1000014, highly similar to Polyubiquitin 9;Putative uncharacterized protein DKFZp434K0435;Ubiquitin B;Ubiquitin B, isoform CRA_a;40S ribosomal protein S27a;cDNA, FLJ96793, Homo sapiens ribosomal protein S27a…	UBC;DKFZp434K0435;hCG_1998947;UBB;RPS27A;UBA80;UBCEP1;hCG_1987923;UBA52;UBCEP2;hCG_37048	ubiquitin C;39 kDa protein;UBC protein;30 kDa protein;ubiquitin B precursor;25 kDa protein;21 kDa protein;21 kDa protein;19 kDa protein;19 kDa protein;18 kDa protein;ubiquitin and ribosomal protein S27a precursor;18 kDa protein;cDNA FLJ51326, highly simila	A8K674;Q59EM9;Q5PY61;Q66K58;Q96H31;Q96MH4;Q9UFQ0;Q96C32;Q5U5U6;P62979;B2RDW1;Q5RKT7;Q8WYN9;B4DV12;Q5UGI3;P62987;Q3MIH3;P62988;Q49A90;A8CGI2	25	4	4	4	3	4	4	4	3	4	4	4	3	4	4	4	52.6	52.6	52.6	77.028	685	3	4	4	4	4.34e-47	9195400	2513200	2634400	2419400	1628300	3853800	3376800	2002200	2275200	4
286	280			IPI00798392;IPI00073180;IPI00332970;IPI00792992;IPI00791421;IPI00790499;IPI00788648;IPI00789993;IPI00922680	IPI00798392;IPI00073180;IPI00332970;IPI00792992;IPI00791421;IPI00790499;IPI00788648;IPI00789993;IPI00922680	IPI00798392	1;1;1;1;1;1;1;1;1	1;1;1;1;1;1;1;1;1	1;1;1;1;1;1;1;1;1	cDNA FLJ58966, highly similar to Ras-related protein Rab-37;Putative uncharacterized protein RAB37;Ras-related protein Rab-37;cDNA FLJ61124, highly similar to Ras-related protein Rab-37;cDNA FLJ75617, highly similar to Homo sapiens RAB37, member RAS oncogene family (RAB37), transcript variant 3, mRNA;RAB37, member RAS oncogene family;RAB37, member RAS oncogene family, isoform CRA_d;RAB37, member …	RAB37;hCG_1986458	RAB37, member RAS oncogene family isoform 4;Ras-related protein Rab-37;RAB37, member RAS oncogene family isoform 3;Putative uncharacterized protein RAB37;Putative uncharacterized protein RAB37;RAB37, member RAS oncogene family isoform 5;cDNA FLJ45130 fis,	A8MYT0;Q96AX2;B7Z3L0;Q8IWA7;A8MZI4;A8MTC6;A8MXF5;B3KPZ5;A8MSP2;A8MUU7;B7Z4X1	9	1	1	1	1	1	1	1	1	1	1	1	1	1	1	1	6.1	6.1	6.1	25.663	228	1	1	1	1	0.026759	237510	84501	75853	48820	28340	84424	133360	40323	37432	4
540	581;1646			IPI00816799;IPI00829653;IPI00890703	IPI00816799;IPI00829653;IPI00890703	IPI00816799	2;2;1	2;2;1	1;1;1	Rheumatoid factor D5 light chain;Cryocrystalglobulin CC1 kappa light chain variable region	V<kappa>3	Rheumatoid factor D5 light chain (Fragment);Putative uncharacterized protein ENSP00000374812;Cryocrystalglobulin CC1 kappa light chain variable region (Fragment)	A0N5G5;A6NJ14;B1N7B8	3	2	2	1	2	2	2	2	2	2	2	2	1	1	1	1	22.9	22.9	15.3	12.766	118	3	3	3	3	3.72e-84	26095000	1732700	976780	19762000	3623500	1100400	653590	22599000	4576200	4
542	203;815;1647			IPI00827510;IPI00827637	IPI00827510;IPI00827637	IPI00827510	3;2	1;0	1;0	HRV Fab 026-VL;K light chain variable region		HRV Fab 026-VL (Fragment);K light chain variable region (Fragment)	A2IPI5;A2NXP9	2	3	1	1	3	2	3	2	1	0	1	0	1	0	1	0	35.4	13.3	13.3	11.994	113	1		1		1.09e-29	805770	31860	0	773910	0	2009.7	0	810430	0	2
543	684;2110			IPI00828061;IPI00384400;IPI00827846	IPI00828061;IPI00384400;IPI00827846	IPI00828061	2;1;1	1;1;1	1;1;1	Anti-mucin1 heavy chain variable region;Myosin-reactive immunoglobulin heavy chain variable region		Anti-mucin1 heavy chain variable region (Fragment);Myosin-reactive immunoglobulin heavy chain variable region (Fragment);Anti-mucin1 heavy chain variable region (Fragment)	A2JA14;Q9UL84;A2JA17	3	2	1	1	1	1	2	1	0	0	1	0	0	0	1	0	21.8	12.9	12.9	13.908	124			1		7.29e-70	722410	0	0	722410	0	0	0	722410	0	1
545	2442;3044;3269			IPI00829877;IPI00747752;IPI00827776	IPI00829877	IPI00829877	3;1;1	1;1;1	1;1;1	IGL@ protein	IGL@	IGL@ protein	Q5FWF9	3	3	1	1	3	3	3	2	1	1	1	0	1	1	1	0	17.7	6	6	24.794	232	1	1	1		3e-30	608500	101420	24344	482740	0	20130	5222.9	611900	0	3
546	200;210;345			IPI00829912;IPI00829956;IPI00387026;IPI00387024	IPI00829912;IPI00829956;IPI00387026	IPI00829912	3;3;2;1	3;3;2;1	3;3;2;1	Ig kappa chain V-I region HK102;Rheumatoid factor C6 light chain;Ig kappa chain V-I region EU	IGKV1-5;V<kappa>1	Ig kappa chain V-I region HK102 (Fragment);Rheumatoid factor C6 light chain (Fragment);Ig kappa chain V-I region EU	P01602;A0N5G1;P01598	4	3	3	3	3	3	3	3	3	3	3	3	3	3	3	3	37.6	37.6	37.6	12.768	117	3	5	5	5	9.01e-119	36196000	458000	755140	31685000	3298500	338710	688540	33604000	3869400	4
547	836;852;1216;1425;1557;2242;2339			IPI00843975;IPI00872684	IPI00843975;IPI00872684	IPI00843975	7;7	1;1	1;1	Cytovillin;Ezrin;p81;Villin-2;cDNA, FLJ92973, highly similar to Homo sapiens villin 2 (ezrin) (VIL2), mRNA;cDNA FLJ53435, highly similar to Ezrin;cDNA FLJ54141, highly similar to Ezrin;cDNA, FLJ78930, highly similar to Ezrin;Cytovillin 2	EZR;VIL2	Ezrin;69 kDa protein	P15311;B2R6J2;B7Z437;B7Z5V2;B7Z9R6;Q6NUR7;Q9UJZ2;Q9UJZ6;Q9UJZ7;Q9UJZ8;Q9UK20	2	7	1	1	5	7	6	7	1	1	1	1	1	1	1	1	10.6	2.9	2.9	69.412	586	1	1	1	1	1e-09	98027	27141	18401	26964	25521	32380	21394	28204	42688	4
258	1860			IPI00847381;IPI00029061	IPI00847381;IPI00029061	IPI00847381	1;1	1;1	1;1	Selenoprotein P	SELP;SEPP1	selenoprotein P isoform 2;Selenoprotein P	P49908	2	1	1	1	1	1	1	1	1	1	1	1	1	1	1	1	5.4	5.4	5.4	45.729	411	1	1	1	1	0.014382	141510	17955	25977	43077	54498	11926	18652	23655	131680	4
532	787;2891			IPI00847665;IPI00398576;IPI00930549;IPI00917064;IPI00815737;IPI00788612;IPI00867554;IPI00917579;IPI00916076;IPI00017465	IPI00847665;IPI00398576;IPI00930549;IPI00917064;IPI00815737;IPI00788612;IPI00867554;IPI00917579;IPI00916076;IPI00017465	IPI00847665	2;2;2;2;2;2;2;2;2;2	2;2;2;2;2;2;2;2;2;2	2;2;2;2;2;2;2;2;2;2	cDNA FLJ55165, highly similar to Particularly interesting new Cys-His protein;LIM and senescent cell antigen-like-containing domain protein 2;LIM-like protein 2;Particularly interesting new Cys-His protein 2;cDNA FLJ56117, highly similar to Homo sapiens LIM and senescent cell antigen-like domains 2 (LIMS2), mRNA;cDNA FLJ55509, highly similar to Particularly interesting newCys-His protein;cDNA FLJ…	LIMS2;PINCH2;LIMS1;PINCH;PINCH1;DKFZp547D192	cDNA FLJ55165, highly similar to Particularly interesting new Cys-His protein;Isoform 2 of LIM and senescent cell antigen-like-containing domain protein 2;LIM and senescent cell antigen-like domains 2 isoform 1;cDNA FLJ55509, highly similar to Particularly	B7Z7R3;Q7Z4I7-2;Q7Z4I7;B4DMV1;B7Z907;Q7Z4I7-1;B3KNZ3;P48059;B7Z483;Q7Z4I7-3;Q7Z4I5;Q7Z4I2;Q7Z4I3;Q7Z4I4;A0PJ44;Q53RZ1;Q9BV95;Q9H058;Q9NWG2	10	2	2	2	1	2	2	2	1	2	2	2	1	2	2	2	4.7	4.7	4.7	44.39	387	1	2	2	2	0.00015874	3830900	145520	860290	1894700	930320	893610	796790	1779100	1213800	4
549	1578;2116			IPI00852685;IPI00936125;IPI00935307;IPI00924442;IPI00936881;IPI00884341	IPI00852685;IPI00936125;IPI00935307;IPI00924442;IPI00936881;IPI00884341	IPI00852685	2;2;2;2;2;2	2;2;2;2;2;2	2;2;2;2;2;2	Diaphanous-related formin-1;Protein diaphanous homolog 1;cDNA FLJ61549, highly similar to Protein diaphanous homolog 1;Diaphanous 1;Diaphanous-1;cDNA FLJ55595, highly similar to Protein diaphanous homolog 1;DIAPH1 protein;Diaphanous homolog 1 (Drosophila);Diaphanous homolog 1 (Drosophila), isoform CRA_a;Putative uncharacterized protein DIAPH1	DIAP1;DIAPH1;hCG_42523	Isoform 1 of Protein diaphanous homolog 1;141 kDa protein;diaphanous 1 isoform 2;Diaphanous homolog 1;Putative uncharacterized protein DIAPH1;Isoform 2 of Protein diaphanous homolog 1	O60610-1;O60610;B4E2I7;Q6URC4;A0RZB7;A0RZB8;B4DVR3;Q17RN4;Q96IL1;Q6UUU0;Q7KZJ7;B9ZVX0;O60610-2	6	2	2	2	2	1	1	2	2	1	1	2	2	1	1	2	2.5	2.5	2.5	141.35	1272	2	1	1	2	0.00057697	482790	153590	99671	48707	180830	65765	0	159020	298880	3
380	134;385			IPI00852987;IPI00292858;IPI00853163	IPI00852987;IPI00292858;IPI00853163	IPI00852987	2;2;2	2;2;2	2;2;2	cDNA, FLJ95575, highly similar to Homo sapiens endothelial cell growth factor 1 (platelet-derived) (ECGF1), mRNA;Gliostatin;Platelet-derived endothelial cell growth factor;TdRPase;Thymidine phosphorylase;Putative uncharacterized protein TYMP	ECGF1;TYMP	cDNA, FLJ95575, highly similar to Homo sapiens endothelial cell growth factor 1 (platelet-derived) (ECGF1), mRNA;Thymidine phosphorylase;Putative uncharacterized protein TYMP	B2RBL3;P19971;C9JGI3	3	2	2	2	1	2	2	2	1	2	2	2	1	2	2	2	8.4	8.4	8.4	50.404	487	1	2	2	2	0.0035152	437350	43684	38507	225320	129840	31107	19207	260690	225140	4
425	384;1665;1963			IPI00854815;IPI00329757;IPI00658172	IPI00854815;IPI00329757	IPI00854815	3;3;1	3;3;1	3;3;1	Calcium and DAG-regulated guanine nucleotide exchange factor I;Cdc25-like protein;F25B3.3 kinase-like protein;RAS guanyl-releasing protein 2;cDNA FLJ35563 fis, clone SPLEN2005342, highly similar to Homo sapiens RAS guanyl releasing protein 2 (calcium and DAG-regulated) (RASGRP2), transcript variant 2, mRNA;Putative uncharacterized protein RASGRP2;cDNA, FLJ95480, highly similar to Homo sapiens RAS…	CDC25L;MCG7;RASGRP2	Isoform 2 of RAS guanyl-releasing protein 2;Isoform 1 of RAS guanyl-releasing protein 2	Q7LDG7-2;Q7LDG7;A6NDC7;B2RBF2;Q2YDB1;Q7LDG7-1;B3KV60	3	3	3	3	3	3	3	3	3	3	3	3	3	3	3	3	9.5	9.5	9.5	75.546	671	3	3	3	3	5.47e-11	1245500	202580	235350	485890	321710	286540	260000	636330	370260	4
554	88;987;1473;1518;1988;2374;2403			IPI00867509;IPI00943173;IPI00798401;IPI00797709	IPI00867509;IPI00943173;IPI00798401;IPI00797709	IPI00867509	7;7;6;4	7;7;6;4	6;6;5;4	Coronin-1C_i2 protein;Coronin-1C_i3 protein;cDNA FLJ13143 fis, clone NT2RP3003230, highly similar to Coronin-1C;Coronin, actin binding protein, 1C variant;Coronin-1C;Coronin-3;hCRNN4;cDNA FLJ51205, highly similar to Coronin-1C;cDNA, FLJ79403, highly similar to Coronin-1C;cDNA, FLJ78964, highly similar to Coronin-1C;cDNA FLJ50992, highly similar to Coronin-1C	CORO1C;CRNN4	Coronin-1C_i3 protein;Coronin-1C;cDNA FLJ50992, highly similar to Coronin-1C;18 kDa protein	A7MAP0;A7MAP1;B3KN06;Q53G58;Q59EA2;Q9ULV4;B4E3S0;B7Z9V0;B4DMH3	4	7	7	6	7	7	7	7	7	7	7	7	6	6	6	6	15.2	15.2	13.9	58.947	527	7	8	7	8	6.02e-75	8490900	1298700	1813100	2833200	2545800	1442100	2152000	2996900	4255200	4
116	2552			IPI00871851;IPI00014177;IPI00894340;IPI00893645;IPI00894199;IPI00893096;IPI00892810;IPI00893902;IPI00894322;IPI00892518;IPI00894283;IPI00892932;IPI00893477;IPI00893240;IPI00893788	IPI00871851;IPI00014177;IPI00894340;IPI00893645;IPI00894199;IPI00893096;IPI00892810;IPI00893902;IPI00894322;IPI00892518;IPI00894283;IPI00892932;IPI00893477;IPI00893240;IPI00893788	IPI00871851	1;1;1;1;1;1;1;1;1;1;1;1;1;1;1	1;1;1;1;1;1;1;1;1;1;1;1;1;1;1	1;1;1;1;1;1;1;1;1;1;1;1;1;1;1	Neural precursor cell expressed developmentally down-regulated protein 5;Septin-2;Putative uncharacterized protein SEPT2	DIFF6;KIAA0158;NEDD5;SEPT2	Isoform 2 of Septin-2;Isoform 1 of Septin-2;Putative uncharacterized protein SEPT2;Putative uncharacterized protein SEPT2;Putative uncharacterized protein SEPT2;Putative uncharacterized protein SEPT2;Putative uncharacterized protein SEPT2;Putative uncharac	Q15019-2;Q15019;Q15019-1;B5MCX3;C9J2Q4;C9JB25;C9J938;C9JQJ4;C9JCL7;C9IZU3;B5MC08;C9IY94;C9JZI2;B5MD47;C9JAS6;C9JFT1	15	1	1	1	1	1	0	1	1	1	0	1	1	1	0	1	4	4	4	45.46	396	1	1		1	0.032506	201820	80472	63329	0	58015	104000	79664	0	89256	3
49	154;266;449;617;1610;2146;2856			IPI00871870;IPI00005162;IPI00911088;IPI00796102;IPI00794982;IPI00797967	IPI00871870;IPI00005162;IPI00911088;IPI00796102	IPI00871870	7;7;6;4;2;2	7;7;6;4;2;2	7;7;6;4;2;2	Actin-related protein 2/3 complex subunit 3;Arp2/3 complex 21 kDa subunit;cDNA, FLJ92050, highly similar to Homo sapiens actin related protein 2/3 complex, subunit 3, 21kDa (ARPC3), mRNA;Actin related protein 2/3 complex;cDNA FLJ51245, highly similar to Actin-related protein 2/3 complex subunit 3;Putative uncharacterized protein ARPC3	ARC21;ARPC3	Putative uncharacterized protein ARPC3 (Fragment);Actin-related protein 2/3 complex subunit 3;cDNA FLJ51245, highly similar to Actin-related protein 2/3 complex subunit 3;Putative uncharacterized protein ARPC3	A8MYY8;O15145;B2R4D5;Q2LE71;B4DM63;C9JZD1	6	7	7	7	7	6	7	6	7	6	7	6	7	6	7	6	48.9	48.9	48.9	20.528	178	8	7	8	7	1.2e-34	9078100	2657600	2078400	2759600	1582500	3262600	2885400	2719400	2355100	4
538	1590			IPI00871988;IPI00942178;IPI00793874	IPI00871988;IPI00942178;IPI00793874	IPI00871988	1;1;1	1;1;1	1;1;1	cDNA FLJ58980, highly similar to Sideroflexin-3;Putative uncharacterized protein SFXN3;Sideroflexin 3;Sideroflexin-3	hCG_24661;SFXN3	cDNA FLJ58980, highly similar to Sideroflexin-3;Sideroflexin 3;sideroflexin 3	B4DRS6;A6NCZ6;Q9BWM7	3	1	1	1	1	0	0	0	1	0	0	0	1	0	0	0	2.7	2.7	2.7	36.35	329	1				0.025885	57808	57808	0	0	0	69926	0	0	0	1
555	981;1009;2110			IPI00873155;IPI00830088;IPI00828105;IPI00888954;IPI00816409;IPI00827940;IPI00943902;IPI00827581;IPI00829806;IPI00783244;IPI00784513;IPI00827589;IPI00783094;IPI00783393;IPI00827482;IPI00828156;IPI00736507;IPI00783116;IPI00783818;IPI00783909;IPI00748665;IPI00827678;IPI00854707;IPI00829976;IPI00829724;IPI00413194;IPI00760721;IPI00828153;IPI00383887;IPI00827938;IPI00827814;IPI00828085;IPI00827929;IPI…	IPI00873155;IPI00830088	IPI00873155	3;2;1;1;1;1;1;1;1;1;1;1;1;1;1;1;1;1;1;1;1;1;1;1;1;1;1;1;1;1;1;1;1;1;1;1	2;1;0;0;1;0;0;0;0;0;0;0;0;0;1;0;0;0;0;0;0;0;0;0;0;0;0;0;0;0;0;0;0;0;0;1	2;1;0;0;1;0;0;0;0;0;0;0;0;0;1;0;0;0;0;0;0;0;0;0;0;0;0;0;0;0;0;0;0;0;0;1			hypothetical protein XP_002343513;13 kDa protein	A8MUN6	36	3	2	2	2	2	3	2	1	1	2	1	1	1	2	1	17.1	9.6	9.6	15.874	146	2	1	3	1	1.5e-70	3579500	145690	367600	2588200	478020	155600	592930	2160300	1100700	4
423	2775			IPI00873223;IPI00939504;IPI00329331;IPI00395676	IPI00873223;IPI00939504;IPI00329331;IPI00395676	IPI00873223	1;1;1;1	1;1;1;1	1;1;1;1	cDNA, FLJ95012, highly similar to Homo sapiens UDP-glucose pyrophosphorylase 2 (UGP2), mRNA;cDNA FLJ56155, highly similar to UTP--glucose-1-phosphate uridylyltransferase 2 (EC 2.7.7.9);Putative uncharacterized protein UGP2;UDP-glucose pyrophosphorylase;UTP--glucose-1-phosphate uridylyltransferase	UGP2;UGP1	cDNA FLJ56155, highly similar to UTP--glucose-1-phosphate uridylyltransferase 2;Putative uncharacterized protein UGP2;Isoform 1 of UTP--glucose-1-phosphate uridylyltransferase;Isoform 2 of UTP--glucose-1-phosphate uridylyltransferase	B2RAN1;B4DUP2;C9JKD6;Q16851-1;Q16851;Q53QE9;Q16851-2	4	1	1	1	1	1	1	1	1	1	1	1	1	1	1	1	4.8	4.8	4.8	57.791	517	1	1	1	1	0.00082329	123330	18035	20506	45425	39367	19730	24250	56092	56936	4
175	92;93;212;459;552;733;1229;1239;1520;1793;1814;1934;1935;2127;2172;2273;2274;2343;2344;2764;2841;3142;3198	29;30	104;115	IPI00877703;IPI00021891;IPI00877792;IPI00219713;IPI00411626;IPI00877625	IPI00877703;IPI00021891;IPI00877792;IPI00219713	IPI00877703	23;23;23;23;7;7	23;23;23;23;7;7	23;23;23;23;7;7	Putative uncharacterized protein FGG;Fibrinogen gamma chain	FGG;PRO2061	Putative uncharacterized protein FGG;Isoform Gamma-B of Fibrinogen gamma chain;Putative uncharacterized protein FGG;Isoform Gamma-A of Fibrinogen gamma chain	C9JC84;P02679-1;P02679;C9JEU5;P02679-2	6	23	23	23	23	23	23	22	23	23	23	22	23	23	23	22	50.1	50.1	50.1	52.337	461	37	35	35	36	0	616000000	150520000	160780000	167310000	137390000	175980000	214000000	168580000	220760000	4
241	1998			IPI00880170;IPI00027437;IPI00790905	IPI00880170;IPI00027437;IPI00790905	IPI00880170	1;1;1	1;1;1	1;1;1	Putative uncharacterized protein TSPAN9;Tetraspan NET-5;Tetraspanin-9	TSPAN9;NET5	Putative uncharacterized protein TSPAN9;Tetraspanin-9;8 kDa protein	B5MD23;O75954	3	1	1	1	1	1	0	0	1	1	0	0	1	1	0	0	4.1	4.1	4.1	29.559	271	1	1			3.19e-12	425340	244830	180510	0	0	325460	206710	0	0	2
444	957;2532;3033			IPI00884081;IPI00385059	IPI00884081;IPI00385059	IPI00884081	3;3	3;3	1;1	Rearranged VH4-34 V gene segment	VH4-34	Putative uncharacterized protein ENSP00000375025;Rearranged VH4-34 V gene segment (Fragment)	A6NCT5;Q7Z3Y6	2	3	3	1	3	3	2	3	3	3	2	3	1	1	1	1	26	26	17.1	13.815	123	3	5	3	3	5.27e-33	61362000	1283700	2608400	55728000	1742300	514690	1264500	60987000	711280	4
191	2126;2408;2409;2621;2801;3094;3240			IPI00884926;IPI00022429	IPI00884926;IPI00022429	IPI00884926	7;7	7;7	5;5	Orosomucoid 1;Orosomucoid 1,;Alpha-1-acid glycoprotein 1;Orosomucoid-1	ORM1;hCG_2020846;RP11-82I1.3-001;AGP1	orosomucoid 1 precursor;Alpha-1-acid glycoprotein 1	B7ZKQ5;Q5T539;P02763	2	7	7	5	7	7	6	7	7	7	6	7	5	5	5	5	34.3	34.3	25.9	23.539	201	10	10	7	10	1.43e-52	62982000	8752300	8377800	6961400	38890000	7162000	7138100	3828000	72567000	4
559	1812;2449;3253;3269			IPI00887169;IPI00719452;IPI00450309;IPI00382420;IPI00385254	IPI00887169;IPI00719452;IPI00450309	IPI00887169	4;3;3;1;1	2;1;1;1;1	1;0;0;1;1	V1-17 protein;Putative uncharacterized protein;Anti-streptococcal/anti-myosin immunoglobulin lambda light chain variable region;V1-13 protein;IGL@ protein	V1-17;IGLV1-40;V1-13;IGL@	Putative uncharacterized protein;IGL@ protein;IGL@ protein	A2MYD0;Q8NEJ1;Q96SB0;Q5NV69;Q6GMX3;Q6GMX4;Q6IN99	5	4	2	1	3	4	4	4	1	2	2	2	1	1	1	1	23.3	8.9	5.5	25.024	236	1	2	3	2	1.45e-68	62709000	241710	4349700	56482000	1635200	114680	4185400	60075000	701540	4
561	202;446;815;2371;2789;2826;2827;2999			IPI00889156;IPI00784985;IPI00854644	IPI00889156;IPI00784985	IPI00889156	8;7;1	2;1;1	1;0;0	J kappa 5;IGK@ protein	IGK@	IGK@ protein;IGK@ protein	Q15537;Q6PIL8;Q6PJF2	3	8	2	1	7	7	8	7	1	1	2	1	0	0	1	0	37.7	13.6	6.8	25.834	236	1	1	2	1	4.59e-225	11784000	893760	557910	8337100	1995200	740440	438220	9025200	3134500	4
231	1997			IPI00889196;IPI00026964	IPI00889196;IPI00026964	IPI00889196	1;1	1;1	1;1	Putative cytochrome b-c1 complex subunit Rieske-like protein 1;Complex III subunit 5;Complex III subunit IX;Cytochrome b-c1 complex subunit 11;Cytochrome b-c1 complex subunit 5;Cytochrome b-c1 complex subunit Rieske, mitochondrial;Rieske iron-sulfur protein;Ubiquinol-cytochrome c reductase 8 kDa protein;Ubiquinol-cytochrome c reductase iron-sulfur subunit	UQCRFSL1;UQCRFS1	Cytochrome b-c1 complex subunit Rieske-like protein 1;Cytochrome b-c1 complex subunit Rieske, mitochondrial	P0C7P4;P47985	2	1	1	1	1	1	1	0	1	1	1	0	1	1	1	0	7.4	7.4	7.4	30.815	283	2	2	2		1.57e-05	372470	140990	122590	108890	0	181610	165470	92653	0	3
504	9;33;39;113;188;294;328;443;551;689;695;741;796;955;974;1001;1012;1023;1356;1402;1595;1654;1693;1844;1958;2078;2179;2216;2320;2323;2427;2505;2556;2632;2699;2770;2822;2849;2852;2868;2876;2943;3026;3181;3241	53	1128	IPI00892547;IPI00843913;IPI00643525;IPI00937598;IPI00032258;IPI00889723;CON__ENSEMBL:ENSBTAP00000007350;CON__P01030	IPI00892547;IPI00843913;IPI00643525;IPI00937598;IPI00032258;IPI00889723	IPI00892547	45;45;45;44;43;43;7;7	1;1;1;1;1;1;1;1	0;0;0;0;0;0;0;0	Complement component 4A (Rodgers blood group);Putative uncharacterized protein C4A;C4A3;Acidic complement C4;C3 and PZP-like alpha-2-macroglobulin domain-containing protein 2;C4a anaphylatoxin;C4b-A;C4d-A;Complement C4 beta chain;Complement C4 gamma chain;Complement C4-A;Complement C4-A alpha chain;C4A variant protein;C4A protein;cDNA FLJ55146, highly similar to Complement C4-B;cDNA FLJ60561, hig…	C4A;DADB-112B14.9-001;DAMC-258G8.6-001;DAQB-124C11.1-001;CO4;CPAMD2;C4A variant protein;C4B	Complement component 4A;Complement component 4A;Putative uncharacterized protein C4A;similar to C4A protein isoform 2;Complement C4-A;C4A protein	B0UZ83;B0V2C8;B2RUT6;Q5JNX2;Q6U2F6;P0C0L4;A7E2V2;B7ZVZ6;Q4LE82;Q6P4R1;A6H8M8;B4DDH0;B4DIE5;B7Z1F8;Q6U2E0;Q6U2E5;Q6U2E7;Q6U2E8;Q6U2F0;Q6U2F3;Q6U2F4;Q6U2I5;Q6U2K2;Q6U2L9;Q6XMI6;Q96EG2;Q9UM89;Q9UMV1	8	45	1	0	43	42	39	45	1	1	1	1	0	0	0	0	40	0.7	0	192.87	1744	1	1	2	2	0	10587000	364520	351220	9157600	714000	178620	188580	10197000	635180	4
462	9;33;39;113;188;294;328;551;689;695;741;796;955;974;1001;1012;1023;1037;1356;1402;1595;1654;1693;1720;1844;1958;2078;2179;2216;2320;2323;2427;2505;2556;2632;2699;2770;2822;2849;2852;2868;2876;2943;3026;3181;3241	53	1128	IPI00892604;IPI00418163;IPI00887154;IPI00935601	IPI00892604;IPI00418163;IPI00887154	IPI00892604	46;46;46;13	46;46;46;13	1;1;1;0	Complement component C4B (Childo blood group);Complement component C4B (Childo blood group) 2;C4A;C4A91;C4B1;cDNA FLJ54406, highly similar to Complement C4-B;Complement component 4B (Childo blood group);C4B;C4B2;C4B3;C4B5;Complement C4B;C4 complement C4d region;C4A2	C4B-1;C4B-2;DASS-307J8.2-001;DASS-307J8.7-001;C4A;C4B;XXbac-BCX116I9.7-001;XXbac-BPG116M5.7-001;C4B12;C4A13;DADB-112B14.11-001	Complement component C4B (Childo blood group) 2;complement component 4B preproprotein;Complement component 4B	A2BHY4;Q6U2F8;Q6U2G0;Q6U2G1;B4E344;Q6U2E9;Q6U2L6;Q6U2M2;Q6U2M5;Q6VCV8;Q96SA7;Q96SA8;B0UZ85;Q6U2H4;Q6U2L1;Q6U2L7	4	46	46	1	44	43	40	46	44	43	40	46	1	1	1	1	41.6	41.6	0.7	192.8	1744	53	52	51	54	0	187280000	19255000	13738000	124210000	30080000	11497000	7007900	172770000	22287000	4
96	1228			IPI00892894;IPI00011054;IPI00893260;IPI00514859	IPI00892894;IPI00011054;IPI00893260;IPI00514859	IPI00892894	1;1;1;1	1;1;1;1	1;1;1;1	Olfactory receptor family 12 subfamily D member 2;Hs6M1-20;Olfactory receptor 12D2;Olfactory receptor OR6-28;Olfactory receptor, family 12, subfamily D, member 2	DASS-5D2.7-001;OR12D2;DADB-136A24.1-001	Olfactory receptor family 12 subfamily D member 2;Olfactory receptor 12D2;Olfactory receptor, family 12, subfamily D, member 2;olfactory receptor, family 12, subfamily D, member 2	A2BDZ2;P58182;B0S862;B0UY34	4	1	1	1	0	1	0	0	0	1	0	0	0	1	0	0	2.9	2.9	2.9	34.927	307		1			0.026452	79338	0	79338	0	0	0	103740	0	0	1
421	959;2532;3033			IPI00893210;IPI00829811;IPI00328493;IPI00829753;IPI00827891;IPI00815662;IPI00830007	IPI00893210;IPI00829811;IPI00328493;IPI00829753;IPI00827891;IPI00815662;IPI00830007	IPI00893210	3;3;3;2;2;2;2	1;1;1;0;0;0;0	1;1;1;0;0;0;0	Full-length cDNA clone CS0DL004YM19 of B cells (Ramos cell line) of Homo sapiens (human);Cold agglutinin FS-2 H-chain;Rheumatoid factor G9 heavy chain	IGH@;VH4	Full-length cDNA clone CS0DL004YM19 of B cells (Ramos cell line) of Homo sapiens;Putative uncharacterized protein ENSP00000375039;Putative uncharacterized protein ENSP00000375038;Putative uncharacterized protein ENSP00000375028;Immunoglobulin V-set domain	Q86SX2;A6NE53;A6NCF7;C9IZI2;A2NB44;A0N5G4	7	3	1	1	3	2	1	3	1	0	0	1	1	0	0	1	25.4	16.7	16.7	13.966	126	1			1	7.32e-07	41833	8021.5	0	0	33811	1989.6	0	0	61783	2
127	481;3129			IPI00893936;IPI00478603;IPI00015988;IPI00893526	IPI00893936;IPI00478603;IPI00015988;IPI00893526	IPI00893936	2;2;2;2	1;1;1;1	1;1;1;1	HLA-G histocompatibility antigen, class I, G;HLA-G histocompatibility antigen, class I, G, isoform CRA_b;Major histocompatibility complex, class I, G;MHC class Ib antigen;HLA-G protein;MHC class I antigen;HLA class I histocompatibility antigen, alpha chain G;HLA G antigen;HLA-antigen;HLA-G*GJ4;HLA-G*GJ2;HLA G locus protein;HLA-G;Lymphocyte antigen;HLA-G histocompatibility antigen, class I, G, iso…	DAAP-84C21.8-002;HLA-G;DADB-15K14.8-002;DAMA-50J3.12-002;DAMC-101F5.7-002;DAQB-346J13.1-002;DASS-366B6.2-002;hCG_1999524;XXbac-BCX209H21.15-002;XXbac-BPG12I6.3-002;HLA-6.0;HLAG;HLA G locus;DADB-15K14.8-001;DAMA-50J3.12-001;DAMC-101F5.7-001;DAQB-346J13.1-001;DASS-366B6.2-001;XXbac-BCX209H21.15-001;XXbac-BPG12I6.3-001;MHC-G;HLA;DAAP-84C21.8-001	HLA-G histocompatibility antigen, class I, G;HLA-G histocompatibility antigen, class I, G, isoform CRA_b;HLA class I histocompatibility antigen, alpha chain G;MHC class Ib antigen	B0V1N4;Q5RJ85;Q6DU08;Q8MGQ7;Q8MH47;Q8WLS1;Q9MYA2;P17693;A5HSK0;A6YB83;B0L3P8;B0L3P9;B0L3Q0;B1P198;B5LFX8;B5LFY1;B7SFZ2;B7SFZ3;C0JSV2;C0JSV3;C0JT28;C0JT29;C0JT30;C0JTC7;C7SJ32;O02923;O02924;O02925;O02926;O02927;O02928;O02929;O19658;O19659;O19745;O19766;O19767;O19768;O19805;O19806;O19807;O19808;O19809;O78131;O78132;O78133;O78134;Q30182;Q68YR8;Q68YR9;Q68YS0;Q68YS1;Q68YS2;Q68YS3;Q68YS4;Q6B845;Q6B846;…	4	2	1	1	2	1	2	2	1	0	1	1	1	0	1	1	6.7	2.9	2.9	38.868	343	1		1	1	2.76e-15	3985500	2322700	0	1138900	523860	3368500	0	869310	548440	3
79	1901;3077			IPI00893937;IPI00646358;IPI00009742;IPI00644768;IPI00456607	IPI00893937;IPI00646358;IPI00009742;IPI00644768;IPI00456607	IPI00893937	2;2;2;2;2	2;2;2;2;2	2;2;2;2;2	Lymphocyte antigen 6 complex, locus G6D;HCG43720, isoform CRA_a;Lymphocyte antigen 6 complex, locus G6F;Megakaryocyte-enhanced gene transcript 1 protein;Lymphocyte antigen 6 complex locus protein G6f;Chromosome 6 open reading frame 21	DASS-312M4.4-004;LY6G6D;DADB-110M10.6-004;DAMA-236L13.18-004;DAMC-117B11.13-004;hCG_43720;LY6G6F;MEGT1;XXbac-BCX88C14.11-004;XXbac-BPG32J3.17-002;DAQB-350E15.1-004;C6orf21;G6F;NG32;DADB-127H9.8-001;DAMA-236L13.11-001;DAMC-117B11.5-001	Lymphocyte antigen 6 complex, locus G6D;HCG43720, isoform CRA_a;Lymphocyte antigen 6 complex, locus G6D;Lymphocyte antigen 6 complex locus protein G6f;32 kDa protein	A2BEY5;Q9NZJ1;Q5SQ65;Q5SQ64;B0UXB7	5	2	2	2	2	2	2	2	2	2	2	2	2	2	2	2	4.7	4.7	4.7	40.936	382	2	2	2	2	0.00015082	1917800	799460	656740	301090	160510	1085400	966010	181560	150580	4
558	165;318;479;749;1084;1111;2583;2824;3130;3155			IPI00893949;IPI00894325;IPI00876963;IPI00893694;IPI00893131;IPI00936164;IPI00954468;IPI00942071;IPI00871606;IPI00954545	IPI00893949;IPI00894325;IPI00876963;IPI00893694;IPI00893131;IPI00936164;IPI00954468	IPI00893949	10;10;10;10;10;10;7;3;3;3	10;10;10;10;10;10;7;3;3;3	0;0;0;0;0;0;0;0;0;0	MHC class I antigen;Major histocompatibility complex, class I, A;HLA class I histocompatibility antigen, A-2 alpha chain;MHC class I antigen A*2;Truncated MHC class I antigen;MHC class I;Leukocyte antigen, HLA-A2 variant;MHC class I antigen HLA-A heavy chain;HLA-A*0225 alpha1 & alpha2 domain;HLA-A2new protein;MHC class I antigen HLA-A;MHC class I HLA-A;Leukocyte antigen;HLA-A2 antigen;HLA-A;MHC c…	HLA-A;DADB-123D8.3-002;DAMC-190N15.1-002;HLAA;HLA;HLA-A*0226;HLA-A*0225;MHC class I HLA-A;HLA-A*02;HLA-B;DADB-123D8.3-001;HLA-A2;DAMC-190N15.1-001;DADB-123D8.3-003;DAMC-190N15.1-003	Major histocompatibility complex, class I, A;Major histocompatibility complex, class I, A;HLA class I histocompatibility antigen, A-2 alpha chain;Major histocompatibility complex, class I, A;Major histocompatibility complex, class I, A;Major histocompatibi	A0N0E2;A2V815;A4UTT5;A5A4G3;A5I8L1;A5JUX0;A6YT91;A7X594;A9R9N7;B2G3G4;B2LT55;B6E278;C5IWX5;C5IWX6;C5IWX9;C6H0P0;B0UZQ5;P01892;A0EVJ8;A0EVJ9;A0PFV7;A1E126;A1E127;A1Z0L6;A2BCQ4;A2TEL8;A2TJ23;A2VBX6;A3FEL9;A4USH3;A4UUL3;A4ZW41;A5A4L6;A5JSF5;A5JSF8;A5JSF9;A5JSG5;A5PHT6;A5YVG3;A5YVG5;A7L3S8;A7L3T2;A7LKN0;A7MAP2;A7UDS4;A8E0Y4;A8VYP1;A8YQI5;A9YQ94;A9YQA3;B0BKZ4;B0F9N2;B0LV24;B1B6Q4;B1PQ26;B1PQ32;B1Q4W3;…	10	10	10	0	5	10	4	6	5	10	4	6	0	0	0	0	34.8	34.8	0	41.449	371	5	10	4	6	1.33e-74	20490000	4694800	10736000	2077200	2981900	8344100	11487000	3428100	3303100	4
557	2005;2545			IPI00895800;IPI00878985;IPI00876962;IPI00937711;IPI00939502	IPI00895800;IPI00878985;IPI00876962;IPI00937711;IPI00939502	IPI00895800	2;2;2;1;1	2;2;2;1;1	2;2;2;1;1	HBEBP2-binding protein C;Inverted formin-2;Putative uncharacterized protein INF2	C14orf151;C14orf173;INF2	136 kDa protein;Isoform 1 of Inverted formin-2;Isoform 2 of Inverted formin-2;Isoform 3 of Inverted formin-2;Putative uncharacterized protein INF2	Q27J81-1;Q27J81;Q27J81-2;B5MDV6;Q27J81-3;C9JAR5	5	2	2	2	2	2	2	2	2	2	2	2	2	2	2	2	2.3	2.3	2.3	135.69	1250	2	2	2	2	6.29e-13	328510	55963	64660	146820	61064	56297	94217	156020	90177	4
208	896;1801;2068;2960;3218			IPI00902560;IPI00216026;IPI00455531;IPI00737171;IPI00024145;IPI00917420;IPI00888783;IPI00647902;IPI00647442;IPI00844015	IPI00902560;IPI00216026;IPI00455531;IPI00737171;IPI00024145;IPI00917420;IPI00888783	IPI00902560	5;5;5;5;5;5;4;2;2;1	5;5;5;5;5;5;4;2;2;1	5;5;5;5;5;5;4;2;2;1	Outer mitochondrial membrane protein porin 2;Voltage-dependent anion-selective channel protein 2;cDNA FLJ60120, highly similar to Voltage-dependent anion-selective channel protein 2;cDNA, FLJ78818, highly similar to Voltage-dependent anion-selective channel protein 2	VDAC2	Isoform 1 of Voltage-dependent anion-selective channel protein 2;Isoform 3 of Voltage-dependent anion-selective channel protein 2;similar to voltage-dependent anion channel 2;similar to voltage-dependent anion channel 2;Isoform 2 of Voltage-dependent anion	P45880-1;P45880;P45880-3;B4DKM5;P45880-2	10	5	5	5	4	5	3	4	4	5	3	4	4	5	3	4	18.8	18.8	18.8	33.371	309	4	5	3	4	1.69e-10	5792500	1989300	2674800	718500	409980	3335600	3150000	417180	374930	4
506	508;754;795;3202			IPI00903062;IPI00644231;IPI00550212;IPI00790459;IPI00790673;IPI00789699;IPI00719600	IPI00903062;IPI00644231;IPI00550212;IPI00790459;IPI00790673	IPI00903062	4;4;3;3;2;1;1	4;4;3;3;2;1;1	4;4;3;3;2;1;1	cDNA FLJ43948 fis, clone TESTI4014924, highly similar to Homo sapiens cytoplasmic FMR1 interacting protein 1 (CYFIP1), transcript variant 1, mRNA;Cytoplasmic FMR1-interacting protein 1;p140sra-1;Specifically Rac1-associated protein 1;cDNA FLJ43796 fis, clone TESTI4000153, highly similar to Homo sapiens cytoplasmic FMR1 interacting protein 1 (CYFIP1), transcript variant 1, mRNA	CYFIP1;KIAA0068	cDNA FLJ43948 fis, clone TESTI4014924, highly similar to Homo sapiens cytoplasmic FMR1 interacting protein 1 (CYFIP1), transcript variant 1, mRNA;Isoform 1 of Cytoplasmic FMR1-interacting protein 1;Isoform 2 of Cytoplasmic FMR1-interacting protein 1;57 kDa	B3KWV6;Q7L576-1;Q7L576;Q7L576-2;B3KWT5;Q7L576-3	7	4	4	4	4	1	4	4	4	1	4	4	4	1	4	4	5	5	5	145.52	1255	4	1	4	4	5.35e-16	875110	239490	56063	375940	203610	305250	120510	420300	218490	4
132	2114			IPI00909484;IPI00910473;IPI00016786	IPI00909484;IPI00910473;IPI00016786	IPI00909484	1;1;1	1;1;1	1;1;1	cDNA FLJ54776, highly similar to Cell division control protein 42 homolog;cDNA FLJ55107, highly similar to Cell division control protein 42 homolog;cDNA, FLJ79348, highly similar to Cell division control protein 42 homolog;Cell division control protein 42 homolog;G25K GTP-binding protein	CDC42	cDNA FLJ54776, highly similar to Cell division control protein 42 homolog;cDNA FLJ55107, highly similar to Cell division control protein 42 homolog;Isoform 2 of Cell division control protein 42 homolog	B4E1U9;B4DMH5;B7ZAY4;P60953-2;P60953	3	1	1	1	1	1	1	1	1	1	1	1	1	1	1	1	7.2	7.2	7.2	26.528	236	2	2	2	2	1.25e-07	1848800	471840	370920	652980	353020	570170	458910	682260	561910	4
159	228;1580;2504			IPI00909582;IPI00019912;IPI00847995	IPI00909582;IPI00019912;IPI00847995	IPI00909582	3;3;2	3;3;2	3;3;2	cDNA FLJ55431, highly similar to Peroxisomal multifunctional enzyme type 2;cDNA FLJ59409, highly similar to Peroxisomal multifunctional enzyme type 2;17-beta-hydroxysteroid dehydrogenase 4;3-alpha,7-alpha,12-alpha-trihydroxy-5-beta-cholest-24-enoyl-CoA hydratase;3-hydroxyacyl-CoA dehydrogenase;D-bifunctional protein;Peroxisomal multifunctional enzyme type 2;cDNA, FLJ92803, highly similar to Homo …	EDH17B4;HSD17B4	cDNA FLJ55431, highly similar to Peroxisomal multifunctional enzyme type 2;Peroxisomal multifunctional enzyme type 2;cDNA FLJ61268, highly similar to Peroxisomal multifunctional enzyme type 2	B4DNV1;B4DSD0;P51659;B2R659;B3KSP2;B4DDM5;B4DVS5;B4DI68;Q59H27;Q9UBA4	3	3	3	3	3	3	3	3	3	3	3	3	3	3	3	3	6.2	6.2	6.2	83.052	761	3	3	4	3	1.29e-37	1801600	661820	474220	494420	171170	839270	533840	652300	163360	4
254	1655;2031;2689			IPI00909683;IPI00028481;IPI00877662;IPI00024282;IPI00016373;IPI00556414;IPI00941177;IPI00790414;IPI00910170;IPI00061114;IPI00871276;IPI00023504;IPI00300562;IPI00032808	IPI00909683;IPI00028481;IPI00877662;IPI00024282;IPI00016373;IPI00556414;IPI00941177;IPI00790414	IPI00909683	3;3;2;2;2;2;2;2;1;1;1;1;1;1	2;2;1;1;1;1;1;1;1;1;1;1;1;1	2;2;1;1;1;1;1;1;1;1;1;1;1;1	cDNA FLJ53028, highly similar to Ras-related protein Rab-8A;Oncogene c-mel;Ras-related protein Rab-8A;Ras-related protein Rab-8B;cDNA FLJ52970, highly similar to Ras-related protein Rab-8B;Cell growth-inhibiting gene 4 protein;Ras-related protein Rab-13;RAB13 protein;Mel transforming oncogene variant	MEL;RAB8;RAB8A;RAB8B;GIG4;RAB13	cDNA FLJ53028, highly similar to Ras-related protein Rab-8A;Ras-related protein Rab-8A;similar to RAB13, member RAS oncogene family;Ras-related protein Rab-8B;Ras-related protein Rab-13;Mel transforming oncogene variant (Fragment);Putative uncharacterized	B4DEK7;P61006;Q92930;B4DMS1;P51153;Q504R6;Q59EP4;C9JHK4	14	3	2	2	3	3	3	3	2	2	2	2	2	2	2	2	15	9.7	9.7	23.564	207	2	2	2	2	5.5e-10	675750	147210	134460	249300	144770	161310	169270	250010	254110	4
531	307;1139;1579;1891;1913;1984;2089;2177;2211;2294;2563			IPI00909791;IPI00788599;IPI00008967;IPI00924916;IPI00940459;IPI00927208;IPI00922101;IPI00927015;IPI00927619	IPI00909791;IPI00788599;IPI00008967;IPI00924916;IPI00940459;IPI00927208	IPI00909791	11;11;10;8;8;6;4;2;2	11;11;10;8;8;6;4;2;2	11;11;10;8;8;6;4;2;2	cDNA FLJ54691, highly similar to Thromboxane-A synthase (EC 5.3.99.5);Putative uncharacterized protein TBXAS1;Cytochrome P450 5A1;Thromboxane-A synthase;HCG14925, isoform CRA_a;Thromboxane A synthase 1 (Platelet, cytochrome P450, family 5, subfamily A) isoform TXS-I variant;Thromboxane synthase;cDNA FLJ59444, highly similar to Thromboxane-A synthase (EC 5.3.99.5);HCG2044058;TBXAS1 protein;cDNA FL…	TBXAS1;CYP5;CYP5A1;hCG_14925;thromboxane synthase;hCG_2044058	thromboxane A synthase 1, platelet isoform 3;thromboxane A synthase 1, platelet isoform 1;thromboxane A synthase 1, platelet isoform 2;cDNA FLJ59444, highly similar to Thromboxane-A synthase;cDNA FLJ58823, highly similar to Thromboxane-A synthase;Putative	B4DJG6;C9J8N6;P24557;Q53F23;Q16843;Q86UL7;Q9UDV3;B4DVP1;Q96CN2;B4E0M5;C9JS68	9	11	11	11	10	10	9	10	10	10	9	10	10	10	9	10	20	20	20	65.763	580	10	10	9	10	1.91e-127	15147000	6485900	5064500	2122600	1473600	8699800	6958800	1606200	1682100	4
26	10			IPI00909904;IPI00002212;IPI00640104;IPI00552426	IPI00909904;IPI00002212;IPI00640104;IPI00552426	IPI00909904	1;1;1;1	1;1;1;1	1;1;1;1	Mammalian STE20-like protein kinase 3;Serine/threonine-protein kinase 24;STE20-like kinase MST3;cDNA FLJ60706, highly similar to Serine/threonine-protein kinase 24 (EC 2.7.11.1);cDNA FLJ61159, highly similar to Serine/threonine-protein kinase 24 (EC 2.7.11.1);cDNA FLJ61383, highly similar to Serine/threonine-protein kinase 24 (EC 2.7.11.1);Serine/threonine kinase 24 (STE20 homolog, yeast);Serine/…	MST3;STK24;STK3;hCG_27759;RP11-111L24.5-001;RP11-111L24.5-003;RP11-111L24.5-005	cDNA FLJ61383, highly similar to Serine/threonine-protein kinase 24;Isoform B of Serine/threonine-protein kinase 24;Serine/threonine kinase 24;Serine/threonine kinase 24	Q9Y6E0-2;Q9Y6E0;B4DMR0;B4DR80;B4DT57;Q5U0E6;Q9Y6E0-1;Q5JV92;Q6FG81;Q6P0Y1;Q5JV93;Q5JV98	4	1	1	1	1	1	1	0	1	1	1	0	1	1	1	0	3.3	3.3	3.3	49.997	450	1	1	1		0.0017313	40426	7781.6	6342	26302	0	0	0	26302	0	1
29	2162			IPI00910088;IPI00219794;IPI00032516;IPI00002552;IPI00910344	IPI00910088;IPI00219794;IPI00032516;IPI00002552;IPI00910344	IPI00910088	1;1;1;1;1	1;1;1;1;1	1;1;1;1;1	cDNA FLJ14622 fis, clone NT2RP2000147, highly similar to Adaptor-related protein complex 1 mu-1 subunit;Leukemia T cell specific adaptor-related protein 1 mu1 subunit;Adaptor-related protein complex 1, mu 1 subunit variant;Adaptor protein complex AP-1 mu-2 subunit;Adaptor-related protein complex 1 mu-2 subunit;AP-1 complex subunit mu-2;AP-mu chain family member mu1B;Clathrin assembly protein comp…	AP1M2;AP1M1;CLTNM	adaptor-related protein complex 1, mu 1 subunit isoform 1;Isoform 2 of AP-1 complex subunit mu-2;AP-1 complex subunit mu-1;Isoform 1 of AP-1 complex subunit mu-2;cDNA FLJ58317, highly similar to Adaptor-relatedprotein complex 1 mu-1 subunit	B3KNH5;Q4TTY5;Q59EK3;Q9Y6Q5-2;Q9Y6Q5;B3KN68;Q53GI5;Q9BXS5;B4DDG7;Q9Y6Q5-1;B4DN99	5	1	1	1	1	1	1	1	1	1	1	1	1	1	1	1	2.5	2.5	2.5	49.84	435	1	1	1	1	0.02333	162960	48854	40939	53028	20140	0	0	0	32207	1
122	2790			IPI00910593;IPI00015262;IPI00398735	IPI00910593;IPI00015262;IPI00398735	IPI00910593	1;1;1	1;1;1	1;1;1	cDNA FLJ52765, highly similar to Calponin-2;Calponin H2, smooth muscle;Calponin-2;Neutral calponin;cDNA FLJ52469, highly similar to Calponin-2;Calponin 2 isoform a variant;CNN2 protein;Calponin 2;Calponin 2, isoform CRA_a;cDNA FLJ44427 fis, clone UTERU2007724, highly similar to Homo sapiens calponin 2 (CNN2), transcript variant 2, mRNA;Putative uncharacterized protein CNN2	CNN2;hCG_21577	cDNA FLJ52765, highly similar to Calponin-2;Calponin-2;calponin 2 isoform b	B4DUT8;Q99439;A5D8U8;B4DDF4;Q53GK7;Q6FHC3;Q6FHE4;A6NFI4	3	1	1	1	1	1	1	1	1	1	1	1	1	1	1	1	5.2	5.2	5.2	35.943	330	1	1	1	1	9.76e-92	619600	83148	89625	314960	131860	0	0	0	210860	1
246	1098;1267;1805			IPI00910781;IPI00027497;IPI00908881;CON__Q3ZBD7	IPI00910781;IPI00027497;IPI00908881	IPI00910781	3;3;3;1	3;3;3;1	3;3;3;1	Glucose-6-phosphate isomerase;Autocrine motility factor;Neuroleukin;Phosphoglucose isomerase;Phosphohexose isomerase;Sperm antigen 36	GPI	Glucose-6-phosphate isomerase;Glucose-6-phosphate isomerase;Glucose-6-phosphate isomerase	B4DE36;B4DG39;P06744;B4DVJ0	4	3	3	3	3	3	3	3	3	3	3	3	3	3	3	3	7.4	7.4	7.4	64.324	569	4	4	4	4	1.28e-26	1568900	167700	175360	855070	370730	154240	165010	1021800	539020	4
566	2601			IPI00914566;IPI00914971	IPI00914566;IPI00914971	IPI00914566	1;1	1;1	1;1	Dimethylallyltranstransferase;Farnesyl diphosphate synthase;Farnesyl pyrophosphate synthase;Geranyltranstransferase	FDPS;FPS;KIAA1293	Farnesyl pyrophosphate synthetase;farnesyl diphosphate synthase isoform b	P14324	2	1	1	1	0	0	1	1	0	0	1	1	0	0	1	1	5.5	5.5	5.5	48.275	419			1	1	0.00042242	30953	0	0	18441	12512	0	0	17660	20789	2
82	390			IPI00914871;IPI00940397;IPI00009890;IPI00914848;IPI00917938;IPI00916528	IPI00914871;IPI00940397;IPI00009890;IPI00914848;IPI00917938;IPI00916528	IPI00914871	1;1;1;1;1;1	1;1;1;1;1;1	1;1;1;1;1;1	cDNA FLJ55211, highly similar to Glia-derived nexin;Glia-derived nexin;Peptidase inhibitor 7;Protease nexin 1;Protease nexin I;Serpin E2;cDNA FLJ51896, highly similar to Glia-derived nexin;Putative uncharacterized protein SERPINE2	PI7;PN1;SERPINE2	plasminogen activator inhibitor type 1, member 2 isoform c precursor;45 kDa protein;Isoform 1 of Glia-derived nexin;Isoform 2 of Glia-derived nexin;Putative uncharacterized protein SERPINE2;Putative uncharacterized protein SERPINE2	B4DIF2;P07093-1;P07093;P07093-2;B4DMR3;C9JYC8;C9JN98	6	1	1	1	1	1	1	1	1	1	1	1	1	1	1	1	4.4	4.4	4.4	45.266	409	1	1	1	1	4.77e-08	107100	40706	33298	23432	9667.5	71071	32007	17226	11365	4
328	377;1122;1564;1872;2455;3101			IPI00914949;IPI00216704;IPI00783228;IPI00237806;IPI00384172	IPI00914949;IPI00216704;IPI00783228;IPI00237806	IPI00914949	6;6;6;6;1	6;6;6;6;1	6;6;6;6;1	Spectrin, beta, erythrocytic (Includes spherocytosis, clinical type I) variant;Beta-I spectrin;Spectrin beta chain, erythrocyte;Spectrin, beta, erythrocytic;Beta-spectrin	SPTB;SPTB1;HSpTB1	Spectrin, beta, erythrocytic (Includes spherocytosis, clinical type I) variant (Fragment);Isoform 2 of Spectrin beta chain, erythrocyte;Isoform 1 of Spectrin beta chain, erythrocyte;Isoform 3 of Spectrin beta chain, erythrocyte	Q59FP5;P11277-2;P11277;B2RMN7;P11277-1;P11277-3;O14724;O14725;O14726;Q71VG0;Q71VG1;Q71VG2	5	6	6	6	6	5	3	5	6	5	3	5	6	5	3	5	3.7	3.7	3.7	268.24	2332	6	5	3	5	7.75e-52	1868200	972180	393430	176130	326430	1142500	428050	370660	447300	4
567	204;205;681;815;1647;2110			IPI00916434;IPI00954551;IPI00030205;IPI00384576;IPI00827560;IPI00828099;IPI00384402;IPI00387116;IPI00382491;IPI00382493;IPI00382497;IPI00382478	IPI00916434;IPI00954551;IPI00030205;IPI00384576;IPI00827560	IPI00916434	6;6;4;4;4;2;2;2;1;1;1;1	4;4;2;2;2;2;2;2;1;1;1;1	1;1;0;0;0;1;0;0;1;1;1;1	Anti-(ED-B) scFV;Anti-TN-C scFv;Anti-HCS scFv;Anti-FactorVIII scFv;Anti-IFN-G scFv;Anti-TeTox scFv;Ig kappa chain V-III region HAH;Ig kappa chain V-III region HIC;HRV Fab N27-VL;HRV Fab N28-VL		Anti-(ED-B) scFV (Fragment);Anti-(ED-B) scFV (Fragment);Ig kappa chain V-III region HAH;Ig kappa chain V-III region HIC;HRV Fab N27-VL (Fragment)	A2KBB9;A2KBC2;A2KBC3;A2KBC4;A2KBC5;A2KBC6;A2KBC7;A2KBC8;A2KBC0;A2KBC1;P18135;P18136;A2IPI2;A2IPI3	12	6	4	1	4	5	6	5	2	3	4	3	1	1	1	1	32.4	21.8	8	25.145	238	3	5	6	5	3.7e-252	49870000	1571300	1473600	39860000	6964500	994420	960990	44378000	8491500	4
287	17;497			IPI00916768;IPI00794543;IPI00075248;IPI00386621;IPI00915959;IPI00916600;IPI00216984	IPI00916768;IPI00794543;IPI00075248;IPI00386621;IPI00915959;IPI00916600;IPI00216984	IPI00916768	2;2;2;2;2;1;1	2;2;2;2;2;1;1	2;2;2;2;2;1;1	cDNA FLJ75174, highly similar to Homo sapiens calmodulin 1 (phosphorylase kinase, delta), mRNA;cDNA, FLJ96792, highly similar to Homo sapiens calmodulin 2 (phosphorylase kinase, delta) (CALM2), mRNA;Calmodulin;Calmodulin 1 (Phosphorylase kinase, delta), isoform CRA_a;Calmodulin 3 (Phosphorylase kinase, delta), isoform CRA_b;cDNA FLJ61744, highly similar to Calmodulin;CALM3 protein;Calmodulin-like…	CALM;CALM1;CALM2;CALM3;CALML2;CAM;CAM1;CAM2;CAM3;CAMB;CAMC;CAMIII;hCG_20313;hCG_21749;CALML3	21 kDa protein;cDNA FLJ75174, highly similar to Homo sapiens calmodulin 1 (phosphorylase kinase, delta), mRNA;Calmodulin;CALM3 protein;Putative uncharacterized protein CALM2;22 kDa protein;Calmodulin-like protein 3	A8K1M2;B2RDW0;P62158;B4DJ51;Q9BRL5;C9J9P9;P27482	7	2	2	2	2	2	2	2	2	2	2	2	2	2	2	2	11.2	11.2	11.2	20.762	187	2	2	2	2	4.59e-11	6324600	1290200	1011000	2623300	1400100	1391300	1110500	2811500	2431600	4
289	1379			IPI00917081;IPI00910110;IPI00941310;IPI00151710;IPI00942795;IPI00798252	IPI00917081;IPI00910110;IPI00941310;IPI00151710;IPI00942795;IPI00798252	IPI00917081	1;1;1;1;1;1	1;1;1;1;1;1	1;1;1;1;1;1	ANO6 protein;cDNA FLJ57678, highly similar to Transmembrane protein 16F;Putative uncharacterized protein ANO6;Anoctamin-6;Transmembrane protein 16F;cDNA FLJ59290, highly similar to Transmembrane protein 16F;cDNA FLJ44445 fis, clone UTERU2020718, highly similar to Transmembrane protein 16F	ANO6;TMEM16F	ANO6 protein;anoctamin 6 isoform c;Putative uncharacterized protein ANO6;Anoctamin-6;44 kDa protein;cDNA FLJ44445 fis, clone UTERU2020718, highly similar to Transmembrane protein 16F	B9EGG0;B4DZA5;C9JCS2;Q4KMQ2;B4E1V1;B3KX12	6	1	1	1	1	0	1	1	1	0	1	1	1	0	1	1	0.9	0.9	0.9	108.43	931	1		1	1	0.034214	313690	192320	0	80317	41052	316600	0	34117	27886	3
110	71;90;104;194;291;476;656;705;943;1080;1137;1150;1185;1334;1376;1438;1498;1510;1588;1637;1683;1771;1853;1897;1932;1969;2118;2130;2131;2203;2679;2683;2848;2879;2909;2971;3189	14	126	IPI00921118;IPI00759776;IPI00013508;IPI00909239;IPI00019884;IPI00903019	IPI00921118;IPI00759776;IPI00013508;IPI00909239	IPI00921118	37;37;37;37;8;1	37;37;37;37;8;1	24;24;24;24;2;0	Actinin alpha 1 isoform 3;ACTN1 protein;cDNA FLJ59209, highly similar to Alpha-actinin-1;Actinin alpha 1 isoform b;Alpha-actinin cytoskeletal isoform;Alpha-actinin-1;F-actin cross-linking protein;Non-muscle alpha-actinin-1;cDNA FLJ54432, highly similar to Alpha-actinin-1;Alpha-actinin 1;cDNA FLJ40884 fis, clone UTERU2000607, highly similar to Alpha-actinin-1;Actinin 1 smooth muscle variant;Actini…	ACTN1;hCG_22243	Actinin alpha 1 isoform 3;actinin, alpha 1 isoform a;Alpha-actinin-1;actinin, alpha 1 isoform c	B7TY16;A1L0V1;B4DHH3;Q1HE25;P12814;B7Z2W3;Q5ZEZ4;B3KUX9;B3V8S3;B4DFY0;B4DRP5;B7Z565;Q86TX4	6	37	37	24	35	34	35	37	35	34	35	37	22	21	22	24	54.9	54.9	38.7	107.14	930	49	50	49	52	0	288630000	70955000	56954000	104900000	55815000	86952000	72253000	114090000	81164000	4
24	1619;2027;2903;3028			IPI00922511;IPI00001754;IPI00940512;IPI00069985;IPI00922549	IPI00922511;IPI00001754;IPI00940512;IPI00069985;IPI00922549	IPI00922511	4;4;4;4;2	4;4;4;4;2	4;4;4;4;2	cDNA FLJ54854, highly similar to Junctional adhesion molecule A;Junctional adhesion molecule 1;Junctional adhesion molecule A;Platelet adhesion molecule 1;Platelet F11 receptor;cDNA FLJ90671 fis, clone PLACE1005544, highly similar to Junctional adhesion molecule 1;F11 receptor;F11 receptor protein;F11 receptor, isoform CRA_c;F11R protein;JAM1;Junction adhesion molecule;cDNA FLJ59609, highly simil…	F11R;JAM1;JCAM;UNQ264/PRO301;hCG_20857;RP11-544M22.2-001	cDNA FLJ54854, highly similar to Junctional adhesion molecule A;Junctional adhesion molecule A;30 kDa protein;Junction adhesion molecule;cDNA FLJ59609, highly similar to Junctional adhesion molecule A	B7Z5W1;Q9Y624;Q6FIB4;Q9Y5B2;B7Z941	5	4	4	4	4	4	3	4	4	4	3	4	4	4	3	4	18.5	18.5	18.5	32.858	303	4	4	3	4	9.88e-25	7762400	3219000	2548000	1354800	640570	4103300	3669100	1140000	692160	4
59	2036;2076;3124			IPI00924574;IPI00006662;REV__IPI00166138;IPI00927914;IPI00910432	IPI00924574;IPI00006662	IPI00924574	3;3;1;1;1	3;3;1;1;1	3;3;1;1;1	Putative uncharacterized protein APOD;Apolipoprotein D	APOD	Putative uncharacterized protein APOD;Apolipoprotein D	C9JF17;P05090	5	3	3	3	3	3	3	3	3	3	3	3	3	3	3	3	14	14	14	24.158	215	3	3	3	3	2.55e-08	3255900	666260	624340	672020	1293300	588540	931910	429780	2412300	4
544	813			IPI00924820;IPI00829827	IPI00924820;IPI00829827	IPI00924820	1;1	1;1	1;1			Putative uncharacterized protein ENSP00000419300;13 kDa protein	C9JVV8	2	1	1	1	1	1	1	1	1	1	1	1	1	1	1	1	10.8	10.8	10.8	13.079	120	1	1	1	1	0.00096212	815310	66246	175540	162280	411250	26041	74589	52735	976230	4
498	40;602;1359;1818;2340;2612;2919			IPI00925052;IPI00925334;IPI00554811;IPI00926054;IPI00790262;IPI00926232;IPI00607772;IPI00386354;IPI00924833;IPI00925522	IPI00925052;IPI00925334;IPI00554811;IPI00926054;IPI00790262;IPI00926232;IPI00607772	IPI00925052	7;7;7;5;4;4;4;3;1;1	7;7;7;5;4;4;4;3;1;1	7;7;7;5;4;4;4;3;1;1	Putative uncharacterized protein ARPC4;Actin-related protein 2/3 complex subunit 4;Arp2/3 complex 20 kDa subunit	ARPC4;ARC20	Putative uncharacterized protein ARPC4;Putative uncharacterized protein ARPC4;Actin-related protein 2/3 complex subunit 4;Putative uncharacterized protein ARPC4;Similar to Actin-related protein 2/3 complex subunit 4;Putative uncharacterized protein ARPC4;a	C9JWM7;C9J0N8;P59998;C9JUB3;C9JE29;C9JJ59	10	7	7	7	7	7	7	7	7	7	7	7	7	7	7	7	46.5	46.5	46.5	21.588	187	7	7	7	7	4.83e-35	10980000	3054200	2066400	3652300	2207100	3494100	3089000	3854700	3140200	4
347	313;1572			IPI00926491;IPI00219291;IPI00220300;IPI00456013;IPI00719814	IPI00926491;IPI00219291;IPI00220300;IPI00456013;IPI00719814	IPI00926491	2;2;2;2;2	2;2;2;2;2	2;2;2;2;2	cDNA FLJ56092, highly similar to Pentatricopeptide repeat protein 1;Pentatricopeptide repeat domain 1;ATP synthase subunit f, mitochondrial;Putative uncharacterized protein ATP5J2;ATP synthase, H+ transporting, mitochondrial F0 complex, subunit f isoform 2a variant;ATP synthase, H+ transporting, mitochondrial F0 complex, subunit f, isoform 2;ATP synthase, H+ transporting, mitochondrial F0 complex…	PTCD1;ATP5J2;ATP5JL;hCG_2023419;tcag7.652	cDNA FLJ56092, highly similar to Pentatricopeptide repeat protein 1;Putative uncharacterized protein ATP5J2;Isoform 1 of ATP synthase subunit f, mitochondrial;ATP synthase, H+ transporting, mitochondrial F0 complex, subunit F2 isoform 2c;ATP synthase, H+ t	B4DJ38;Q3ZB84;P56134-2;P56134;C9JU26;P56134-1;Q53FE1;Q6IBB3;A6ND55;C9J108	5	2	2	2	2	2	2	2	2	2	2	2	2	2	2	2	3.2	3.2	3.2	84.109	749	2	2	2	2	2.18e-23	1268900	512340	384550	262990	109030	698830	515280	224440	121360	4
428	635;1416;1422;2246			IPI00926581;IPI00941217;IPI00607818;IPI00337335;IPI00607778;IPI00029818	IPI00926581;IPI00941217;IPI00607818;IPI00337335;IPI00607778;IPI00029818	IPI00926581	4;4;4;4;3;3	1;1;1;1;1;1	1;1;1;1;1;1	MYH14 variant protein;Myosin heavy chain 14;Myosin heavy chain, non-muscle IIc;Myosin-14;Non-muscle myosin heavy chain IIc;Nonmuscle myosin heavy chain II-C variant;MYH14 protein;cDNA FLJ43092 fis, clone COLON2002520, highly similar to Myosin-14;cDNA FLJ56368, highly similar to Myosin-14;Myosin;cDNA FLJ16179 fis, clone BRHIP3000070, highly similar to Myosin-14	FP17425;KIAA2034;MYH14	myosin, heavy chain 14 isoform 3;Isoform 2 of Myosin-14;myosin, heavy chain 14 isoform 1;Isoform 1 of Myosin-14;Isoform 4 of Myosin-14;Isoform 5 of Myosin-14	B0I1S2;Q7Z406-2;Q7Z406;C3TTN4;Q7Z406-1;A1L2Z2;B3KWH4;B4E177;Q14780;Q7Z406-4;B3KV65;Q7Z406-5	6	4	1	1	4	4	4	4	1	1	1	1	1	1	1	1	2.4	0.6	0.6	232.01	2036	1	1	1	1	7.96e-100	19674000	8362900	6537300	2674800	2099300	11234000	8974200	1906600	2581100	4
568	2222;3018			IPI00926625;IPI00941977;IPI00871311;IPI00926316;IPI00925876;IPI00924931	IPI00926625;IPI00941977;IPI00871311;IPI00926316;IPI00925876;IPI00924931	IPI00926625	2;1;1;1;1;1	2;1;1;1;1;1	2;1;1;1;1;1	Zyxin;Zyxin-2;cDNA FLJ61463, highly similar to Zyxin;ESP-2;ZYX protein;cDNA FLJ53160, highly similar to Zyxin;cDNA FLJ53163, highly similar to Zyxin;cDNA, FLJ79126, highly similar to Zyxin;Zyxin, isoform CRA_a;Putative uncharacterized protein ZYX	ZYX;hCG_96060	Zyxin;ZYX protein (Fragment);cDNA FLJ53160, highly similar to Zyxin;Zyxin, isoform CRA_a;Putative uncharacterized protein ZYX;Putative uncharacterized protein ZYX	Q15942;B4DY85;Q28617;Q96AF9;Q9BUS0;B4DQR8;B4DQX7;C9JXY0;C9IZ41	6	2	2	2	1	1	1	2	1	1	1	2	1	1	1	2	6.1	6.1	6.1	61.277	572	1	1	1	3	5.75e-14	235490	20374	27395	83595	104130	19262	31712	98163	161440	4
518	253;1177;1656;1912;2528;2768;3093			IPI00926935;IPI00748145;IPI00925504;IPI00217906;IPI00925691;IPI00924427;IPI00794986;IPI00337415;IPI00796250;IPI00220578;IPI00398700;IPI00925531;IPI00095891;IPI00646491;IPI00788932;IPI00640867;IPI00514055;IPI00006395;IPI00219835;IPI00644936;IPI00248911;IPI00220281;IPI00217269;IPI00218488;IPI00329305;IPI00644474;IPI00792774;IPI00645002;IPI00925310;IPI00647637;IPI00941962	IPI00926935;IPI00748145;IPI00925504;IPI00217906;IPI00925691;IPI00924427;IPI00794986;IPI00337415;IPI00796250	IPI00926935	7;7;6;6;6;6;5;4;4;3;3;3;2;2;2;2;2;2;2;2;2;2;2;2;2;1;1;1;1;1;1	7;7;6;6;6;6;5;4;4;3;3;3;2;2;2;2;2;2;2;2;2;2;2;2;2;1;1;1;1;1;1	7;7;6;6;6;6;5;4;4;3;3;3;2;2;2;2;2;2;2;2;2;2;2;2;2;1;1;1;1;1;1	Galphai2 protein;Adenylate cyclase-inhibiting G alpha protein;Guanine nucleotide-binding protein G(i) subunit alpha-2;GTP-binding regulatory protein Gi alpha-2 chain;GNAI2 protein;Guanine nucleotide binding protein (G protein), alpha inhibiting activity polypeptide 2;cDNA FLJ38980 fis, clone NT2RI2004884, highly similar to Guanine nucleotide-binding protein G(i), alpha-2 subunit;cDNA FLJ39276 fis…	GNAI2;GNAI2B;WUGSC:H_LUCA16.1;hCG_1997820;WUGSC:H_LUCA15.1;GNAI1	Galphai2 protein;Isoform 1 of Guanine nucleotide-binding protein G(i), alpha-2 subunit;cDNA FLJ39276 fis, clone OCBBF2010843, highly similar to Guanine nucleotide-binding protein G(i), alpha-2 subunit;Isoform 2 of Guanine nucleotide-binding protein G(i), a	Q6B6N3;P04899-1;P04899;Q93020;Q96C71;B3KTZ0;P04899-2;B3KX51;B4DYA0;B3KP24;B4E2X5;Q6LCB5;P63096;B4E2V1;O43383	31	7	7	7	7	7	7	7	7	7	7	7	7	7	7	7	25.7	25.7	25.7	41.548	366	8	9	9	9	9.43e-121	15483000	5850700	5075800	2801100	1755700	8081700	7079700	2024700	2136700	4
569	486;3242			IPI00927606;IPI00293975;IPI00398780	IPI00927606;IPI00293975;IPI00398780	IPI00927606	2;1;1	2;1;1	2;1;1	Cellular glutathione peroxidase;Glutathione peroxidase 1;Glutathione peroxidase	GPX1	glutathione peroxidase 1 isoform 1;16 kDa protein;glutathione peroxidase 1 isoform 2	P07203;Q6NSD4	3	2	2	2	2	2	2	2	2	2	2	2	2	2	2	2	13.3	13.3	13.3	22.041	203	2	2	2	2	2.78e-14	1939500	687650	428660	556170	266990	873270	504620	578050	419470	4
43	474;2838			IPI00930068;IPI00796379;IPI00004656;IPI00941461	IPI00930068;IPI00796379;IPI00004656;IPI00941461	IPI00930068	2;2;2;2	2;2;2;2	2;2;2;2	Beta-2-microglobulin;cDNA FLJ57067, highly similar to Beta-2-microglobulin;Beta-2-microglobulin form pI 5.3;Beta 2-microglobulin protein	B2M;CDABP0092;HDCMA22P;beta 2-microglobulin	Beta-2-microglobulin;cDNA FLJ57067, highly similar to Beta-2-microglobulin;Beta-2-microglobulin;Beta-2-microglobulin	A6XMH4;B4E0X1;P61769;A6XND9;A6XMH5;Q9UM88	4	2	2	2	2	2	2	2	2	2	2	2	2	2	2	2	21.8	21.8	21.8	14.416	124	3	3	3	3	2.94e-06	10290000	3352000	3360800	2418400	1158800	4315300	4782900	2140200	1482300	4
336	52;237;468;571;714;718;1227;1521;1616;2045;2243;2244;2675;2874			IPI00930688;IPI00218343;IPI00792677;IPI00387144;IPI00180675;CON__ENSEMBL:ENSBTAP00000016242;IPI00793930;IPI00179709;IPI00915791;IPI00936821;IPI00478908;IPI00410402;IPI00873427;IPI00218345;IPI00166768;IPI00909762;IPI00784332;IPI00795002	IPI00930688;IPI00218343;IPI00792677;IPI00387144;IPI00180675;CON__ENSEMBL:ENSBTAP00000016242;IPI00793930;IPI00179709;IPI00915791;IPI00936821;IPI00478908;IPI00410402;IPI00873427;IPI00218345;IPI00166768	IPI00930688	14;14;14;13;13;13;12;10;10;9;9;8;8;8;8;6;5;5	14;14;14;13;13;13;12;10;10;9;9;8;8;8;8;6;5;5	4;4;4;3;4;4;3;2;2;2;3;2;1;2;4;2;1;3	Alpha-tubulin ubiquitous;Tubulin alpha-1B chain;Tubulin alpha-ubiquitous chain;Tubulin K-alpha-1;cDNA FLJ78587;cDNA FLJ32131 fis, clone PEBLM2000267, highly similar to Tubulin alpha-ubiquitous chain;cDNA FLJ37398 fis, clone BRAMY2027467, highly similar to Tubulin alpha-ubiquitous chain;Alpha-tubulin 6;Tubulin alpha-1C chain;Tubulin alpha-6 chain;Tubulin alpha 6 variant;cDNA FLJ60097, highly simil…	TUBA1B;TUBA1C;TUBA6;TUBA1A;TUBA3;TUBA2;TUBA3C;TUBA3D;hCG_19100;TUBA3E	Tubulin alpha-1B chain;Tubulin alpha-1C chain;cDNA FLJ60097, highly similar to Tubulin alpha-ubiquitous chain;cDNA FLJ55956, highly similar to Tubulin alpha-6 chain;Tubulin alpha-1A chain;>ENSEMBL:ENSBTAP00000016242 (Bos taurus) similar to alpha-tubulin I	P68363;A8JZY9;B3KPS3;B3KT06;Q9BQE3;Q53GA7;B4DDU2;B7Z1K5;Q71U36;A8K0B8;Q9UQM3;Q8WU19;Q13748-1;Q13748;Q1ZYQ1;B4DQK4;Q6PEY2;A6NCC1;Q13748-2;Q8N532	18	14	14	4	14	13	14	14	14	13	14	14	4	4	4	4	43.7	43.7	12	50.151	451	18	16	18	18	7.72e-204	103950000	25384000	27118000	30586000	20866000	29958000	38008000	30209000	31942000	4
489	430;2155			IPI00936846;IPI00552852;IPI00550162;IPI00552771	IPI00936846;IPI00552852;IPI00550162;IPI00552771	IPI00936846	2;2;2;1	2;2;2;1	1;1;1;1	V2-19 protein;V2-17 protein;V2-11 protein	IGLV3-27;V2-19;IGLV3-25;V2-17;IGLV3-16;V2-11	similar to hCG2040019;V2-19 protein;V2-17 protein;V2-11 protein	Q5NV91;Q5NV90;Q5NV64	4	2	2	1	2	2	2	2	2	2	2	2	1	1	1	1	3.4	3.4	1.7	68.405	645	3	3	4	3	5.46e-06	3502400	386750	302530	2190100	622990	512980	409650	1369600	1757500	4
283	187;271;1698;1992;2484;2927;2947;3114			IPI00937584;IPI00382605;IPI00478543;IPI00043083;IPI00879834;IPI00877647;IPI00018963;IPI00880124;IPI00922277	IPI00937584;IPI00382605;IPI00478543;IPI00043083;IPI00879834;IPI00877647	IPI00937584	8;8;8;8;8;4;2;2;1	8;8;8;8;8;4;2;2;1	8;8;8;8;8;4;2;2;1	Putative uncharacterized protein PARVB;Parvin, beta;Parvin, beta, isoform CRA_a;CLINT;Affixin;Beta-parvin	PARVB;AL031595.1-001;hCG_17295;CGI-56;AL031595.1-003;AL031595.1-004	Putative uncharacterized protein PARVB;parvin, beta isoform a;Putative uncharacterized protein PARVB;Beta-parvin;Parvin, beta;Parvin, beta	B5MDI0;B0QYN1;Q96PN1;A6NG58;Q9HBI1;B0QYM8;B0QYP8	9	8	8	8	8	7	7	8	8	7	7	8	8	7	7	8	26.4	26.4	26.4	45.116	397	9	8	8	9	5.77e-107	25119000	4948800	4146200	10060000	5964800	4916800	5784800	11869000	8435200	4
366	2043			IPI00938079;IPI00246058	IPI00938079;IPI00246058	IPI00938079	1;1	1;1	1;1	cDNA FLJ55458, highly similar to Programmed cell death 6-interacting protein;cDNA FLJ56126, highly similar to Programmed cell death 6-interacting protein;Dopamine receptor interacting protein 4;PDCD6IP protein;ALG-2-interacting protein 1;Hp95;Programmed cell death 6-interacting protein	DRIP4;PDCD6IP;AIP1;ALIX;KIAA1375	programmed cell death 6 interacting protein isoform 2;Programmed cell death 6-interacting protein	B4DHD2;B7Z5C1;Q4W4Y1;Q6NUS1;Q8WUM4	2	1	1	1	1	1	1	0	1	1	1	0	1	1	1	0	1.9	1.9	1.9	96.771	873	1	1	1		0.025193	35749	6830.7	7657.3	21262	0	4805.7	5823.3	28907	0	3
575	151;817;2156;3044;3253			IPI00939270;IPI00941543;IPI00940101;IPI00940807;IPI00829640;IPI00943342;IPI00939627;IPI00893178;IPI00719373;IPI00815938;IPI00852577;IPI00829740	IPI00939270;IPI00941543;IPI00940101;IPI00940807;IPI00829640;IPI00943342;IPI00939627;IPI00893178;IPI00719373	IPI00939270	5;5;3;3;3;3;3;3;3;2;2;1	5;5;3;3;3;3;3;3;3;2;2;1	1;1;1;1;1;1;1;1;1;0;1;0	IGL@ protein	IGL@	25 kDa protein;25 kDa protein;25 kDa protein;25 kDa protein;IGL@ protein;25 kDa protein;25 kDa protein;23 kDa protein;IGL@ protein	Q6GMW4;Q6NS95	12	5	5	1	5	5	5	5	5	5	5	5	1	1	1	1	34.3	34.3	8.2	24.843	233	8	9	9	9	3.77e-92	336780000	9267800	18849000	280170000	28487000	4087500	13068000	318910000	25522000	4
577	446;1648;2371;2789;2826;2827;2999			IPI00940069;IPI00936553;IPI00385253;IPI00892594;IPI00945429;IPI00829834;IPI00549330;IPI00387119;IPI00387097	IPI00940069	IPI00940069	7;1;1;1;1;1;1;1;1	1;1;1;1;1;1;1;1;1	0;0;0;0;0;0;0;0;0	Ig kappa chain C region	IGKC	Ig kappa chain C region	P01834	9	7	1	0	7	7	7	7	1	1	1	1	0	0	0	0	28.2	3.8	0	25.451	234	1	1	1	1	2.72e-203	4709500	255320	384490	2354200	1715500	162730	311600	2441200	2993500	4
578	29;524;531;619;1103;1316;1317;1831;1832;2239;2334;2335;2454			IPI00940084;IPI00216135;IPI00296039;IPI00018853	IPI00940084;IPI00216135;IPI00296039;IPI00018853	IPI00940084	13;12;10;10	2;1;1;0	0;0;0;0	Alpha-tropomyosin;Tropomyosin alpha-1 chain;Tropomyosin-1;TPMsk1;Tropomyosin isoform	C15orf13;TMSA;TPM1	37 kDa protein;Isoform 3 of Tropomyosin alpha-1 chain;Isoform 4 of Tropomyosin alpha-1 chain;Tropomyosin isoform	P09493-3;P09493;P09493-4;Q8TCG4;Q15657	4	13	2	0	13	13	11	12	2	2	2	2	0	0	0	0	36	7.6	0	36.517	317	3	3	3	2	4.21e-77	2511700	489610	502060	1195800	324190	540670	548670	1517000	356680	4
18	21;524;531;619;1103;1316;1317;1831;1832;2239;2334;2335;2454			IPI00940343;IPI00000230;IPI00604537;IPI00915324;IPI00941861;IPI00014581;IPI00442894;IPI00793630	IPI00940343;IPI00000230;IPI00604537;IPI00915324;IPI00941861;IPI00014581;IPI00442894	IPI00940343	13;13;12;11;10;10;7;2	1;1;1;1;1;1;1;0	0;0;0;0;0;0;0;0	cDNA FLJ16459 fis, clone BRCAN2002473, moderately similar to Tropomyosin, fibroblast isoform 2;Tropomyosin 1 (Alpha), isoform CRA_f;Putative uncharacterized protein DKFZp586K2222;Tropomyosin 1 (Alpha), isoform CRA_a;Alpha-tropomyosin;Tropomyosin alpha-1 chain;Tropomyosin-1;Putative uncharacterized protein TPM1;Tropomyosin 1 (Alpha), isoform CRA_o;cDNA FLJ26372 fis, clone HRT06233	hCG_33495;TPM1;DKFZp586K2222;C15orf13;TMSA	Tropomyosin 1 (Alpha), isoform CRA_f;tropomyosin 1 alpha chain isoform 2;tropomyosin 1 alpha chain isoform 3;Isoform 6 of Tropomyosin alpha-1 chain;Tropomyosin 1 (Alpha), isoform CRA_o;Isoform 1 of Tropomyosin alpha-1 chain;cDNA FLJ26372 fis, clone HRT0623	Q6ZN40;Q9Y427;P09493-6;P09493;C9IZA2;P09493-1;Q6ZP76	8	13	1	0	13	13	11	12	1	1	0	1	0	0	0	0	35.3	3.4	0	37.452	326	1	1		1	3.78e-77	157200	39598	65353	0	52249	38142	90888	0	87877	3
299	132;453;632;634;912;1015;1017;3068;3127	41	338	IPI00940451;IPI00939826;IPI00930684;IPI00418153;IPI00941837;IPI00168728;IPI00942113;IPI00827754	IPI00940451;IPI00939826;IPI00930684;IPI00418153;IPI00941837;IPI00168728;IPI00942113;IPI00827754	IPI00940451	9;9;9;9;9;9;9;9	2;2;2;2;2;2;2;2	2;2;2;2;2;2;2;2	Putative uncharacterized protein;Putative uncharacterized protein DKFZp686I15212;FLJ00385 protein;HDC;Heavy chain disease protein;Ig gamma-3 chain C region;Full-length cDNA clone CS0DI019YF20 of Placenta of Homo sapiens (human)	DKFZp686I15212;FLJ00385;IGHG3	59 kDa protein;57 kDa protein;Putative uncharacterized protein;Putative uncharacterized protein DKFZp686I15212;56 kDa protein;FLJ00385 protein (Fragment);56 kDa protein;Ig gamma-3 chain C region	Q5EBM2;Q6N030;Q8NF17;P01860;Q86TT2	8	9	2	2	9	9	9	9	2	2	2	2	2	2	2	2	19.1	9.6	9.6	58.99	533	3	3	3	3	1.77e-51	41624000	1561300	2769500	31198000	6094800	746990	1576000	39927000	4204500	4
193	1034;2381;2382;2756;2757;3230;3231;3257			IPI00940791;IPI00855916;IPI00022432;IPI00646384	IPI00940791;IPI00855916;IPI00022432;IPI00646384	IPI00940791	8;8;8;4	8;8;8;4	8;8;8;4	Transthyretin;ATTR;Prealbumin;TBPA;TTR;Transthyretin amyloidosis variant F33V;Transthyretin amyloidosis variant D38V	PALB;TTR;transthyretin/ TTR	20 kDa protein;Transthyretin;Transthyretin;13 kDa protein	A6XGL1;P02766;A6XMH1;Q53WY6;Q8TDB1;Q8TDB2	4	8	8	8	8	8	8	8	8	8	8	8	8	8	8	8	42.2	42.2	42.2	20.145	185	11	11	10	11	1.16e-95	40748000	9612300	11469000	4473700	15193000	10768000	14263000	2935100	27426000	4
400	31;407;1032;1606;1697;1876;2890			IPI00940936;IPI00298625;IPI00432416;IPI00646510;IPI00029769;IPI00946853;IPI00797424	IPI00940936;IPI00298625;IPI00432416	IPI00940936	7;7;7;2;2;2;2	7;7;7;2;2;2;2	6;6;6;1;1;1;2	LYN protein;Tyrosine-protein kinase Lyn;cDNA FLJ75641, highly similar to Homo sapiens v-yes-1 Yamaguchi sarcoma viral related oncogene homolog (LYN), mRNA;cDNA FLJ56471, highly similar to Tyrosine-protein kinase Lyn (EC 2.7.10.2)	LYN	LYN protein (Fragment);Isoform LYN A of Tyrosine-protein kinase Lyn;Isoform LYN B of Tyrosine-protein kinase Lyn	Q6NUK7;P07948-1;P07948;A8K379;P07948-2;B4DQ79	7	7	7	6	7	6	5	5	7	6	5	5	6	5	4	4	18.7	18.7	17.4	65.808	582	7	6	5	5	5.41e-53	3528400	1235900	922960	904750	464730	1447400	1059200	1157000	686230	4
580	446;2001;2371;2789;2826;2827;2999			IPI00940952;IPI00830122	IPI00940952	IPI00940952	7;1	1;1	0;0	Immunoblobulin light chain		Ig kappa chain C region	Q0KKI6	2	7	1	0	7	7	7	7	1	1	1	1	0	0	0	0	28	3.8	0	25.917	236	1	1	1	1	5.54e-204	987760	30351	40175	615430	301800	7254.3	10380	678790	490870	4
581	198;199;446;1653;2371;2789;2826;2827;2999			IPI00941650;IPI00829751;IPI00952572	IPI00941650	IPI00941650	9;3;1	9;3;1	0;0;0			26 kDa protein		3	9	9	0	7	7	9	8	7	7	9	8	0	0	0	0	38.6	38.6	0	25.693	236	26	23	42	33	2.24e-247	548000000	31456000	35273000	379200000	102080000	21515000	27627000	427460000	150000000	4
309	710			IPI00941721;IPI00795221;IPI00396552;IPI00941187;IPI00218604;IPI00183046	IPI00941721;IPI00795221;IPI00396552;IPI00941187;IPI00218604;IPI00183046	IPI00941721	1;1;1;1;1;1	1;1;1;1;1;1	1;1;1;1;1;1	Protein tyrosine phosphatase, non-receptor type 6, isoform CRA_b;Putative uncharacterized protein PTPN6;70 kDa SHP-1L protein;Hematopoietic cell protein-tyrosine phosphatase;Protein-tyrosine phosphatase 1C;Protein-tyrosine phosphatase SHP-1;SH-PTP1;Tyrosine-protein phosphatase non-receptor type 6;Protein tyrosine phosphatase, non-receptor type 6 isoform 1 variant;cDNA, FLJ93911, Homo sapiens prot…	hCG_25941;PTPN6;HCP;PTP1C	Putative uncharacterized protein PTPN6;protein tyrosine phosphatase, non-receptor type 6 isoform 3;Isoform 2 of Tyrosine-protein phosphatase non-receptor type 6;68 kDa protein;Isoform 1 of Tyrosine-protein phosphatase non-receptor type 6;Isoform 3 of Tyros	C9JG49;Q9UK67;P29350-3;P29350;Q53EL0;Q53XS4;P29350-1;B4DPS0;B4DTD7;P29350-2	6	1	1	1	0	1	1	1	0	1	1	1	0	1	1	1	3.4	3.4	3.4	70.289	626		1	1	1	2.95e-08	240270	0	31976	121040	87255	0	25152	123890	153340	3
582	320;902;960;1056;2119;2231;2291;2851;3021;3022;3039;3243;3254	65	529	IPI00941961;IPI00940716;IPI00939620;IPI00941355;IPI00940918;IPI00946337;IPI00896380;IPI00892870;IPI00952640;IPI00479708;IPI00385264;IPI00384395;IPI00828053;IPI00828138;IPI00828186;IPI00827836;IPI00827774;IPI00384394;IPI00827886;IPI00827499;IPI00827933;IPI00827618;IPI00827827;IPI00827576;IPI00827550;IPI00827500;IPI00828088	IPI00941961;IPI00940716;IPI00939620;IPI00941355;IPI00940918;IPI00946337;IPI00896380;IPI00892870;IPI00952640;IPI00479708;IPI00385264	IPI00941961	13;12;12;12;12;12;12;12;12;10;7;1;1;1;1;1;1;1;1;1;1;1;1;1;1;1;1	13;12;12;12;12;12;12;12;12;10;7;1;1;1;1;1;1;1;1;1;1;1;1;1;1;1;1	13;12;12;12;12;12;12;12;12;10;7;1;1;1;1;1;1;1;1;1;1;1;1;1;1;1;1	Ig mu chain C region;Full-length cDNA clone CS0DD006YL02 of Neuroblastoma of Homo sapiens (human);BOT;Ig mu heavy chain disease protein	IGHM	66 kDa protein;Putative uncharacterized protein IGHV3-6 (Fragment);Putative uncharacterized protein IGHV3-6 (Fragment);Putative uncharacterized protein IGHV3-6 (Fragment);Putative uncharacterized protein IGHV3-6 (Fragment);Putative uncharacterized protein	C9J195;C9K069;C9JZJ8;C9JJG5;C9J7C9;P01871-2;P01871;C9IZI6;P01871-1;Q86TT1;P04220	27	13	13	13	13	13	13	13	13	13	13	13	13	13	13	13	22.2	22.2	22.2	65.688	599	23	23	23	22	1.96e-157	910020000	30955000	106100000	750280000	22688000	15807000	89417000	843830000	13686000	4
75	1530			IPI00942239;IPI00748037;IPI00009253;IPI00908301;IPI00748905	IPI00942239;IPI00748037;IPI00009253;IPI00908301;IPI00748905	IPI00942239	1;1;1;1;1	1;1;1;1;1	1;1;1;1;1	cDNA FLJ52546, highly similar to Beta-soluble NSF attachment protein;Beta-soluble NSF attachment protein;N-ethylmaleimide-sensitive factor attachment protein beta;cDNA FLJ54102, highly similar to Beta-soluble NSF attachment protein;Alpha-soluble NSF attachment protein;N-ethylmaleimide-sensitive factor attachment protein alpha;cDNA FLJ52551, highly similar to Beta-soluble NSF attachment protein;NA…	NAPB;SNAPB;NAPA;SNAPA;hCG_22369	cDNA FLJ52546, highly similar to Beta-soluble NSF attachment protein;Beta-soluble NSF attachment protein;Alpha-soluble NSF attachment protein;cDNA FLJ52551, highly similar to Beta-soluble NSF attachment protein;N-ethylmaleimide-sensitive factor attachment	B4DIV0;Q9H115;B4DGP9;P54920;B4DK44;Q4G0M0	5	1	1	1	1	1	1	1	1	1	1	1	1	1	1	1	3.6	3.6	3.6	34.064	303	1	1	1	1	4.12e-10	436790	111320	87419	167360	70692	133200	107060	172550	116560	4
583	446;1652;2371;2789;2826;2827;2999			IPI00942387;IPI00430847;IPI00827906	IPI00942387	IPI00942387	7;1;1	1;1;1	0;0;0			26 kDa protein		3	7	1	0	7	7	7	7	1	1	1	1	0	0	0	0	30.9	6.8	0	25.559	236	1	1	1	1	5.34e-202	3441500	206670	28621	2693700	512410	38410	5749.8	3118500	637990	4
519	260;971;1007;1033;1065;1741;1808;2539;2711;3108			IPI00943099;IPI00748955	IPI00943099;IPI00748955	IPI00943099	10;10	10;10	10;10	Antigen CD42b-alpha;Glycocalicin;Platelet glycoprotein Ib alpha chain;Platelet glycoprotein Ib alpha polypeptide;Glycoprotein Ib alpha polypeptide	GP1BA	70 kDa protein;Platelet glycoprotein Ib alpha chain	P07359;A5CKE2;Q06AK0	2	10	10	10	10	10	9	10	10	10	9	10	10	10	9	10	15	15	15	70.344	640	11	11	9	11	8.9e-32	30130000	12023000	11038000	4217300	2850900	15310000	15798000	3283800	3361500	4
440	54			IPI00943181;IPI00384051;IPI00746205;IPI00941428	IPI00943181;IPI00384051;IPI00746205;IPI00941428	IPI00943181	1;1;1;1	1;1;1;1	1;1;1;1	Putative uncharacterized protein PSME2;11S regulator complex subunit beta;Activator of multicatalytic protease subunit 2;Proteasome activator 28 subunit beta;Proteasome activator complex subunit 2;Cell migration-inducing protein 22;PSME2 protein;Full-length cDNA clone CS0DJ015YJ12 of T cells (Jurkat cell line) of Homo sapiens (human)	PSME2	Putative uncharacterized protein PSME2;Putative uncharacterized protein PSME2;proteasome activator subunit 2;27 kDa protein	C9JE52;Q9UL46;A8MZ76;Q2TNB3;Q6FHK9;Q86SZ7	4	1	1	1	1	1	1	1	1	1	1	1	1	1	1	1	6.3	6.3	6.3	29.126	254	1	1	1	1	9.55e-05	347160	56810	43085	176240	71026	44862	36778	214060	119170	4
450	350;1651;2132	52	24	IPI00943265;IPI00386133;IPI00386132;IPI00387120;IPI00385143;IPI00383808	IPI00943265;IPI00386133;IPI00386132;IPI00387120;IPI00385143	IPI00943265	3;3;3;3;2;1	3;3;3;3;2;1	3;3;3;3;2;1	Ig kappa chain V-IV region;Ig kappa chain V-IV region B17;Ig kappa chain V-IV region JI;Ig kappa chain V-IV region Len;Microfibrillar protein 2	IGKV4-1	Similar to Ig kappa chain V-IV region precursor;Ig kappa chain V-IV region B17;Ig kappa chain V-IV region JI;Ig kappa chain V-IV region Len;Microfibrillar protein 2 (Fragment)	P06312;P06314;P06313;P01625;Q9NP29	6	3	3	3	1	2	3	3	1	2	3	3	1	2	3	3	20	20	20	19.518	180	2	3	5	4	1.93e-71	48992000	780250	1631300	40039000	6540700	677440	1354400	44643000	6901300	4
333	26;415;1250;1589;1865;1943;2074;2123;2245;2514;2654;3030;3179			IPI00944960;IPI00896419;IPI00218192;IPI00896413;IPI00922043;IPI00791097;IPI00556036;IPI00798006	IPI00944960;IPI00896419;IPI00218192;IPI00896413;IPI00922043;IPI00791097	IPI00944960	13;13;13;13;13;7;2;2	13;13;13;13;13;7;2;2	13;13;13;13;13;7;2;2	Inter-alpha (Globulin) inhibitor H4 (Plasma Kallikrein-sensitive glycoprotein);ITIH4 protein;35 kDa inter-alpha-trypsin inhibitor heavy chain H4;70 kDa inter-alpha-trypsin inhibitor heavy chain H4;Inter-alpha-trypsin inhibitor family heavy chain-related protein;Inter-alpha-trypsin inhibitor heavy chain H4;Plasma kallikrein sensitive glycoprotein 120;cDNA FLJ60068, highly similar to Inter-alpha-tr…	ITIH4;IHRP;ITIHL1;PK120;PRO1851;DKFZp686G21125	ITIH4 protein;Isoform 1 of Inter-alpha-trypsin inhibitor heavy chain H4;Isoform 2 of Inter-alpha-trypsin inhibitor heavy chain H4;inter-alpha (globulin) inhibitor H4 isoform 2 precursor;cDNA FLJ51742, highly similar to Inter-alpha-trypsin inhibitor heavy c	B2RMS9;B7ZKJ8;Q14624-1;Q14624;B7Z545;B7Z551;Q68DH2;Q14624-2;B7Z544;B7Z8Q7	8	13	13	13	12	11	12	13	12	11	12	13	12	11	12	13	20.1	20.1	20.1	103.88	935	13	12	12	15	2.01e-100	11310000	1891600	2541100	1354000	5523500	1956900	3300700	929140	9610900	4
585	204;205;582;815;1647			IPI00945366;IPI00387115;IPI00387118;IPI00827826;IPI00385252	IPI00945366;IPI00387115;IPI00387118	IPI00945366	5;3;3;2;2	1;1;1;1;1	0;0;0;0;0	Myosin-reactive immunoglobulin light chain variable region;Ig kappa chain V-III region SIE;Ig kappa chain V-III region WOL		Myosin-reactive immunoglobulin light chain variable region (Fragment);Ig kappa chain V-III region SIE;Ig kappa chain V-III region WOL	Q9UL78;P01620;P01623	5	5	1	0	3	4	5	4	1	1	1	1	0	0	0	0	59.6	16.5	0	11.646	109	3	2	2	2	5.07e-132	33230000	1048700	1018500	27279000	3883800	514240	548710	30752000	4275400	4
332	357;421;751;1089;1643;1833;2298;3035			IPI00947127;IPI00217966;IPI00908791;IPI00607708;IPI00939286;IPI00952964;IPI00910754;IPI00795075	IPI00947127;IPI00217966;IPI00908791;IPI00607708;IPI00939286;IPI00952964;IPI00910754;IPI00795075	IPI00947127	8;8;7;6;6;5;5;5	8;8;7;6;6;5;5;5	8;8;7;6;6;5;5;5	L-lactate dehydrogenase;Cell proliferation-inducing gene 19 protein;LDH muscle subunit;L-lactate dehydrogenase A chain;Renal carcinoma antigen NY-REN-59;cDNA FLJ52549, highly similar to L-lactate dehydrogenase A chain (EC 1.1.1.27)	LDHA;PIG19;hCG_96677	lactate dehydrogenase A isoform 3;Isoform 1 of L-lactate dehydrogenase A chain;L-lactate dehydrogenase;Isoform 2 of L-lactate dehydrogenase A chain;Putative uncharacterized protein LDHA;lactate dehydrogenase A isoform 4;lactate dehydrogenase A isoform 2;la	B7Z5E3;P00338-1;P00338;B4DJI1;P00338-2;C9J4M5;A8MXQ4;B4DKQ2	8	8	8	8	8	8	8	8	8	8	8	8	8	8	8	8	27.4	27.4	27.4	39.837	361	10	10	10	10	4.47e-82	9152000	1271300	1295000	4382200	2203600	1219900	1328500	4749800	3838900	4
584	167;168;319;756;2584;3129			IPI00947413;IPI00954263;IPI00943932;IPI00942023;IPI00946328;IPI00004657;IPI00479242;IPI00472676;IPI00026602;IPI00746105;IPI00953909;IPI00954173;IPI00953932;IPI00946178;IPI00952714;IPI00953945;IPI00953916;IPI00954238;IPI00954138;IPI00954285;IPI00953919;IPI00954286;IPI00954127;IPI00954059;IPI00930478;IPI00954232;IPI00953953;IPI00954020;IPI00930665;IPI00953901;IPI00954218;IPI00954111;IPI00954074;IPI…	IPI00947413;IPI00954263;IPI00943932;IPI00942023;IPI00946328;IPI00004657;IPI00479242;IPI00472676;IPI00026602;IPI00746105;IPI00953909;IPI00954173;IPI00953932;IPI00946178;IPI00952714;IPI00953945;IPI00953916;IPI00954238;IPI00954138;IPI00954285;IPI00953919;IPI00954286;IPI00954127;IPI00954059;IPI00930478;IPI00954232;IPI00953953;IPI00954020;IPI00930665;IPI00953901;IPI00954218;IPI00954111;IPI00954074;IPI…	IPI00947413	6;6;6;5;5;5;5;5;5;5;5;5;5;5;5;5;5;5;5;5;5;5;5;5;5;5;5;5;5;5;5;5;4;4;4;4;4;3;3;3;3;3;3;3;3;3;3;3;3;3;3;3;3;3;3;3;3;3;3;3;3;3;3;3;3;3;3;3;3;3;3;3;3;3;3;3;3;3;3;3;3;3;3;3;3;3;3;3;3;3;3;3;3;3;3;3;3;3;2;2;2;2;2;2;2;2;2;2;2;2;2;2;2;2;2;2;2;2;2;2;2;2;2	1;1;1;1;1;1;1;1;1;1;1;1;1;1;1;1;1;1;1;1;1;1;1;1;1;1;1;1;1;1;1;1;1;1;1;1;1;1;1;1;1;1;1;1;1;1;1;1;1;1;1;1;1;1;1;1;1;1;1;1;1;1;1;1;1;1;1;1;1;1;1;1;1;1;1;1;1;1;1;1;1;1;1;1;1;1;1;1;1;1;1;1;1;1;1;1;1;1;1;1;1;1;1;1;1;1;1;1;1;1;1;1;1;1;1;1;1;1;1;1;1;1;1	0;0;0;0;0;0;0;0;0;0;0;0;0;0;0;0;0;0;0;0;0;0;0;0;0;0;0;0;0;0;0;0;0;0;0;0;0;0;0;0;0;0;0;0;0;0;0;0;0;0;0;0;0;0;0;0;0;0;0;0;0;0;0;0;0;0;0;0;0;0;0;0;0;0;0;0;0;0;0;0;0;0;0;0;0;0;0;0;0;0;0;0;0;0;0;0;0;0;0;0;0;0;0;0;0;0;0;0;0;0;0;0;0;0;0;0;0;0;0;0;0;0;0	MHC class I antigen;HLA class I histocompatibility antigen, B-7 alpha chain;MHC class I antigen B*7;cDNA FLJ77663, highly similar to Homo sapiens major histocompatibility complex, class I, B (HLA-B),mRNA;MRNA for the histocompatibility antigen (HLA-B).;HLA protein;Leucocyte antigen B;HLA class I histocompatibility antigen, B-8 alpha chain;MHC class I antigen B*8;MHC class 1 antigen;HLA-B*4012 alp…	HLA-B;HLA-A;HLAB;HLA;HLA-B*4012;MICA;XXbac-BCX25O20.1-001;HLA-B*;HLAC;HLA-C;XXbac-BCX25O20.1-003;XXbac-BPG248L24.5-003;HLA-B*4202;HLA-B*07ML;HLA-B*40	MHC class I antigen;MHC class I antigen (Fragment);MHC class I antigen (Fragment);48 kDa protein;MHC class I antigen (Fragment);HLA class I histocompatibility antigen, B-7 alpha chain;HLA class I histocompatibility antigen, B-8 alpha chain;HLA class I hist	Q6KEQ1;Q860B6;Q6AW24;Q2HPN1;P01889;A4FRG0;A5LIC1;A7L6C1;A8K861;B3VN05;B6VAW4;B9VWB1;B9WPQ8;C1KES8;C6H0P5;C6K6H4;C6K6H5;C6K6H9;C6K6I2;C6K6I3;C6K6J0;Q1ZZH2;Q29637;Q29843;Q29923;Q5F311;Q5QR29;Q5QR30;Q5QR31;Q5QR33;Q5QR34;Q5QR36;Q5QR42;Q5QR46;Q5QR47;Q5QR48;Q5QR57;Q5QR58;Q5QR59;Q5QR60;Q5QR62;Q5QR69;Q5QR73;Q5QR76;Q5QR83;Q5QR84;Q5QR85;Q5QR86;Q5QR87;Q5QR88;Q6ZXT6;Q709M5;Q70HJ6;Q710M7;Q710M8;Q7JGR9;Q7JGS0;…	123	6	1	0	5	5	6	4	1	1	1	1	0	0	0	0	22.4	3.9	0	40.493	362	2	1	2	2	8.06e-66	3097800	2064600	45475	667260	320430	3061500	15411	526840	132810	4
511	649;714;718;1521;1616;1766;2045;2243;2244;2874			IPI00952875;IPI00791613;IPI00646909;IPI00792478	IPI00952875;IPI00791613;IPI00646909;IPI00792478	IPI00952875	10;10;10;10	2;2;2;2	2;2;2;2	Putative uncharacterized protein DKFZp686L04275;Putative uncharacterized protein TUBA8;Alpha-tubulin 8;Tubulin alpha chain-like 2;Tubulin alpha-8 chain;cDNA FLJ32385 fis, clone SKMUS1000110, highly similar to Tubulin alpha-8 chain;Tubulin, alpha 8, isoform CRA_b	DKFZp686L04275;TUBA8;TUBAL2;hCG_21536	Putative uncharacterized protein DKFZp686L04275 (Fragment);Putative uncharacterized protein TUBA8;Tubulin alpha-8 chain;Tubulin, alpha 8, isoform CRA_b	Q7Z3M3;C9J2C0;Q9NY65;B3KPW9	4	10	2	2	10	10	10	10	2	2	2	2	2	2	2	2	24	3.3	3.3	53.969	479	2	2	2	2	2.62e-116	1836500	481200	518700	523380	313210	581680	745890	525580	431400	4
586	247			IPI00953357;IPI00953235	IPI00953357;IPI00953235	IPI00953357	1;1	1;1	1;1	Putative uncharacterized protein GP6	GP6	glycoprotein VI (platelet) isoform 2;Putative uncharacterized protein GP6	C9JXL6	2	1	1	1	1	1	1	0	1	1	1	0	1	1	1	0	4.7	4.7	4.7	36.866	339	1	1	1		0.0063823	562730	306870	84373	171480	0	509640	56124	87237	0	3
274	104;705;1683;1969;2680;3189	14	183	IPI00954154;IPI00936352;IPI00032137	IPI00954154;IPI00936352;IPI00032137	IPI00954154	6;6;6	1;1;1	1;1;1	cDNA FLJ58651, highly similar to Alpha-actinin-3;cDNA, FLJ94117, highly similar to Homo sapiens actinin, alpha 3 (ACTN3), mRNA;ACTN3 protein;Alpha-actinin skeletal muscle isoform 3;Alpha-actinin-3;F-actin cross-linking protein	ACTN3	cDNA FLJ58651, highly similar to Alpha-actinin-3;actinin, alpha 3;Alpha-actinin-3	B4DZQ2;B2R8Y4;Q4JCP9;Q4VAM3;Q08043	3	6	1	1	5	6	5	5	0	1	0	0	0	1	0	0	6.8	1.3	1.3	107.65	944		1			4.06e-43	279990	0	279990	0	0	0	366100	0	0	1
587	167;318;479;749;2583;2824;3083			IPI00954460;IPI00743503;IPI00472013;IPI00936210;IPI00785070;IPI00743359;IPI00745699;IPI00944472	IPI00954460;IPI00743503;IPI00472013;IPI00936210;IPI00785070;IPI00743359;IPI00745699;IPI00944472	IPI00954460	7;5;5;5;4;4;4;4	1;1;1;1;1;1;1;1	0;0;0;0;0;0;0;0	MHC class I antigen;Aw-34;HLA class I histocompatibility antigen, A-10 alpha chain;HLA class I histocompatibility antigen, A-34 alpha chain;MHC class I antigen A*34;Aw-19;Aw-33;HLA class I histocompatibility antigen, A-33 alpha chain;MHC class I antigen A*33;HLA class I histocompatibility antigen, A-25 alpha chain;MHC class I antigen A*25;Aw-43;HLA class I histocompatibility antigen, A-43 alpha c…	HLA-A;HLAA;DAQB-90C11.16-002;DAQB-90C11.16-001;HLA-A*0201V3;HLA-A*03;DAQB-90C11.16-003	MHC class I antigen (Fragment);HLA class I histocompatibility antigen, A-34 alpha chain;HLA class I histocompatibility antigen, A-33 alpha chain;MHC class I antigen (Fragment);Major histocompatibility complex, class I, A;HLA class I histocompatibility anti	Q1W4D6;P30453;B1PKZ1;P16190;Q19K87;P18462;P30456;P30457;C5IWY6;Q5SPM3;Q9MY52;P30450;A0EVK0;A0FKC6;A0T4C1;A2BCQ5;A2Q116;A4FRB7;A5A8M7;A5JSF6;A5YVG2;A8D714;B0JE61;B6VAX0;B7VGE8;C1KBJ5;C5IWY9;C6H0P1;C9E1F0;O02860;O19559;O19620;O78096;P79500;P79556;Q06FC4;Q0PQ79;Q0VJ91;Q0VZ44;Q0ZB68;Q19BJ8;Q1ELT0;Q27I56;Q29739;Q2MGW5;Q2Z194;Q38MU7;Q45NE2;Q45YJ7;Q4QZC0;Q4ZG94;Q4ZJJ1;Q53ZN6;Q5NTA2;Q5SPM2;Q6E5A2;Q6I6G7;…	8	7	1	0	5	6	5	6	0	0	1	0	0	0	0	0	33.3	4.8	0	31.597	273			1		4.96e-83	467260	0	0	467260	0	0	0	467260	0	1
588	167;318;479;749;1084;2583;2824;3118			IPI00954528;IPI00954538;IPI00954584;IPI00472882;IPI00954570;IPI00954585;IPI00954489	IPI00954528;IPI00954538;IPI00954584;IPI00472882;IPI00954570;IPI00954585;IPI00954489	IPI00954528	8;8;8;7;7;7;4	1;1;1;1;1;1;1	0;0;0;0;0;0;0	MHC class I antigen;Aw-68;HLA class I histocompatibility antigen, A-28 alpha chain;HLA class I histocompatibility antigen, A-68 alpha chain;MHC class I antigen A*68;Leucocyte antigen A alpha chain;HLA-A protein	HLA-A;HLAA	MHC class I antigen (Fragment);MHC class I antigen (Fragment);MHC class I antigen (Fragment);HLA class I histocompatibility antigen, A-68 alpha chain;MHC class I antigen (Fragment);Leucocyte antigen A alpha chain (Fragment);HLA-A protein (Fragment)	Q5G274;Q6IV49;Q704T5;P01891;B1PKZ2;Q0PMJ8;Q9UQT7;Q29946	7	8	1	0	5	7	4	7	0	0	0	1	0	0	0	0	30.7	4	0	37.215	329				1	3.76e-84	326760	0	0	0	326760	0	0	0	522540	1
589	457			REV__IPI00005981;REV__IPI00797169;REV__IPI00947530	REV__IPI00005981;REV__IPI00797169;REV__IPI00947530	REV__IPI00005981	1;1;1	1;1;1	1;1;1	Neuronal protein 22;Neuronal protein NP25;Transgelin-3;Putative uncharacterized protein TAGLN3	NP25;TAGLN3	>IPI:IPI00005981.6|SWISS-PROT:Q9UI15|TREMBL:Q7Z517|ENSEMBL:ENSP00000273368;ENSP00000377494;ENSP00000391160;ENSP00000419105|REFSEQ:NP_001008273;NP_001008274;NP_037391|H-INV:HIT000076702|VEGA:OTTHUMP00000172210;OTTHUMP00000172212 Tax_Id=9606 Gene_Symbol=TAGL	Q9UI15;Q7Z517;C9J5W6	3	1	1	1	1	1	1	1	1	1	1	1	1	1	1	1	5.4	5.4	5.4	24.893	221	1	1	1	1	0.041917	70552	0	30507	21666	18378	0	50256	17267	23423	3
592	2641			REV__IPI00640703;REV__IPI00747670	REV__IPI00640703;REV__IPI00747670	REV__IPI00640703	1;1	1;1	1;1	Exportin-5;Ran-binding protein 21;cDNA FLJ78655, highly similar to Homo sapiens exportin 5 (XPO5), mRNA;cDNA FLJ32057 fis, clone NTONG2001642, highly similar to Exportin-5;Putative uncharacterized protein XPO5	KIAA1291;RANBP21;XPO5	>IPI:IPI00640703.3|SWISS-PROT:Q9HAV4-1|TREMBL:A8K5Y7;B3KPQ5|ENSEMBL:ENSP00000265351;ENSP00000381779|REFSEQ:NP_065801|H-INV:HIT000001007|VEGA:OTTHUMP00000016472 Tax_Id=9606 Gene_Symbol=XPO5 Isoform 1 of Exportin-5;>IPI:IPI00747670.2|SWISS-PROT:Q9HAV4-2|TREM	Q9HAV4-1;Q9HAV4;A8K5Y7;B3KPQ5;Q9HAV4-2;C9J4N8	2	1	1	1	1	1	1	1	1	1	1	1	1	1	1	1	0.6	0.6	0.6	136.31	1204	1	1	1	1	0.049667	5685400	928780	771090	2794900	1190600	941250	814780	3172700	1901800	4
591	2147			REV__IPI00743154;REV__IPI00952966;REV__IPI00783797;REV__IPI00940945;REV__IPI00477968	REV__IPI00743154;REV__IPI00952966;REV__IPI00783797;REV__IPI00940945;REV__IPI00477968	REV__IPI00743154	1;1;1;1;1	1;1;1;1;1	1;1;1;1;1	Cytosolic phospholipase A2 zeta;Phospholipase A2 group IVF;Phospholipase A2, group IVF;cDNA FLJ16044 fis, clone CTONG1000175, highly similar to Cytosolic phospholipase A2 zeta (EC 3.1.1.4);cDNA FLJ57347, highly similar to Cytosolic phospholipase A2 zeta (EC 3.1.1.4);Putative uncharacterized protein PLA2G4F	PLA2G4F	>IPI:IPI00743154.1|SWISS-PROT:Q68DD2-2|TREMBL:A5PKZ7;A6H8K5;B3KV15;B4E2P5|ENSEMBL:ENSP00000400843|H-INV:HIT000042496 Tax_Id=9606 Gene_Symbol=PLA2G4F cDNA FLJ16044 fis, clone CTONG1000175, highly similar to Cytosolic phospholipase A2 zeta;>IPI:IPI00952966.1	Q68DD2-2;Q68DD2;A5PKZ7;A6H8K5;B3KV15;B4E2P5;C9J281;Q68DD2-3;Q68DD2-1;C9J2U1	5	1	1	1	0	0	1	0	0	0	1	0	0	0	1	0	1.4	1.4	1.4	96.961	865			1		0.027889	851470	0	0	851470	0	0	0	851470	0	1
0	182;485;764;1667;2405;2488;2702			CON__ENSEMBL:ENSBTAP00000038253	CON__ENSEMBL:ENSBTAP00000038253	CON__ENSEMBL:ENSBTAP00000038253	7	1	0			>ENSEMBL:ENSBTAP00000038253 (Bos taurus) 63 kDa protein		1	7	1	0	7	7	7	7	1	1	1	1	0	0	0	0	10.7	1.5	0	63.165	606	1	1	1	1	9e-79	488310	17436	74817	203340	192720	7635.3	35415	214300	373100	4
1	1242;1570;1782;2820	0	94	CON__P00761	CON__P00761	CON__P00761	4	4	4			>P00761 SWISS-PROT:P00761|TRYP_PIG Trypsin - Sus scrofa (Pig).	P00761	1	4	4	4	4	4	4	4	4	4	4	4	4	4	4	4	25.1	25.1	25.1	24.409	231	7	7	7	7	1.48e-120	314890000	69167000	71863000	88161000	85695000	78772000	87520000	86994000	149550000	4
2	1750;1914;2796;2828;2872	1	33	CON__P01966	CON__P01966	CON__P01966	5	1	1			>P01966 SWISS-PROT:P01966 (Bos taurus) Hemoglobin subunit alpha	P01966	1	5	1	1	4	4	3	5	0	0	0	1	0	0	0	1	34.5	10.6	10.6	15.184	142				1	5.55e-46	11967000	0	0	0	11967000	0	0	0	19137000	1
7	160;224;225;423;1338;2317;2337;2862	5	301	CON__P15636	CON__P15636	CON__P15636	8	8	8			>P15636 SWISS-PROT:P15636 Protease I precursor Lysyl endopeptidase Achromobacter lyticus.	P15636	1	8	8	8	7	7	7	8	7	7	7	8	7	7	7	8	20.8	20.8	20.8	68.124	653	11	10	8	11	3.48e-109	90841000	19023000	26902000	19913000	25004000	21875000	40661000	18309000	37238000	4
12	44;254;674;1982;2012;2186;2792;2794;3190;3258			CON__Q28107	CON__Q28107	CON__Q28107	10	1	1			>Q28107 SWISS-PROT:Q28107 (Bos taurus) Coagulation factor V precursor	Q28107	1	10	1	1	10	9	8	7	1	1	1	1	1	1	1	1	5	0.6	0.6	248.98	2211	1	1	1	1	8.1e-75	2178900	1068000	592860	339300	178720	1574300	796730	174360	146870	4
13	630;686;1059;1060;1088;1380;1437;1712;2108;2692;3103			CON__Q2UVX4	CON__Q2UVX4	CON__Q2UVX4	11	1	1			>Q2UVX4 SWISS-PROT:Q2UVX4 (Bos taurus) Complement C3 precursor	Q2UVX4	1	11	1	1	10	10	9	10	1	0	0	0	1	0	0	0	5.6	1.3	1.3	187.37	1662	1				1.36e-42	196210	196210	0	0	0	237340	0	0	0	1
15	709;1529			CON__Q6IME9	CON__Q6IME9	CON__Q6IME9	2	1	1	Cytokeratin-72;Keratin, type II cytoskeletal 72;Keratin-72;Type II inner root sheath-specific keratin-K6irs2;Type-II keratin Kb35	Kb35;Krt72	>Q6IME9 TREMBL:Q6IME9 Tax_Id=10090 Gene_Symbol=Krt72 Type-II keratin Kb35	Q6IME9	1	2	1	1	1	1	2	1	0	0	1	0	0	0	1	0	4.6	3.3	3.3	56.75	520			2		0.0034802	12931000	0	0	12931000	0	0	0	12931000	0	1
16	913;1627;2672;2847;2934			IPI00000075	IPI00000075	IPI00000075	5	5	5	Latency-associated peptide;Transforming growth factor beta-1;Transforming growth factor beta 1;Transforming growth factor-beta 1	TGFB;TGFB1	Transforming growth factor beta-1	P01137;B2C8Z3;Q49IK8;Q49IL8;Q5PY19;Q671U8;Q671V1;Q7Z487;Q7Z488;Q86YU2	1	5	5	5	5	5	4	5	5	5	4	5	5	5	4	5	15.1	15.1	15.1	44.341	390	6	6	5	6	8.19e-42	5866800	2535100	1591800	1089100	650830	3378900	2016300	1008900	873600	4
23	1906			IPI00001639	IPI00001639	IPI00001639	1	1	1	Importin subunit beta-1;Importin-90;Karyopherin subunit beta-1;Nuclear factor p97;Pore targeting complex 97 kDa subunit;cDNA, FLJ95650, highly similar to Homo sapiens karyopherin (importin) beta 1 (KPNB1), mRNA;cDNA FLJ50715, highly similar to Importin beta-1 subunit;cDNA, FLJ79320, highly similar to Importin beta-1 subunit	KPNB1;NTF97	Importin subunit beta-1	Q14974;B2RBR9;B7Z752;B7ZAV6;Q53XN2	1	1	1	1	1	1	1	1	1	1	1	1	1	1	1	1	1	1	1	97.169	876	1	1	1	1	0.00093553	209690	49760	36498	85575	37858	58529	42950	93568	58984	4
25	711;735;1013;1253;2190;3110;3128			IPI00001952	IPI00001952	IPI00001952	7	7	7	Endonuclease domain-containing 1 protein;cDNA FLJ77325	ENDOD1;KIAA0830	Endonuclease domain-containing 1 protein	O94919;A8K6K8	1	7	7	7	7	7	7	7	7	7	7	7	7	7	7	7	25.8	25.8	25.8	55.016	500	8	7	8	7	2.73e-45	10169000	3748400	2955900	1968600	1496400	6092900	4128000	1272200	1267700	4
31	383;1130;1493;1525;2587;2816;3227	6;10	191;356	IPI00003269	IPI00003269	IPI00003269	7	1	1	Beta-actin-like protein 2;Kappa-actin	ACTBL2	Beta-actin-like protein 2	Q562R1;B2RPJ1	1	7	1	1	7	7	6	6	1	1	0	0	1	1	0	0	22.1	4.8	4.8	42.003	376	1	1			6.08e-86	221640000	124890000	96750000	0	0	163160000	114410000	0	0	2
33	591;1203;1238;1355;2007;2085;2949			IPI00003362	IPI00003362	IPI00003362	7	6	6	78 kDa glucose-regulated protein;Endoplasmic reticulum lumenal Ca(2+)-binding protein grp78;Heat shock 70 kDa protein 5;Immunoglobulin heavy chain-binding protein;cDNA FLJ60062, highly similar to 78 kDa glucose-regulated protein;HSPA5 protein	GRP78;HSPA5	HSPA5 protein	P11021;B4DEF7;Q2KHP4	1	7	6	6	7	6	5	6	6	5	4	5	6	5	4	5	13.9	11.5	11.5	72.421	655	6	5	4	5	2.96e-69	8439600	2399200	1718600	2655300	1666500	2358000	2579000	2969500	2563100	4
35	344			IPI00003470	IPI00003470	IPI00003470	1	1	1	Ig kappa chain V-I region Wes		Ig kappa chain V-I region Wes	P01611	1	1	1	1	1	1	1	1	1	1	1	1	1	1	1	1	16.7	16.7	16.7	11.608	108	1	1	1	1	6.43e-35	2331700	96707	89490	1803500	342020	17368	17373	2468500	81204	4
40	1716			IPI00004358	IPI00004358	IPI00004358	1	1	1	Glycogen phosphorylase, brain form;Phosphorylase	PYGB	Glycogen phosphorylase, brain form	P11216;B4DSD8;Q59GM9	1	1	1	1	1	1	1	1	1	1	1	1	1	1	1	1	1.9	1.9	1.9	96.695	843	1	1	1	1	0.00022785	139540	26164	25888	53813	33675	30967	31345	58158	52692	4
45	746;1936;2241			IPI00005087	IPI00005087	IPI00005087	3	3	3	Tropomodulin-3;Ubiquitous tropomodulin;Putative uncharacterized protein DKFZp686E1899	TMOD3;DKFZp686E1899	Tropomodulin-3	Q9NYL9;Q5HYL6	1	3	3	3	3	3	2	2	3	3	2	2	3	3	2	2	11.9	11.9	11.9	39.594	352	3	3	2	2	1.82e-16	1754100	783570	578200	227040	165280	1093700	780340	132040	189100	4
52	401;1845;2232;2264;2347;2920			IPI00005809	IPI00005809	IPI00005809	6	6	6	Cavin-2;Phosphatidylserine-binding protein;PS-p68;Serum deprivation-response protein;cDNA FLJ78516	SDPR	Serum deprivation-response protein	O95810;A8K2W3	1	6	6	6	6	6	5	6	6	6	5	6	6	6	5	6	20	20	20	47.173	425	9	8	6	8	5.33e-165	41590000	13350000	10005000	12159000	6075400	16222000	11918000	14160000	8806100	4
61	131			IPI00007047	IPI00007047	IPI00007047	1	1	1	Calgranulin-A;Calprotectin L1L subunit;Cystic fibrosis antigen;Leukocyte L1 complex light chain;Migration inhibitory factor-related protein 8;Protein S100-A8;S100 calcium-binding protein A8;Urinary stone protein band A	CAGA;CFAG;MRP8;S100A8	Protein S100-A8	P05109	1	1	1	1	1	1	1	1	1	1	1	1	1	1	1	1	11.8	11.8	11.8	10.834	93	1	1	1	1	0.022899	1313700	444810	254890	412610	201350	696720	283770	351300	274150	4
68	861;1061			IPI00007676	IPI00007676	IPI00007676	2	2	2	17-beta-hydroxysteroid dehydrogenase 12;3-ketoacyl-CoA reductase;Estradiol 17-beta-dehydrogenase 12;cDNA FLJ90530 fis, clone NT2RP4002187, highly similar to Homo sapiens hydroxysteroid (17-beta) dehydrogenase 12 (HSD17B12), mRNA;cDNA FLJ61181, highly similar to Homo sapiens hydroxysteroid (17-beta) dehydrogenase 12 (HSD17B12), mRNA	HSD17B12	Estradiol 17-beta-dehydrogenase 12	Q53GQ0;B3KQJ0;B4DWS6	1	2	2	2	2	2	2	2	2	2	2	2	2	2	2	2	12.8	12.8	12.8	34.324	312	2	2	2	2	1.87e-05	899640	475980	120770	203310	99588	883580	69119	89996	53533	4
70	119;120			IPI00007906	IPI00007906	IPI00007906	2	2	2	Myosin-reactive immunoglobulin heavy chain variable region		Myosin-reactive immunoglobulin heavy chain variable region (Fragment)	Q9UL96	1	2	2	2	2	2	2	2	2	2	2	2	2	2	2	2	12.4	12.4	12.4	13.695	121	2	2	3	3	4.69e-17	1418400	95338	32195	1181300	109580	62375	22382	1332900	96348	4
73	370;1223;3115			IPI00008578	IPI00008578	IPI00008578	3	3	3	CD226 antigen;DNAX accessory molecule 1	CD226;DNAM1	CD226 antigen	Q15762	1	3	3	3	3	3	2	3	3	3	2	3	3	3	2	3	14.6	14.6	14.6	38.584	336	3	3	2	3	1.21e-23	3955800	1696300	1391800	525280	342510	2384000	2026400	297610	236700	4
76	693			IPI00009309	IPI00009309	IPI00009309	1	1	1	C-C motif chemokine 5;EoCP;Eosinophil chemotactic cytokine;RANTES(3-68);RANTES(4-68);SIS-delta;Small-inducible cytokine A5;T cell-specific protein P228;T-cell-specific protein RANTES;cDNA, FLJ92501, highly similar to Homo sapiens chemokine (C-C motif) ligand 5 (CCL5), mRNA;Chemokine (C-C motif) ligand 5;Chemokine ligand 5;RANTES chemokine	CCL5;D17S136E;SCYA5;hCG_32592	C-C motif chemokine 5	P13501;B2R5J8;D0EI67;Q9UBL2	1	1	1	1	1	1	1	1	1	1	1	1	1	1	1	1	8.8	8.8	8.8	9.9896	91	1	1	1	1	0.056988	1354500	571460	547450	235610	0	729180	768400	145100	0	3
83	2185			IPI00009950	IPI00009950	IPI00009950	1	1	1	Glycoprotein GP36b;Lectin mannose-binding 2;Vesicular integral-membrane protein VIP36;cDNA FLJ75774, highly similar to Homo sapiens lectin, mannose-binding 2 (LMAN2), mRNA;cDNA FLJ52285, highly similar to Vesicular integral-membrane protein VIP36	C5orf8;LMAN2	Vesicular integral-membrane protein VIP36	Q12907;A8K7T4;B4DWN1	1	1	1	1	1	1	1	1	1	1	1	1	1	1	1	1	7.6	7.6	7.6	40.228	356	1	1	1	1	0.0024819	505510	158040	121370	114520	111570	208550	162710	106170	165400	4
87	298			IPI00010414	IPI00010414	IPI00010414	1	1	1	C-terminal LIM domain protein 1;Elfin;LIM domain protein CLP-36;PDZ and LIM domain protein 1	CLIM1;CLP36;PDLIM1	PDZ and LIM domain protein 1	O00151	1	1	1	1	0	1	1	0	0	1	1	0	0	1	1	0	3	3	3	36.071	329		1	1		7.56e-06	308920	0	101680	207240	0	0	0	207240	0	1
111	739;750;997;1211;1222;1265;1304;2759;3040;3055;3080			IPI00013744	IPI00013744	IPI00013744	11	11	11	CD49 antigen-like family member B;Collagen receptor;Integrin alpha-2;Platelet membrane glycoprotein Ia;VLA-2 subunit alpha;GPIa protein;Integrin alpha 2;Integrin alpha-2 subunit	CD49B;ITGA2;GPIa	Integrin alpha-2	P17301;Q16183;Q71V33;Q9NNZ2	1	11	11	11	11	10	10	9	11	10	10	9	11	10	10	9	11.5	11.5	11.5	129.29	1181	12	10	10	9	1.07e-63	7042700	3839600	1531700	1074800	596630	5405800	2344300	485180	440810	4
118	397			IPI00014377	IPI00014377	IPI00014377	1	1	1	Ras-related protein Rab-32;cDNA, FLJ92490, highly similar to Homo sapiens RAB32, member RAS oncogene family (RAB32), mRNA	RAB32	Ras-related protein Rab-32	Q13637;B2R5I8	1	1	1	1	1	1	0	1	1	1	0	1	1	1	0	1	4.4	4.4	4.4	24.997	225	2	1		1	4.79e-10	415310	169960	169170	0	76175	213290	238040	0	97280	3
120	2133;2345			IPI00014572	IPI00014572	IPI00014572	2	2	2	Basement-membrane protein 40;Osteonectin;Secreted protein acidic and rich in cysteine;SPARC;cDNA, FLJ96669, highly similar to Homo sapiens secreted protein, acidic, cysteine-rich (osteonectin)(SPARC), mRNA;cDNA FLJ55667, highly similar to Secreted protein acidic and rich in cysteine;Cysteine-rich protein	ON;SPARC	SPARC	P09486;B2RDL6;B4DRV4;Q6QE20	1	2	2	2	2	2	2	2	2	2	2	2	2	2	2	2	15.8	15.8	15.8	34.632	303	2	2	2	2	6.16e-11	3597500	665130	770670	1396700	765070	1246100	1251700	1008100	926390	4
123	25			IPI00015801	IPI00015801	IPI00015801	1	1	1	Chemokine-like factor superfamily member 6;CKLF-like MARVEL transmembrane domain-containing protein 6	CKLFSF6;CMTM6	CKLF-like MARVEL transmembrane domain-containing protein 6	Q9NX76;Q6IAC4	1	1	1	1	1	1	1	1	1	1	1	1	1	1	1	1	5.5	5.5	5.5	20.419	183	1	1	1	1	5.55e-05	870280	377270	252670	132840	107500	549210	357020	80751	104500	4
124	2305			IPI00015869	IPI00015869	IPI00015869	1	1	1	Trichohyalin;TCHH protein	TCHH;THH;THL;TRHY	Trichohyalin	Q07283;A2RRS3;Q16043;Q5D861	1	1	1	1	1	1	1	1	1	1	1	1	1	1	1	1	0.7	0.7	0.7	253.92	1943	2	2	2	2	0.055479	8576100	3844800	1458500	1989400	1283500	5657700	1488300	1552600	1901000	4
125	2842			IPI00015954	IPI00015954	IPI00015954	1	1	1	COPII-associated small GTPase;GTP-binding protein SAR1a;cDNA, FLJ92825, highly similar to Homo sapiens SAR1a gene homolog 1 (S. cerevisiae) (SARA1), mRNA;cDNA FLJ58922, highly similar to GTP-binding protein SAR1a;SAR1 gene homolog A (S. cerevisiae);SAR1 gene homolog A (S. cerevisiae), isoform CRA_a;Small GTP-binding protein;SARA1 protein;GTP binding protein;GTP-binding protein Sara;Masra2	SAR1;SAR1A;SARA;SARA1;hCG_1787550;RP11-367H5.4-001	GTP-binding protein SAR1a	Q9NR31;B2R679;B4DQ19;Q5SQT9;Q6FID4;Q8NG23	1	1	1	1	1	1	1	1	1	1	1	1	1	1	1	1	11.6	11.6	11.6	22.367	198	1	1	1	1	6.35e-13	520450	65851	71818	255730	127050	60427	75256	286190	210590	4
126	61;261			IPI00015972	IPI00015972	IPI00015972	2	2	2	Cytochrome c oxidase polypeptide VIc;Cytochrome c oxidase subunit 6C	COX6C	Cytochrome c oxidase subunit 6C	P09669	1	2	2	2	2	2	2	2	2	2	2	2	2	2	2	2	20	20	20	8.7813	75	2	2	2	2	0.00031023	1299300	564770	443250	203930	87366	718260	731380	92190	64536	4
130	47;48;1655;2029;2793			IPI00016513	IPI00016513	IPI00016513	5	4	4	Ras-related protein Rab-10;Putative uncharacterized protein RAB10;GTP-binding protein RAB10	RAB10	Ras-related protein Rab-10	P61026;Q53SX4;Q53T70;Q9UL28	1	5	4	4	5	5	5	5	4	4	4	4	4	4	4	4	21	15.5	15.5	22.541	200	6	5	6	5	1.24e-37	7328900	2853800	1906500	1564500	1004100	3897400	2475900	1244900	1496900	4
136	1204;1635;1941			IPI00017510	IPI00017510	IPI00017510	3	3	3	Cytochrome c oxidase polypeptide II;Cytochrome c oxidase subunit 2	COII;COXII;MTCO2;MT-CO2;COX2;CO2	Cytochrome c oxidase subunit 2	P00403;A0S0W7;A0S2P1;A0S3T1;A0SA07;A1Z455;A1Z4V2;A4ZKZ0;A6YW54;A6YWD1;A6YXV0;A6Z3M5;A6Z6E8;A6ZEU4;A6ZF47;A6ZFK3;A6ZHA9;A7LDC6;A7LF11;A7LFA2;B0Z6W4;B1W855;B2CB37;B2WRY8;B2XHF9;B2XHT9;B2XIR3;B2XL43;B2XP28;B2XPS3;B2YKU2;B3DE06;B3GUF3;B5M7M0;C5H6K5;C5H6K6;C5H6K7;C5H6L3;C5H6M3;C5H6M4;C5H6M5;C5H6M7;C5H6M8;C8XWJ6;C8Y3G4;C8Y3Q5;C8YBL1;C9D661;Q06TE6;Q09U41;Q0Z7D8;Q0Z7F1;Q0Z7J0;Q0Z7K3;Q0Z7S0;Q14XI3;Q14XT3;…	1	3	3	3	3	3	3	3	3	3	3	3	3	3	3	3	16.3	16.3	16.3	25.565	227	3	3	3	3	3.43e-06	2617500	1088700	866850	456990	204950	1443700	1169200	402190	220010	4
138	728;1545;1566;2857;2898			IPI00017672	IPI00017672	IPI00017672	5	5	5	Inosine phosphorylase;Purine nucleoside phosphorylase;cDNA FLJ25678 fis, clone TST04067, highly similar to PURINE NUCLEOSIDE PHOSPHORYLASE (EC 2.4.2.1);PRO1837	NP;PNP	cDNA FLJ25678 fis, clone TST04067, highly similar to PURINE NUCLEOSIDE PHOSPHORYLASE	P00491;Q8N7G1;Q9P1G4	1	5	5	5	5	5	5	5	5	5	5	5	5	5	5	5	26.3	26.3	26.3	32.551	293	6	6	6	6	3.22e-33	4347500	614070	598600	1922600	1212300	644400	639400	2071700	2031200	4
140	706			IPI00017704	IPI00017704	IPI00017704	1	1	1	Coactosin-like protein	CLP;COTL1	Coactosin-like protein	Q14019	1	1	1	1	1	1	1	1	1	1	1	1	1	1	1	1	11.3	11.3	11.3	15.945	142	1	2	2	1	7.56e-24	525870	48588	59655	356030	61596	29895	39676	442050	79691	4
148	2650			IPI00019141	IPI00019141	IPI00019141	1	1	1	1-acylglycerol-3-phosphate O-acyltransferase 1;1-acyl-sn-glycerol-3-phosphate acyltransferase alpha;Lysophosphatidic acid acyltransferase alpha;Protein G15;cDNA FLJ54610, highly similar to 1-acyl-sn-glycerol-3-phosphate acyltransferase alpha (EC 2.3.1.51);Putative uncharacterized protein;cDNA, FLJ78849, highly similar to 1-acyl-sn-glycerol-3-phosphate acyltransferase alpha (EC 2.3.1.51)	AGPAT1;G15	1-acyl-sn-glycerol-3-phosphate acyltransferase alpha	Q99943;A2BFI5;B4DRH1;Q71VH6;Q9HBM8	1	1	1	1	1	1	1	1	1	1	1	1	1	1	1	1	7.4	7.4	7.4	31.716	283	1	1	1	1	2.88e-13	132630	48292	38349	34780	11211	68887	56197	23874	12307	4
150	1004;1746			IPI00019372	IPI00019372	IPI00019372	2	2	2	Hematopoetic proteoglycan core protein;Platelet proteoglycan core protein;Secretory granule proteoglycan core protein;Serglycin	PRG;PRG1;SRGN	Serglycin	P10124	1	2	2	2	2	2	2	1	2	2	2	1	2	2	2	1	13.3	13.3	13.3	17.652	158	2	2	2	1	6.65e-08	3034800	1495100	643120	703500	193080	2068900	699220	623070	270480	4
153	807;3081			IPI00019399	IPI00019399	IPI00019399	2	2	2	Constitutively expressed serum amyloid A protein;Serum amyloid A-4 protein;Amyloid protein A	CSAA;SAA4	Serum amyloid A-4 protein	P35542;B2R5G8	1	2	2	2	2	2	2	2	2	2	2	2	2	2	2	2	23.8	23.8	23.8	14.807	130	3	2	2	3	3.64e-13	1563100	287700	275040	604020	396310	351640	306840	824150	462800	4
[truncated: 95 more rows]
[truncated: 7 more columns]

## Sheet: proteinGroups_1-2-2-5_SLE
																																																Intensity
																																																NOR-107	NOR-107
																																																MQ 1.1.1.36	MQ 1.2.2.5
[truncated: 601 more rows]
[truncated: 22 more columns]

## Sheet: 1-1-1-36 vs 1-2-2-5
																																For plotting purposes proteins with zero intensity in one of the calculations were omitted to allow for logaritmic axes in plots
[truncated: 602 more rows]
[truncated: 6 more columns]
